# Supplementary material for: Implications of variable synaptic weights for rate and temporal coding of cerebellar outputs
Source: eLife. 2024 Jan 19;13:e89095. doi: 10.7554/eLife.89095 (PMC10798666; doi:10.7554/eLife.89095)
Supplement: Figure 1—source data 1. [file elife-89095-fig1-data1.xlsx]

## Sheet: Fig 1a-c
Fig 1a-c WT PC-DCN unitary IPSCs
Fig 1a			Fig 1b			Fig 1c
trial	IPSC amplitude (pA)		trial	IPSC amplitude (pA)		trial	IPSC amplitude (pA)
1	692.898		1	158.58		1	6506.42
2	855.682		2	1365.85		2	6562.9
3	790.398		3	119.148		3	6248.98
4	826.136		4	133.807		4	78.4659
5	575.852		5	125.682		5	88.4659
6	145.852		6	1691.76		6	119.148
7	94.1477		7	169.773		7	6728.81
8	118.693		8	1430.11		8	6096.25
9	615.795		9	1604.32		9	170.966
10	124.091		10	166.477		10	6393.41
11	735.966		11	1751.59		11	133.352
12	126.761		12	1835.23		12	6829.2
13	162.159		13	2087.67		13	91.7614
14	713.523		14	63.4091		14	6480.74
15	185.511		15	1645.85		15	131.989
16	130.852		16	1696.08		16	7162.61
17	663.068		17	2009.89		17	108.636
18	136.307		18	110.795		18	71.1932
19	774.432		19	1835.51		19	6389.6
20	671.818		20	154.886		20	124.148
21	165.455		21	117.443		21	80.3409
22	182.614		22	1609.15		22	90.0568
23	125.739		23	1808.41		23	7306.82
24	241.193		24	235.227		24	6038.75
25	93.5795		25	114.659		25	5934.77
26	805.909		26	1165.62		26	131.875
27	140.227		27	271.989		27	6927.9
28	266.307		28	1790.85		28	74.375
29	143.807		29	167.955		29	5947.27
30	132.33					30	156.818
31	94.375					31	5934.38
32	194.318					32	76.1932
33	662.443					33	6022.33
34	93.0114					34	82.2727
35	96.7614					35	5774.66
36	770.852					36	5874.49
37	143.75					37	5407.39
38	128.182					38	105.966
39	625.682					39	6453.69
40	103.636					40	111.818
						41	5722.73
						42	5691.19

## Sheet: Fig 1d-e
Fig 1d-e WT PC-DCN unitary conductances
P10-20			P23-32
PC input	conductance (nS)		PC input	conductance (nS)
1	27.3		1	289.9
2	37.4		2	45.4
3	32.8		3	63.5
4	8.2		4	115.6
5	41.1		5	44
6	22.2		6	10.4
7	20.5		7	6.8
8	57.1		8	18.4
9	42.8		9	15.9
10	22.4		10	24.9
11	56.9		11	23.1
12	53.7		12	9.4
13	36.3		13	5.2
14	83.3		14	4
15	36.2		15	71.3
16	55.9		16	39.2
17	14.6		17	88.5
18	32.1		18	71.9
19	30		19	23.7
20	32.7		20	8.9
21	19.6		21	5.8
22	36.6		22	185
23	51		23	51.6
24	67		24	138.5
25	102.4		25	18.6
26	35.1		26	81.9
27	15.9		27	50
28	54.5		28	5.5
29	55.9		29	14.2
30	35.1		30	53.5
31	24.7		31	7.6
32	16.1		32	24.2
33	5.5		33	43.2
34	174.5		34	105.7
35	11.3		35	46.4
36	41.6		36	85.1
37	34.9		37	55.4
38	30.4		38	31.5
39	19.4		39	19.3
40	8.9		40	13.9
41	44.7		41	43.9
42	72.7		42	12.1
43	62.4		43	40.1
44	22.8		44	253.5
45	78.9		45	73.8
46	5.5		46	4.4
47	22.1		47	89
48	50.3		48	24.2
49	25.6		49	44
50	50.7		50	76.7
51	38.6		51	103
52	57.2		52	188.3
53	25.8		53	30.3
54	25.6		54	67.2
55	36.4		55	68.4
56	31.6		56	8.5
57	14.6		57	82.6
58	33.9		58	82.6
59	19.3		59	20.3
60	13.9		60	22
61	43.9		61	52
62	11		62	214.2
63	6.5		63	30.2
64	8.2		64	51.3
65	34.7		65	31.6
66	8.3		66	14.6
67	40.4		67	33.9
68	45.8		68	111.9
69	9.4		69	8.2
70	44		70	34.7
71	46.4		71	8.3
72	24.2		72	91.7
73	68.4		73	11
74	8.5		74	6.5
			75	90.3
			76	40.4
			77	45.8
			78	9.4
			79	3.1
			80	6.8
			81	75.1
			82	12.6
			83	57.1
