# Supplementary material for: Implications of variable synaptic weights for rate and temporal coding of cerebellar outputs
Source: eLife. 2024 Jan 19;13:e89095. doi: 10.7554/eLife.89095 (PMC10798666; doi:10.7554/eLife.89095)
Supplement: Figure 4—source data 1. [file elife-89095-fig4-data1.xlsx]

## Sheet: Fig 4b
Fig 4b CbN neuron firing rate
CbN firing (spikes/s)	Gi (nS)
cell	25	30	35	40	45	50	55	60	65
1	/	132.5	93.625	55.75	24.875	5	0.625	0.125	/
2	/	166.125	102.875	65.125	38.375	22.125	9.125	4	/
3	/	178.625	133.75	104.75	78.625	55.75	38.5	23.75	/
4	203.625	170.125	138.75	106.75	78.5	48.125	28.25	11.875	3.375
5	261.375	209.75	165.5	123.875	87.5	54.125	28.875	12	3.25
6	183.125	128.625	93.625	71.875	49.875	32.625	19	11.625	5.625
7	188.875	149.25	110.125	75	47.75	28.25	13.375	5	0.75
mean	209.25	162.143	119.75	86.1607	57.9286	35.1429	19.6786	9.76786	3.25
sem	17.9032	10.6749	10.2266	9.62116	8.95669	7.04648	4.9447	2.91693	0.996086

## Sheet: Fig 4e-g
Fig 4e-g conductance CV and CbN neuron firing rate
	input sizes
	constant	80 x 2.5 nS	40 x 5 nS	20 x 10 nS	10 x 20 nS	5 x 40 nS
CV	0	0.121897	0.174339	0.234305	0.343723	0.493373
CbN firing (spikes/s)	input sizes
cell	constant	80 x 2.5 nS	40 x 5 nS	20 x 10 nS	10 x 20 nS	5 x 40 nS
1	5.9	20.2	32.1	45	73.9	111.1
2	7.5	11.8333	21.4167	26.6667	51.9167	89.1667
3	3.0625	11.5625	19.6875	32.0625	59.1875	97.0625
4	39.0625	56.3125	68.3125	81.25	110.062	150.688
5	12.1875	27.625	40.8125	54.0625	85.3125	127.5
6	9.33333	19.3333	23.4167	32.9167	54.75	81.75
7	4	13.875	22.875	32.125	60.125	90.25
mean	11.578	22.9631	32.6601	43.4405	70.7506	106.788
sem	4.72989	5.95852	6.57151	7.2283	7.9053	9.36082

## Sheet: Fig 4h-i
Fig 4h-i different distribution and CbN neuron firing rate
distribution 1		distribution 2		distribution 3				uniform (40 x 5 nS)	distribution 1	distribution 2	distribution 3		CbN firing rate (spikes/s)
PC input	size (nS)	PC input	size (nS)	PC input	size (nS)		conductance CV	0.2	0.31	0.38	0.46		cell	uniform (40 x 5 nS)	distribution 1	distribution 2	distribution 3
1	0.695652	1	1.0087	1	1.0087								1	31.8333	40.5	46.3333	51.5
2	0.904348	2	1.91304	2	1.54783								2	25.875	47.875	60.625	84.125
3	1.0087	3	2.41739	3	1.91304								3	24.125	32.625	47.25	65
4	1.18261	4	3.2	4	2.10435								4	24.625	37.625	48.75	70.625
5	1.18261	5	4.2087	5	2.41739								5	28.1667	35.1667	48.5	65.6667
6	1.42609	6	4.2087	6	2.62609								6	30.25	36.125	48.5	63.625
7	1.63478	7	5.47826	7	3.23478
8	1.8087	8	6.81739	8	3.35652								mean	27.4792	38.3194	49.9931	66.7569
9	1.91304	9	6.97391	9	4.01739								sem	1.27905	2.18882	2.15994	4.33386
10	2.46957	10	7.02609	10	12.8348
11	3.2	11	7.02609	11	14.3652
12	4.12174	12	7.63478	12	15.7043
13	4.33043	13	7.65217	13	20.1043
14	4.33043	14	8.06957	14	32.1739
15	5.47826	15	8.92174	15	32.1739
16	5.49565	16	8.97391	16	50.4174
17	7.02609	17	9.93043
18	7.89565	18	13.3391
19	7.96522	19	19.4609
20	8.92174	20	21.6522
21	9.30435	21	44.087
22	12.4
23	14.2435
24	15.3913
25	15.9478
26	17.913
27	17.913
28	23.8957

## Sheet: Fig 4j
Fig 4j simulation CbN neuron firing rate
distribution	conductance CV	CbN firing rate (spikes/s)
0	0.34201	60.8
1	0.314529	49.7
2	0.374316	67.6
3	0.470616	104.6
4	0.415371	80.2
5	0.340459	55.4
6	0.335979	57.7
7	0.422103	84.2
8	0.392996	78.5
9	0.408837	80.1
10	0.431495	88.4
11	0.306327	51.4
12	0.410876	77.1
13	0.340402	57.9
14	0.442728	93.8
15	0.404122	78.1
16	0.389581	70.5
17	0.300379	47.7
18	0.281651	40.2
19	0.292834	42.2
20	0.302666	47.3
21	0.351785	61.5
22	0.296163	44.1
23	0.364383	66.3
24	0.413289	79.3
25	0.377576	72
26	0.336147	54.2
27	0.330795	58.3
28	0.417466	83.7
29	0.310528	50.3
30	0.371698	69.2
31	0.320827	53.9
32	0.386136	69.1
33	0.367448	67.5
34	0.359155	66.3
35	0.389646	76.3
36	0.329118	59.7
37	0.320831	52.8
38	0.404914	79.6
39	0.285321	42.4
40	0.313261	51
41	0.408408	82.3
42	0.393839	79.1
43	0.371881	71.5
44	0.354277	65.4
45	0.359621	69.3
46	0.325522	51.9
47	0.358638	67.2
48	0.43238	87.9
49	0.335356	55.2
50	0.376367	69.5
51	0.329232	55.5
52	0.374112	72.2
53	0.333099	53.1
54	0.337539	58.6
55	0.401333	77.1
56	0.363609	63.2
57	0.28464	38.8
58	0.434234	92
59	0.428349	88.1
60	0.347239	59.6
61	0.37781	69.2
62	0.498339	111.3
63	0.442691	90.4
64	0.325194	54
65	0.290571	44.2
66	0.409974	82.9
67	0.335208	63.1
68	0.305192	48.4
69	0.313496	48.1
70	0.446232	93.6
71	0.427937	83.9
72	0.378664	71.4
73	0.394003	77
74	0.331433	57.9
75	0.419749	82.8
76	0.425417	86.7
77	0.293186	44.1
78	0.423968	87.2
79	0.421778	88.1
80	0.357899	68.4
81	0.322834	54.2
82	0.396478	74.2
83	0.509529	118.9
84	0.312334	51.8
85	0.335443	57
86	0.309952	48.5
87	0.401483	79
88	0.329279	55.1
89	0.420625	85.9
90	0.440799	90.9
91	0.378699	70.7
92	0.404575	78.4
93	0.375639	71.8
94	0.318665	50.7
95	0.362914	64.5
96	0.411725	81.8
97	0.375327	71.6
98	0.384151	76.3
99	0.293018	41.4
100	0.289719	43.9
101	0.381972	62.9
102	0.488015	104.9
103	0.457988	96.9
104	0.296579	44.3
105	0.296925	44.9
106	0.352265	63.5
107	0.320611	51.5
108	0.333271	55.3
109	0.319552	49.9
110	0.529811	119.9
111	0.325496	55.5
112	0.408383	79.5
113	0.32453	53.8
114	0.366621	64.9
115	0.362908	62.6
116	0.315442	51.2
117	0.348231	58.2
118	0.462226	95.7
119	0.366513	63.6
120	0.427677	88.8
121	0.37668	70.1
122	0.357215	63.3
123	0.363413	67.3
124	0.369201	67.7
125	0.505075	113.9
126	0.325269	54.7
127	0.357465	64.4
128	0.425765	86.6
129	0.403592	73.7
130	0.271082	34.7
131	0.359039	64.1
132	0.449087	97.8
133	0.299679	48.9
134	0.371525	67.7
135	0.299221	45.8
136	0.274714	37
137	0.383415	75.4
138	0.272926	38.6
139	0.322216	51.1
140	0.443203	91.7
141	0.379046	67.4
142	0.366312	68
143	0.333998	57.3
144	0.345948	60.9
145	0.317606	52.9
146	0.281222	43.3
147	0.331043	56.3
148	0.352264	62.2
149	0.391088	75.3
150	0.398699	78.2
151	0.319427	55.7
152	0.399985	74.2
153	0.450646	95.6
154	0.461693	99.3
155	0.385177	70.3
156	0.374699	65.6
157	0.3574	66.7
158	0.364731	68.5
159	0.315714	53.5
160	0.330069	53.2
161	0.418099	87.8
162	0.367089	67.8
163	0.377451	75.3
164	0.324183	53.9
165	0.311246	50.2
166	0.407482	79.5
167	0.315085	52.1
168	0.318216	52.1
169	0.365691	70.1
170	0.294104	43.7
171	0.354956	63.8
172	0.376836	67.9
173	0.397676	79.8
174	0.440628	94.4
175	0.362861	65.7
176	0.380958	70.3
177	0.31278	48.2
178	0.304169	47.8
179	0.37729	71.3
180	0.30875	47.5
181	0.347197	56
182	0.417225	82
183	0.329811	57.6
184	0.311138	49.2
185	0.459199	99.6
186	0.499286	111.5
187	0.376464	66.8
188	0.426943	83.7
189	0.335433	58.7
190	0.42086	86.5
191	0.325948	54.9
192	0.30639	51.2
193	0.314347	48.4
194	0.404879	80.2
195	0.457711	100.6
196	0.453831	94.3
197	0.295931	48.9
198	0.318508	52.9
199	0.294293	42.1
200	0.340668	58.3
201	0.491443	107
202	0.383482	71
203	0.386672	70
204	0.267085	35.1
205	0.366646	64.5
206	0.389096	76.9
207	0.302535	45.6
208	0.342639	60.5
209	0.398778	75.3
210	0.301995	48.8
211	0.311829	49.2
212	0.352237	60.6
213	0.449981	95.4
214	0.344853	58.5
215	0.33772	58.3
216	0.317183	53.2
217	0.3509	65.5
218	0.42004	84
219	0.409139	78.4
220	0.445491	90.8
221	0.396143	66.8
222	0.392903	75.7
223	0.34125	60
224	0.368133	69.8
225	0.341654	55.6
226	0.454345	99.9
227	0.403178	73.8
228	0.380624	73.2
229	0.333247	57.4
230	0.492036	105.7
231	0.341975	57.4
232	0.351173	62.3
233	0.384426	71.2
234	0.326523	56
235	0.360211	64.6
236	0.287731	42.9
237	0.289967	42.1
238	0.352319	63
239	0.367364	65.9
240	0.374712	70.2
241	0.42917	86.7
242	0.332044	50.2
243	0.326695	52.2
244	0.313667	49
245	0.394474	78.2
246	0.323764	52.2
247	0.389563	78.5
248	0.420444	88
249	0.298039	42.7
250	0.427629	83.2
251	0.40321	81.2
252	0.387112	72.8
253	0.371603	68.9
254	0.355634	62.9
255	0.457153	97.1
256	0.42891	85.1
257	0.425525	88.1
258	0.253291	30.2
259	0.372285	67.9
260	0.325496	53.9
261	0.31922	51.4
262	0.280724	37.5
263	0.35186	62.8
264	0.3333	57.5
265	0.35281	65.7
266	0.424532	87.8
267	0.386482	76.2
268	0.461689	101
269	0.275859	37.1
270	0.426461	86.5
271	0.298656	45.5
272	0.376566	72.3
273	0.411352	80.9
274	0.424676	86.7
275	0.421773	87
276	0.404093	81.5
277	0.384034	74.6
278	0.459765	99.6
279	0.287567	43
280	0.360356	62.9
281	0.383481	72.4
282	0.314634	53.3
283	0.473073	99.9
284	0.273939	36.8
285	0.308853	51
286	0.375131	67.3
287	0.476279	104.7
288	0.310536	45.1
289	0.421161	83.3
290	0.407932	80.2
291	0.291375	43.8
292	0.387081	68.8
293	0.287889	41.8
294	0.35286	65.7
295	0.396626	77.1
296	0.330411	53.5
297	0.413635	79.7
298	0.364585	67.6
299	0.44672	95.2
300	0.380141	70.3
301	0.343337	57.2
302	0.425869	88.2
303	0.361701	61.8
304	0.412013	80.3
305	0.363448	65.8
306	0.427802	84.7
307	0.362479	69.4
308	0.402245	79.1
309	0.420278	84.2
310	0.337693	58.8
311	0.421213	80
312	0.408843	77.2
313	0.479969	101.1
314	0.385301	74.1
315	0.272376	38.5
316	0.3709	65.6
317	0.343777	58.7
318	0.387007	77.9
319	0.320016	49.6
320	0.384238	72.6
321	0.415954	81.1
322	0.3765	71.2
323	0.438077	90.9
324	0.338839	60.9
325	0.409948	81.9
326	0.325501	56.3
327	0.320294	54.7
328	0.339452	60.6
329	0.279396	38.1
330	0.435783	88.8
331	0.452076	92.1
332	0.387503	72.2
333	0.364617	68.4
334	0.320871	54.1
335	0.348817	62
336	0.424232	86.8
337	0.288912	41.3
338	0.339727	59.7
339	0.402658	78.2
340	0.420371	81.7
341	0.287374	39.6
342	0.454049	96.2
343	0.428854	89.5
344	0.316296	54.5
345	0.345729	59.7
346	0.327314	49.8
347	0.409285	76.4
348	0.416494	81.7
349	0.417201	86.8
350	0.425292	80.7
351	0.324157	54.6
352	0.422464	87.9
353	0.323054	53.9
354	0.441985	89.5
355	0.340329	59.9
356	0.35345	63.2
357	0.330431	54.4
358	0.326049	52.6
359	0.420473	86.6
360	0.371766	68
361	0.296347	44.6
362	0.344701	58.6
363	0.509363	114.4
364	0.374009	71.8
365	0.381936	71.3
366	0.445376	96.4
367	0.367581	68.7
368	0.298275	45.4
369	0.32608	54
370	0.321994	51.7
371	0.348032	64.2
372	0.400407	80.7
373	0.296124	45.4
374	0.377841	67.2
375	0.416709	86.3
376	0.346293	62.2
377	0.452507	98.4
378	0.392764	71.4
379	0.394032	73.6
380	0.471115	101.5
381	0.380928	71.9
382	0.283075	38.3
383	0.396158	70.4
384	0.27304	35
385	0.354735	64.2
386	0.319973	53.8
387	0.266047	33.9
388	0.463984	100.4
389	0.454438	100.2
390	0.394461	69.8
391	0.433048	90.5
392	0.402646	82.9
393	0.341225	58.6
394	0.316656	49.7
395	0.342828	57.8
396	0.37928	72.6
397	0.38446	76.8
398	0.356177	62.1
399	0.399709	76.3
400	0.364629	68.4
401	0.495809	107.3
402	0.313447	52.9
403	0.316842	48.9
404	0.372635	66.8
405	0.415999	80.5
406	0.423688	86
407	0.411226	80.1
408	0.429115	89.7
409	0.287825	43.7
410	0.304563	47.4
411	0.352173	64.2
412	0.358662	66.6
413	0.363896	68.4
414	0.351006	61.3
415	0.30293	46.5
416	0.405934	79
417	0.299932	45.9
418	0.448737	92.8
419	0.311432	51.1
420	0.301045	45.1
421	0.379508	72.1
422	0.278102	39.2
423	0.375899	67.3
424	0.31401	52
425	0.427089	90.2
426	0.357497	66.9
427	0.250856	30.7
428	0.506752	114.4
429	0.398764	74
430	0.37304	72.1
431	0.329896	54.2
432	0.435471	88.3
433	0.386047	71.9
434	0.442027	89
435	0.346734	64
436	0.442059	92.2
437	0.355892	62.4
438	0.406994	83.8
439	0.365922	67.3
440	0.4322	91
441	0.320894	52.5
442	0.423292	85.3
443	0.495131	111.5
444	0.367575	67.7
445	0.360694	67.7
446	0.328101	53.1
447	0.354298	62.9
448	0.436474	89.3
449	0.432549	91.3
450	0.424894	88.3
451	0.357868	61.3
452	0.429985	85.8
453	0.333758	57
454	0.341252	56.6
455	0.365909	66.3
456	0.385616	71.5
457	0.415487	79
458	0.350873	57.7
459	0.338827	61
460	0.36969	68.6
461	0.375432	69.8
462	0.403867	76.5
463	0.412922	74.5
464	0.394558	73.8
465	0.321928	50.3
466	0.305265	48
467	0.416803	86.5
468	0.345768	61.8
469	0.49281	108.3
470	0.346263	62.5
471	0.356442	64.1
472	0.395089	76.4
473	0.388059	77.2
474	0.430361	86.6
475	0.404161	81.8
476	0.315909	50.8
477	0.284625	40.4
478	0.392565	70.7
479	0.295712	42
480	0.490144	104.1
481	0.446289	92.4
482	0.354787	63.6
483	0.414268	83.2
484	0.392386	77.7
485	0.439306	90.2
486	0.384139	73.7
487	0.359597	62
488	0.351284	57.6
489	0.452009	92.7
490	0.298481	44.9
491	0.296754	44.2
492	0.412717	82.3
493	0.303654	47.8
494	0.357712	63.4
495	0.442839	88.5
496	0.367689	65.7
497	0.386408	75.8
498	0.283913	38.7
499	0.322305	52.4
500	0.346798	57.8
501	0.278538	39.1
502	0.322158	49.2
503	0.39902	79.3
504	0.399211	76.2
505	0.487917	107.9
506	0.376715	69.2
507	0.409599	84.6
508	0.389818	72.1
509	0.349704	60.8
510	0.351914	62.6
511	0.449677	93.4
512	0.430447	86.7
513	0.418385	85.7
514	0.277896	38.6
515	0.391815	79.2
516	0.274343	36.1
517	0.365046	67.7
518	0.309952	52.2
519	0.427483	84.4
520	0.335482	55.8
521	0.300549	46.6
522	0.361201	67.7
523	0.417102	82.1
524	0.404061	79.5
525	0.36358	67.2
526	0.31082	49.2
527	0.444078	94.3
528	0.378144	71.9
529	0.348617	62.4
530	0.405876	81.5
531	0.353528	56.7
532	0.444118	91.9
533	0.282978	38.3
534	0.498226	110.8
535	0.365697	67.3
536	0.40342	72.6
537	0.399806	73.7
538	0.384676	71.3
539	0.413616	84.9
540	0.319134	53
541	0.349746	63.3
542	0.391731	73.2
543	0.296822	43.6
544	0.400223	80.6
545	0.374433	68.6
546	0.34489	62.4
547	0.379975	73.6
548	0.378878	73.6
549	0.40524	78.7
550	0.376236	70.4
551	0.388808	70.9
552	0.445192	95.4
553	0.327965	52.9
554	0.437546	91.2
555	0.351311	62.7
556	0.328325	56.1
557	0.445721	92.3
558	0.379719	71.2
559	0.329023	53.4
560	0.327997	52.9
561	0.295657	45.4
562	0.333944	57.4
563	0.29893	44.9
564	0.370202	67.3
565	0.358577	66.4
566	0.308164	48.9
567	0.307973	49.8
568	0.452035	94.7
569	0.381352	72.2
570	0.30047	45.8
571	0.299112	45.7
572	0.39412	74.8
573	0.433683	84.5
574	0.382934	72.7
575	0.416149	84.1
576	0.380792	70.9
577	0.469679	100
578	0.364449	66.5
579	0.407727	82
580	0.422247	82.7
581	0.37054	68.4
582	0.404063	80.1
583	0.317666	55
584	0.306054	46.3
585	0.329541	51.1
586	0.435895	87.7
587	0.384441	63.3
588	0.387881	74.4
589	0.458897	96.4
590	0.419712	81.2
591	0.326544	51.8
592	0.353325	61.7
593	0.351234	64
594	0.31296	50.8
595	0.305828	49.4
596	0.329756	58.5
597	0.330777	52.1
598	0.391013	75.7
599	0.327324	53.8
600	0.39426	72.4
601	0.299328	43.4
602	0.253771	29.1
603	0.295114	44.5
604	0.438766	90.7
605	0.33848	55.9
606	0.475601	103.1
607	0.347331	63.9
608	0.341226	60.8
609	0.448512	94.1
610	0.325234	53.8
611	0.429283	85.9
612	0.296226	44.4
613	0.421506	86.9
614	0.357259	65.2
615	0.467872	101.4
616	0.379725	75.2
617	0.334986	56.2
618	0.354721	58.9
619	0.441699	93.1
620	0.373195	66.5
621	0.340049	59
622	0.464746	98.2
623	0.327853	57
624	0.371706	68.5
625	0.346932	63
626	0.369958	66.3
627	0.469569	100.7
628	0.290115	43.1
629	0.40733	79.3
630	0.42784	89.5
631	0.304079	48.9
632	0.420201	86.3
633	0.325154	52.1
634	0.306584	48.8
635	0.289124	38.7
636	0.408105	80.3
637	0.301588	48.3
638	0.446185	93
639	0.388813	75.9
640	0.466126	98.6
641	0.362396	59.8
642	0.369144	70
643	0.388427	72.3
644	0.413049	77.7
645	0.350294	64.2
646	0.410455	79.2
647	0.493746	110
648	0.283567	39.1
649	0.275099	35.8
650	0.412356	78.9
651	0.461168	97.9
652	0.313289	50.1
653	0.308756	48.8
654	0.428416	87.3
655	0.330566	59.6
656	0.447799	94
657	0.34442	61.9
658	0.388531	67.9
659	0.36343	66.7
660	0.379554	71.1
661	0.362375	69.5
662	0.312655	49.9
663	0.444906	92.2
664	0.440684	92.4
665	0.400435	71.6
666	0.384859	73.6
667	0.414187	80.5
668	0.313947	52.4
669	0.317851	51.6
670	0.40634	80.4
671	0.366439	67.8
672	0.429116	89.4
673	0.447313	90.9
674	0.340494	58.1
675	0.296531	45.1
676	0.377865	70.9
677	0.453314	95.7
678	0.396405	76.6
679	0.395142	70.2
680	0.428276	87.1
681	0.45718	96.1
682	0.365978	68.5
683	0.353432	62.9
684	0.315064	52.1
685	0.354134	63.8
686	0.411154	80.2
687	0.278588	39.6
688	0.335735	59.5
689	0.368497	69
690	0.307329	52
691	0.398047	77.8
692	0.350588	64.8
693	0.355807	62.8
694	0.381258	69.8
695	0.411831	79
696	0.289796	44.3
697	0.347668	65.7
698	0.409136	81.5
699	0.406587	79.2
700	0.367821	70.6
701	0.358541	64.5
702	0.308544	49.1
703	0.324069	52.9
704	0.405789	83.3
705	0.339736	55.4
706	0.354536	64.4
707	0.369649	69.6
708	0.291608	47
709	0.392766	76.2
710	0.401391	76.5
711	0.441349	92.4
712	0.322748	57.6
713	0.294048	43.2
714	0.340427	59.5
715	0.38336	73.8
716	0.376028	69.9
717	0.413275	82.9
718	0.427798	88
719	0.312017	49.6
720	0.328808	55.9
721	0.284353	40.4
722	0.333373	56.7
723	0.427168	86.7
724	0.292776	44.3
725	0.413052	77.4
726	0.338899	57
727	0.344736	60.2
728	0.386805	74.2
729	0.403415	77.8
730	0.328938	52.6
731	0.337912	59.7
732	0.412022	82.8
733	0.327101	51.4
734	0.373646	69.6
735	0.325688	51
736	0.420989	88.4
737	0.473122	102.1
738	0.304952	47.5
739	0.320974	50.5
740	0.403908	83.2
741	0.418861	81.8
742	0.442809	91.8
743	0.326128	53.2
744	0.401474	80.5
745	0.306176	48.7
746	0.499347	112.1
747	0.493497	108.3
748	0.487042	105.7
749	0.288055	42.4
750	0.398004	78.4
751	0.401152	80.6
752	0.389699	74
753	0.305459	49.2
754	0.326753	52.3
755	0.377071	67.4
756	0.343794	61.1
757	0.307631	49
758	0.409907	78
759	0.428329	88.4
760	0.368142	69
761	0.33795	59.3
762	0.289236	42.7
763	0.416158	88.8
764	0.443483	90.6
765	0.391808	71.4
766	0.349099	63.6
767	0.403029	77.2
768	0.441835	96.1
769	0.302296	45.8
770	0.433579	90.3
771	0.483902	104.2
772	0.329623	57.8
773	0.309346	52.5
774	0.390418	70.4
775	0.494319	109.4
776	0.351349	60.5
777	0.296849	46.6
778	0.43115	84
779	0.30119	44.8
780	0.325731	51.2
781	0.408274	78.7
782	0.387133	70.7
783	0.282215	40.6
784	0.419178	85.4
785	0.336701	57.5
786	0.366419	67.1
787	0.378772	72.5
788	0.370328	69
789	0.334691	56.8
790	0.348413	61.8
791	0.315712	53.2
792	0.332389	55.3
793	0.386317	74.3
794	0.384731	76.9
795	0.30492	49.7
796	0.280854	38.4
797	0.417031	85.9
798	0.276828	37.2
799	0.334766	58.5
800	0.341126	57
801	0.323376	56.1
802	0.425421	83.9
803	0.340364	56
804	0.383925	71.8
805	0.391989	75.6
806	0.300815	49.2
807	0.369238	64.7
808	0.315282	52.1
809	0.468109	99.1
810	0.341418	58.6
811	0.423759	88.8
812	0.454588	97.5
813	0.327074	56.1
814	0.368844	67.9
815	0.349065	61.4
816	0.545306	125
817	0.287493	41.7
818	0.302943	49.4
819	0.302517	47.3
820	0.466732	98.6
821	0.322133	53.4
822	0.417792	86.3
823	0.461326	96.6
824	0.409526	82
825	0.407181	76.5
826	0.300934	45.7
827	0.351597	61.2
828	0.366398	72.9
829	0.403808	81.6
830	0.343426	59.8
831	0.340675	58.1
832	0.439998	88.9
833	0.445572	96.4
834	0.3515	58
835	0.433711	92.7
836	0.367639	69.7
837	0.321994	54.4
838	0.301448	44.2
839	0.437171	90
840	0.373512	75.6
841	0.35118	60.5
842	0.429575	92.5
843	0.34166	58.9
844	0.316359	51.2
845	0.401339	77.6
846	0.342551	56.9
847	0.436355	86.1
848	0.451819	91.8
849	0.420441	91.3
850	0.358911	65.2
851	0.423569	81.2
852	0.371693	69.2
853	0.383146	70.1
854	0.384711	75.3
855	0.358953	67
856	0.306194	50.9
857	0.28982	41.1
858	0.367432	62.2
859	0.322578	55.7
860	0.404877	80.5
861	0.356279	66.3
862	0.442498	90.5
863	0.405665	76.1
864	0.427459	86.7
865	0.455055	95.4
866	0.496132	106.6
867	0.335225	55.3
868	0.37604	72.3
869	0.387848	73.1
870	0.473073	101.2
871	0.399362	77.2
872	0.386411	72.2
873	0.299883	46.7
874	0.402838	78.3
875	0.396432	77.3
876	0.369241	66.3
877	0.508709	114.8
878	0.345895	59.9
879	0.436467	91.3
880	0.353512	66.1
881	0.295916	40.5
882	0.434092	89.8
883	0.333451	57.8
884	0.416185	83
885	0.290119	41.9
886	0.347102	63.2
887	0.404046	76.1
888	0.309763	49.2
889	0.401391	81.5
890	0.282898	41.7
891	0.366431	71.5
892	0.291225	44.4
893	0.34496	58.3
894	0.43423	89.4
895	0.411983	82.9
896	0.430534	87.6
897	0.443012	91.8
898	0.41693	82.9
899	0.381557	71.5
900	0.347169	61.5
901	0.365859	69.8
902	0.377169	72.6
903	0.364738	67.7
904	0.411413	83.1
905	0.405223	75
906	0.47453	106.6
907	0.34246	57.8
908	0.355767	62.2
909	0.329315	52.4
910	0.369711	65.5
911	0.383263	77.1
912	0.467991	100.1
913	0.418	82.6
914	0.352513	60
915	0.394366	73.6
916	0.336135	56.3
917	0.431436	91.8
918	0.375685	69.4
919	0.354577	64.2
920	0.387405	73.2
921	0.350503	64.8
922	0.397953	73.9
923	0.297059	42.7
924	0.320319	49.8
925	0.355429	61.2
926	0.386756	72.6
927	0.373033	69.9
928	0.305727	45.7
929	0.393558	77.7
930	0.367424	64.8
931	0.302576	45.1
932	0.371166	71.9
933	0.363796	69.8
934	0.305247	49.5
935	0.431657	87.1
936	0.412257	79
937	0.307487	50.1
938	0.30564	44.6
939	0.417299	81.9
940	0.369742	69.1
941	0.482102	102
942	0.415745	80.5
943	0.367177	69.2
944	0.394526	72.2
945	0.396536	80.7
946	0.354836	62.3
947	0.391323	78.2
948	0.27394	36.8
949	0.373119	71.8
950	0.426228	87.4
951	0.323347	55.2
952	0.330433	57.5
953	0.34665	64.3
954	0.39424	77.1
955	0.307368	48.9
956	0.29912	46.9
957	0.476687	102.3
958	0.385476	67.7
959	0.350559	64.4
960	0.386291	75.3
961	0.359534	67.4
962	0.26922	35.3
963	0.362098	66.9
964	0.343547	59.6
965	0.410936	83.6
966	0.285379	41.1
967	0.401493	80.3
968	0.50493	113
969	0.389058	76.9
970	0.296325	45.1
971	0.413458	80.2
972	0.323494	53.2
973	0.374006	67.3
974	0.489784	105.1
975	0.362834	68.8
976	0.372796	67
977	0.337462	57.2
978	0.286888	40.6
979	0.381274	71.3
980	0.376999	74.5
981	0.332599	58.9
982	0.291035	42.3
983	0.444418	89.8
984	0.459182	97.6
985	0.294957	47.1
986	0.406297	83.2
987	0.357002	64.7
988	0.388503	76.9
989	0.329686	54.6
990	0.329195	55
991	0.439488	90
992	0.397138	71.3
993	0.339895	63.3
994	0.392876	72.9
995	0.408279	77.2
996	0.261616	32.2
997	0.299683	43.8
998	0.36762	63.7
999	0.385939	75.5
