# Supplementary material for: Implications of variable synaptic weights for rate and temporal coding of cerebellar outputs
Source: eLife. 2024 Jan 19;13:e89095. doi: 10.7554/eLife.89095 (PMC10798666; doi:10.7554/eLife.89095)
Supplement: Figure 5—source data 1. [file elife-89095-fig5-data1.xlsx]

## Sheet: Fig 5a and 5b
Fig 5a and 5b simulations
PC input	input size (nS)	input rate (Hz)	Gi (nS)	output rate (Hz)	distribution
0	0.695652	0	45.366	52.866	1
1	0.904348	0	45.3183	53.152	1
2	1.0087	0	45.2997	53.162	1
3	1.18261	0	45.266	53.734	1
4	1.18261	0	45.2538	53.72	1
5	1.42609	0	45.2018	53.812	1
6	1.63478	0	45.1541	54.289	1
7	1.8087	0	45.1153	54.418	1
8	1.91304	0	45.0806	54.959	1
9	2.46957	0	44.9548	55.527	1
10	3.2	0	44.7966	56.58	1
11	4.12174	0	44.5883	57.963	1
12	4.33043	0	44.5379	58.344	1
13	4.33043	0	44.545	58.278	1
14	5.47826	0	44.2928	59.903	1
15	5.49565	0	44.278	60.07	1
16	7.02609	0	43.9235	62.247	1
17	7.89565	0	43.728	63.588	1
18	7.96522	0	43.6955	63.776	1
19	8.92174	0	43.4965	64.833	1
20	9.30435	0	43.4042	65.771	1
21	12.4	0	42.6925	69.75	1
22	14.2435	0	42.2758	72.06	1
23	15.3913	0	41.9987	73.65	1
24	15.9478	0	41.882	73.978	1
25	17.913	0	41.44	76.213	1
26	17.913	0	41.4491	76.245	1
27	23.8957	0	40.0854	82.385	1
28	0.695652	10.6667	45.3783	52.453	1
29	0.904348	10.6667	45.3334	52.775	1
30	1.0087	10.6667	45.306	53.118	1
31	1.18261	10.6667	45.275	53.309	1
32	1.18261	10.6667	45.2655	53.606	1
33	1.42609	10.6667	45.2118	53.935	1
34	1.63478	10.6667	45.1691	54.107	1
35	1.8087	10.6667	45.1269	54.344	1
36	1.91304	10.6667	45.1115	54.581	1
37	2.46957	10.6667	44.9931	55.344	1
38	3.2	10.6667	44.8482	56.189	1
39	4.12174	10.6667	44.6552	57.415	1
40	4.33043	10.6667	44.6432	57.872	1
41	4.33043	10.6667	44.6512	57.723	1
42	5.47826	10.6667	44.4296	59.16	1
43	5.49565	10.6667	44.4321	59.297	1
44	7.02609	10.6667	44.1244	61.076	1
45	7.89565	10.6667	43.9627	62.154	1
46	7.96522	10.6667	43.9518	62.111	1
47	8.92174	10.6667	43.735	63.386	1
48	9.30435	10.6667	43.6596	64.015	1
49	12.4	10.6667	43.057	67.7	1
50	14.2435	10.6667	42.6814	69.502	1
51	15.3913	10.6667	42.4746	70.699	1
52	15.9478	10.6667	42.3514	71.364	1
53	17.913	10.6667	41.9632	73.148	1
54	17.913	10.6667	41.9748	73.043	1
55	23.8957	10.6667	40.8035	78.307	1
56	0.695652	21.3333	45.4137	52.366	1
57	0.904348	21.3333	45.394	52.656	1
58	1.0087	21.3333	45.3558	53.035	1
59	1.18261	21.3333	45.3335	53.118	1
60	1.18261	21.3333	45.3473	52.833	1
61	1.42609	21.3333	45.2954	53.119	1
62	1.63478	21.3333	45.2611	53.437	1
63	1.8087	21.3333	45.2286	53.651	1
64	1.91304	21.3333	45.2267	53.664	1
65	2.46957	21.3333	45.142	54.094	1
66	3.2	21.3333	45.0151	55.096	1
67	4.12174	21.3333	44.8492	56.188	1
68	4.33043	21.3333	44.8224	56.382	1
69	4.33043	21.3333	44.8242	56.648	1
70	5.47826	21.3333	44.623	57.742	1
71	5.49565	21.3333	44.6066	58.129	1
72	7.02609	21.3333	44.3472	59.788	1
73	7.89565	21.3333	44.2086	60.566	1
74	7.96522	21.3333	44.182	60.68	1
75	8.92174	21.3333	44.0287	61.264	1
76	9.30435	21.3333	43.9717	61.994	1
77	12.4	21.3333	43.457	64.727	1
78	14.2435	21.3333	43.1462	66.643	1
79	15.3913	21.3333	42.9552	67.667	1
80	15.9478	21.3333	42.8683	68.076	1
81	17.913	21.3333	42.5416	69.739	1
82	17.913	21.3333	42.5363	69.606	1
83	23.8957	21.3333	41.5378	74.153	1
84	0.695652	32	45.3902	52.645	1
85	0.904348	32	45.3745	52.899	1
86	1.0087	32	45.3679	52.716	1
87	1.18261	32	45.3454	53.048	1
88	1.18261	32	45.3357	53.165	1
89	1.42609	32	45.3009	53.312	1
90	1.63478	32	45.2826	53.364	1
91	1.8087	32	45.2575	53.457	1
92	1.91304	32	45.2408	53.706	1
93	2.46957	32	45.173	54.241	1
94	3.2	32	45.0743	54.766	1
95	4.12174	32	44.9611	55.522	1
96	4.33043	32	44.9407	55.551	1
97	4.33043	32	44.9345	55.692	1
98	5.47826	32	44.7678	56.913	1
99	5.49565	32	44.7698	56.795	1
100	7.02609	32	44.5637	58.087	1
101	7.89565	32	44.4461	58.83	1
102	7.96522	32	44.4296	58.806	1
103	8.92174	32	44.3042	59.813	1
104	9.30435	32	44.2475	60.062	1
105	12.4	32	43.8125	62.547	1
106	14.2435	32	43.5628	63.661	1
107	15.3913	32	43.4058	64.532	1
108	15.9478	32	43.3499	64.876	1
109	17.913	32	43.0611	66.445	1
110	17.913	32	43.0597	66.509	1
111	23.8957	32	42.2342	70.15	1
112	0.695652	42.6667	45.4662	52.06	1
113	0.904348	42.6667	45.4331	52.323	1
114	1.0087	42.6667	45.4221	52.689	1
115	1.18261	42.6667	45.4134	52.617	1
116	1.18261	42.6667	45.3966	52.879	1
117	1.42609	42.6667	45.3761	52.952	1
118	1.63478	42.6667	45.3594	52.992	1
119	1.8087	42.6667	45.3435	53.009	1
120	1.91304	42.6667	45.3189	53.3	1
121	2.46957	42.6667	45.253	53.708	1
122	3.2	42.6667	45.1737	54.296	1
123	4.12174	42.6667	45.0609	54.821	1
124	4.33043	42.6667	45.0458	54.882	1
125	4.33043	42.6667	45.0232	55.013	1
126	5.47826	42.6667	44.9135	55.734	1
127	5.49565	42.6667	44.9172	55.771	1
128	7.02609	42.6667	44.7581	56.993	1
129	7.89565	42.6667	44.6548	57.46	1
130	7.96522	42.6667	44.6534	57.499	1
131	8.92174	42.6667	44.5521	58.328	1
132	9.30435	42.6667	44.5212	58.259	1
133	12.4	42.6667	44.1888	60.09	1
134	14.2435	42.6667	44.0024	61.167	1
135	15.3913	42.6667	43.8769	61.635	1
136	15.9478	42.6667	43.825	61.974	1
137	17.913	42.6667	43.6205	62.985	1
138	17.913	42.6667	43.6411	62.771	1
139	23.8957	42.6667	42.9986	65.777	1
140	0.695652	53.3333	45.4455	52.069	1
141	0.904348	53.3333	45.416	52.153	1
142	1.0087	53.3333	45.4084	52.119	1
143	1.18261	53.3333	45.378	52.415	1
144	1.18261	53.3333	45.3928	52.509	1
145	1.42609	53.3333	45.3729	52.577	1
146	1.63478	53.3333	45.3564	52.869	1
147	1.8087	53.3333	45.3313	52.841	1
148	1.91304	53.3333	45.3318	52.753	1
149	2.46957	53.3333	45.2881	53.288	1
150	3.2	53.3333	45.2341	53.724	1
151	4.12174	53.3333	45.1633	54.186	1
152	4.33043	53.3333	45.1593	54.104	1
153	4.33043	53.3333	45.1688	54.176	1
154	5.47826	53.3333	45.0838	54.592	1
155	5.49565	53.3333	45.0819	54.572	1
156	7.02609	53.3333	44.9688	55.543	1
157	7.89565	53.3333	44.9099	55.654	1
158	7.96522	53.3333	44.9007	55.708	1
159	8.92174	53.3333	44.825	56.22	1
160	9.30435	53.3333	44.787	56.563	1
161	12.4	53.3333	44.56	57.688	1
162	14.2435	53.3333	44.4325	58.292	1
163	15.3913	53.3333	44.3382	58.517	1
164	15.9478	53.3333	44.2854	59.328	1
165	17.913	53.3333	44.138	59.836	1
166	17.913	53.3333	44.1292	59.853	1
167	23.8957	53.3333	43.6857	61.711	1
168	0.695652	64	45.5045	51.716	1
169	0.904348	64	45.4969	51.781	1
170	1.0087	64	45.4886	51.95	1
171	1.18261	64	45.4745	51.917	1
172	1.18261	64	45.4833	51.924	1
173	1.42609	64	45.4747	52.026	1
174	1.63478	64	45.4593	52.253	1
175	1.8087	64	45.4634	52.393	1
176	1.91304	64	45.4734	52.155	1
177	2.46957	64	45.448	52.123	1
178	3.2	64	45.4183	52.469	1
179	4.12174	64	45.3664	52.692	1
180	4.33043	64	45.3651	52.807	1
181	4.33043	64	45.3612	52.963	1
182	5.47826	64	45.3024	53.201	1
183	5.49565	64	45.2992	53.262	1
184	7.02609	64	45.2166	53.799	1
185	7.89565	64	45.1891	53.782	1
186	7.96522	64	45.1895	53.948	1
187	8.92174	64	45.1466	54.126	1
188	9.30435	64	45.1061	54.334	1
189	12.4	64	44.9517	55.329	1
190	14.2435	64	44.8667	55.507	1
191	15.3913	64	44.8101	55.833	1
192	15.9478	64	44.7872	56.055	1
193	17.913	64	44.6938	56.377	1
194	17.913	64	44.6908	56.403	1
195	23.8957	64	44.4306	57.606	1
196	0.695652	74.6667	45.5051	51.692	1
197	0.904348	74.6667	45.5037	51.651	1
198	1.0087	74.6667	45.5128	51.716	1
199	1.18261	74.6667	45.5057	51.947	1
200	1.18261	74.6667	45.5151	51.78	1
201	1.42609	74.6667	45.5163	51.681	1
202	1.63478	74.6667	45.5202	51.747	1
203	1.8087	74.6667	45.5158	51.752	1
204	1.91304	74.6667	45.5001	52.011	1
205	2.46957	74.6667	45.487	51.955	1
206	3.2	74.6667	45.4819	52.018	1
207	4.12174	74.6667	45.4589	52.321	1
208	4.33043	74.6667	45.4551	52.162	1
209	4.33043	74.6667	45.4644	52.25	1
210	5.47826	74.6667	45.4513	52.288	1
211	5.49565	74.6667	45.4345	52.508	1
212	7.02609	74.6667	45.4063	52.578	1
213	7.89565	74.6667	45.3983	52.479	1
214	7.96522	74.6667	45.4008	52.66	1
215	8.92174	74.6667	45.396	52.672	1
216	9.30435	74.6667	45.3852	52.661	1
217	12.4	74.6667	45.3301	52.937	1
218	14.2435	74.6667	45.3043	53.087	1
219	15.3913	74.6667	45.2875	53.108	1
220	15.9478	74.6667	45.2775	53.097	1
221	17.913	74.6667	45.2538	53.227	1
222	17.913	74.6667	45.2603	53.271	1
223	23.8957	74.6667	45.1514	53.579	1
224	0.695652	85.3333	45.5408	51.442	1
225	0.904348	85.3333	45.5253	51.524	1
226	1.0087	85.3333	45.5369	51.461	1
227	1.18261	85.3333	45.5351	51.582	1
228	1.18261	85.3333	45.5381	51.466	1
229	1.42609	85.3333	45.5391	51.529	1
230	1.63478	85.3333	45.5494	51.48	1
231	1.8087	85.3333	45.5467	51.493	1
232	1.91304	85.3333	45.5516	51.613	1
233	2.46957	85.3333	45.5521	51.713	1
234	3.2	85.3333	45.5538	51.395	1
235	4.12174	85.3333	45.5805	51.213	1
236	4.33043	85.3333	45.5859	51.116	1
237	4.33043	85.3333	45.5915	51.098	1
238	5.47826	85.3333	45.6022	50.952	1
239	5.49565	85.3333	45.617	50.892	1
240	7.02609	85.3333	45.6337	50.784	1
241	7.89565	85.3333	45.6467	50.548	1
242	7.96522	85.3333	45.6453	50.611	1
243	8.92174	85.3333	45.6614	50.641	1
244	9.30435	85.3333	45.6666	50.483	1
245	12.4	85.3333	45.7106	50.244	1
246	14.2435	85.3333	45.7443	50.05	1
247	15.3913	85.3333	45.757	50.184	1
248	15.9478	85.3333	45.7614	50.077	1
249	17.913	85.3333	45.7972	49.91	1
250	17.913	85.3333	45.7919	49.976	1
251	23.8957	85.3333	45.8803	49.751	1
252	0.695652	96	45.5171	51.605	1
253	0.904348	96	45.5253	51.691	1
254	1.0087	96	45.5406	51.57	1
255	1.18261	96	45.5402	51.425	1
256	1.18261	96	45.5635	51.438	1
257	1.42609	96	45.5688	51.355	1
258	1.63478	96	45.5843	51.341	1
259	1.8087	96	45.6115	50.988	1
260	1.91304	96	45.6139	51.184	1
261	2.46957	96	45.6303	51.174	1
262	3.2	96	45.6659	50.832	1
263	4.12174	96	45.7064	50.523	1
264	4.33043	96	45.7185	50.576	1
265	4.33043	96	45.7136	50.586	1
266	5.47826	96	45.746	50.317	1
267	5.49565	96	45.7445	50.017	1
268	7.02609	96	45.8183	49.56	1
269	7.89565	96	45.8661	49.432	1
270	7.96522	96	45.866	49.41	1
271	8.92174	96	45.9112	49.356	1
272	9.30435	96	45.9319	49.156	1
273	12.4	96	46.0704	48.291	1
274	14.2435	96	46.1417	47.904	1
275	15.3913	96	46.1849	47.652	1
276	15.9478	96	46.2128	47.765	1
277	17.913	96	46.2994	47.14	1
278	17.913	96	46.3076	47.2	1
279	23.8957	96	46.5658	46.01	1
280	0.695652	106.667	45.5737	51.39	1
281	0.904348	106.667	45.5961	51.293	1
282	1.0087	106.667	45.6036	51.35	1
283	1.18261	106.667	45.609	51.298	1
284	1.18261	106.667	45.6092	51.12	1
285	1.42609	106.667	45.6216	51.025	1
286	1.63478	106.667	45.6401	50.701	1
287	1.8087	106.667	45.6281	50.859	1
288	1.91304	106.667	45.6517	50.555	1
289	2.46957	106.667	45.6899	50.265	1
290	3.2	106.667	45.7372	50.153	1
291	4.12174	106.667	45.8099	49.644	1
292	4.33043	106.667	45.826	49.298	1
293	4.33043	106.667	45.8306	49.555	1
294	5.47826	106.667	45.9219	49.044	1
295	5.49565	106.667	45.9249	49.058	1
296	7.02609	106.667	46.0346	48.335	1
297	7.89565	106.667	46.1198	47.779	1
298	7.96522	106.667	46.1155	47.746	1
299	8.92174	106.667	46.1866	47.385	1
300	9.30435	106.667	46.216	47.379	1
301	12.4	106.667	46.4602	45.904	1
302	14.2435	106.667	46.6073	45.254	1
303	15.3913	106.667	46.6863	44.856	1
304	15.9478	106.667	46.7395	44.714	1
305	17.913	106.667	46.9003	43.715	1
306	17.913	106.667	46.8854	43.887	1
307	23.8957	106.667	47.3324	42.092	1
308	0.695652	117.333	45.5827	51.305	1
309	0.904348	117.333	45.5948	51.161	1
310	1.0087	117.333	45.6011	51.262	1
311	1.18261	117.333	45.6276	50.954	1
312	1.18261	117.333	45.6287	50.966	1
313	1.42609	117.333	45.6619	50.876	1
314	1.63478	117.333	45.6836	50.924	1
315	1.8087	117.333	45.683	50.67	1
316	1.91304	117.333	45.6852	50.732	1
317	2.46957	117.333	45.7463	50.292	1
318	3.2	117.333	45.8216	49.435	1
319	4.12174	117.333	45.9277	48.995	1
320	4.33043	117.333	45.9397	48.871	1
321	4.33043	117.333	45.9232	48.719	1
322	5.47826	117.333	46.0654	47.779	1
323	5.49565	117.333	46.0692	47.863	1
324	7.02609	117.333	46.2275	47.061	1
325	7.89565	117.333	46.3314	46.428	1
326	7.96522	117.333	46.3476	46.208	1
327	8.92174	117.333	46.4545	45.457	1
328	9.30435	117.333	46.505	45.135	1
329	12.4	117.333	46.8248	43.471	1
330	14.2435	117.333	47.0369	42.673	1
331	15.3913	117.333	47.1539	42.267	1
332	15.9478	117.333	47.2133	41.944	1
333	17.913	117.333	47.4227	41.073	1
334	17.913	117.333	47.4089	41.358	1
335	23.8957	117.333	48.0454	39.025	1
336	0.695652	128	45.5957	51.114	1
337	0.904348	128	45.6185	50.941	1
338	1.0087	128	45.6477	50.859	1
339	1.18261	128	45.6513	50.438	1
340	1.18261	128	45.664	50.513	1
341	1.42609	128	45.7029	50.303	1
342	1.63478	128	45.7385	49.932	1
343	1.8087	128	45.774	49.799	1
344	1.91304	128	45.7854	49.675	1
345	2.46957	128	45.8562	49.153	1
346	3.2	128	45.9686	48.42	1
347	4.12174	128	46.0906	47.673	1
348	4.33043	128	46.1224	47.459	1
349	4.33043	128	46.1093	47.267	1
350	5.47826	128	46.2605	46.43	1
351	5.49565	128	46.2591	46.628	1
352	7.02609	128	46.4814	45.248	1
353	7.89565	128	46.6192	44.451	1
354	7.96522	128	46.6369	44.485	1
355	8.92174	128	46.7775	43.758	1
356	9.30435	128	46.8293	43.397	1
357	12.4	128	47.2701	41.239	1
358	14.2435	128	47.5058	40.112	1
359	15.3913	128	47.6665	39.461	1
360	15.9478	128	47.7324	39.088	1
361	17.913	128	47.9939	38.19	1
362	17.913	128	47.9792	38.172	1
363	23.8957	128	48.7868	35.271	1
364	0.695652	138.667	45.6233	51.002	1
365	0.904348	138.667	45.6603	50.703	1
366	1.0087	138.667	45.6762	50.567	1
367	1.18261	138.667	45.7162	50.466	1
368	1.18261	138.667	45.7114	50.324	1
369	1.42609	138.667	45.7468	50.189	1
370	1.63478	138.667	45.7779	49.757	1
371	1.8087	138.667	45.8151	49.624	1
372	1.91304	138.667	45.83	49.57	1
373	2.46957	138.667	45.9227	49.014	1
374	3.2	138.667	46.0487	48.088	1
375	4.12174	138.667	46.2014	47.263	1
376	4.33043	138.667	46.2457	46.894	1
377	4.33043	138.667	46.2248	47.219	1
378	5.47826	138.667	46.4294	45.862	1
379	5.49565	138.667	46.4324	45.756	1
380	7.02609	138.667	46.6996	44.148	1
381	7.89565	138.667	46.8349	43.369	1
382	7.96522	138.667	46.8475	43.332	1
383	8.92174	138.667	47.0001	42.524	1
384	9.30435	138.667	47.0597	41.994	1
385	12.4	138.667	47.5662	39.472	1
386	14.2435	138.667	47.875	38.126	1
387	15.3913	138.667	48.069	37.13	1
388	15.9478	138.667	48.1619	36.796	1
389	17.913	138.667	48.4878	35.695	1
390	17.913	138.667	48.472	35.816	1
391	23.8957	138.667	49.4798	32.311	1
392	0.695652	149.333	45.6525	50.831	1
393	0.904348	149.333	45.687	50.611	1
394	1.0087	149.333	45.6815	50.539	1
395	1.18261	149.333	45.7129	50.219	1
396	1.18261	149.333	45.7181	50.129	1
397	1.42609	149.333	45.776	49.74	1
398	1.63478	149.333	45.8106	49.356	1
399	1.8087	149.333	45.854	49.243	1
400	1.91304	149.333	45.8857	49.04	1
401	2.46957	149.333	46.0032	48.304	1
402	3.2	149.333	46.1358	47.495	1
403	4.12174	149.333	46.3212	46.211	1
404	4.33043	149.333	46.3729	45.784	1
405	4.33043	149.333	46.3884	45.735	1
406	5.47826	149.333	46.5915	44.534	1
407	5.49565	149.333	46.6007	44.576	1
408	7.02609	149.333	46.9106	42.787	1
409	7.89565	149.333	47.0992	41.616	1
410	7.96522	149.333	47.1044	41.803	1
411	8.92174	149.333	47.3017	40.58	1
412	9.30435	149.333	47.3784	40.154	1
413	12.4	149.333	47.9971	37.182	1
414	14.2435	149.333	48.363	35.513	1
415	15.3913	149.333	48.5893	34.577	1
416	15.9478	149.333	48.6893	34.004	1
417	17.913	149.333	49.0638	32.844	1
418	17.913	149.333	49.0492	32.933	1
419	23.8957	149.333	50.2244	29.049	1
420	0.695652	160	45.678	50.685	1
421	0.904348	160	45.7273	50.446	1
422	1.0087	160	45.758	50.066	1
423	1.18261	160	45.7872	50.109	1
424	1.18261	160	45.7938	50.014	1
425	1.42609	160	45.8434	49.566	1
426	1.63478	160	45.9061	48.919	1
427	1.8087	160	45.9384	48.725	1
428	1.91304	160	45.976	48.673	1
429	2.46957	160	46.1061	47.649	1
430	3.2	160	46.2834	46.671	1
431	4.12174	160	46.4869	45.303	1
432	4.33043	160	46.5362	44.891	1
433	4.33043	160	46.5344	44.996	1
434	5.47826	160	46.807	43.5	1
435	5.49565	160	46.8077	43.449	1
436	7.02609	160	47.1471	41.413	1
437	7.89565	160	47.3301	40.44	1
438	7.96522	160	47.3468	40.223	1
439	8.92174	160	47.5631	39.069	1
440	9.30435	160	47.6301	38.61	1
441	12.4	160	48.3376	35.19	1
442	14.2435	160	48.7546	33.431	1
443	15.3913	160	49.0195	32.558	1
444	15.9478	160	49.1382	32.036	1
445	17.913	160	49.5891	30.247	1
446	17.913	160	49.5995	30.335	1
447	23.8957	160	50.9667	26.147	1
448	1.0087	0	45.2839	70.926	2
449	1.91304	0	45.0782	72.64	2
450	2.41739	0	44.9783	73.09	2
451	3.2	0	44.7536	74.654	2
452	4.2087	0	44.5568	76.397	2
453	4.2087	0	44.574	76.403	2
454	5.47826	0	44.3032	78.356	2
455	6.81739	0	43.9821	80.775	2
456	6.97391	0	43.9664	81.265	2
457	7.02609	0	43.922	81.497	2
458	7.02609	0	43.9145	81.341	2
459	7.63478	0	43.7637	82.373	2
460	7.65217	0	43.7556	82.478	2
461	8.06957	0	43.6785	82.886	2
462	8.92174	0	43.4769	84.396	2
463	8.97391	0	43.5037	84.61	2
464	9.93043	0	43.2879	85.954	2
465	13.3391	0	42.4861	91.344	2
466	19.4609	0	41.0922	99.482	2
467	21.6522	0	40.5871	102.008	2
468	44.087	0	35.4829	125.086	2
469	1.0087	10.6667	45.3362	70.329	2
470	1.91304	10.6667	45.1684	71.799	2
471	2.41739	10.6667	45.0477	72.837	2
472	3.2	10.6667	44.8843	74.187	2
473	4.2087	10.6667	44.6976	75.824	2
474	4.2087	10.6667	44.7033	75.697	2
475	5.47826	10.6667	44.451	77.319	2
476	6.81739	10.6667	44.2038	79.348	2
477	6.97391	10.6667	44.1424	79.468	2
478	7.02609	10.6667	44.1474	79.6	2
479	7.02609	10.6667	44.1303	79.608	2
480	7.63478	10.6667	44.0313	80.736	2
481	7.65217	10.6667	44.0308	80.571	2
482	8.06957	10.6667	43.9344	81.135	2
483	8.92174	10.6667	43.7614	82.5	2
484	8.97391	10.6667	43.7648	82.158	2
485	9.93043	10.6667	43.569	83.804	2
486	13.3391	10.6667	42.8851	88.245	2
487	19.4609	10.6667	41.6848	95.277	2
488	21.6522	10.6667	41.2664	97.276	2
489	44.087	10.6667	36.8407	116.953	2
490	1.0087	21.3333	45.3442	70.268	2
491	1.91304	21.3333	45.1934	71.506	2
492	2.41739	21.3333	45.087	72.078	2
493	3.2	21.3333	44.9728	73.288	2
494	4.2087	21.3333	44.794	74.504	2
495	4.2087	21.3333	44.7842	74.594	2
496	5.47826	21.3333	44.5966	75.934	2
497	6.81739	21.3333	44.3813	77.579	2
498	6.97391	21.3333	44.3559	77.887	2
499	7.02609	21.3333	44.3399	77.91	2
500	7.02609	21.3333	44.3365	77.663	2
501	7.63478	21.3333	44.2385	78.813	2
502	7.65217	21.3333	44.2332	78.671	2
503	8.06957	21.3333	44.1594	78.992	2
504	8.92174	21.3333	43.9841	80.452	2
505	8.97391	21.3333	44.0116	79.979	2
506	9.93043	21.3333	43.8268	81.325	2
507	13.3391	21.3333	43.2625	85.267	2
508	19.4609	21.3333	42.2553	91.256	2
509	21.6522	21.3333	41.8831	93.166	2
510	44.087	21.3333	38.1593	109.337	2
511	1.0087	32	45.4065	70.008	2
512	1.91304	32	45.261	71.284	2
513	2.41739	32	45.1744	71.876	2
514	3.2	32	45.0622	72.76	2
515	4.2087	32	44.9435	73.583	2
516	4.2087	32	44.961	73.525	2
517	5.47826	32	44.7475	74.87	2
518	6.81739	32	44.5757	76.287	2
519	6.97391	32	44.5745	76.291	2
520	7.02609	32	44.5781	76.337	2
521	7.02609	32	44.5488	76.302	2
522	7.63478	32	44.4856	77.189	2
523	7.65217	32	44.4515	77.01	2
524	8.06957	32	44.4165	77.49	2
525	8.92174	32	44.2838	78.308	2
526	8.97391	32	44.2977	78.17	2
527	9.93043	32	44.1724	79.23	2
528	13.3391	32	43.713	82.023	2
529	19.4609	32	42.8807	87.093	2
530	21.6522	32	42.5694	88.513	2
531	44.087	32	39.5077	101.733	2
532	1.0087	42.6667	45.4278	69.492	2
533	1.91304	42.6667	45.3044	70.505	2
534	2.41739	42.6667	45.2607	70.981	2
535	3.2	42.6667	45.191	71.581	2
536	4.2087	42.6667	45.0803	72.486	2
537	4.2087	42.6667	45.0798	72.398	2
538	5.47826	42.6667	44.9525	73.353	2
539	6.81739	42.6667	44.8109	74.161	2
540	6.97391	42.6667	44.7947	74.141	2
541	7.02609	42.6667	44.785	74.392	2
542	7.02609	42.6667	44.7729	74.458	2
543	7.63478	42.6667	44.7284	74.797	2
544	7.65217	42.6667	44.7495	74.746	2
545	8.06957	42.6667	44.6734	75.559	2
546	8.92174	42.6667	44.6069	75.752	2
547	8.97391	42.6667	44.5661	76.097	2
548	9.93043	42.6667	44.4943	76.379	2
549	13.3391	42.6667	44.1158	78.899	2
550	19.4609	42.6667	43.4615	82.901	2
551	21.6522	42.6667	43.2057	84.154	2
552	44.087	42.6667	40.8435	93.781	2
553	1.0087	53.3333	45.4104	69.772	2
554	1.91304	53.3333	45.3637	69.994	2
555	2.41739	53.3333	45.2969	70.697	2
556	3.2	53.3333	45.2779	70.834	2
557	4.2087	53.3333	45.1964	71.185	2
558	4.2087	53.3333	45.1874	71.455	2
559	5.47826	53.3333	45.1388	71.74	2
560	6.81739	53.3333	45.0115	72.603	2
561	6.97391	53.3333	44.9755	72.933	2
562	7.02609	53.3333	44.9792	73.039	2
563	7.02609	53.3333	44.9841	73.009	2
564	7.63478	53.3333	44.9191	73.548	2
565	7.65217	53.3333	44.9286	73.379	2
566	8.06957	53.3333	44.8992	73.269	2
567	8.92174	53.3333	44.8346	74.008	2
568	8.97391	53.3333	44.834	74.223	2
569	9.93043	53.3333	44.7325	74.756	2
570	13.3391	53.3333	44.4971	76.175	2
571	19.4609	53.3333	44.0323	78.943	2
572	21.6522	53.3333	43.8547	79.855	2
573	44.087	53.3333	42.1627	86.861	2
574	1.0087	64	45.4866	69.268	2
575	1.91304	64	45.4539	69.513	2
576	2.41739	64	45.4318	69.678	2
577	3.2	64	45.3887	70.054	2
578	4.2087	64	45.3338	70.629	2
579	4.2087	64	45.3558	70.713	2
580	5.47826	64	45.271	71.26	2
581	6.81739	64	45.214	71.316	2
582	6.97391	64	45.1903	71.574	2
583	7.02609	64	45.2094	71.2	2
584	7.02609	64	45.2225	71.136	2
585	7.63478	64	45.1796	71.561	2
586	7.65217	64	45.147	71.695	2
587	8.06957	64	45.1206	71.793	2
588	8.92174	64	45.1124	72.106	2
589	8.97391	64	45.1263	71.992	2
590	9.93043	64	45.0888	72.013	2
591	13.3391	64	44.909	73.253	2
592	19.4609	64	44.628	74.702	2
593	21.6522	64	44.5353	75.019	2
594	44.087	64	43.5099	79.423	2
595	1.0087	74.6667	45.4715	69.572	2
596	1.91304	74.6667	45.461	69.637	2
597	2.41739	74.6667	45.4445	69.614	2
598	3.2	74.6667	45.4066	70.017	2
599	4.2087	74.6667	45.4127	70.21	2
600	4.2087	74.6667	45.4177	69.957	2
601	5.47826	74.6667	45.3918	70	2
602	6.81739	74.6667	45.3726	70.141	2
603	6.97391	74.6667	45.3613	70.201	2
604	7.02609	74.6667	45.3823	69.982	2
605	7.02609	74.6667	45.3885	69.985	2
606	7.63478	74.6667	45.3882	70.032	2
607	7.65217	74.6667	45.372	69.969	2
608	8.06957	74.6667	45.3309	70.479	2
609	8.92174	74.6667	45.3549	70.247	2
610	8.97391	74.6667	45.3207	70.653	2
611	9.93043	74.6667	45.316	70.467	2
612	13.3391	74.6667	45.2507	70.869	2
613	19.4609	74.6667	45.1683	71.184	2
614	21.6522	74.6667	45.1696	71.472	2
615	44.087	74.6667	44.8126	72.979	2
616	1.0087	85.3333	45.5143	68.76	2
617	1.91304	85.3333	45.552	68.84	2
618	2.41739	85.3333	45.533	68.781	2
619	3.2	85.3333	45.5304	68.755	2
620	4.2087	85.3333	45.5651	68.579	2
621	4.2087	85.3333	45.6024	68.427	2
622	5.47826	85.3333	45.5848	68.447	2
623	6.81739	85.3333	45.6206	68.118	2
624	6.97391	85.3333	45.614	68.35	2
625	7.02609	85.3333	45.6115	68.284	2
626	7.02609	85.3333	45.6382	67.813	2
627	7.63478	85.3333	45.6313	68.29	2
628	7.65217	85.3333	45.6286	68.045	2
629	8.06957	85.3333	45.6137	68.184	2
630	8.92174	85.3333	45.6232	68.302	2
631	8.97391	85.3333	45.6299	68.158	2
632	9.93043	85.3333	45.6661	67.739	2
633	13.3391	85.3333	45.7154	67.626	2
634	19.4609	85.3333	45.7993	67.134	2
635	21.6522	85.3333	45.8408	66.849	2
636	44.087	85.3333	46.178	65.337	2
637	1.0087	96	45.5887	68.396	2
638	1.91304	96	45.6386	68.095	2
639	2.41739	96	45.6431	68.105	2
640	3.2	96	45.6564	67.872	2
641	4.2087	96	45.7098	67.512	2
642	4.2087	96	45.707	67.64	2
643	5.47826	96	45.7715	67.087	2
644	6.81739	96	45.8188	66.699	2
645	6.97391	96	45.8393	66.479	2
646	7.02609	96	45.8405	66.618	2
647	7.02609	96	45.8196	66.542	2
648	7.63478	96	45.8852	66.388	2
649	7.65217	96	45.8895	66.361	2
650	8.06957	96	45.906	66.251	2
651	8.92174	96	45.942	66.189	2
652	8.97391	96	45.9189	66.179	2
653	9.93043	96	45.9898	65.636	2
654	13.3391	96	46.1244	64.838	2
655	19.4609	96	46.4072	63.202	2
656	21.6522	96	46.5186	62.728	2
657	44.087	96	47.5481	58.796	2
658	1.0087	106.667	45.6179	68.456	2
659	1.91304	106.667	45.6598	67.997	2
660	2.41739	106.667	45.6789	67.941	2
661	3.2	106.667	45.7399	67.598	2
662	4.2087	106.667	45.7936	66.945	2
663	4.2087	106.667	45.7861	66.775	2
664	5.47826	106.667	45.8835	66.112	2
665	6.81739	106.667	45.995	65.065	2
666	6.97391	106.667	46.0157	65.138	2
667	7.02609	106.667	46.0032	65.345	2
668	7.02609	106.667	46.0126	65.459	2
669	7.63478	106.667	46.0295	65.145	2
670	7.65217	106.667	46.0286	65.213	2
671	8.06957	106.667	46.0714	64.998	2
672	8.92174	106.667	46.1306	64.68	2
673	8.97391	106.667	46.1527	64.253	2
674	9.93043	106.667	46.2156	64.023	2
675	13.3391	106.667	46.5179	62.094	2
676	19.4609	106.667	46.969	59.569	2
677	21.6522	106.667	47.1388	59.201	2
678	44.087	106.667	48.8443	52.764	2
679	1.0087	117.333	45.6183	68.204	2
680	1.91304	117.333	45.7238	67.656	2
681	2.41739	117.333	45.7754	67.218	2
682	3.2	117.333	45.8606	66.316	2
683	4.2087	117.333	45.9625	65.325	2
684	4.2087	117.333	45.955	65.779	2
685	5.47826	117.333	46.1025	64.577	2
686	6.81739	117.333	46.2307	63.884	2
687	6.97391	117.333	46.2445	63.522	2
688	7.02609	117.333	46.2423	63.568	2
689	7.02609	117.333	46.2559	63.387	2
690	7.63478	117.333	46.3132	63.158	2
691	7.65217	117.333	46.3486	62.8	2
692	8.06957	117.333	46.4061	62.685	2
693	8.92174	117.333	46.4847	62.171	2
694	8.97391	117.333	46.4514	62.366	2
695	9.93043	117.333	46.5416	61.711	2
696	13.3391	117.333	46.9143	59.316	2
697	19.4609	117.333	47.5692	55.963	2
698	21.6522	117.333	47.8026	54.781	2
699	44.087	117.333	50.1808	46.805	2
700	1.0087	128	45.6372	68.187	2
701	1.91304	128	45.7624	67.148	2
702	2.41739	128	45.8164	66.792	2
703	3.2	128	45.9422	66.089	2
704	4.2087	128	46.068	64.916	2
705	4.2087	128	46.0783	64.876	2
706	5.47826	128	46.2526	63.393	2
707	6.81739	128	46.4136	62.254	2
708	6.97391	128	46.4649	62.406	2
709	7.02609	128	46.4819	62.138	2
710	7.02609	128	46.4663	61.946	2
711	7.63478	128	46.5423	61.636	2
712	7.65217	128	46.542	61.439	2
713	8.06957	128	46.5917	61.297	2
714	8.92174	128	46.7208	60.401	2
715	8.97391	128	46.6952	60.399	2
716	9.93043	128	46.8372	59.548	2
717	13.3391	128	47.2887	56.732	2
718	19.4609	128	48.1248	52.38	2
719	21.6522	128	48.4627	51.115	2
720	44.087	128	51.5217	41.187	2
721	1.0087	138.667	45.6868	67.72	2
722	1.91304	138.667	45.8266	66.815	2
723	2.41739	138.667	45.8915	66.225	2
724	3.2	138.667	46.0499	65.041	2
725	4.2087	138.667	46.206	63.993	2
726	4.2087	138.667	46.2216	63.786	2
727	5.47826	138.667	46.434	62.23	2
728	6.81739	138.667	46.6493	60.504	2
729	6.97391	138.667	46.7014	60.355	2
730	7.02609	138.667	46.6855	60.621	2
731	7.02609	138.667	46.7127	60.43	2
732	7.63478	138.667	46.8027	59.784	2
733	7.65217	138.667	46.8096	59.589	2
734	8.06957	138.667	46.8801	59.073	2
735	8.92174	138.667	47.0075	58.089	2
736	8.97391	138.667	47.0432	58.235	2
737	9.93043	138.667	47.1538	57.326	2
738	13.3391	138.667	47.7448	53.753	2
739	19.4609	138.667	48.7643	48.654	2
740	21.6522	138.667	49.1296	47.426	2
741	44.087	138.667	52.8949	35.704	2
742	1.0087	149.333	45.6602	68.01	2
743	1.91304	149.333	45.8882	66.232	2
744	2.41739	149.333	45.9699	65.576	2
745	3.2	149.333	46.1404	64.164	2
746	4.2087	149.333	46.3428	63.044	2
747	4.2087	149.333	46.3112	62.977	2
748	5.47826	149.333	46.5386	61.316	2
749	6.81739	149.333	46.832	59.273	2
750	6.97391	149.333	46.8333	59.244	2
751	7.02609	149.333	46.8694	59.132	2
752	7.02609	149.333	46.8751	59.114	2
753	7.63478	149.333	46.9997	58.358	2
754	7.65217	149.333	47.0145	58.326	2
755	8.06957	149.333	47.0876	57.585	2
756	8.92174	149.333	47.2709	56.495	2
757	8.97391	149.333	47.2551	56.661	2
758	9.93043	149.333	47.4568	55.296	2
759	13.3391	149.333	48.1223	51.484	2
760	19.4609	149.333	49.3365	45.345	2
761	21.6522	149.333	49.7894	43.558	2
762	44.087	149.333	54.1896	31.001	2
763	1.0087	160	45.7733	66.88	2
764	1.91304	160	45.9477	65.494	2
765	2.41739	160	46.0519	64.851	2
766	3.2	160	46.2567	63.394	2
767	4.2087	160	46.4888	61.666	2
768	4.2087	160	46.4749	61.826	2
769	5.47826	160	46.7788	59.624	2
770	6.81739	160	47.0823	57.619	2
771	6.97391	160	47.1484	57.183	2
772	7.02609	160	47.117	57.244	2
773	7.02609	160	47.1163	57.231	2
774	7.63478	160	47.2519	56.302	2
775	7.65217	160	47.2656	56.23	2
776	8.06957	160	47.3692	55.687	2
777	8.92174	160	47.5776	54.577	2
778	8.97391	160	47.5642	54.241	2
779	9.93043	160	47.7821	52.982	2
780	13.3391	160	48.567	48.356	2
781	19.4609	160	49.9452	41.926	2
782	21.6522	160	50.4626	39.836	2
783	44.087	160	55.5542	26.08	2
784	1.0087	0	45.2969	103.596	3
785	1.54783	0	45.1619	104.595	3
786	1.91304	0	45.07	105.431	3
787	2.10435	0	45.0235	105.481	3
788	2.41739	0	44.9488	105.754	3
789	2.62609	0	44.9107	106.177	3
790	3.23478	0	44.7685	107.326	3
791	3.35652	0	44.7703	107.233	3
792	4.01739	0	44.6106	108.513	3
793	12.8348	0	42.6277	122.778	3
794	14.3652	0	42.2538	124.925	3
795	15.7043	0	41.954	127.139	3
796	20.1043	0	40.9495	133.437	3
797	32.1739	0	38.2085	148.62	3
798	32.1739	0	38.1776	149.033	3
799	50.4174	0	34.0505	168.381	3
800	1.0087	10.6667	45.2696	103.985	3
801	1.54783	10.6667	45.1727	104.61	3
802	1.91304	10.6667	45.1265	104.948	3
803	2.10435	10.6667	45.0827	105.493	3
804	2.41739	10.6667	45.0048	106.085	3
805	2.62609	10.6667	44.9913	106.061	3
806	3.23478	10.6667	44.898	106.948	3
807	3.35652	10.6667	44.867	107.219	3
808	4.01739	10.6667	44.7461	107.754	3
809	12.8348	10.6667	42.9953	120.108	3
810	14.3652	10.6667	42.7178	122.155	3
811	15.7043	10.6667	42.4602	123.92	3
812	20.1043	10.6667	41.5631	129.82	3
813	32.1739	10.6667	39.1562	142.787	3
814	32.1739	10.6667	39.1103	143.288	3
815	50.4174	10.6667	35.5258	159.83	3
816	1.0087	21.3333	45.3347	103.535	3
817	1.54783	21.3333	45.2155	104.354	3
818	1.91304	21.3333	45.2176	104.217	3
819	2.10435	21.3333	45.1459	104.931	3
820	2.41739	21.3333	45.1126	105.232	3
821	2.62609	21.3333	45.0913	105.204	3
822	3.23478	21.3333	44.9968	105.965	3
823	3.35652	21.3333	44.9814	106.051	3
824	4.01739	21.3333	44.8502	106.913	3
825	12.8348	21.3333	43.3537	117.528	3
826	14.3652	21.3333	43.1224	118.966	3
827	15.7043	21.3333	42.9048	120.905	3
828	20.1043	21.3333	42.1466	125.269	3
829	32.1739	21.3333	40.1087	136.398	3
830	32.1739	21.3333	40.1322	136.366	3
831	50.4174	21.3333	37.0707	150.374	3
832	1.0087	32	45.3952	102.853	3
833	1.54783	32	45.3173	103.32	3
834	1.91304	32	45.2554	103.789	3
835	2.10435	32	45.1998	104.096	3
836	2.41739	32	45.175	104.548	3
837	2.62609	32	45.1371	104.643	3
838	3.23478	32	45.0676	105.097	3
839	3.35652	32	45.0383	105.56	3
840	4.01739	32	44.9715	105.701	3
841	12.8348	32	43.7473	114.617	3
842	14.3652	32	43.5611	115.958	3
843	15.7043	32	43.3413	117.378	3
844	20.1043	32	42.7482	121.165	3
845	32.1739	32	41.1111	130.009	3
846	32.1739	32	41.0735	130.211	3
847	50.4174	32	38.6253	141.152	3
848	1.0087	42.6667	45.4215	102.884	3
849	1.54783	42.6667	45.3448	103.289	3
850	1.91304	42.6667	45.2951	103.859	3
851	2.10435	42.6667	45.2986	103.678	3
852	2.41739	42.6667	45.2395	104.264	3
853	2.62609	42.6667	45.2105	104.482	3
854	3.23478	42.6667	45.1664	104.957	3
855	3.35652	42.6667	45.1186	105.108	3
856	4.01739	42.6667	45.1011	105.215	3
857	12.8348	42.6667	44.1573	111.888	3
858	14.3652	42.6667	44.0164	112.866	3
859	15.7043	42.6667	43.8509	113.812	3
860	20.1043	42.6667	43.3866	116.494	3
861	32.1739	42.6667	42.0929	123.739	3
862	32.1739	42.6667	42.1082	123.433	3
863	50.4174	42.6667	40.173	132.414	3
864	1.0087	53.3333	45.3828	103.257	3
865	1.54783	53.3333	45.3642	103.478	3
866	1.91304	53.3333	45.3525	103.08	3
867	2.10435	53.3333	45.3345	103.39	3
868	2.41739	53.3333	45.3193	103.423	3
869	2.62609	53.3333	45.2851	103.892	3
870	3.23478	53.3333	45.2429	103.912	3
871	3.35652	53.3333	45.2362	104.048	3
872	4.01739	53.3333	45.204	104.437	3
873	12.8348	53.3333	44.524	109.191	3
874	14.3652	53.3333	44.4462	109.586	3
875	15.7043	53.3333	44.3474	110.374	3
876	20.1043	53.3333	43.9877	112.371	3
877	32.1739	53.3333	43.0485	117.798	3
878	32.1739	53.3333	43.0402	117.77	3
879	50.4174	53.3333	41.6536	123.959	3
880	1.0087	64	45.4843	102.267	3
881	1.54783	64	45.4212	102.593	3
882	1.91304	64	45.4216	102.722	3
883	2.10435	64	45.3557	103.259	3
884	2.41739	64	45.3628	103.215	3
885	2.62609	64	45.3464	103.035	3
886	3.23478	64	45.3371	103.413	3
887	3.35652	64	45.3245	103.539	3
888	4.01739	64	45.3049	103.435	3
889	12.8348	64	44.9059	106.213	3
890	14.3652	64	44.8522	106.699	3
891	15.7043	64	44.7905	107.131	3
892	20.1043	64	44.577	108.331	3
893	32.1739	64	44.0281	111.339	3
894	32.1739	64	44.0353	111.281	3
895	50.4174	64	43.2048	115.027	3
896	1.0087	74.6667	45.4537	102.339	3
897	1.54783	74.6667	45.5065	102.194	3
898	1.91304	74.6667	45.4928	102.185	3
899	2.10435	74.6667	45.5111	101.912	3
900	2.41739	74.6667	45.4959	102.29	3
901	2.62609	74.6667	45.4778	102.448	3
902	3.23478	74.6667	45.4598	102.389	3
903	3.35652	74.6667	45.4449	102.582	3
904	4.01739	74.6667	45.4292	102.529	3
905	12.8348	74.6667	45.2789	103.683	3
906	14.3652	74.6667	45.2533	103.638	3
907	15.7043	74.6667	45.2566	103.907	3
908	20.1043	74.6667	45.1943	103.907	3
909	32.1739	74.6667	45.019	105.191	3
910	32.1739	74.6667	45.0222	105.36	3
911	50.4174	74.6667	44.7269	106.626	3
912	1.0087	85.3333	45.5694	101.642	3
913	1.54783	85.3333	45.5759	101.426	3
914	1.91304	85.3333	45.5801	101.541	3
915	2.10435	85.3333	45.5781	101.75	3
916	2.41739	85.3333	45.5912	101.591	3
917	2.62609	85.3333	45.5897	101.553	3
918	3.23478	85.3333	45.5829	101.411	3
919	3.35652	85.3333	45.583	101.669	3
920	4.01739	85.3333	45.5803	101.63	3
921	12.8348	85.3333	45.7311	100.502	3
922	14.3652	85.3333	45.7436	100.616	3
923	15.7043	85.3333	45.7536	100.543	3
924	20.1043	85.3333	45.8245	99.999	3
925	32.1739	85.3333	46.0217	98.761	3
926	32.1739	85.3333	46.0277	98.826	3
927	50.4174	85.3333	46.3171	97.489	3
928	1.0087	96	45.5661	101.711	3
929	1.54783	96	45.5775	101.656	3
930	1.91304	96	45.5763	101.648	3
931	2.10435	96	45.5808	101.422	3
932	2.41739	96	45.6055	101.36	3
933	2.62609	96	45.6172	101.209	3
934	3.23478	96	45.6866	100.954	3
935	3.35652	96	45.6571	101.001	3
936	4.01739	96	45.7204	100.694	3
937	12.8348	96	46.0922	97.956	3
938	14.3652	96	46.1755	97.388	3
939	15.7043	96	46.2352	97.145	3
940	20.1043	96	46.446	95.778	3
941	32.1739	96	46.9701	92.934	3
942	32.1739	96	47.0079	92.882	3
943	50.4174	96	47.8264	89.508	3
944	1.0087	106.667	45.5775	101.63	3
945	1.54783	106.667	45.5936	101.482	3
946	1.91304	106.667	45.6394	101.267	3
947	2.10435	106.667	45.6814	100.893	3
948	2.41739	106.667	45.6857	100.848	3
949	2.62609	106.667	45.7168	100.556	3
950	3.23478	106.667	45.7448	100.184	3
951	3.35652	106.667	45.7772	100.275	3
952	4.01739	106.667	45.8087	99.75	3
953	12.8348	106.667	46.4688	95.332	3
954	14.3652	106.667	46.5914	94.39	3
955	15.7043	106.667	46.7	93.826	3
956	20.1043	106.667	47.0276	92.062	3
957	32.1739	106.667	47.9827	87.057	3
958	32.1739	106.667	47.9764	87.21	3
959	50.4174	106.667	49.3555	81.686	3
960	1.0087	117.333	45.6232	101.031	3
961	1.54783	117.333	45.6763	100.94	3
962	1.91304	117.333	45.6853	100.522	3
963	2.10435	117.333	45.7058	100.157	3
964	2.41739	117.333	45.7859	99.804	3
965	2.62609	117.333	45.8126	99.296	3
966	3.23478	117.333	45.9105	98.775	3
967	3.35652	117.333	45.8868	98.881	3
968	4.01739	117.333	45.9799	98.663	3
969	12.8348	117.333	46.9012	92.097	3
970	14.3652	117.333	47.0462	91.118	3
971	15.7043	117.333	47.166	90.443	3
972	20.1043	117.333	47.6354	87.801	3
973	32.1739	117.333	48.8982	81.535	3
974	32.1739	117.333	48.9169	81.392	3
975	50.4174	117.333	50.8569	74.308	3
976	1.0087	128	45.7374	100.237	3
977	1.54783	128	45.7735	99.944	3
978	1.91304	128	45.7919	99.944	3
979	2.10435	128	45.8154	100	3
980	2.41739	128	45.8776	99.46	3
981	2.62609	128	45.8903	99.215	3
982	3.23478	128	45.9622	98.808	3
983	3.35652	128	45.9359	98.551	3
984	4.01739	128	46.0378	98.149	3
985	12.8348	128	47.2726	89.801	3
986	14.3652	128	47.4878	88.143	3
987	15.7043	128	47.6687	86.799	3
988	20.1043	128	48.2623	83.84	3
989	32.1739	128	49.9594	75.351	3
990	32.1739	128	49.9942	75.525	3
991	50.4174	128	52.4849	66.19	3
992	1.0087	138.667	45.7022	100.801	3
993	1.54783	138.667	45.7788	100.445	3
994	1.91304	138.667	45.8318	99.594	3
995	2.10435	138.667	45.8768	99.681	3
996	2.41739	138.667	45.9203	99.034	3
997	2.62609	138.667	45.953	98.68	3
998	3.23478	138.667	46.0418	98.106	3
999	3.35652	138.667	46.0081	98.304	3
1000	4.01739	138.667	46.1438	97.515	3
1001	12.8348	138.667	47.6037	87.226	3
1002	14.3652	138.667	47.8561	85.901	3
1003	15.7043	138.667	48.0609	84.262	3
1004	20.1043	138.667	48.7996	80.193	3
1005	32.1739	138.667	50.8262	70.581	3
1006	32.1739	138.667	50.8631	70.454	3
1007	50.4174	138.667	53.9092	59.704	3
1008	1.0087	149.333	45.7119	100.585	3
1009	1.54783	149.333	45.8247	100.111	3
1010	1.91304	149.333	45.9091	99.205	3
1011	2.10435	149.333	45.9347	99.139	3
1012	2.41739	149.333	45.9922	98.662	3
1013	2.62609	149.333	46.011	98.387	3
1014	3.23478	149.333	46.1415	97.524	3
1015	3.35652	149.333	46.1799	97.203	3
1016	4.01739	149.333	46.317	96.18	3
1017	12.8348	149.333	48.0784	84.05	3
1018	14.3652	149.333	48.3625	82.413	3
1019	15.7043	149.333	48.6478	80.823	3
1020	20.1043	149.333	49.491	75.895	3
1021	32.1739	149.333	51.8864	64.88	3
1022	32.1739	149.333	51.8573	64.902	3
1023	50.4174	149.333	55.4967	52.922	3
1024	1.0087	160	45.7847	100.043	3
1025	1.54783	160	45.87	99.396	3
1026	1.91304	160	45.9652	98.81	3
1027	2.10435	160	45.9699	98.628	3
1028	2.41739	160	46.1141	97.689	3
1029	2.62609	160	46.121	97.399	3
1030	3.23478	160	46.2692	96.446	3
1031	3.35652	160	46.318	96.184	3
1032	4.01739	160	46.4798	95.076	3
1033	12.8348	160	48.4929	81.314	3
1034	14.3652	160	48.8367	79.086	3
1035	15.7043	160	49.1212	77.452	3
1036	20.1043	160	50.1338	71.92	3
1037	32.1739	160	52.8804	59.256	3
1038	32.1739	160	52.8908	59.119	3
1039	50.4174	160	57.0389	45.901	3
1040	1.47826	0	45.2024	84.286	4
1041	1.47826	0	45.1641	84.624	4
1042	1.47826	0	45.1798	84.485	4
1043	1.47826	0	45.1509	84.563	4
1044	1.91304	0	45.0314	85.281	4
1045	3.09565	0	44.8023	87.42	4
1046	3.35652	0	44.723	87.867	4
1047	3.53043	0	44.685	88.32	4
1048	4.33043	0	44.5272	89.623	4
1049	5.26957	0	44.309	91.332	4
1050	6.03478	0	44.1171	92.63	4
1051	7.89565	0	43.7054	95.486	4
1052	9.63478	0	43.3148	98.59	4
1053	12.8348	0	42.6138	103.404	4
1054	14.3652	0	42.292	105.58	4
1055	15.4783	0	42.0345	107.14	4
1056	17.913	0	41.4288	110.968	4
1057	17.913	0	41.4519	110.914	4
1058	20.1043	0	40.9258	113.869	4
1059	50.4174	0	34.0456	146.68	4
1060	1.47826	10.6667	45.2083	84.258	4
1061	1.47826	10.6667	45.2215	83.975	4
1062	1.47826	10.6667	45.19	84.442	4
1063	1.47826	10.6667	45.216	84.208	4
1064	1.91304	10.6667	45.1548	84.68	4
1065	3.09565	10.6667	44.9086	86.567	4
1066	3.35652	10.6667	44.8484	86.945	4
1067	3.53043	10.6667	44.8361	87.297	4
1068	4.33043	10.6667	44.6386	88.471	4
1069	5.26957	10.6667	44.4599	89.881	4
1070	6.03478	10.6667	44.3099	91.226	4
1071	7.89565	10.6667	43.9658	93.75	4
1072	9.63478	10.6667	43.6291	96.229	4
1073	12.8348	10.6667	42.9322	101.043	4
1074	14.3652	10.6667	42.6515	102.993	4
1075	15.4783	10.6667	42.4221	104.262	4
1076	17.913	10.6667	41.9528	107.264	4
1077	17.913	10.6667	41.9578	107.209	4
1078	20.1043	10.6667	41.5271	109.684	4
1079	50.4174	10.6667	35.5581	137.631	4
1080	1.47826	21.3333	45.2781	83.575	4
1081	1.47826	21.3333	45.2832	83.829	4
1082	1.47826	21.3333	45.2831	83.915	4
1083	1.47826	21.3333	45.28	83.789	4
1084	1.91304	21.3333	45.2127	84.214	4
1085	3.09565	21.3333	45.0056	85.771	4
1086	3.35652	21.3333	44.9748	85.907	4
1087	3.53043	21.3333	44.9471	86.183	4
1088	4.33043	21.3333	44.8103	87.348	4
1089	5.26957	21.3333	44.6367	88.769	4
1090	6.03478	21.3333	44.5128	89.455	4
1091	7.89565	21.3333	44.2012	91.87	4
1092	9.63478	21.3333	43.9202	93.659	4
1093	12.8348	21.3333	43.3797	97.48	4
1094	14.3652	21.3333	43.1288	99.494	4
1095	15.4783	21.3333	42.9511	100.584	4
1096	17.913	21.3333	42.5345	102.97	4
1097	17.913	21.3333	42.5337	103.258	4
1098	20.1043	21.3333	42.1677	105.364	4
1099	50.4174	21.3333	37.091	128.973	4
1100	1.47826	32	45.2833	83.705	4
1101	1.47826	32	45.3042	83.632	4
1102	1.47826	32	45.2818	83.215	4
1103	1.47826	32	45.3034	83.377	4
1104	1.91304	32	45.2327	83.994	4
1105	3.09565	32	45.0779	85.252	4
1106	3.35652	32	45.0317	85.465	4
1107	3.53043	32	45.0036	85.572	4
1108	4.33043	32	44.9148	86.536	4
1109	5.26957	32	44.8106	87.205	4
1110	6.03478	32	44.678	88.073	4
1111	7.89565	32	44.4039	90.322	4
1112	9.63478	32	44.1811	91.876	4
1113	12.8348	32	43.7351	95.01	4
1114	14.3652	32	43.5032	96.58	4
1115	15.4783	32	43.3673	97.646	4
1116	17.913	32	43.0225	99.565	4
1117	17.913	32	43.0342	99.507	4
1118	20.1043	32	42.7354	101.051	4
1119	50.4174	32	38.609	120.091	4
1120	1.47826	42.6667	45.3551	83.175	4
1121	1.47826	42.6667	45.3663	82.817	4
1122	1.47826	42.6667	45.3563	83.186	4
1123	1.47826	42.6667	45.3483	83.216	4
1124	1.91304	42.6667	45.3116	82.961	4
1125	3.09565	42.6667	45.1916	84.323	4
1126	3.35652	42.6667	45.1558	84.239	4
1127	3.53043	42.6667	45.1432	84.794	4
1128	4.33043	42.6667	45.0693	85.2	4
1129	5.26957	42.6667	44.9519	86.396	4
1130	6.03478	42.6667	44.89	86.648	4
1131	7.89565	42.6667	44.66	88.465	4
1132	9.63478	42.6667	44.4876	89.601	4
1133	12.8348	42.6667	44.1872	91.743	4
1134	14.3652	42.6667	44.0163	92.78	4
1135	15.4783	42.6667	43.8788	93.774	4
1136	17.913	42.6667	43.648	95.093	4
1137	17.913	42.6667	43.611	95.121	4
1138	20.1043	42.6667	43.3829	96.617	4
1139	50.4174	42.6667	40.1661	110.981	4
1140	1.47826	53.3333	45.3779	82.746	4
1141	1.47826	53.3333	45.3788	82.853	4
1142	1.47826	53.3333	45.3464	83.094	4
1143	1.47826	53.3333	45.3668	83.04	4
1144	1.91304	53.3333	45.367	82.781	4
1145	3.09565	53.3333	45.2744	83.604	4
1146	3.35652	53.3333	45.2592	83.478	4
1147	3.53043	53.3333	45.2392	83.782	4
1148	4.33043	53.3333	45.163	84.627	4
1149	5.26957	53.3333	45.0837	85.247	4
1150	6.03478	53.3333	45.0416	85.527	4
1151	7.89565	53.3333	44.9198	86.625	4
1152	9.63478	53.3333	44.7695	87.533	4
1153	12.8348	53.3333	44.4828	89.129	4
1154	14.3652	53.3333	44.3955	89.604	4
1155	15.4783	53.3333	44.3171	90.18	4
1156	17.913	53.3333	44.1309	91.418	4
1157	17.913	53.3333	44.1567	91.388	4
1158	20.1043	53.3333	43.9796	92.468	4
1159	50.4174	53.3333	41.6567	103.045	4
1160	1.47826	64	45.4728	82.379	4
1161	1.47826	64	45.4751	82.194	4
1162	1.47826	64	45.4793	82.105	4
1163	1.47826	64	45.4723	82.226	4
1164	1.91304	64	45.4646	82.355	4
1165	3.09565	64	45.3783	82.921	4
1166	3.35652	64	45.3724	82.982	4
1167	3.53043	64	45.3584	83.209	4
1168	4.33043	64	45.3122	83.411	4
1169	5.26957	64	45.2702	84.132	4
1170	6.03478	64	45.1919	84.17	4
1171	7.89565	64	45.1355	84.654	4
1172	9.63478	64	45.059	85.228	4
1173	12.8348	64	44.9074	86.057	4
1174	14.3652	64	44.8357	86.44	4
1175	15.4783	64	44.8008	86.856	4
1176	17.913	64	44.7135	87.441	4
1177	17.913	64	44.6809	87.432	4
1178	20.1043	64	44.618	88.247	4
1179	50.4174	64	43.252	94.071	4
1180	1.47826	74.6667	45.5055	81.939	4
1181	1.47826	74.6667	45.4867	82.039	4
1182	1.47826	74.6667	45.4991	81.833	4
1183	1.47826	74.6667	45.4672	81.934	4
1184	1.91304	74.6667	45.4939	81.704	4
1185	3.09565	74.6667	45.4516	82.342	4
1186	3.35652	74.6667	45.4736	82.261	4
1187	3.53043	74.6667	45.4414	82.388	4
1188	4.33043	74.6667	45.4481	82.544	4
1189	5.26957	74.6667	45.4307	82.643	4
1190	6.03478	74.6667	45.4458	82.6	4
1191	7.89565	74.6667	45.4107	83.097	4
1192	9.63478	74.6667	45.3537	83.18	4
1193	12.8348	74.6667	45.3024	83.373	4
1194	14.3652	74.6667	45.2936	83.501	4
1195	15.4783	74.6667	45.2795	83.624	4
1196	17.913	74.6667	45.2036	83.849	4
1197	17.913	74.6667	45.2269	83.7	4
1198	20.1043	74.6667	45.2273	83.668	4
1199	50.4174	74.6667	44.7304	85.98	4
1200	1.47826	85.3333	45.5593	81.402	4
1201	1.47826	85.3333	45.5235	81.403	4
1202	1.47826	85.3333	45.5555	81.445	4
1203	1.47826	85.3333	45.5222	81.818	4
1204	1.91304	85.3333	45.5224	81.717	4
1205	3.09565	85.3333	45.5349	81.678	4
1206	3.35652	85.3333	45.5381	81.767	4
1207	3.53043	85.3333	45.5653	81.33	4
1208	4.33043	85.3333	45.5494	81.649	4
1209	5.26957	85.3333	45.5779	81.262	4
1210	6.03478	85.3333	45.6225	81.295	4
1211	7.89565	85.3333	45.6487	80.82	4
1212	9.63478	85.3333	45.6644	80.739	4
1213	12.8348	85.3333	45.6939	80.746	4
1214	14.3652	85.3333	45.7195	80.644	4
1215	15.4783	85.3333	45.7329	80.244	4
1216	17.913	85.3333	45.781	79.65	4
1217	17.913	85.3333	45.7811	79.704	4
1218	20.1043	85.3333	45.8106	79.8	4
1219	50.4174	85.3333	46.2766	77.78	4
1220	1.47826	96	45.5583	81.661	4
1221	1.47826	96	45.5805	81.414	4
1222	1.47826	96	45.5896	81.395	4
1223	1.47826	96	45.5725	81.327	4
1224	1.91304	96	45.5737	81.137	4
1225	3.09565	96	45.6495	80.643	4
1226	3.35652	96	45.6861	80.684	4
1227	3.53043	96	45.6905	80.573	4
1228	4.33043	96	45.7241	80.197	4
1229	5.26957	96	45.7654	79.842	4
1230	6.03478	96	45.7998	79.542	4
1231	7.89565	96	45.8807	79.11	4
1232	9.63478	96	45.9444	78.722	4
1233	12.8348	96	46.0717	77.798	4
1234	14.3652	96	46.156	77.234	4
1235	15.4783	96	46.1839	77	4
1236	17.913	96	46.3023	76.515	4
1237	17.913	96	46.3034	76.402	4
1238	20.1043	96	46.3927	75.941	4
1239	50.4174	96	47.7801	70.28	4
1240	1.47826	106.667	45.6402	81.106	4
1241	1.47826	106.667	45.6414	80.853	4
1242	1.47826	106.667	45.654	80.531	4
1243	1.47826	106.667	45.6464	80.706	4
1244	1.91304	106.667	45.6877	80.294	4
1245	3.09565	106.667	45.7776	79.927	4
1246	3.35652	106.667	45.7814	79.506	4
1247	3.53043	106.667	45.8012	79.759	4
1248	4.33043	106.667	45.8747	79.09	4
1249	5.26957	106.667	45.945	78.483	4
1250	6.03478	106.667	45.9695	78.39	4
1251	7.89565	106.667	46.1424	76.983	4
1252	9.63478	106.667	46.2756	76.426	4
1253	12.8348	106.667	46.5144	74.693	4
1254	14.3652	106.667	46.6408	74.185	4
1255	15.4783	106.667	46.6901	73.532	4
1256	17.913	106.667	46.8782	72.53	4
1257	17.913	106.667	46.907	72.154	4
1258	20.1043	106.667	47.0636	71.5	4
1259	50.4174	106.667	49.3765	62.635	4
1260	1.47826	117.333	45.685	80.846	4
1261	1.47826	117.333	45.7016	80.529	4
1262	1.47826	117.333	45.731	80.421	4
1263	1.47826	117.333	45.7111	80.558	4
1264	1.91304	117.333	45.7474	80.036	4
1265	3.09565	117.333	45.8484	79.31	4
1266	3.35652	117.333	45.8858	79.102	4
1267	3.53043	117.333	45.9134	79.052	4
1268	4.33043	117.333	45.9704	78.637	4
1269	5.26957	117.333	46.0767	77.827	4
1270	6.03478	117.333	46.1669	77.006	4
1271	7.89565	117.333	46.3744	75.585	4
1272	9.63478	117.333	46.5213	74.437	4
1273	12.8348	117.333	46.8673	72.282	4
1274	14.3652	117.333	47.0385	71.289	4
1275	15.4783	117.333	47.1298	70.602	4
1276	17.913	117.333	47.4169	69.016	4
1277	17.913	117.333	47.4147	69.275	4
1278	20.1043	117.333	47.6332	67.994	4
1279	50.4174	117.333	50.8827	55.879	4
1280	1.47826	128	45.7331	80.117	4
1281	1.47826	128	45.7002	80.174	4
1282	1.47826	128	45.7185	80.289	4
1283	1.47826	128	45.7174	80.026	4
1284	1.91304	128	45.8098	79.357	4
1285	3.09565	128	45.985	78.336	4
1286	3.35652	128	46.0062	78.146	4
1287	3.53043	128	46.0317	77.974	4
1288	4.33043	128	46.1518	77.114	4
1289	5.26957	128	46.2764	76.148	4
1290	6.03478	128	46.3805	75.423	4
1291	7.89565	128	46.6466	73.356	4
1292	9.63478	128	46.876	71.852	4
1293	12.8348	128	47.3087	69.192	4
1294	14.3652	128	47.5093	68.03	4
1295	15.4783	128	47.6352	67.379	4
1296	17.913	128	47.9654	65.384	4
1297	17.913	128	47.9657	65.345	4
1298	20.1043	128	48.2681	63.785	4
1299	50.4174	128	52.3988	48.957	4
1300	1.47826	138.667	45.7822	79.839	4
1301	1.47826	138.667	45.7601	79.653	4
1302	1.47826	138.667	45.7863	79.76	4
1303	1.47826	138.667	45.7946	79.584	4
1304	1.91304	138.667	45.8293	79.385	4
1305	3.09565	138.667	46.0778	77.656	4
1306	3.35652	138.667	46.0969	77.209	4
1307	3.53043	138.667	46.0926	77.417	4
1308	4.33043	138.667	46.2368	76.237	4
1309	5.26957	138.667	46.4046	75.024	4
1310	6.03478	138.667	46.5262	74.368	4
1311	7.89565	138.667	46.8242	71.895	4
1312	9.63478	138.667	47.1326	70.148	4
1313	12.8348	138.667	47.6678	66.571	4
1314	14.3652	138.667	47.9433	65.087	4
1315	15.4783	138.667	48.1225	63.714	4
1316	17.913	138.667	48.505	61.819	4
1317	17.913	138.667	48.5234	61.526	4
1318	20.1043	138.667	48.8829	59.62	4
1319	50.4174	138.667	53.985	42.795	4
1320	1.47826	149.333	45.8054	79.605	4
1321	1.47826	149.333	45.8106	79.484	4
1322	1.47826	149.333	45.7787	79.736	4
1323	1.47826	149.333	45.7677	79.63	4
1324	1.91304	149.333	45.8459	79.146	4
1325	3.09565	149.333	46.0926	77.304	4
1326	3.35652	149.333	46.1346	76.967	4
1327	3.53043	149.333	46.1849	76.591	4
1328	4.33043	149.333	46.3153	75.73	4
1329	5.26957	149.333	46.5235	74.258	4
1330	6.03478	149.333	46.6844	73.015	4
1331	7.89565	149.333	47.0369	70.347	4
1332	9.63478	149.333	47.3749	68.212	4
1333	12.8348	149.333	48.0057	64.302	4
1334	14.3652	149.333	48.3266	62.006	4
1335	15.4783	149.333	48.548	60.848	4
1336	17.913	149.333	49.0271	58.117	4
1337	17.913	149.333	49.0312	58.287	4
1338	20.1043	149.333	49.4364	56.442	4
1339	50.4174	149.333	55.4795	36.793	4
1340	1.47826	160	45.8977	79.004	4
1341	1.47826	160	45.8517	79.146	4
1342	1.47826	160	45.8592	79.15	4
1343	1.47826	160	45.8911	79.27	4
1344	1.91304	160	45.9771	78.303	4
1345	3.09565	160	46.2214	76.675	4
1346	3.35652	160	46.3045	75.887	4
1347	3.53043	160	46.3255	75.763	4
1348	4.33043	160	46.4961	74.477	4
1349	5.26957	160	46.7178	72.646	4
1350	6.03478	160	46.8964	71.637	4
1351	7.89565	160	47.3412	68.32	4
1352	9.63478	160	47.7181	66.085	4
1353	12.8348	160	48.4518	61.214	4
1354	14.3652	160	48.7986	59.176	4
1355	15.4783	160	49.0296	57.965	4
1356	17.913	160	49.6039	54.993	4
1357	17.913	160	49.579	55.099	4
1358	20.1043	160	50.0947	52.684	4
1359	50.4174	160	56.9798	31.482	4
1360	0.0521739	0	45.4865	57.397	5
1361	0.53913	0	45.3756	58.029	5
1362	0.956522	0	45.273	58.795	5
1363	0.956522	0	45.2685	58.754	5
1364	1.13043	0	45.2334	59.234	5
1365	1.32174	0	45.206	59.369	5
1366	1.32174	0	45.1763	59.446	5
1367	1.63478	0	45.1207	59.94	5
1368	2.10435	0	45.0267	60.683	5
1369	2.53913	0	44.9274	61.459	5
1370	2.76522	0	44.8596	62.059	5
1371	3.2	0	44.7828	62.54	5
1372	4.12174	0	44.5768	63.847	5
1373	4.2087	0	44.5514	64.203	5
1374	4.33043	0	44.517	64.411	5
1375	5.25217	0	44.3065	65.74	5
1376	5.25217	0	44.3382	65.855	5
1377	6.81739	0	43.9739	68.242	5
1378	7.02609	0	43.9223	68.807	5
1379	7.89565	0	43.7277	69.995	5
1380	7.96522	0	43.6989	70.142	5
1381	9.93043	0	43.261	72.928	5
1382	11.687	0	42.8218	75.784	5
1383	12.8348	0	42.592	77.259	5
1384	13.0609	0	42.531	77.447	5
1385	13.0609	0	42.5183	77.604	5
1386	15.3913	0	41.9989	80.529	5
1387	15.3913	0	41.988	80.82	5
1388	37.2522	0	37.0217	102.908	5
1389	0.0521739	10.6667	45.5137	56.933	5
1390	0.53913	10.6667	45.3926	57.653	5
1391	0.956522	10.6667	45.3434	58.092	5
1392	0.956522	10.6667	45.3295	58.132	5
1393	1.13043	10.6667	45.2765	58.782	5
1394	1.32174	10.6667	45.2371	58.806	5
1395	1.32174	10.6667	45.2433	59.039	5
1396	1.63478	10.6667	45.1807	59.644	5
1397	2.10435	10.6667	45.0926	60.026	5
1398	2.53913	10.6667	45.0205	60.45	5
1399	2.76522	10.6667	44.9745	60.685	5
1400	3.2	10.6667	44.8745	61.552	5
1401	4.12174	10.6667	44.7214	62.651	5
1402	4.2087	10.6667	44.7124	62.785	5
1403	4.33043	10.6667	44.6514	63.169	5
1404	5.25217	10.6667	44.4722	64.633	5
1405	5.25217	10.6667	44.4978	64.409	5
1406	6.81739	10.6667	44.204	66.556	5
1407	7.02609	10.6667	44.1467	66.927	5
1408	7.89565	10.6667	43.9823	68.01	5
1409	7.96522	10.6667	43.9334	68.045	5
1410	9.93043	10.6667	43.5528	70.67	5
1411	11.687	10.6667	43.2186	72.884	5
1412	12.8348	10.6667	42.9824	74.2	5
1413	13.0609	10.6667	42.9531	74.479	5
1414	13.0609	10.6667	42.9237	74.503	5
1415	15.3913	10.6667	42.448	77.424	5
1416	15.3913	10.6667	42.4651	77.16	5
1417	37.2522	10.6667	38.169	96.425	5
1418	0.0521739	21.3333	45.4977	57.123	5
1419	0.53913	21.3333	45.3971	57.881	5
1420	0.956522	21.3333	45.3534	58.357	5
1421	0.956522	21.3333	45.3486	58.422	5
1422	1.13043	21.3333	45.309	58.699	5
1423	1.32174	21.3333	45.2844	58.728	5
1424	1.32174	21.3333	45.2904	58.634	5
1425	1.63478	21.3333	45.2656	58.796	5
1426	2.10435	21.3333	45.1709	59.427	5
1427	2.53913	21.3333	45.1099	59.92	5
1428	2.76522	21.3333	45.0824	60.021	5
1429	3.2	21.3333	45.0088	60.59	5
1430	4.12174	21.3333	44.8439	61.914	5
1431	4.2087	21.3333	44.8024	62.001	5
1432	4.33043	21.3333	44.777	62.146	5
1433	5.25217	21.3333	44.6369	63.151	5
1434	5.25217	21.3333	44.6311	63.314	5
1435	6.81739	21.3333	44.3688	65.162	5
1436	7.02609	21.3333	44.319	65.758	5
1437	7.89565	21.3333	44.1748	66.701	5
1438	7.96522	21.3333	44.1912	66.401	5
1439	9.93043	21.3333	43.8225	68.85	5
1440	11.687	21.3333	43.5246	70.702	5
1441	12.8348	21.3333	43.3566	71.705	5
1442	13.0609	21.3333	43.3093	71.882	5
1443	13.0609	21.3333	43.3096	71.934	5
1444	15.3913	21.3333	42.9271	74.099	5
1445	15.3913	21.3333	42.9468	74.005	5
1446	37.2522	21.3333	39.2839	90.226	5
1447	0.0521739	32	45.5609	56.617	5
1448	0.53913	32	45.4576	57.168	5
1449	0.956522	32	45.4005	57.77	5
1450	0.956522	32	45.4164	57.559	5
1451	1.13043	32	45.393	57.79	5
1452	1.32174	32	45.3424	58.165	5
1453	1.32174	32	45.333	58.535	5
1454	1.63478	32	45.3043	58.541	5
1455	2.10435	32	45.2361	58.894	5
1456	2.53913	32	45.1806	59.588	5
1457	2.76522	32	45.1359	59.884	5
1458	3.2	32	45.0826	60.153	5
1459	4.12174	32	44.9434	61.106	5
1460	4.2087	32	44.9538	61.185	5
1461	4.33043	32	44.961	61.165	5
1462	5.25217	32	44.8169	61.999	5
1463	5.25217	32	44.8212	62.065	5
1464	6.81739	32	44.6229	63.496	5
1465	7.02609	32	44.5987	63.618	5
1466	7.89565	32	44.4565	64.424	5
1467	7.96522	32	44.4528	64.654	5
1468	9.93043	32	44.1857	66.335	5
1469	11.687	32	43.9623	67.749	5
1470	12.8348	32	43.7864	68.706	5
1471	13.0609	32	43.7784	68.822	5
1472	13.0609	32	43.76	68.906	5
1473	15.3913	32	43.4613	70.509	5
1474	15.3913	32	43.4703	70.414	5
1475	37.2522	32	40.4538	83.63	5
1476	0.0521739	42.6667	45.5124	57.169	5
1477	0.53913	42.6667	45.4403	57.723	5
1478	0.956522	42.6667	45.3926	57.902	5
1479	0.956522	42.6667	45.3971	57.974	5
1480	1.13043	42.6667	45.404	57.856	5
1481	1.32174	42.6667	45.3734	58.155	5
1482	1.32174	42.6667	45.3699	57.962	5
1483	1.63478	42.6667	45.3213	58.612	5
1484	2.10435	42.6667	45.2595	58.991	5
1485	2.53913	42.6667	45.2207	59.544	5
1486	2.76522	42.6667	45.1846	59.676	5
1487	3.2	42.6667	45.1403	59.807	5
1488	4.12174	42.6667	45.0535	60.505	5
1489	4.2087	42.6667	45.0492	60.342	5
1490	4.33043	42.6667	45.0168	60.807	5
1491	5.25217	42.6667	44.9345	61.127	5
1492	5.25217	42.6667	44.9203	61.222	5
1493	6.81739	42.6667	44.7695	62.31	5
1494	7.02609	42.6667	44.7498	62.483	5
1495	7.89565	42.6667	44.6663	62.84	5
1496	7.96522	42.6667	44.637	62.991	5
1497	9.93043	42.6667	44.4651	64.285	5
1498	11.687	42.6667	44.2432	65.65	5
1499	12.8348	42.6667	44.1447	66.182	5
1500	13.0609	42.6667	44.0987	66.423	5
1501	13.0609	42.6667	44.1223	66.328	5
1502	15.3913	42.6667	43.844	67.733	5
1503	15.3913	42.6667	43.8538	67.994	5
1504	37.2522	42.6667	41.559	77.676	5
1505	0.0521739	53.3333	45.5059	56.979	5
1506	0.53913	53.3333	45.4432	57.508	5
1507	0.956522	53.3333	45.4223	57.792	5
1508	0.956522	53.3333	45.4344	57.594	5
1509	1.13043	53.3333	45.4337	57.336	5
1510	1.32174	53.3333	45.4109	57.769	5
1511	1.32174	53.3333	45.3868	57.947	5
1512	1.63478	53.3333	45.379	57.884	5
1513	2.10435	53.3333	45.3359	58.16	5
1514	2.53913	53.3333	45.3184	58.336	5
1515	2.76522	53.3333	45.2767	58.365	5
1516	3.2	53.3333	45.2576	58.49	5
1517	4.12174	53.3333	45.182	58.92	5
1518	4.2087	53.3333	45.1835	59.224	5
1519	4.33043	53.3333	45.1673	59.36	5
1520	5.25217	53.3333	45.0904	59.883	5
1521	5.25217	53.3333	45.1119	59.923	5
1522	6.81739	53.3333	45.0028	60.752	5
1523	7.02609	53.3333	44.9778	60.817	5
1524	7.89565	53.3333	44.913	61.251	5
1525	7.96522	53.3333	44.9298	61.046	5
1526	9.93043	53.3333	44.7776	62.166	5
1527	11.687	53.3333	44.6161	62.739	5
1528	12.8348	53.3333	44.5492	63.338	5
1529	13.0609	53.3333	44.5001	63.572	5
1530	13.0609	53.3333	44.5386	63.47	5
1531	15.3913	53.3333	44.3606	64.441	5
1532	15.3913	53.3333	44.3484	64.44	5
1533	37.2522	53.3333	42.6836	71.68	5
1534	0.0521739	64	45.5343	56.597	5
1535	0.53913	64	45.5062	57.044	5
1536	0.956522	64	45.4721	57.353	5
1537	0.956522	64	45.4947	56.901	5
1538	1.13043	64	45.4749	57.089	5
1539	1.32174	64	45.4771	57.277	5
1540	1.32174	64	45.4667	57.158	5
1541	1.63478	64	45.4639	56.953	5
1542	2.10435	64	45.4375	57.159	5
1543	2.53913	64	45.4241	57.405	5
1544	2.76522	64	45.3994	57.827	5
1545	3.2	64	45.3839	57.882	5
1546	4.12174	64	45.3267	58.214	5
1547	4.2087	64	45.3123	58.142	5
1548	4.33043	64	45.3251	58.276	5
1549	5.25217	64	45.3013	58.527	5
1550	5.25217	64	45.293	58.718	5
1551	6.81739	64	45.232	58.869	5
1552	7.02609	64	45.2222	58.998	5
1553	7.89565	64	45.1714	59.428	5
1554	7.96522	64	45.1702	59.419	5
1555	9.93043	64	45.1049	59.499	5
1556	11.687	64	45.007	60.418	5
1557	12.8348	64	44.9606	60.571	5
1558	13.0609	64	44.937	60.666	5
1559	13.0609	64	44.9264	60.599	5
1560	15.3913	64	44.8192	61.332	5
1561	15.3913	64	44.829	61.233	5
1562	37.2522	64	43.8379	65.33	5
1563	0.0521739	74.6667	45.505	57.063	5
1564	0.53913	74.6667	45.4817	57.101	5
1565	0.956522	74.6667	45.4632	57.378	5
1566	0.956522	74.6667	45.4757	57.093	5
1567	1.13043	74.6667	45.4667	57.171	5
1568	1.32174	74.6667	45.481	56.948	5
1569	1.32174	74.6667	45.4662	57.04	5
1570	1.63478	74.6667	45.4656	57.338	5
1571	2.10435	74.6667	45.4679	57.318	5
1572	2.53913	74.6667	45.4514	57.326	5
1573	2.76522	74.6667	45.4651	57.138	5
1574	3.2	74.6667	45.4499	57.26	5
1575	4.12174	74.6667	45.4456	57.553	5
1576	4.2087	74.6667	45.4307	57.45	5
1577	4.33043	74.6667	45.4456	57.401	5
1578	5.25217	74.6667	45.4151	57.56	5
1579	5.25217	74.6667	45.4301	57.56	5
1580	6.81739	74.6667	45.4001	57.871	5
1581	7.02609	74.6667	45.3978	58.036	5
1582	7.89565	74.6667	45.3757	57.936	5
1583	7.96522	74.6667	45.3738	57.805	5
1584	9.93043	74.6667	45.3491	57.993	5
1585	11.687	74.6667	45.3097	58.445	5
1586	12.8348	74.6667	45.2948	58.345	5
1587	13.0609	74.6667	45.2899	58.254	5
1588	13.0609	74.6667	45.2779	58.398	5
1589	15.3913	74.6667	45.2381	58.623	5
1590	15.3913	74.6667	45.2851	58.701	5
1591	37.2522	74.6667	44.9381	59.896	5
1592	0.0521739	85.3333	45.5293	56.737	5
1593	0.53913	85.3333	45.5466	56.757	5
1594	0.956522	85.3333	45.5532	56.667	5
1595	0.956522	85.3333	45.5463	56.577	5
1596	1.13043	85.3333	45.5356	56.724	5
1597	1.32174	85.3333	45.5361	56.759	5
1598	1.32174	85.3333	45.5335	56.67	5
1599	1.63478	85.3333	45.5408	56.693	5
1600	2.10435	85.3333	45.5354	56.877	5
1601	2.53913	85.3333	45.5337	56.732	5
1602	2.76522	85.3333	45.5239	56.556	5
1603	3.2	85.3333	45.5473	56.594	5
1604	4.12174	85.3333	45.5503	56.684	5
1605	4.2087	85.3333	45.5582	56.414	5
1606	4.33043	85.3333	45.5647	56.597	5
1607	5.25217	85.3333	45.5843	56.327	5
1608	5.25217	85.3333	45.5842	56.283	5
1609	6.81739	85.3333	45.6165	56.189	5
1610	7.02609	85.3333	45.6064	56.119	5
1611	7.89565	85.3333	45.6345	55.889	5
1612	7.96522	85.3333	45.6567	55.873	5
1613	9.93043	85.3333	45.6861	55.739	5
1614	11.687	85.3333	45.7026	55.824	5
1615	12.8348	85.3333	45.7225	55.638	5
1616	13.0609	85.3333	45.7283	55.484	5
1617	13.0609	85.3333	45.718	55.374	5
1618	15.3913	85.3333	45.7633	55.209	5
1619	15.3913	85.3333	45.7503	55.315	5
1620	37.2522	85.3333	46.1	53.992	5
1621	0.0521739	96	45.4985	57.148	5
1622	0.53913	96	45.5243	56.815	5
1623	0.956522	96	45.5479	56.732	5
1624	0.956522	96	45.5555	56.384	5
1625	1.13043	96	45.569	56.281	5
1626	1.32174	96	45.5698	56.507	5
1627	1.32174	96	45.5937	56.293	5
1628	1.63478	96	45.6067	56.331	5
1629	2.10435	96	45.6159	56.368	5
1630	2.53913	96	45.6516	55.856	5
1631	2.76522	96	45.6531	55.952	5
1632	3.2	96	45.6721	55.811	5
1633	4.12174	96	45.6976	55.676	5
1634	4.2087	96	45.6959	55.694	5
1635	4.33043	96	45.7103	55.404	5
1636	5.25217	96	45.7443	55.353	5
1637	5.25217	96	45.748	55.314	5
1638	6.81739	96	45.8082	54.858	5
1639	7.02609	96	45.8304	54.797	5
1640	7.89565	96	45.8766	54.608	5
1641	7.96522	96	45.8641	54.31	5
1642	9.93043	96	45.9718	53.724	5
1643	11.687	96	46.034	53.372	5
1644	12.8348	96	46.0799	53.142	5
1645	13.0609	96	46.1069	53.178	5
1646	13.0609	96	46.0874	53.143	5
1647	15.3913	96	46.1878	52.805	5
1648	15.3913	96	46.2078	52.588	5
1649	37.2522	96	47.183	49.279	5
1650	0.0521739	106.667	45.5179	56.979	5
1651	0.53913	106.667	45.5321	56.762	5
1652	0.956522	106.667	45.5722	56.604	5
1653	0.956522	106.667	45.5915	56.475	5
1654	1.13043	106.667	45.598	56.621	5
1655	1.32174	106.667	45.5867	56.52	5
1656	1.32174	106.667	45.5914	56.441	5
1657	1.63478	106.667	45.5972	56.47	5
1658	2.10435	106.667	45.6294	56.012	5
1659	2.53913	106.667	45.6884	55.819	5
1660	2.76522	106.667	45.7002	55.639	5
1661	3.2	106.667	45.7349	55.468	5
1662	4.12174	106.667	45.8324	54.8	5
1663	4.2087	106.667	45.8292	54.559	5
1664	4.33043	106.667	45.8222	54.419	5
1665	5.25217	106.667	45.9025	53.974	5
1666	5.25217	106.667	45.9125	53.891	5
1667	6.81739	106.667	46.0472	53.124	5
1668	7.02609	106.667	46.0599	53.122	5
1669	7.89565	106.667	46.1362	52.486	5
1670	7.96522	106.667	46.1035	52.819	5
1671	9.93043	106.667	46.2816	51.721	5
1672	11.687	106.667	46.3983	51.013	5
1673	12.8348	106.667	46.4831	50.69	5
1674	13.0609	106.667	46.5186	50.271	5
1675	13.0609	106.667	46.5093	50.397	5
1676	15.3913	106.667	46.7077	49.613	5
1677	15.3913	106.667	46.6981	49.616	5
1678	37.2522	106.667	48.3599	43.74	5
1679	0.0521739	117.333	45.5274	56.677	5
1680	0.53913	117.333	45.5802	56.667	5
1681	0.956522	117.333	45.5978	56.438	5
1682	0.956522	117.333	45.6237	56.323	5
1683	1.13043	117.333	45.6581	56.049	5
1684	1.32174	117.333	45.6612	56.065	5
1685	1.32174	117.333	45.6592	55.952	5
1686	1.63478	117.333	45.6734	55.784	5
1687	2.10435	117.333	45.7427	55.415	5
1688	2.53913	117.333	45.79	54.972	5
1689	2.76522	117.333	45.8065	54.769	5
1690	3.2	117.333	45.8618	54.44	5
1691	4.12174	117.333	45.9632	53.687	5
1692	4.2087	117.333	45.9783	53.508	5
1693	4.33043	117.333	45.9876	53.67	5
1694	5.25217	117.333	46.073	52.623	5
1695	5.25217	117.333	46.0994	52.755	5
1696	6.81739	117.333	46.2546	51.787	5
1697	7.02609	117.333	46.29	51.447	5
1698	7.89565	117.333	46.3762	50.93	5
1699	7.96522	117.333	46.3777	50.635	5
1700	9.93043	117.333	46.5872	49.719	5
1701	11.687	117.333	46.7961	48.454	5
1702	12.8348	117.333	46.9141	47.652	5
1703	13.0609	117.333	46.9358	47.793	5
1704	13.0609	117.333	46.915	48.012	5
1705	15.3913	117.333	47.1659	46.847	5
1706	15.3913	117.333	47.173	46.783	5
1707	37.2522	117.333	49.5071	38.718	5
1708	0.0521739	128	45.5363	56.967	5
1709	0.53913	128	45.6012	56.377	5
1710	0.956522	128	45.6618	56.082	5
1711	0.956522	128	45.6484	55.906	5
1712	1.13043	128	45.6807	55.605	5
1713	1.32174	128	45.7018	55.522	5
1714	1.32174	128	45.7162	55.426	5
1715	1.63478	128	45.77	55.022	5
1716	2.10435	128	45.8162	54.638	5
1717	2.53913	128	45.8877	54.194	5
1718	2.76522	128	45.9017	54.035	5
1719	3.2	128	45.9638	53.589	5
1720	4.12174	128	46.0952	52.754	5
1721	4.2087	128	46.1245	52.605	5
1722	4.33043	128	46.1357	52.74	5
1723	5.25217	128	46.2646	51.772	5
1724	5.25217	128	46.2481	51.8	5
1725	6.81739	128	46.4805	50.355	5
1726	7.02609	128	46.4926	49.996	5
1727	7.89565	128	46.6286	49.35	5
1728	7.96522	128	46.636	49.304	5
1729	9.93043	128	46.9113	47.452	5
1730	11.687	128	47.164	46.062	5
1731	12.8348	128	47.3112	45.171	5
1732	13.0609	128	47.3278	45.462	5
1733	13.0609	128	47.3211	45.496	5
1734	15.3913	128	47.6457	43.945	5
1735	15.3913	128	47.6577	43.841	5
1736	37.2522	128	50.6171	34.189	5
1737	0.0521739	138.667	45.5353	56.863	5
1738	0.53913	138.667	45.5946	56.233	5
1739	0.956522	138.667	45.6727	56.126	5
1740	0.956522	138.667	45.6393	56.015	5
1741	1.13043	138.667	45.7004	55.644	5
1742	1.32174	138.667	45.7282	55.477	5
1743	1.32174	138.667	45.7294	55.251	5
1744	1.63478	138.667	45.7993	54.732	5
1745	2.10435	138.667	45.8813	54.335	5
1746	2.53913	138.667	45.9411	54.131	5
1747	2.76522	138.667	45.9809	53.685	5
1748	3.2	138.667	46.0653	52.96	5
1749	4.12174	138.667	46.2324	51.861	5
1750	4.2087	138.667	46.2534	51.733	5
1751	4.33043	138.667	46.2441	51.638	5
1752	5.25217	138.667	46.4188	50.81	5
1753	5.25217	138.667	46.41	50.646	5
1754	6.81739	138.667	46.6819	48.969	5
1755	7.02609	138.667	46.7038	48.69	5
1756	7.89565	138.667	46.8489	47.873	5
1757	7.96522	138.667	46.841	47.861	5
1758	9.93043	138.667	47.2023	45.764	5
1759	11.687	138.667	47.4714	44.161	5
1760	12.8348	138.667	47.6999	43.193	5
1761	13.0609	138.667	47.7026	43.301	5
1762	13.0609	138.667	47.7147	43.163	5
1763	15.3913	138.667	48.1096	41.348	5
1764	15.3913	138.667	48.0997	41.348	5
1765	37.2522	138.667	51.7531	30.127	5
1766	0.0521739	149.333	45.565	56.477	5
1767	0.53913	149.333	45.6415	56.075	5
1768	0.956522	149.333	45.7173	55.402	5
1769	0.956522	149.333	45.7111	55.595	5
1770	1.13043	149.333	45.7434	55.235	5
1771	1.32174	149.333	45.7676	54.913	5
1772	1.32174	149.333	45.7958	54.875	5
1773	1.63478	149.333	45.8459	54.229	5
1774	2.10435	149.333	45.9318	53.685	5
1775	2.53913	149.333	45.9899	53.256	5
1776	2.76522	149.333	46.0537	52.857	5
1777	3.2	149.333	46.1287	52.416	5
1778	4.12174	149.333	46.3298	51.095	5
1779	4.2087	149.333	46.3451	50.826	5
1780	4.33043	149.333	46.3623	50.872	5
1781	5.25217	149.333	46.5536	49.506	5
1782	5.25217	149.333	46.5396	49.799	5
1783	6.81739	149.333	46.8573	47.825	5
1784	7.02609	149.333	46.8985	47.473	5
1785	7.89565	149.333	47.0775	46.121	5
1786	7.96522	149.333	47.0729	46.207	5
1787	9.93043	149.333	47.4501	44.02	5
1788	11.687	149.333	47.796	42.297	5
1789	12.8348	149.333	48.0441	40.844	5
1790	13.0609	149.333	48.0977	40.717	5
1791	13.0609	149.333	48.0731	40.742	5
1792	15.3913	149.333	48.5648	38.562	5
1793	15.3913	149.333	48.5814	38.511	5
1794	37.2522	149.333	52.8931	25.767	5
1795	0.0521739	160	45.5191	56.948	5
1796	0.53913	160	45.6268	55.971	5
1797	0.956522	160	45.7531	55.193	5
1798	0.956522	160	45.7007	55.518	5
1799	1.13043	160	45.7853	55.069	5
1800	1.32174	160	45.8132	54.707	5
1801	1.32174	160	45.8189	54.429	5
1802	1.63478	160	45.8945	54.088	5
1803	2.10435	160	46.0083	53.474	5
1804	2.53913	160	46.1061	52.944	5
1805	2.76522	160	46.1574	52.384	5
1806	3.2	160	46.2746	51.588	5
1807	4.12174	160	46.4567	50.14	5
1808	4.2087	160	46.478	50.227	5
1809	4.33043	160	46.4924	49.93	5
1810	5.25217	160	46.7121	48.786	5
1811	5.25217	160	46.704	48.904	5
1812	6.81739	160	47.0736	46.591	5
1813	7.02609	160	47.1156	46.01	5
1814	7.89565	160	47.3202	44.982	5
1815	7.96522	160	47.3283	44.694	5
1816	9.93043	160	47.7875	42.155	5
1817	11.687	160	48.1644	40.176	5
1818	12.8348	160	48.4354	38.766	5
1819	13.0609	160	48.5003	38.691	5
1820	13.0609	160	48.4841	38.575	5
1821	15.3913	160	49.0275	36.128	5
1822	15.3913	160	49.0289	35.896	5
1823	37.2522	160	54.0113	22.147	5
1824	1.13043	0	45.2819	61.583	6
1825	1.18261	0	45.2721	61.632	6
1826	1.42609	0	45.222	62.076	6
1827	1.63478	0	45.1529	62.377	6
1828	1.8087	0	45.12	62.772	6
1829	2.76522	0	44.893	64.489	6
1830	4.01739	0	44.6337	66.266	6
1831	4.2087	0	44.5787	66.491	6
1832	5.25217	0	44.3478	68.512	6
1833	5.89565	0	44.2072	69.45	6
1834	6.81739	0	43.9979	70.872	6
1835	7.02609	0	43.9417	71.136	6
1836	7.89565	0	43.7435	72.497	6
1837	7.96522	0	43.7181	72.493	6
1838	8.69565	0	43.5628	73.546	6
1839	8.69565	0	43.5396	73.729	6
1840	11.0435	0	43.0147	77.168	6
1841	13.0609	0	42.5427	80.029	6
1842	14.2435	0	42.2684	81.679	6
1843	14.3652	0	42.2503	81.917	6
1844	18.3826	0	41.3593	86.72	6
1845	18.3826	0	41.3457	86.621	6
1846	34.1043	0	37.7734	102.757	6
1847	1.13043	10.6667	45.2906	61.665	6
1848	1.18261	10.6667	45.2918	61.704	6
1849	1.42609	10.6667	45.2412	61.872	6
1850	1.63478	10.6667	45.2077	62.072	6
1851	1.8087	10.6667	45.1621	62.386	6
1852	2.76522	10.6667	44.9783	63.858	6
1853	4.01739	10.6667	44.7465	65.585	6
1854	4.2087	10.6667	44.7065	65.652	6
1855	5.25217	10.6667	44.5019	67.116	6
1856	5.89565	10.6667	44.3783	67.89	6
1857	6.81739	10.6667	44.2003	69.174	6
1858	7.02609	10.6667	44.1812	69.258	6
1859	7.89565	10.6667	43.9973	70.327	6
1860	7.96522	10.6667	43.9667	70.628	6
1861	8.69565	10.6667	43.8171	71.838	6
1862	8.69565	10.6667	43.8188	71.783	6
1863	11.0435	10.6667	43.3548	74.777	6
1864	13.0609	10.6667	42.9628	77.248	6
1865	14.2435	10.6667	42.7461	78.316	6
1866	14.3652	10.6667	42.6803	78.844	6
1867	18.3826	10.6667	41.8966	83.223	6
1868	18.3826	10.6667	41.886	83.167	6
1869	34.1043	10.6667	38.7961	97.107	6
1870	1.13043	21.3333	45.3356	61.107	6
1871	1.18261	21.3333	45.3215	61.049	6
1872	1.42609	21.3333	45.2828	61.548	6
1873	1.63478	21.3333	45.2304	62.044	6
1874	1.8087	21.3333	45.2082	62.075	6
1875	2.76522	21.3333	45.0627	62.932	6
1876	4.01739	21.3333	44.8435	64.704	6
1877	4.2087	21.3333	44.8167	64.74	6
1878	5.25217	21.3333	44.6385	66.026	6
1879	5.89565	21.3333	44.515	67.021	6
1880	6.81739	21.3333	44.3794	68.07	6
1881	7.02609	21.3333	44.3335	68.368	6
1882	7.89565	21.3333	44.192	69.418	6
1883	7.96522	21.3333	44.1567	69.297	6
1884	8.69565	21.3333	44.031	70.328	6
1885	8.69565	21.3333	44.0404	69.93	6
1886	11.0435	21.3333	43.6575	72.579	6
1887	13.0609	21.3333	43.3127	74.615	6
1888	14.2435	21.3333	43.1477	75.522	6
1889	14.3652	21.3333	43.1084	75.882	6
1890	18.3826	21.3333	42.4419	79.37	6
1891	18.3826	21.3333	42.4491	79.416	6
1892	34.1043	21.3333	39.845	90.845	6
1893	1.13043	32	45.3667	60.81	6
1894	1.18261	32	45.3667	60.663	6
1895	1.42609	32	45.3336	60.75	6
1896	1.63478	32	45.311	60.994	6
1897	1.8087	32	45.2901	61.09	6
1898	2.76522	32	45.1429	62.199	6
1899	4.01739	32	44.9837	63.356	6
1900	4.2087	32	44.9433	63.651	6
1901	5.25217	32	44.8242	64.625	6
1902	5.89565	32	44.7131	65.183	6
1903	6.81739	32	44.5971	65.972	6
1904	7.02609	32	44.5651	66.228	6
1905	7.89565	32	44.4361	67.211	6
1906	7.96522	32	44.4407	67.313	6
1907	8.69565	32	44.337	67.837	6
1908	8.69565	32	44.335	68.01	6
1909	11.0435	32	44.0062	69.798	6
1910	13.0609	32	43.7279	71.687	6
1911	14.2435	32	43.568	72.689	6
1912	14.3652	32	43.5686	72.64	6
1913	18.3826	32	43.0076	75.593	6
1914	18.3826	32	43.0037	75.212	6
1915	34.1043	32	40.8563	84.986	6
1916	1.13043	42.6667	45.4005	60.602	6
1917	1.18261	42.6667	45.3752	60.734	6
1918	1.42609	42.6667	45.3531	60.832	6
1919	1.63478	42.6667	45.3176	61.214	6
1920	1.8087	42.6667	45.2961	61.078	6
1921	2.76522	42.6667	45.1921	61.73	6
1922	4.01739	42.6667	45.0559	62.879	6
1923	4.2087	42.6667	45.0391	63.045	6
1924	5.25217	42.6667	44.9245	63.789	6
1925	5.89565	42.6667	44.8699	64.305	6
1926	6.81739	42.6667	44.7694	65.242	6
1927	7.02609	42.6667	44.7458	65.237	6
1928	7.89565	42.6667	44.6535	65.972	6
1929	7.96522	42.6667	44.6473	65.912	6
1930	8.69565	42.6667	44.5598	66.533	6
1931	8.69565	42.6667	44.5396	66.426	6
1932	11.0435	42.6667	44.3047	67.734	6
1933	13.0609	42.6667	44.0848	69.348	6
1934	14.2435	42.6667	43.9585	70.147	6
1935	14.3652	42.6667	43.9554	70.05	6
1936	18.3826	42.6667	43.5359	72.192	6
1937	18.3826	42.6667	43.5539	72.406	6
1938	34.1043	42.6667	41.8829	79.386	6
1939	1.13043	53.3333	45.4399	60.368	6
1940	1.18261	53.3333	45.4184	60.317	6
1941	1.42609	53.3333	45.4045	60.582	6
1942	1.63478	53.3333	45.3861	60.607	6
1943	1.8087	53.3333	45.386	60.417	6
1944	2.76522	53.3333	45.2992	61.231	6
1945	4.01739	53.3333	45.2257	61.78	6
1946	4.2087	53.3333	45.2092	61.827	6
1947	5.25217	53.3333	45.1141	62.711	6
1948	5.89565	53.3333	45.0598	62.942	6
1949	6.81739	53.3333	44.9966	63.6	6
1950	7.02609	53.3333	44.9729	63.761	6
1951	7.89565	53.3333	44.9142	64.211	6
1952	7.96522	53.3333	44.9086	64.002	6
1953	8.69565	53.3333	44.8473	64.533	6
1954	8.69565	53.3333	44.8526	64.522	6
1955	11.0435	53.3333	44.6849	65.504	6
1956	13.0609	53.3333	44.5455	66.493	6
1957	14.2435	53.3333	44.4464	66.95	6
1958	14.3652	53.3333	44.4357	67.229	6
1959	18.3826	53.3333	44.1211	68.614	6
1960	18.3826	53.3333	44.1237	68.699	6
1961	34.1043	53.3333	42.9315	73.702	6
1962	1.13043	64	45.4679	60.057	6
1963	1.18261	64	45.4652	59.989	6
1964	1.42609	64	45.4422	60.317	6
1965	1.63478	64	45.4247	60.494	6
1966	1.8087	64	45.4129	60.257	6
1967	2.76522	64	45.3938	60.545	6
1968	4.01739	64	45.3315	61.158	6
1969	4.2087	64	45.3071	61.213	6
1970	5.25217	64	45.2456	61.665	6
1971	5.89565	64	45.233	61.845	6
1972	6.81739	64	45.197	62.11	6
1973	7.02609	64	45.1849	61.998	6
1974	7.89565	64	45.1576	62.358	6
1975	7.96522	64	45.1523	62.324	6
1976	8.69565	64	45.102	62.779	6
1977	8.69565	64	45.1062	62.647	6
1978	11.0435	64	45.016	63.259	6
1979	13.0609	64	44.9037	63.732	6
1980	14.2435	64	44.8603	64.157	6
1981	14.3652	64	44.8306	64.496	6
1982	18.3826	64	44.6648	65.19	6
1983	18.3826	64	44.6705	65.049	6
1984	34.1043	64	43.9624	67.874	6
1985	1.13043	74.6667	45.4849	59.836	6
1986	1.18261	74.6667	45.5025	59.963	6
1987	1.42609	74.6667	45.4958	59.875	6
1988	1.63478	74.6667	45.4844	59.962	6
1989	1.8087	74.6667	45.4934	59.819	6
1990	2.76522	74.6667	45.4704	60.123	6
1991	4.01739	74.6667	45.466	59.981	6
1992	4.2087	74.6667	45.4489	60.376	6
1993	5.25217	74.6667	45.4579	60.165	6
1994	5.89565	74.6667	45.4027	60.445	6
1995	6.81739	74.6667	45.4023	60.622	6
1996	7.02609	74.6667	45.404	60.716	6
1997	7.89565	74.6667	45.3747	60.663	6
[truncated: 1,378 more rows]

## Sheet: Fig 5c
Fig 5c simulations
PC input	input size (nS)	distribution	slope
1	0.695652	1	-0.0136312
2	0.904348	1	-0.0169125
3	1.0087	1	-0.01935
4	1.18261	1	-0.0229094
5	1.42609	1	-0.0265375
6	1.63478	1	-0.0335625
7	1.8087	1	-0.0355813
8	1.91304	1	-0.0392875
9	2.46957	1	-0.0492375
10	3.2	1	-0.0619313
11	4.12174	1	-0.079125
12	4.33043	1	-0.0835469
13	5.47826	1	-0.102519
14	5.49565	1	-0.103881
15	7.02609	1	-0.130213
16	7.89565	1	-0.144675
17	7.96522	1	-0.147206
18	8.92174	1	-0.161025
19	9.30435	1	-0.169756
20	12.4	1	-0.216
21	14.2435	1	-0.241431
22	15.3913	1	-0.256825
23	15.9478	1	-0.262138
24	17.913	1	-0.287112
25	23.8957	1	-0.351488
26	1.0087	2	-0.0252875
27	1.91304	2	-0.0446625
28	2.41739	2	-0.0514937
29	3.2	2	-0.070375
30	4.2087	2	-0.0915875
31	5.47826	2	-0.117075
32	6.81739	2	-0.144725
33	6.97391	2	-0.150512
34	7.02609	2	-0.151134
35	7.63478	2	-0.162944
36	7.65217	2	-0.16405
37	8.06957	2	-0.169994
38	8.92174	2	-0.186369
39	8.97391	2	-0.189806
40	9.93043	2	-0.206075
41	13.3391	2	-0.268675
42	19.4609	2	-0.359725
43	21.6522	2	-0.388575
44	44.087	2	-0.618788
45	1.0087	3	-0.0222062
46	1.54783	3	-0.0324937
47	1.91304	3	-0.0413813
48	2.10435	3	-0.0428313
49	2.41739	3	-0.0504063
50	2.62609	3	-0.0548625
51	3.23478	3	-0.068
52	3.35652	3	-0.0690562
53	4.01739	3	-0.0839813
54	12.8348	3	-0.25915
55	14.3652	3	-0.286494
56	15.7043	3	-0.310544
57	20.1043	3	-0.384481
58	32.1739	3	-0.560244
59	50.4174	3	-0.7655
60	1.47826	4	-0.0334187
61	1.91304	4	-0.0436125
62	3.09565	4	-0.0671563
63	3.35652	4	-0.074875
64	3.53043	4	-0.0784812
65	4.33043	4	-0.0946625
66	5.26957	4	-0.116787
67	6.03478	4	-0.131206
68	7.89565	4	-0.169788
69	9.63478	4	-0.203156
70	12.8348	4	-0.263688
71	14.3652	4	-0.290025
72	15.4783	4	-0.307344
73	17.913	4	-0.349344
74	20.1043	4	-0.382406
75	50.4174	4	-0.719988
76	0.0521739	5	-0.00280625
77	0.53913	5	-0.0128625
78	0.956522	5	-0.0213687
79	1.13043	5	-0.0260312
80	1.32174	5	-0.0302469
81	1.63478	5	-0.036575
82	2.10435	5	-0.0450563
83	2.53913	5	-0.0532188
84	2.76522	5	-0.0604688
85	3.2	5	-0.06845
86	4.12174	5	-0.0856687
87	4.2087	5	-0.08735
88	4.33043	5	-0.0905063
89	5.25217	5	-0.105953
90	6.81739	5	-0.135319
91	7.02609	5	-0.142481
92	7.89565	5	-0.156331
93	7.96522	5	-0.15905
94	9.93043	5	-0.192331
95	11.687	5	-0.22255
96	12.8348	5	-0.240581
97	13.0609	5	-0.243078
98	15.3913	5	-0.279141
99	37.2522	5	-0.504756
100	1.13043	6	-0.0223937
101	1.18261	6	-0.0223687
102	1.42609	6	-0.0289
103	1.63478	6	-0.0314812
104	1.8087	6	-0.035575
105	2.76522	6	-0.0565187
106	4.01739	6	-0.0795437
107	4.2087	6	-0.084325
108	5.25217	6	-0.106731
109	5.89565	6	-0.118112
110	6.81739	6	-0.136094
111	7.02609	6	-0.140412
112	7.89565	6	-0.156994
113	7.96522	6	-0.155075
114	8.69565	6	-0.167987
115	11.0435	6	-0.210106
116	13.0609	6	-0.242631
117	14.2435	6	-0.261431
118	14.3652	6	-0.262969
119	18.3826	6	-0.316478
120	34.1043	6	-0.482681
121	1.42609	7	-0.0317312
122	1.91304	7	-0.0424
123	2.41739	7	-0.0506
124	2.76522	7	-0.05725
125	3.2	7	-0.0669562
126	4.2087	7	-0.0908562
127	6.97391	7	-0.147406
128	7.65217	7	-0.160031
129	12.4	7	-0.252044
130	12.8348	7	-0.259525
131	14.2435	7	-0.282325
132	14.3652	7	-0.288137
133	19.4609	7	-0.370419
134	24.087	7	-0.437175
135	46.5391	7	-0.687381
136	0.695652	8	-0.0139188
137	0.956522	8	-0.0159375
138	1.8087	8	-0.0368938
139	2.76522	8	-0.0594687
140	3.82609	8	-0.080925
141	4.12174	8	-0.0899812
142	4.33043	8	-0.0919094
143	6.81739	8	-0.14205
144	7.65217	8	-0.157419
145	8.92174	8	-0.184144
146	9.04348	8	-0.184606
147	12.4	8	-0.245987
148	13.3391	8	-0.263025
149	14.3652	8	-0.280888
150	15.7043	8	-0.301919
151	19.4609	8	-0.358862
152	32.2087	8	-0.520319
153	37.2522	8	-0.570219
154	0.13913	9	-0.0025375
155	0.904348	9	-0.0204375
156	2.53913	9	-0.0539938
157	3.82609	9	-0.0822344
158	4.12174	9	-0.0884
159	5.25217	9	-0.113662
160	5.26957	9	-0.1123
161	7.63478	9	-0.162275
162	8.97391	9	-0.189516
163	9.04348	9	-0.189856
164	11.8957	9	-0.246412
165	14.3652	9	-0.291152
166	15.7043	9	-0.311294
167	18.3826	9	-0.353831
168	50.4174	9	-0.705175
169	0.53913	10	-0.014325
170	1.13043	10	-0.0249437
171	1.63478	10	-0.035275
172	1.91304	10	-0.0435688
173	2.46957	10	-0.0536562
174	2.76522	10	-0.0605625
175	4.33043	10	-0.0958062
176	5.25217	10	-0.11495
177	5.49565	10	-0.120744
178	6.81739	10	-0.147006
179	7.63478	10	-0.165463
180	9.30435	10	-0.199725
181	9.63478	10	-0.206394
182	11.8957	10	-0.24955
183	13.3391	10	-0.27555
184	15.3913	10	-0.312169
185	18.3826	10	-0.363794
186	31.6522	10	-0.547637
187	50.4174	10	-0.740731

## Sheet: Fig 5d
Fig 5d dynamic clamp experiments
input size (nS)	slope
3	-0.0459
10	-0.1725
30	-0.335

## Sheet: Fig 5 supplement 1
Fig 5 supplement 1 simulations
A, 0.5x												A, 1.5x
PC input	input size (nS)	input rate (Hz)	Gi (nS)	output rate (Hz)	distribution		PC input	input size (nS)	distribution	slope		PC input	input size (nS)	input rate (Hz)	Gi (nS)	output rate (Hz)	distribution		PC input	input size (nS)	distribution	slope
0	0.347826	0	45.4194	39.426	1		1	0.347826	1	-0.0098625		0	1.35652	0	45.2023	67.729	1		1	1.35652	1	-0.0289813
1	0.347826	0	45.4157	39.339	1		2	0.452174	1	-0.0107125		1	1.51304	0	45.1693	67.863	1		2	1.51304	1	-0.0311312
2	0.452174	0	45.408	39.446	1		3	0.504348	1	-0.0130625		2	1.77391	0	45.101	68.483	1		3	1.77391	1	-0.0374063
3	0.504348	0	45.3845	39.658	1		4	0.591304	1	-0.0130219		3	1.77391	0	45.084	68.642	1		4	2.45217	1	-0.0489875
4	0.591304	0	45.3644	39.767	1		5	0.66087	1	-0.0135125		4	2.45217	0	44.9266	69.353	1		5	2.71304	1	-0.0554437
5	0.591304	0	45.363	39.658	1		6	0.713043	1	-0.0170313		5	2.71304	0	44.8805	69.897	1		6	2.86957	1	-0.0580937
6	0.66087	0	45.3508	39.697	1		7	0.721739	1	-0.0159187		6	2.86957	0	44.8537	70.148	1		7	3.70435	1	-0.0752875
7	0.713043	0	45.349	39.921	1		8	0.817391	1	-0.0174562		7	3.70435	0	44.6616	71.535	1		8	6.18261	1	-0.124644
8	0.721739	0	45.3391	39.814	1		9	0.904348	1	-0.0197625		8	6.18261	0	44.0878	75.666	1		9	6.49565	1	-0.127894
9	0.817391	0	45.3176	39.955	1		10	0.956522	1	-0.0194094		9	6.49565	0	44.01	75.985	1		10	8.21739	1	-0.160219
10	0.904348	0	45.2964	40.21	1		11	1.09565	1	-0.0206188		10	8.21739	0	43.6372	78.482	1		11	8.24348	1	-0.161281
11	0.956522	0	45.2967	40.183	1		12	1.23478	1	-0.0238438		11	8.24348	0	43.6287	78.585	1		12	9.17391	1	-0.176925
12	0.956522	0	45.3036	40.052	1		13	1.38261	1	-0.0277937		12	9.17391	0	43.4239	79.779	1		13	10.5391	1	-0.203181
13	1.09565	0	45.2743	40.197	1		14	1.6	1	-0.0322062		13	10.5391	0	43.0957	82.115	1		14	11.8435	1	-0.22495
14	1.23478	0	45.2359	40.547	1		15	2.06087	1	-0.0397812		14	11.8435	0	42.8166	83.856	1		15	11.9478	1	-0.227625
15	1.38261	0	45.1905	40.894	1		16	2.10435	1	-0.039525		15	11.9478	0	42.8036	84.021	1		16	13.9565	1	-0.2588
16	1.6	0	45.128	41.234	1		17	2.16522	1	-0.0412687		16	13.9565	0	42.3378	86.776	1		17	21.3652	1	-0.360556
17	2.06087	0	45.0361	41.871	1		18	2.73913	1	-0.0525		17	21.3652	0	40.6607	96.044	1		18	23.087	1	-0.383588
18	2.10435	0	45.0362	41.854	1		19	2.74783	1	-0.0505688		18	23.087	0	40.2573	98.391	1		19	23.9217	1	-0.394375
19	2.16522	0	45.0376	42.001	1		20	3.51304	1	-0.0652313		19	23.9217	0	40.0651	99.351	1		20	26.8696	1	-0.425662
20	2.16522	0	45.0346	41.935	1		21	3.94783	1	-0.0715563		20	26.8696	0	39.3948	102.432	1		21	2.86957	2	-0.0653062
21	2.73913	0	44.8791	42.964	1		22	3.98261	1	-0.0721813		21	1.35652	10.6667	45.2256	67.413	1		22	3.27826	2	-0.0742063
22	2.74783	0	44.876	42.719	1		23	4.46087	1	-0.0822375		22	1.51304	10.6667	45.1799	67.823	1		23	4.8	2	-0.109256
23	3.51304	0	44.7067	44.058	1		24	4.48696	1	-0.0817625		23	1.77391	10.6667	45.1258	68.166	1		24	6.31304	2	-0.143181
24	3.94783	0	44.6211	44.372	1		25	4.52174	1	-0.0847125		24	1.77391	10.6667	45.117	68.323	1		25	10.2261	2	-0.224631
25	3.94783	0	44.6261	44.46	1		26	4.65217	1	-0.0871438		25	2.45217	10.6667	44.9808	69.235	1		26	10.5391	2	-0.231272
26	3.98261	0	44.6193	44.537	1		27	6.2	1	-0.112169		26	2.71304	10.6667	44.9268	69.766	1		27	11.4522	2	-0.248575
27	4.46087	0	44.5154	45.433	1		28	6.5913	1	-0.1185		27	2.86957	10.6667	44.8964	69.975	1		28	12.1043	2	-0.262069
28	4.48696	0	44.5161	45.369	1		29	7.12174	1	-0.124537		28	3.70435	10.6667	44.7373	71.141	1		29	13.3826	2	-0.287281
29	4.52174	0	44.483	45.455	1		30	7.18261	1	-0.12565		29	6.18261	10.6667	44.2592	74.311	1		30	13.4609	2	-0.290269
30	4.65217	0	44.4541	45.835	1		31	7.69565	1	-0.133912		30	6.49565	10.6667	44.2088	74.751	1		31	14.8957	2	-0.318894
31	6.2	0	44.0908	48.021	1		32	7.97391	1	-0.138825		31	8.21739	10.6667	43.8627	77.058	1		32	20.0087	2	-0.405294
32	6.5913	0	44.0126	48.493	1		33	8.95652	1	-0.150891		32	8.24348	10.6667	43.8755	76.967	1		33	66.1304	2	-0.9277
33	7.12174	0	43.8804	49.061	1		34	10.0522	1	-0.166475		33	9.17391	10.6667	43.6869	78.403	1		34	2.32174	3	-0.0454937
34	7.18261	0	43.8687	49.087	1		35	16.087	1	-0.238538		34	10.5391	10.6667	43.4277	80.43	1		35	2.86957	3	-0.0554562
35	7.69565	0	43.733	49.874	1		36	18.6261	1	-0.263131		35	11.8435	10.6667	43.1682	81.779	1		36	4.85217	3	-0.0965375
36	7.97391	0	43.6891	50.243	1		37	25.2087	1	-0.321012		36	11.9478	10.6667	43.1501	81.914	1		37	14.3652	3	-0.271731
37	7.97391	0	43.6911	50.298	1		38	0.504348	2	-0.0108062		37	13.9565	10.6667	42.7566	83.972	1		38	21.5478	3	-0.395937
38	8.95652	0	43.4684	51.284	1		39	0.591304	2	-0.0107812		38	21.3652	10.6667	41.2823	92.187	1		39	30.1565	3	-0.527681
39	8.95652	0	43.4652	51.603	1		40	0.713043	2	-0.011575		39	23.087	10.6667	40.9568	93.953	1		40	48.2609	3	-0.768356
40	10.0522	0	43.2085	52.769	1		41	0.721739	2	-0.00954375		40	23.9217	10.6667	40.7789	95.008	1		41	75.6261	3	-1.05653
41	16.087	0	41.8246	59.469	1		42	0.956522	2	-0.0145813		41	26.8696	10.6667	40.1932	97.511	1		42	2.21739	4	-0.0456063
42	18.6261	0	41.2605	61.823	1		43	1.2087	2	-0.0195938		42	1.35652	21.3333	45.3109	67.215	1		43	2.86957	4	-0.0561938
43	25.2087	0	39.7614	67.664	1		44	1.38261	2	-0.0227625		43	1.51304	21.3333	45.2681	67.389	1		44	5.03478	4	-0.100975
44	0.347826	10.6667	45.4234	39.085	1		45	1.6	2	-0.0258437		44	1.77391	21.3333	45.2153	67.848	1		45	5.29565	4	-0.107262
45	0.347826	10.6667	45.4289	39.241	1		46	1.67826	2	-0.0283125		45	1.77391	21.3333	45.1928	67.952	1		46	6.49565	4	-0.1302
46	0.452174	10.6667	45.397	39.45	1		47	1.76522	2	-0.0294062		46	2.45217	21.3333	45.0676	68.821	1		47	7.90435	4	-0.154981
47	0.504348	10.6667	45.3848	39.534	1		48	2.10435	2	-0.0348479		47	2.71304	21.3333	45.0463	69.154	1		48	9.05217	4	-0.177619
48	0.591304	10.6667	45.3888	39.565	1		49	2.63478	2	-0.0438625		48	2.86957	21.3333	45.0285	69.18	1		49	11.8435	4	-0.224725
49	0.591304	10.6667	45.379	39.647	1		50	2.73913	2	-0.0455125		49	3.70435	21.3333	44.8999	69.938	1		50	12.6435	4	-0.238669
50	0.66087	10.6667	45.3751	39.88	1		51	2.94783	2	-0.0500562		50	6.18261	21.3333	44.4702	72.809	1		51	14.4522	4	-0.269462
51	0.713043	10.6667	45.3779	39.767	1		52	3.01739	2	-0.0488437		51	6.49565	21.3333	44.4205	73.323	1		52	19.2522	4	-0.342763
52	0.721739	10.6667	45.3689	39.909	1		53	3.4087	2	-0.0531375		52	8.21739	21.3333	44.1441	75.239	1		53	21.5478	4	-0.376269
53	0.817391	10.6667	45.3594	39.911	1		54	3.48696	2	-0.0555688		53	8.24348	21.3333	44.1408	75.042	1		54	23.2174	4	-0.395487
54	0.904348	10.6667	45.3408	40.012	1		55	3.51304	2	-0.0560688		54	9.17391	21.3333	43.9892	76.061	1		55	26.8696	4	-0.438903
55	0.956522	10.6667	45.3337	39.835	1		56	3.81739	2	-0.0606438		55	10.5391	21.3333	43.7563	77.749	1		56	0.808696	5	-0.0192562
56	0.956522	10.6667	45.3286	39.769	1		57	3.82609	2	-0.0604656		56	11.8435	21.3333	43.5273	79.146	1		57	1.43478	5	-0.032775
57	1.09565	10.6667	45.2906	40.232	1		58	3.98261	2	-0.06315		57	11.9478	21.3333	43.5189	79.37	1		58	1.69565	5	-0.034575
58	1.23478	10.6667	45.2716	40.471	1		59	4.03478	2	-0.0639312		58	13.9565	21.3333	43.1937	81.37	1		59	1.98261	5	-0.0458
59	1.38261	10.6667	45.2561	40.611	1		60	4.46087	2	-0.0709		59	21.3652	21.3333	41.9593	88.039	1		60	4.14783	5	-0.0889438
60	1.6	10.6667	45.2226	40.728	1		61	4.48696	2	-0.0718312		60	23.087	21.3333	41.6725	89.362	1		61	4.8	5	-0.105381
61	2.06087	10.6667	45.1292	41.417	1		62	4.96522	2	-0.0801313		61	23.9217	21.3333	41.5377	89.829	1		62	7.87826	5	-0.166525
62	2.10435	10.6667	45.1251	41.263	1		63	6.53043	2	-0.102356		62	26.8696	21.3333	41.0508	92.301	1		63	10.2261	5	-0.211938
63	2.16522	10.6667	45.1086	41.408	1		64	6.66957	2	-0.102987		63	1.35652	32	45.3023	67.124	1		64	11.9478	5	-0.247469
64	2.16522	10.6667	45.1039	41.416	1		65	6.86087	2	-0.107244		64	1.51304	32	45.2805	67.311	1		65	17.5304	5	-0.347394
65	2.73913	10.6667	44.9943	42.151	1		66	7.73913	2	-0.117431		65	1.77391	32	45.2476	67.371	1		66	17.9652	5	-0.354675
66	2.74783	10.6667	44.9797	42.355	1		67	8.95652	2	-0.133025		66	1.77391	32	45.2594	67.553	1		67	19.5913	5	-0.381059
67	3.51304	10.6667	44.8386	43.21	1		68	9.1913	2	-0.135275		67	2.45217	32	45.1663	68.271	1		68	23.087	5	-0.435688
68	3.94783	10.6667	44.7514	44.006	1		69	9.73043	2	-0.140378		68	2.71304	32	45.1368	68.359	1		69	55.8783	5	-0.806675
69	3.94783	10.6667	44.7516	43.772	1		70	16.3739	2	-0.203869		69	2.86957	32	45.1243	68.427	1		70	1.69565	6	-0.0373062
70	3.98261	10.6667	44.7627	43.84	1		71	22.0435	2	-0.248413		70	3.70435	32	45.0021	69.406	1		71	1.77391	6	-0.0391375
71	4.46087	10.6667	44.6559	44.443	1		72	0.504348	3	-0.00815625		71	6.18261	32	44.674	71.303	1		72	2.13913	6	-0.0456312
72	4.48696	10.6667	44.6413	44.481	1		73	0.591304	3	-0.0111188		72	6.49565	32	44.6303	71.497	1		73	2.45217	6	-0.0522813
73	4.52174	10.6667	44.65	44.355	1		74	0.773913	3	-0.0162		73	8.21739	32	44.4114	73.237	1		74	4.14783	6	-0.0869687
74	4.65217	10.6667	44.609	44.657	1		75	0.956522	3	-0.0173563		74	8.24348	32	44.411	73.353	1		75	4.24348	6	-0.0871875
75	6.2	10.6667	44.319	46.335	1		76	1.05217	3	-0.0213563		75	9.17391	32	44.3015	74.114	1		76	6.02609	6	-0.122
76	6.5913	10.6667	44.2314	46.952	1		77	1.09565	3	-0.0231062		76	10.5391	32	44.0916	75.171	1		77	7.87826	6	-0.157738
77	7.12174	10.6667	44.1242	47.401	1		78	1.2087	3	-0.0259563		77	11.8435	32	43.9045	76.414	1		78	10.5391	6	-0.208319
78	7.18261	10.6667	44.1034	47.602	1		79	1.6	3	-0.03425		78	11.9478	32	43.8906	76.549	1		79	11.8435	6	-0.2298
79	7.69565	10.6667	43.9991	48.258	1		80	1.61739	3	-0.0333594		79	13.9565	32	43.6142	78.131	1		80	13.0435	6	-0.250744
80	7.97391	10.6667	43.9338	48.611	1		81	1.67826	3	-0.0346938		80	21.3652	32	42.5935	83.619	1		81	16.5652	6	-0.305469
81	7.97391	10.6667	43.9305	48.465	1		82	2.0087	3	-0.0405625		81	23.087	32	42.3559	85.011	1		82	19.5913	6	-0.348956
82	8.95652	10.6667	43.7402	49.526	1		83	2.06957	3	-0.0402438		82	23.9217	32	42.2308	85.745	1		83	21.3652	6	-0.3731
83	8.95652	10.6667	43.7452	49.471	1		84	2.62609	3	-0.0520313		83	26.8696	32	41.8148	87.731	1		84	21.5478	6	-0.375956
84	10.0522	10.6667	43.5182	50.875	1		85	2.94783	3	-0.0592813		84	1.35652	42.6667	45.3209	66.651	1		85	27.5739	6	-0.451259
85	16.087	10.6667	42.3314	56.655	1		86	3.01739	3	-0.0597562		85	1.51304	42.6667	45.3003	66.751	1		86	2.13913	7	-0.0449219
86	18.6261	10.6667	41.8259	58.83	1		87	3.94783	3	-0.07945		86	1.77391	42.6667	45.2783	66.975	1		87	2.86957	7	-0.0608375
87	25.2087	10.6667	40.5269	63.638	1		88	4.34783	3	-0.0827875		87	1.77391	42.6667	45.286	66.992	1		88	3.62609	7	-0.0753063
88	0.347826	21.3333	45.4705	39.37	1		89	4.46087	3	-0.0856187		88	2.45217	42.6667	45.2324	67.514	1		89	4.14783	7	-0.08485
89	0.347826	21.3333	45.4591	39.119	1		90	4.48696	3	-0.0844312		89	2.71304	42.6667	45.212	67.763	1		90	5.33913	7	-0.108387
90	0.452174	21.3333	45.4332	39.231	1		91	4.52174	3	-0.0896312		90	2.86957	42.6667	45.2023	67.885	1		91	6.31304	7	-0.129469
91	0.504348	21.3333	45.4178	39.684	1		92	4.65217	3	-0.09045		91	3.70435	42.6667	45.1175	68.134	1		92	10.4609	7	-0.208275
92	0.591304	21.3333	45.4136	39.402	1		93	5.52174	3	-0.104319		92	6.18261	42.6667	44.8501	70.218	1		93	18.6	7	-0.352531
93	0.591304	21.3333	45.4182	39.472	1		94	6.2	3	-0.116944		93	6.49565	42.6667	44.8243	70.311	1		94	21.3652	7	-0.394069
94	0.66087	21.3333	45.4239	39.477	1		95	6.41739	3	-0.121519		94	8.21739	42.6667	44.6376	71.648	1		95	21.5478	7	-0.39635
95	0.713043	21.3333	45.4184	39.619	1		96	7.18261	3	-0.133375		95	8.24348	42.6667	44.6174	71.672	1		96	29.1913	7	-0.500681
96	0.721739	21.3333	45.4064	39.628	1		97	7.85217	3	-0.145569		96	9.17391	42.6667	44.5173	72.423	1		97	36.1304	7	-0.585609
97	0.817391	21.3333	45.3742	39.626	1		98	9.1913	3	-0.168675		97	10.5391	42.6667	44.3565	73.4	1		98	1.04348	8	-0.0224312
98	0.904348	21.3333	45.3431	39.844	1		99	10.0522	3	-0.181812		98	11.8435	42.6667	44.2287	74.32	1		99	1.13913	8	-0.0244
99	0.956522	21.3333	45.3426	39.945	1		100	16.087	3	-0.266566		99	11.9478	42.6667	44.2029	74.587	1		100	1.43478	8	-0.0296187
100	0.956522	21.3333	45.353	39.797	1		101	16.3739	3	-0.269869		100	13.9565	42.6667	43.9836	75.663	1		101	2.71304	8	-0.0578375
101	1.09565	21.3333	45.3433	39.937	1		102	22.0435	3	-0.334556		101	21.3652	42.6667	43.2125	79.821	1		102	4.14783	8	-0.0901875
102	1.23478	21.3333	45.3322	40.043	1		103	25.2087	3	-0.365106		102	23.087	42.6667	43.021	80.745	1		103	5.73913	8	-0.12325
103	1.38261	21.3333	45.2978	40.275	1		104	0.156522	4	-0.00245		103	23.9217	42.6667	42.9457	80.814	1		104	6.49565	8	-0.140538
104	1.6	21.3333	45.2582	40.436	1		105	0.382609	4	-0.00771875		104	26.8696	42.6667	42.6193	82.389	1		105	10.2261	8	-0.2162
105	2.06087	21.3333	45.1827	41.054	1		106	0.565217	4	-0.0104125		105	1.35652	53.3333	45.421	66.051	1		106	11.4783	8	-0.2377
106	2.10435	21.3333	45.1662	41.17	1		107	0.66087	4	-0.0105938		106	1.51304	53.3333	45.4054	66.131	1		107	13.3826	8	-0.274344
107	2.16522	21.3333	45.1578	41.168	1		108	0.73913	4	-0.0136422		107	1.77391	53.3333	45.389	66.357	1		108	13.5652	8	-0.274444
108	2.16522	21.3333	45.1587	41.05	1		109	0.956522	4	-0.0171		108	1.77391	53.3333	45.3962	66.638	1		109	20.0087	8	-0.386663
109	2.73913	21.3333	45.0675	41.814	1		110	1.23478	4	-0.0231125		109	2.45217	53.3333	45.3386	66.821	1		110	23.5565	8	-0.441937
110	2.74783	21.3333	45.0753	41.624	1		111	1.38261	4	-0.0239875		110	2.71304	53.3333	45.2949	67.152	1		111	29.1913	8	-0.5246
111	3.51304	21.3333	44.9472	42.37	1		112	1.67826	4	-0.0302406		111	2.86957	53.3333	45.2777	67.359	1		112	55.8783	8	-0.815875
112	3.94783	21.3333	44.8941	42.988	1		113	1.76522	4	-0.0319875		112	3.70435	53.3333	45.2109	67.581	1		113	1.58261	9	-0.0332187
113	3.94783	21.3333	44.8842	43.028	1		114	2.16522	4	-0.0387438		113	6.18261	53.3333	45.0194	69.248	1		114	3.8087	9	-0.0822375
114	3.98261	21.3333	44.8767	42.868	1		115	2.63478	4	-0.048025		114	6.49565	53.3333	44.9958	69.203	1		115	5.73913	9	-0.124037
115	4.46087	21.3333	44.7922	43.352	1		116	2.94783	4	-0.0546156		115	8.21739	53.3333	44.8661	69.875	1		116	7.90435	9	-0.167319
116	4.48696	21.3333	44.781	43.452	1		117	3.01739	4	-0.055025		116	8.24348	53.3333	44.8653	70.056	1		117	11.4522	9	-0.238962
117	4.52174	21.3333	44.7801	43.532	1		118	3.48696	4	-0.0620938		117	9.17391	53.3333	44.7976	70.339	1		118	13.4609	9	-0.279741
118	4.65217	21.3333	44.7535	43.496	1		119	3.75652	4	-0.0682375		118	10.5391	53.3333	44.6987	70.941	1		119	17.8435	9	-0.362525
119	6.2	21.3333	44.5015	45.07	1		120	3.81739	4	-0.0680625		119	11.8435	53.3333	44.5994	71.44	1		120	21.5478	9	-0.426525
120	6.5913	21.3333	44.4445	45.49	1		121	3.94783	4	-0.0713625		120	11.9478	53.3333	44.597	71.591	1		121	27.5739	9	-0.525969
121	7.12174	21.3333	44.3563	46.243	1		122	4.81739	4	-0.0866937		121	13.9565	53.3333	44.4417	72.649	1		122	75.6261	9	-1.05934
122	7.18261	21.3333	44.3401	46.232	1		123	6.41739	4	-0.111344		122	21.3652	53.3333	43.8699	75.761	1		123	1.69565	10	-0.0415312
123	7.69565	21.3333	44.2519	46.603	1		124	6.66957	4	-0.115056		123	23.087	53.3333	43.7499	76.368	1		124	2.45217	10	-0.057975
124	7.97391	21.3333	44.2132	46.983	1		125	7.18261	4	-0.124128		124	23.9217	53.3333	43.6877	76.241	1		125	3.70435	10	-0.0865375
125	7.97391	21.3333	44.2008	47.147	1		126	7.73913	4	-0.1327		125	26.8696	53.3333	43.4665	77.43	1		126	4.14783	10	-0.0975625
126	8.95652	21.3333	44.036	47.797	1		127	8.95652	4	-0.148794		126	1.35652	64	45.4546	65.836	1		127	6.49565	10	-0.149031
127	8.95652	21.3333	44.0312	47.927	1		128	9.1913	4	-0.152756		127	1.51304	64	45.4392	66.009	1		128	6.61739	10	-0.151312
128	10.0522	21.3333	43.8695	48.68	1		129	10.0522	4	-0.164981		128	1.77391	64	45.4173	66.043	1		129	8.24348	10	-0.186369
129	16.087	21.3333	42.8654	53.485	1		130	16.087	4	-0.235597		129	1.77391	64	45.4086	66.062	1		130	10.2261	10	-0.228644
130	18.6261	21.3333	42.4305	55.461	1		131	25.2087	4	-0.32015		130	2.45217	64	45.3986	66.436	1		131	11.4522	10	-0.255213
131	25.2087	21.3333	41.3255	59.719	1		132	0.269565	5	-0.0061875		131	2.71304	64	45.3714	66.547	1		132	13.9565	10	-0.306306
132	0.347826	32	45.4579	39.143	1		133	0.478261	5	-0.00798333		132	2.86957	64	45.3688	66.51	1		133	14.4522	10	-0.314538
133	0.347826	32	45.4434	39.104	1		134	0.565217	5	-0.010325		133	3.70435	64	45.3417	66.63	1		134	17.8435	10	-0.380669
134	0.452174	32	45.4254	39.394	1		135	0.66087	5	-0.0128083		134	6.18261	64	45.2138	67.499	1		135	23.087	10	-0.470669
135	0.504348	32	45.4259	39.367	1		136	0.713043	5	-0.0135563		135	6.49565	64	45.2045	67.684	1		136	75.6261	10	-1.06736
136	0.591304	32	45.4182	39.31	1		137	0.73913	5	-0.01125		136	8.21739	64	45.1381	68.172	1
137	0.591304	32	45.4315	39.427	1		138	0.773913	5	-0.0123187		137	8.24348	64	45.1357	67.994	1
138	0.66087	32	45.4105	39.431	1		139	0.817391	5	-0.0138187		138	9.17391	64	45.0913	68.387	1
139	0.713043	32	45.4049	39.616	1		140	0.904348	5	-0.0155687		139	10.5391	64	45.0112	69.015	1
140	0.721739	32	45.3943	39.589	1		141	1.05217	5	-0.017625		140	11.8435	64	44.9482	69.442	1
141	0.817391	32	45.3847	39.698	1		142	1.26957	5	-0.0230438		141	11.9478	64	44.9619	69.134	1
142	0.904348	32	45.3801	39.781	1		143	1.38261	5	-0.024875		142	13.9565	64	44.877	69.638	1
143	0.956522	32	45.3568	39.844	1		144	1.6	5	-0.0270344		143	21.3652	64	44.5386	71.498	1
144	0.956522	32	45.3567	39.83	1		145	1.67826	5	-0.0301125		144	23.087	64	44.4642	72.16	1
145	1.09565	32	45.33	40.007	1		146	1.76522	5	-0.0321313		145	23.9217	64	44.4285	72.028	1
146	1.23478	32	45.3086	40.176	1		147	2.06087	5	-0.0370344		146	26.8696	64	44.2927	72.585	1
147	1.38261	32	45.2891	40.333	1		148	2.10435	5	-0.0403188		147	1.35652	74.6667	45.5102	65.27	1
148	1.6	32	45.264	40.613	1		149	2.16522	5	-0.0404625		148	1.51304	74.6667	45.5211	65.098	1
149	2.06087	32	45.2144	40.566	1		150	2.62609	5	-0.0483854		149	1.77391	74.6667	45.5094	65.414	1
150	2.10435	32	45.2201	40.94	1		151	3.4087	5	-0.0620187		150	1.77391	74.6667	45.4931	65.371	1
151	2.16522	32	45.2095	40.841	1		152	3.51304	5	-0.065125		151	2.45217	74.6667	45.48	65.343	1
152	2.16522	32	45.2029	40.974	1		153	3.82609	5	-0.0689437		152	2.71304	74.6667	45.4779	65.621	1
153	2.73913	32	45.1385	41.388	1		154	3.94783	5	-0.0713		153	2.86957	74.6667	45.4486	65.654	1
154	2.74783	32	45.1361	41.213	1		155	3.98261	5	-0.0698938		154	3.70435	74.6667	45.4392	65.796	1
155	3.51304	32	45.0489	41.832	1		156	4.81739	5	-0.0825313		155	6.18261	74.6667	45.4104	65.894	1
156	3.94783	32	44.9652	42.278	1		157	4.96522	5	-0.0874125		156	6.49565	74.6667	45.4055	65.77	1
157	3.94783	32	44.969	42.593	1		158	5.52174	5	-0.093675		157	8.21739	74.6667	45.3859	66.195	1
158	3.98261	32	44.9371	42.657	1		159	5.84348	5	-0.100419		158	8.24348	74.6667	45.3903	66.207	1
159	4.46087	32	44.8669	42.952	1		160	6.41739	5	-0.109088		159	9.17391	74.6667	45.3796	66.072	1
160	4.48696	32	44.8843	42.758	1		161	6.53043	5	-0.110644		160	10.5391	74.6667	45.3444	66.302	1
161	4.52174	32	44.8857	42.735	1		162	7.69565	5	-0.127375		161	11.8435	74.6667	45.3546	66.599	1
162	4.65217	32	44.8672	42.904	1		163	9.55652	5	-0.153562		162	11.9478	74.6667	45.357	66.58	1
163	6.2	32	44.647	44.153	1		164	9.73043	5	-0.156006		163	13.9565	74.6667	45.3257	66.7	1
164	6.5913	32	44.5981	44.435	1		165	16.3739	5	-0.231781		164	21.3652	74.6667	45.2262	67.093	1
165	7.12174	32	44.5094	44.837	1		166	18.6261	5	-0.253681		165	23.087	74.6667	45.1859	67.317	1
166	7.18261	32	44.5024	44.814	1		167	25.2087	5	-0.308131		166	23.9217	74.6667	45.1837	67.3	1
167	7.69565	32	44.4326	45.342	1		168	0.269565	6	-0.006275		167	26.8696	74.6667	45.1339	67.61	1
168	7.97391	32	44.4122	45.73	1		169	0.565217	6	-0.0120938		168	1.35652	85.3333	45.5392	65.009	1
169	7.97391	32	44.4159	45.519	1		170	0.591304	6	-0.0124		169	1.51304	85.3333	45.5351	65.249	1
170	8.95652	32	44.2738	46.407	1		171	0.713043	6	-0.0146		170	1.77391	85.3333	45.5384	65.023	1
171	8.95652	32	44.2773	46.194	1		172	0.721739	6	-0.0131687		171	1.77391	85.3333	45.535	65.283	1
172	10.0522	32	44.1136	46.98	1		173	0.773913	6	-0.013625		172	2.45217	85.3333	45.5336	65.199	1
173	16.087	32	43.292	51.055	1		174	0.817391	6	-0.0152312		173	2.71304	85.3333	45.5416	65.096	1
174	18.6261	32	42.9545	52.286	1		175	0.904348	6	-0.0165406		174	2.86957	85.3333	45.5355	65.45	1
175	25.2087	32	42.0646	55.638	1		176	1.23478	6	-0.0238937		175	3.70435	85.3333	45.5718	64.985	1
176	0.347826	42.6667	45.4813	38.727	1		177	1.38261	6	-0.0249187		176	6.18261	85.3333	45.6028	64.655	1
177	0.347826	42.6667	45.4706	38.818	1		178	2.0087	6	-0.0342906		177	6.49565	85.3333	45.5942	64.794	1
178	0.452174	42.6667	45.4648	38.657	1		179	2.10435	6	-0.0344312		178	8.21739	85.3333	45.6231	64.591	1
179	0.504348	42.6667	45.4449	38.88	1		180	2.24348	6	-0.0384875		179	8.24348	85.3333	45.6248	64.684	1
180	0.591304	42.6667	45.4504	38.705	1		181	2.62609	6	-0.0462844		180	9.17391	85.3333	45.6357	64.382	1
181	0.591304	42.6667	45.4511	38.946	1		182	2.94783	6	-0.0509625		181	10.5391	85.3333	45.6453	64.357	1
182	0.66087	42.6667	45.4682	38.981	1		183	3.01739	6	-0.0510437		182	11.8435	85.3333	45.672	64.2	1
183	0.713043	42.6667	45.4597	38.728	1		184	3.4087	6	-0.0587		183	11.9478	85.3333	45.6566	64.167	1
184	0.721739	42.6667	45.4535	38.809	1		185	3.51304	6	-0.0608062		184	13.9565	85.3333	45.6804	63.762	1
185	0.817391	42.6667	45.4265	39.047	1		186	3.81739	6	-0.0645938		185	21.3652	85.3333	45.8108	63.544	1
186	0.904348	42.6667	45.4164	38.905	1		187	3.82609	6	-0.0639062		186	23.087	85.3333	45.833	63.573	1
187	0.956522	42.6667	45.4008	39.276	1		188	3.94783	6	-0.068175		187	23.9217	85.3333	45.8485	63.499	1
188	0.956522	42.6667	45.3976	39.309	1		189	3.98261	6	-0.0687375		188	26.8696	85.3333	45.9174	62.833	1
189	1.09565	42.6667	45.3875	39.402	1		190	4.34783	6	-0.0741437		189	1.35652	96	45.588	65.018	1
190	1.23478	42.6667	45.3816	39.579	1		191	4.46087	6	-0.0746156		190	1.51304	96	45.6126	64.541	1
191	1.38261	42.6667	45.3679	40.027	1		192	5.52174	6	-0.0909937		191	1.77391	96	45.6351	64.415	1
192	1.6	42.6667	45.3279	39.845	1		193	6.53043	6	-0.106775		192	1.77391	96	45.6281	64.451	1
193	2.06087	42.6667	45.2906	39.94	1		194	6.66957	6	-0.108994		193	2.45217	96	45.6586	64.33	1
194	2.10435	42.6667	45.2845	39.887	1		195	7.12174	6	-0.113319		194	2.71304	96	45.6515	64.431	1
195	2.16522	42.6667	45.2787	40.086	1		196	7.18261	6	-0.115997		195	2.86957	96	45.652	64.325	1
196	2.16522	42.6667	45.262	40.048	1		197	8.95652	6	-0.1367		196	3.70435	96	45.6897	64.107	1
197	2.73913	42.6667	45.2028	40.608	1		198	9.1913	6	-0.140878		197	6.18261	96	45.7935	63.425	1
198	2.74783	42.6667	45.198	40.547	1		199	22.0435	6	-0.261397		198	6.49565	96	45.7988	63.373	1
199	3.51304	42.6667	45.1172	41.149	1		200	0.269565	7	-0.00400625		199	8.21739	96	45.8833	62.848	1
200	3.94783	42.6667	45.0804	41.3	1		201	0.565217	7	-0.0108625		200	8.24348	96	45.881	62.684	1
201	3.94783	42.6667	45.0895	41.523	1		202	0.591304	7	-0.0102313		201	9.17391	96	45.9218	62.579	1
202	3.98261	42.6667	45.0772	41.529	1		203	0.713043	7	-0.01175		202	10.5391	96	45.9904	62.006	1
203	4.46087	42.6667	45.0294	41.716	1		204	0.73913	7	-0.0138781		203	11.8435	96	46.0569	61.551	1
204	4.48696	42.6667	45.0317	41.896	1		205	0.773913	7	-0.0129375		204	11.9478	96	46.0558	61.764	1
205	4.52174	42.6667	45.0183	41.974	1		206	0.956522	7	-0.016025		205	13.9565	96	46.1547	61.076	1
206	4.65217	42.6667	45.0011	42.216	1		207	1.2087	7	-0.0207437		206	21.3652	96	46.4857	59.399	1
207	6.2	42.6667	44.8439	43.133	1		208	1.38261	7	-0.0245313		207	23.087	96	46.5697	59.353	1
208	6.5913	42.6667	44.802	43.144	1		209	1.6	7	-0.0288813		208	23.9217	96	46.623	59	1
209	7.12174	42.6667	44.7423	43.557	1		210	1.61739	7	-0.0300438		209	26.8696	96	46.753	58.357	1
210	7.18261	42.6667	44.7381	43.321	1		211	1.67826	7	-0.02995		210	1.35652	106.667	45.6208	64.578	1
211	7.69565	42.6667	44.6815	43.736	1		212	2.10435	7	-0.0382313		211	1.51304	106.667	45.6535	64.36	1
212	7.97391	42.6667	44.6551	43.895	1		213	2.16522	7	-0.0375125		212	1.77391	106.667	45.6625	64.303	1
213	7.97391	42.6667	44.6722	43.651	1		214	2.74783	7	-0.0496625		213	1.77391	106.667	45.6545	64.405	1
214	8.95652	42.6667	44.5593	44.328	1		215	3.01739	7	-0.0540187		214	2.45217	106.667	45.726	63.739	1
215	8.95652	42.6667	44.565	44.136	1		216	3.03478	7	-0.0564938		215	2.71304	106.667	45.7345	63.942	1
216	10.0522	42.6667	44.4365	45.004	1		217	3.48696	7	-0.0626562		216	2.86957	106.667	45.7569	63.465	1
217	16.087	42.6667	43.8058	48.151	1		218	3.51304	7	-0.0609188		217	3.70435	106.667	45.8102	63.322	1
218	18.6261	42.6667	43.5335	49.194	1		219	3.82609	7	-0.0677542		218	6.18261	106.667	46.0059	61.845	1
219	25.2087	42.6667	42.8364	51.484	1		220	4.03478	7	-0.0726875		219	6.49565	106.667	46.0377	61.516	1
220	0.347826	53.3333	45.4893	38.883	1		221	4.46087	7	-0.0792313		220	8.21739	106.667	46.1875	60.78	1
221	0.347826	53.3333	45.4863	38.89	1		222	4.52174	7	-0.0795938		221	8.24348	106.667	46.1692	60.8	1
222	0.452174	53.3333	45.4864	38.831	1		223	5.84348	7	-0.101437		222	9.17391	106.667	46.2449	60.593	1
223	0.504348	53.3333	45.491	38.794	1		224	6.2	7	-0.108975		223	10.5391	106.667	46.3295	59.838	1
224	0.591304	53.3333	45.4797	38.802	1		225	6.41739	7	-0.111444		224	11.8435	106.667	46.4059	59.491	1
225	0.591304	53.3333	45.4946	38.678	1		226	7.12174	7	-0.123162		225	11.9478	106.667	46.4244	59.211	1
226	0.66087	53.3333	45.4799	38.842	1		227	7.18261	7	-0.121798		226	13.9565	106.667	46.5738	58.411	1
227	0.713043	53.3333	45.4642	38.824	1		228	9.73043	7	-0.160084		227	21.3652	106.667	47.1428	55.588	1
228	0.721739	53.3333	45.4631	38.814	1		229	12.0435	7	-0.187213		228	23.087	106.667	47.2658	55.17	1
229	0.817391	53.3333	45.4532	38.913	1		230	18.6261	7	-0.256106		229	23.9217	106.667	47.3214	55.088	1
230	0.904348	53.3333	45.4391	39.126	1		231	25.2087	7	-0.309806		230	26.8696	106.667	47.5474	54.035	1
231	0.956522	53.3333	45.4383	39.056	1		232	0.191304	8	-0.002075		231	1.35652	117.333	45.6506	64.358	1
232	0.956522	53.3333	45.4509	39.03	1		233	0.347826	8	-0.00469375		232	1.51304	117.333	45.6677	64.237	1
233	1.09565	53.3333	45.4373	39.12	1		234	0.382609	8	-0.00717188		233	1.77391	117.333	45.686	64.209	1
234	1.23478	53.3333	45.4188	39.174	1		235	0.478261	8	-0.00910625		234	1.77391	117.333	45.6873	64.131	1
235	1.38261	53.3333	45.4019	39.465	1		236	0.504348	8	-0.0097375		235	2.45217	117.333	45.7705	63.58	1
236	1.6	53.3333	45.3963	39.581	1		237	0.713043	8	-0.0108844		236	2.71304	117.333	45.8067	63.197	1
237	2.06087	53.3333	45.3525	39.942	1		238	0.904348	8	-0.0127625		237	2.86957	117.333	45.8204	63.208	1
238	2.10435	53.3333	45.3506	39.806	1		239	0.956522	8	-0.01375		238	3.70435	117.333	45.8897	62.824	1
239	2.16522	53.3333	45.3414	39.995	1		240	1.09565	8	-0.0169562		239	6.18261	117.333	46.1515	60.886	1
240	2.16522	53.3333	45.3349	39.801	1		241	1.23478	8	-0.0208562		240	6.49565	117.333	46.2074	60.626	1
241	2.73913	53.3333	45.2873	40.305	1		242	1.38261	8	-0.0230875		241	8.21739	117.333	46.3896	59.564	1
242	2.74783	53.3333	45.2958	40.207	1		243	1.6	8	-0.0267375		242	8.24348	117.333	46.4022	59.29	1
243	3.51304	53.3333	45.2429	40.27	1		244	1.67826	8	-0.02615		243	9.17391	117.333	46.5073	58.612	1
244	3.94783	53.3333	45.2092	40.717	1		245	1.91304	8	-0.0293844		244	10.5391	117.333	46.6528	57.729	1
245	3.94783	53.3333	45.1971	40.681	1		246	2.0087	8	-0.031225		245	11.8435	117.333	46.785	57.016	1
246	3.98261	53.3333	45.1906	40.993	1		247	2.06087	8	-0.0312812		246	11.9478	117.333	46.7879	56.957	1
247	4.46087	53.3333	45.1568	40.931	1		248	2.10435	8	-0.0339656		247	13.9565	117.333	46.9993	55.91	1
248	4.48696	53.3333	45.1634	41.002	1		249	2.16522	8	-0.0349646		248	21.3652	117.333	47.7682	52.323	1
249	4.52174	53.3333	45.1559	40.993	1		250	2.74783	8	-0.0439937		249	23.087	117.333	47.9671	51.302	1
250	4.65217	53.3333	45.1541	40.961	1		251	2.94783	8	-0.0474562		250	23.9217	117.333	48.0487	51.19	1
251	6.2	53.3333	45.0149	41.919	1		252	3.4087	8	-0.0532844		251	26.8696	117.333	48.3688	50.065	1
252	6.5913	53.3333	44.9951	42.13	1		253	3.48696	8	-0.0542938		252	1.35652	128	45.693	64.238	1
253	7.12174	53.3333	44.9487	42.187	1		254	3.82609	8	-0.0601875		253	1.51304	128	45.7121	64.057	1
254	7.18261	53.3333	44.9539	42.222	1		255	4.34783	8	-0.0679938		254	1.77391	128	45.7466	63.715	1
255	7.69565	53.3333	44.9108	42.427	1		256	4.46087	8	-0.070075		255	1.77391	128	45.7418	63.706	1
256	7.97391	53.3333	44.8963	42.488	1		257	4.52174	8	-0.0710781		256	2.45217	128	45.8348	63.188	1
257	7.97391	53.3333	44.9018	42.402	1		258	4.81739	8	-0.0743562		257	2.71304	128	45.8718	62.786	1
258	8.95652	53.3333	44.8225	42.881	1		259	5.52174	8	-0.0853		258	2.86957	128	45.8922	62.854	1
259	8.95652	53.3333	44.84	42.738	1		260	5.84348	8	-0.087725		259	3.70435	128	46.0435	61.829	1
260	10.0522	53.3333	44.7524	43.185	1		261	6.2	8	-0.0929938		260	6.18261	128	46.37	59.835	1
261	16.087	53.3333	44.2993	45.133	1		262	6.66957	8	-0.101019		261	6.49565	128	46.3995	59.521	1
262	18.6261	53.3333	44.1062	45.935	1		263	7.18261	8	-0.106975		262	8.21739	128	46.6116	57.986	1
263	25.2087	53.3333	43.6092	47.802	1		264	7.85217	8	-0.115244		263	8.24348	128	46.6163	58.182	1
264	0.347826	64	45.5041	38.565	1		265	7.97391	8	-0.117416		264	9.17391	128	46.736	57.165	1
265	0.347826	64	45.503	38.527	1		266	9.73043	8	-0.137381		265	10.5391	128	46.9392	56.034	1
266	0.452174	64	45.4975	38.438	1		267	16.087	8	-0.197988		266	11.8435	128	47.1306	54.969	1
267	0.504348	64	45.4891	38.84	1		268	16.3739	8	-0.2004		267	11.9478	128	47.1461	54.845	1
268	0.591304	64	45.4961	38.7	1		269	18.6261	8	-0.217694		268	13.9565	128	47.4314	53.193	1
269	0.591304	64	45.5016	38.884	1		270	0.347826	9	-0.00575		269	21.3652	128	48.4473	48.563	1
270	0.66087	64	45.4972	38.806	1		271	0.452174	9	-0.0081625		270	23.087	128	48.6797	47.631	1
271	0.713043	64	45.4898	38.9	1		272	0.773913	9	-0.0121063		271	23.9217	128	48.773	47.407	1
272	0.721739	64	45.4878	38.946	1		273	0.817391	9	-0.0134969		272	26.8696	128	49.1714	45.886	1
273	0.817391	64	45.4929	38.855	1		274	1.26957	9	-0.0198125		273	1.35652	138.667	45.7615	63.662	1
274	0.904348	64	45.4948	38.878	1		275	1.76522	9	-0.0281563		274	1.51304	138.667	45.7842	63.279	1
275	0.956522	64	45.494	38.9	1		276	1.91304	9	-0.0312229		275	1.77391	138.667	45.8207	63.113	1
276	0.956522	64	45.4833	39.015	1		277	2.06087	9	-0.0331188		276	1.77391	138.667	45.8242	63.054	1
277	1.09565	64	45.4833	39.124	1		278	2.16522	9	-0.0351438		277	2.45217	138.667	45.9195	62.125	1
278	1.23478	64	45.4673	39.062	1		279	2.62609	9	-0.0419625		278	2.71304	138.667	45.9607	61.915	1
279	1.38261	64	45.4558	39.207	1		280	2.63478	9	-0.0424781		279	2.86957	138.667	45.9942	62.06	1
280	1.6	64	45.4498	39.287	1		281	2.73913	9	-0.0431125		280	3.70435	138.667	46.1541	60.613	1
281	2.06087	64	45.4299	39.416	1		282	3.81739	9	-0.0594		281	6.18261	138.667	46.5791	58.051	1
282	2.10435	64	45.4357	39.342	1		283	3.82609	9	-0.0601062		282	6.49565	138.667	46.6411	57.88	1
283	2.16522	64	45.4359	39.278	1		284	3.94783	9	-0.062425		283	8.21739	138.667	46.907	55.902	1
284	2.16522	64	45.4312	39.245	1		285	4.46087	9	-0.0686094		284	8.24348	138.667	46.912	55.857	1
285	2.73913	64	45.3975	39.357	1		286	4.48696	9	-0.0698292		285	9.17391	138.667	47.0518	55.024	1
286	2.74783	64	45.3872	39.438	1		287	4.52174	9	-0.0692688		286	10.5391	138.667	47.2762	53.412	1
287	3.51304	64	45.3594	39.689	1		288	5.94783	9	-0.0887938		287	11.8435	138.667	47.5118	52.377	1
288	3.94783	64	45.336	39.806	1		289	6.53043	9	-0.0962875		288	11.9478	138.667	47.5279	52.325	1
289	3.94783	64	45.3427	39.933	1		290	6.66957	9	-0.100131		289	13.9565	138.667	47.8671	50.664	1
290	3.98261	64	45.337	39.864	1		291	7.18261	9	-0.10388		290	21.3652	138.667	49.0893	44.986	1
291	4.46087	64	45.3222	40.276	1		292	7.66957	9	-0.110231		291	23.087	138.667	49.3699	43.888	1
292	4.48696	64	45.3152	40.038	1		293	7.85217	9	-0.113662		292	23.9217	138.667	49.5075	43.433	1
293	4.52174	64	45.321	39.999	1		294	8.95652	9	-0.1264		293	26.8696	138.667	50.0149	41.659	1
294	4.65217	64	45.307	40.043	1		295	9.1913	9	-0.128275		294	1.35652	149.333	45.7768	63.627	1
295	6.2	64	45.2318	40.533	1		296	25.2087	9	-0.257294		295	1.51304	149.333	45.8102	63.511	1
296	6.5913	64	45.2142	40.792	1		297	0.269565	10	-0.00394375		296	1.77391	149.333	45.8625	63.144	1
297	7.12174	64	45.1918	40.814	1		298	0.347826	10	-0.00416563		297	1.77391	149.333	45.8552	63.042	1
298	7.18261	64	45.1862	40.756	1		299	0.452174	10	-0.00748125		298	2.45217	149.333	45.9806	61.9	1
299	7.69565	64	45.1643	40.701	1		300	0.478261	10	-0.00854375		299	2.71304	149.333	46.0162	61.65	1
300	7.97391	64	45.1502	40.699	1		301	0.565217	10	-0.0087		300	2.86957	149.333	46.0537	61.599	1
301	7.97391	64	45.1529	40.849	1		302	0.66087	10	-0.0102375		301	3.70435	149.333	46.2203	60.427	1
302	8.95652	64	45.106	40.952	1		303	0.817391	10	-0.0123337		302	6.18261	149.333	46.6956	57.224	1
303	8.95652	64	45.1167	40.911	1		304	0.956522	10	-0.0147625		303	6.49565	149.333	46.7607	56.56	1
304	10.0522	64	45.0598	41.325	1		305	1.23478	10	-0.0208438		304	8.21739	149.333	47.0983	54.571	1
305	16.087	64	44.7821	42.429	1		306	1.26957	10	-0.0202438		305	8.24348	149.333	47.1154	54.5	1
306	18.6261	64	44.6599	43.114	1		307	1.38261	10	-0.0232125		306	9.17391	149.333	47.3037	53.335	1
307	25.2087	64	44.3659	44.135	1		308	2.06087	10	-0.0348906		307	10.5391	149.333	47.5917	51.606	1
308	0.347826	74.6667	45.5399	38.426	1		309	2.10435	10	-0.0375		308	11.8435	149.333	47.8474	50.439	1
309	0.347826	74.6667	45.5209	38.578	1		310	2.16522	10	-0.0367125		309	11.9478	149.333	47.8801	50.317	1
310	0.452174	74.6667	45.5298	38.698	1		311	2.62609	10	-0.04575		310	13.9565	149.333	48.2704	48.199	1
311	0.504348	74.6667	45.5358	38.623	1		312	2.74783	10	-0.0471875		311	21.3652	149.333	49.7254	41.657	1
312	0.591304	74.6667	45.5308	38.606	1		313	3.01739	10	-0.0520562		312	23.087	149.333	50.0649	40.429	1
313	0.591304	74.6667	45.5577	38.564	1		314	3.4087	10	-0.0572312		313	23.9217	149.333	50.2302	39.929	1
314	0.66087	74.6667	45.556	38.505	1		315	3.81739	10	-0.0643937		314	26.8696	149.333	50.8067	37.935	1
315	0.713043	74.6667	45.5749	38.309	1		316	4.48696	10	-0.075425		315	1.35652	160	45.8161	63.092	1
316	0.721739	74.6667	45.5632	38.405	1		317	4.65217	10	-0.0775875		316	1.51304	160	45.8486	62.882	1
317	0.817391	74.6667	45.5473	38.578	1		318	4.81739	10	-0.0783937		317	1.77391	160	45.9077	62.578	1
318	0.904348	74.6667	45.5417	38.578	1		319	5.70435	10	-0.0921		318	1.77391	160	45.9177	62.577	1
319	0.956522	74.6667	45.5356	38.444	1		320	5.94783	10	-0.0960531		319	2.45217	160	46.0585	61.515	1
320	0.956522	74.6667	45.5169	38.634	1		321	6.25217	10	-0.0995125		320	2.71304	160	46.1311	61.026	1
321	1.09565	74.6667	45.5105	38.509	1		322	6.53043	10	-0.102556		321	2.86957	160	46.1613	60.853	1
322	1.23478	74.6667	45.5087	38.488	1		323	6.66957	10	-0.104237		322	3.70435	160	46.3524	59.489	1
323	1.38261	74.6667	45.5037	38.691	1		324	7.12174	10	-0.112513		323	6.18261	160	46.9123	55.723	1
324	1.6	74.6667	45.4802	38.524	1		325	7.18261	10	-0.115187		324	6.49565	160	46.979	55.522	1
325	2.06087	74.6667	45.4798	38.875	1		326	7.69565	10	-0.122362		325	8.21739	160	47.3616	52.847	1
326	2.10435	74.6667	45.4743	38.988	1		327	7.85217	10	-0.124456		326	8.24348	160	47.3787	52.78	1
327	2.16522	74.6667	45.472	38.818	1		328	7.97391	10	-0.12375		327	9.17391	160	47.5957	51.471	1
328	2.16522	74.6667	45.4756	38.948	1		329	9.1913	10	-0.139694		328	10.5391	160	47.897	49.606	1
329	2.73913	74.6667	45.4567	39.002	1		330	12.0435	10	-0.174937		329	11.8435	160	48.2263	47.864	1
330	2.74783	74.6667	45.4507	39.155	1		331	16.3739	10	-0.21895		330	11.9478	160	48.2513	47.601	1
331	3.51304	74.6667	45.4365	39.217	1		332	25.2087	10	-0.286606		331	13.9565	160	48.6987	45.368	1
332	3.94783	74.6667	45.4453	39.082	1							332	21.3652	160	50.3792	38.355	1
333	3.94783	74.6667	45.4439	38.95	1							333	23.087	160	50.7602	37.017	1
334	3.98261	74.6667	45.4409	38.874	1							334	23.9217	160	50.9461	36.251	1
335	4.46087	74.6667	45.435	39.079	1							335	26.8696	160	51.6204	34.326	1
336	4.48696	74.6667	45.4335	38.954	1							336	2.86957	0	44.8397	102.871	2
337	4.52174	74.6667	45.4419	38.989	1							337	3.27826	0	44.7594	103.513	2
338	4.65217	74.6667	45.4492	38.928	1							338	4.8	0	44.4029	106.434	2
339	6.2	74.6667	45.4333	39.115	1							339	6.31304	0	44.0207	109.246	2
340	6.5913	74.6667	45.4153	39.26	1							340	10.2261	0	43.1905	115.767	2
341	7.12174	74.6667	45.4373	39.353	1							341	10.5391	0	43.0891	116.391	2
342	7.18261	74.6667	45.4373	39.226	1							342	10.5391	0	43.0953	116.445	2
343	7.69565	74.6667	45.4163	39.271	1							343	11.4522	0	42.8959	118.04	2
344	7.97391	74.6667	45.3945	39.371	1							344	12.1043	0	42.718	119.276	2
345	7.97391	74.6667	45.3994	39.415	1							345	13.3826	0	42.4595	121.058	2
346	8.95652	74.6667	45.39	39.406	1							346	13.4609	0	42.4552	121.131	2
347	8.95652	74.6667	45.3919	39.388	1							347	14.8957	0	42.0948	123.509	2
348	10.0522	74.6667	45.3803	39.486	1							348	20.0087	0	40.9409	130.999	2
349	16.087	74.6667	45.2944	39.736	1							349	66.1304	0	30.449	181.958	2
350	18.6261	74.6667	45.2567	39.949	1							350	2.86957	10.6667	45.0052	101.845	2
351	25.2087	74.6667	45.1665	40.287	1							351	3.27826	10.6667	44.9218	102.574	2
352	0.347826	85.3333	45.5332	38.502	1							352	4.8	10.6667	44.5596	105.143	2
353	0.347826	85.3333	45.5321	38.521	1							353	6.31304	10.6667	44.2378	107.534	2
354	0.452174	85.3333	45.541	38.486	1							354	10.2261	10.6667	43.5318	112.707	2
355	0.504348	85.3333	45.544	38.223	1							355	10.5391	10.6667	43.4542	113.69	2
356	0.591304	85.3333	45.5431	38.422	1							356	10.5391	10.6667	43.4316	113.393	2
357	0.591304	85.3333	45.5376	38.53	1							357	11.4522	10.6667	43.2518	114.82	2
358	0.66087	85.3333	45.5237	38.618	1							358	12.1043	10.6667	43.1325	116.056	2
359	0.713043	85.3333	45.526	38.661	1							359	13.3826	10.6667	42.9066	117.786	2
360	0.721739	85.3333	45.5293	38.406	1							360	13.4609	10.6667	42.8932	117.967	2
361	0.817391	85.3333	45.5339	38.406	1							361	14.8957	10.6667	42.5545	119.891	2
362	0.904348	85.3333	45.5267	38.674	1							362	20.0087	10.6667	41.5742	126.495	2
363	0.956522	85.3333	45.5418	38.584	1							363	66.1304	10.6667	32.4846	169.972	2
364	0.956522	85.3333	45.5284	38.484	1							364	2.86957	21.3333	45.0056	101.45	2
365	1.09565	85.3333	45.5172	38.539	1							365	3.27826	21.3333	45.0135	101.573	2
366	1.23478	85.3333	45.5231	38.654	1							366	4.8	21.3333	44.737	103.785	2
367	1.38261	85.3333	45.5038	38.853	1							367	6.31304	21.3333	44.4894	105.784	2
368	1.6	85.3333	45.5141	38.741	1							368	10.2261	21.3333	43.8118	110.904	2
369	2.06087	85.3333	45.5197	38.494	1							369	10.5391	21.3333	43.7329	111.531	2
370	2.10435	85.3333	45.5505	38.281	1							370	10.5391	21.3333	43.7326	111.409	2
371	2.16522	85.3333	45.5415	38.36	1							371	11.4522	21.3333	43.6063	112.253	2
372	2.16522	85.3333	45.5461	38.345	1							372	12.1043	21.3333	43.4901	113.518	2
373	2.73913	85.3333	45.5479	38.12	1							373	13.3826	21.3333	43.2935	114.445	2
374	2.74783	85.3333	45.5491	38.225	1							374	13.4609	21.3333	43.2673	114.877	2
375	3.51304	85.3333	45.5622	38.369	1							375	14.8957	21.3333	43.0081	116.72	2
376	3.94783	85.3333	45.5778	38.28	1							376	20.0087	21.3333	42.1922	122.122	2
377	3.94783	85.3333	45.5606	38.514	1							377	66.1304	21.3333	34.4593	158.719	2
378	3.98261	85.3333	45.572	38.436	1							378	2.86957	32	45.1216	100.287	2
379	4.46087	85.3333	45.59	38.225	1							379	3.27826	32	45.0696	101.035	2
380	4.48696	85.3333	45.5967	38.14	1							380	4.8	32	44.8616	102.363	2
381	4.52174	85.3333	45.5932	38.051	1							381	6.31304	32	44.6567	103.785	2
382	4.65217	85.3333	45.5836	38.203	1							382	10.2261	32	44.1079	108.55	2
383	6.2	85.3333	45.6034	37.96	1							383	10.5391	32	44.0574	108.647	2
384	6.5913	85.3333	45.601	38.107	1							384	10.5391	32	44.0502	108.734	2
385	7.12174	85.3333	45.6115	37.905	1							385	11.4522	32	43.9568	109.386	2
386	7.18261	85.3333	45.6261	37.931	1							386	12.1043	32	43.8476	109.98	2
387	7.69565	85.3333	45.6565	37.73	1							387	13.3826	32	43.7281	111.279	2
388	7.97391	85.3333	45.677	37.4	1							388	13.4609	32	43.6854	111.714	2
389	7.97391	85.3333	45.6665	37.48	1							389	14.8957	32	43.4613	113.038	2
390	8.95652	85.3333	45.6702	37.73	1							390	20.0087	32	42.7756	117.717	2
391	8.95652	85.3333	45.6513	37.69	1							391	66.1304	32	36.4727	147.093	2
392	10.0522	85.3333	45.6691	37.688	1							392	2.86957	42.6667	45.2164	99.799	2
393	16.087	85.3333	45.763	37.128	1							393	3.27826	42.6667	45.2213	99.972	2
394	18.6261	85.3333	45.8171	36.996	1							394	4.8	42.6667	45.0339	101.357	2
395	25.2087	85.3333	45.9107	36.886	1							395	6.31304	42.6667	44.8466	102.818	2
396	0.347826	96	45.5049	38.533	1							396	10.2261	42.6667	44.4366	105.989	2
397	0.347826	96	45.524	38.359	1							397	10.5391	42.6667	44.4091	106.017	2
398	0.452174	96	45.54	38.359	1							398	10.5391	42.6667	44.4494	105.847	2
399	0.504348	96	45.5372	38.474	1							399	11.4522	42.6667	44.3307	106.828	2
400	0.591304	96	45.5311	38.673	1							400	12.1043	42.6667	44.2422	107.469	2
401	0.591304	96	45.5314	38.47	1							401	13.3826	42.6667	44.1232	108.061	2
402	0.66087	96	45.5314	38.395	1							402	13.4609	42.6667	44.0981	108.438	2
403	0.713043	96	45.542	38.503	1							403	14.8957	42.6667	43.9184	109.751	2
404	0.721739	96	45.536	38.675	1							404	20.0087	42.6667	43.4095	113.055	2
405	0.817391	96	45.5385	38.604	1							405	66.1304	42.6667	38.4982	135.536	2
406	0.904348	96	45.5605	38.339	1							406	2.86957	53.3333	45.2921	99.334	2
407	0.956522	96	45.5594	38.336	1							407	3.27826	53.3333	45.2377	99.503	2
408	0.956522	96	45.5439	38.422	1							408	4.8	53.3333	45.1223	100.694	2
409	1.09565	96	45.5692	38.27	1							409	6.31304	53.3333	45.0328	101.14	2
410	1.23478	96	45.5685	38.34	1							410	10.2261	53.3333	44.7104	103.656	2
411	1.38261	96	45.5779	38.201	1							411	10.5391	53.3333	44.6897	103.956	2
412	1.6	96	45.5806	38.37	1							412	10.5391	53.3333	44.7004	103.907	2
413	2.06087	96	45.5983	38.137	1							413	11.4522	53.3333	44.6514	104.227	2
414	2.10435	96	45.5966	37.926	1							414	12.1043	53.3333	44.5669	104.677	2
415	2.16522	96	45.6037	37.977	1							415	13.3826	53.3333	44.4754	105.646	2
416	2.16522	96	45.591	38.196	1							416	13.4609	53.3333	44.4743	105.379	2
417	2.73913	96	45.6131	37.964	1							417	14.8957	53.3333	44.3235	106.388	2
418	2.74783	96	45.6131	37.938	1							418	20.0087	53.3333	43.9767	108.713	2
419	3.51304	96	45.6374	37.887	1							419	66.1304	53.3333	40.4622	124.836	2
420	3.94783	96	45.6536	37.612	1							420	2.86957	64	45.3289	98.801	2
421	3.94783	96	45.6546	37.486	1							421	3.27826	64	45.3421	98.598	2
422	3.98261	96	45.6357	37.869	1							422	4.8	64	45.2711	99.059	2
423	4.46087	96	45.6831	37.47	1							423	6.31304	64	45.2367	99.609	2
424	4.48696	96	45.6879	37.353	1							424	10.2261	64	45.0692	100.878	2
425	4.52174	96	45.7044	37.441	1							425	10.5391	64	45.0154	101.406	2
426	4.65217	96	45.7041	37.492	1							426	10.5391	64	45.0181	101.054	2
427	6.2	96	45.7591	37.202	1							427	11.4522	64	44.967	101.466	2
428	6.5913	96	45.7756	37.069	1							428	12.1043	64	44.9385	101.663	2
429	7.12174	96	45.8074	36.817	1							429	13.3826	64	44.8742	102.305	2
430	7.18261	96	45.8074	36.854	1							430	13.4609	64	44.8756	101.986	2
431	7.69565	96	45.8419	36.733	1							431	14.8957	64	44.8338	102.721	2
432	7.97391	96	45.8513	36.583	1							432	20.0087	64	44.6236	103.843	2
433	7.97391	96	45.8589	36.381	1							433	66.1304	64	42.4974	113.212	2
434	8.95652	96	45.9066	36.185	1							434	2.86957	74.6667	45.417	98.146	2
435	8.95652	96	45.9078	36.122	1							435	3.27826	74.6667	45.4218	98.092	2
436	10.0522	96	45.9605	35.899	1							436	4.8	74.6667	45.3857	98.477	2
437	16.087	96	46.2236	34.656	1							437	6.31304	74.6667	45.3894	98.25	2
438	18.6261	96	46.3289	34.428	1							438	10.2261	74.6667	45.3146	98.68	2
439	25.2087	96	46.6266	33.573	1							439	10.5391	74.6667	45.3236	98.652	2
440	0.347826	106.667	45.5141	38.622	1							440	10.5391	74.6667	45.3727	98.561	2
441	0.347826	106.667	45.5247	38.389	1							441	11.4522	74.6667	45.3188	99.128	2
442	0.452174	106.667	45.535	38.543	1							442	12.1043	74.6667	45.2909	99.166	2
443	0.504348	106.667	45.529	38.405	1							443	13.3826	74.6667	45.2684	99.364	2
444	0.591304	106.667	45.535	38.41	1							444	13.4609	74.6667	45.2797	99.456	2
445	0.591304	106.667	45.5337	38.474	1							445	14.8957	74.6667	45.2653	99.316	2
446	0.66087	106.667	45.5463	38.46	1							446	20.0087	74.6667	45.2126	99.907	2
447	0.713043	106.667	45.5548	38.298	1							447	66.1304	74.6667	44.5101	102.645	2
448	0.721739	106.667	45.5557	38.393	1							448	2.86957	85.3333	45.5617	97.13	2
449	0.817391	106.667	45.5534	38.347	1							449	3.27826	85.3333	45.5616	96.983	2
450	0.904348	106.667	45.5607	38.149	1							450	4.8	85.3333	45.5778	96.782	2
451	0.956522	106.667	45.5664	38.397	1							451	6.31304	85.3333	45.6276	96.319	2
452	0.956522	106.667	45.5753	38.493	1							452	10.2261	85.3333	45.6674	95.971	2
453	1.09565	106.667	45.5893	38.092	1							453	10.5391	85.3333	45.6995	95.891	2
454	1.23478	106.667	45.5914	38.081	1							454	10.5391	85.3333	45.7007	96.082	2
455	1.38261	106.667	45.5918	38.171	1							455	11.4522	85.3333	45.7032	95.912	2
456	1.6	106.667	45.6163	38.05	1							456	12.1043	85.3333	45.7315	95.762	2
457	2.06087	106.667	45.6479	37.892	1							457	13.3826	85.3333	45.7482	95.7	2
458	2.10435	106.667	45.6551	37.852	1							458	13.4609	85.3333	45.7243	95.618	2
459	2.16522	106.667	45.6597	37.645	1							459	14.8957	85.3333	45.7276	95.835	2
460	2.16522	106.667	45.666	37.641	1							460	20.0087	85.3333	45.8216	95.124	2
461	2.73913	106.667	45.7072	37.535	1							461	66.1304	85.3333	46.5295	92.343	2
462	2.74783	106.667	45.6948	37.703	1							462	2.86957	96	45.6481	96.652	2
463	3.51304	106.667	45.7642	37.179	1							463	3.27826	96	45.5967	96.608	2
464	3.94783	106.667	45.773	36.85	1							464	4.8	96	45.6823	96.18	2
465	3.94783	106.667	45.7886	36.737	1							465	6.31304	96	45.792	95.279	2
466	3.98261	106.667	45.7928	36.811	1							466	10.2261	96	45.9657	94.076	2
467	4.46087	106.667	45.8321	36.618	1							467	10.5391	96	45.9688	94.419	2
468	4.48696	106.667	45.8403	36.416	1							468	10.5391	96	45.9801	94.188	2
469	4.52174	106.667	45.8476	36.367	1							469	11.4522	96	46.0171	93.582	2
470	4.65217	106.667	45.8471	36.414	1							470	12.1043	96	46.0374	93.279	2
471	6.2	106.667	45.9627	36.053	1							471	13.3826	96	46.0922	93.22	2
472	6.5913	106.667	45.9857	35.998	1							472	13.4609	96	46.0908	93.246	2
473	7.12174	106.667	46.0249	35.701	1							473	14.8957	96	46.2072	92.252	2
474	7.18261	106.667	46.0339	35.397	1							474	20.0087	96	46.4295	91.182	2
475	7.69565	106.667	46.0802	35.111	1							475	66.1304	96	48.5232	82.783	2
476	7.97391	106.667	46.123	35.04	1							476	2.86957	106.667	45.7683	95.645	2
477	7.97391	106.667	46.1225	35.018	1							477	3.27826	106.667	45.7805	95.362	2
478	8.95652	106.667	46.1919	34.458	1							478	4.8	106.667	45.874	94.949	2
479	8.95652	106.667	46.1907	34.759	1							479	6.31304	106.667	45.9797	93.616	2
480	10.0522	106.667	46.2643	34.243	1							480	10.2261	106.667	46.3012	91.458	2
481	16.087	106.667	46.7364	32.379	1							481	10.5391	106.667	46.303	91.381	2
482	18.6261	106.667	46.9136	31.638	1							482	10.5391	106.667	46.2907	91.265	2
483	25.2087	106.667	47.4125	30.135	1							483	11.4522	106.667	46.4049	90.595	2
484	0.347826	117.333	45.5573	38.334	1							484	12.1043	106.667	46.4176	90.607	2
485	0.347826	117.333	45.5613	38.256	1							485	13.3826	106.667	46.4904	89.995	2
486	0.452174	117.333	45.5788	38.284	1							486	13.4609	106.667	46.5465	89.496	2
487	0.504348	117.333	45.5736	38.32	1							487	14.8957	106.667	46.6262	88.901	2
488	0.591304	117.333	45.5838	38.441	1							488	20.0087	106.667	47.0469	86.313	2
489	0.591304	117.333	45.5864	38.212	1							489	66.1304	106.667	50.5551	73.021	2
490	0.66087	117.333	45.5892	38.121	1							490	2.86957	117.333	45.8173	94.984	2
491	0.713043	117.333	45.5906	38.153	1							491	3.27826	117.333	45.8817	94.223	2
492	0.721739	117.333	45.5761	37.994	1							492	4.8	117.333	46.0268	93.209	2
493	0.817391	117.333	45.5945	37.867	1							493	6.31304	117.333	46.2028	92.007	2
494	0.904348	117.333	45.5975	37.836	1							494	10.2261	117.333	46.6252	88.969	2
495	0.956522	117.333	45.6226	37.689	1							495	10.5391	117.333	46.6493	88.695	2
496	0.956522	117.333	45.6156	37.913	1							496	10.5391	117.333	46.6829	88.427	2
497	1.09565	117.333	45.6458	37.803	1							497	11.4522	117.333	46.7249	88.206	2
498	1.23478	117.333	45.6503	37.686	1							498	12.1043	117.333	46.8118	87.446	2
499	1.38261	117.333	45.6519	37.526	1							499	13.3826	117.333	46.9651	86.388	2
500	1.6	117.333	45.6737	37.502	1							500	13.4609	117.333	46.9407	86.644	2
501	2.06087	117.333	45.7291	37.06	1							501	14.8957	117.333	47.1349	85.227	2
502	2.10435	117.333	45.7457	36.86	1							502	20.0087	117.333	47.6449	82.059	2
503	2.16522	117.333	45.7546	36.626	1							503	66.1304	117.333	52.5388	63.771	2
504	2.16522	117.333	45.7655	36.889	1							504	2.86957	128	45.9212	94.208	2
505	2.73913	117.333	45.8178	36.329	1							505	3.27826	128	45.8922	94.293	2
506	2.74783	117.333	45.8151	36.325	1							506	4.8	128	46.1003	92.536	2
507	3.51304	117.333	45.893	36.08	1							507	6.31304	128	46.3218	91.029	2
508	3.94783	117.333	45.9461	35.707	1							508	10.2261	128	46.879	86.846	2
509	3.94783	117.333	45.941	35.925	1							509	10.5391	128	46.9	86.608	2
510	3.98261	117.333	45.944	35.723	1							510	10.5391	128	46.9252	86.299	2
511	4.46087	117.333	45.9688	35.54	1							511	11.4522	128	47.0395	85.88	2
512	4.48696	117.333	45.9809	35.72	1							512	12.1043	128	47.1306	85.023	2
513	4.52174	117.333	45.9847	35.609	1							513	13.3826	128	47.3049	83.731	2
514	4.65217	117.333	45.9998	35.687	1							514	13.4609	128	47.2852	83.757	2
515	6.2	117.333	46.164	34.316	1							515	14.8957	128	47.4775	82.502	2
516	6.5913	117.333	46.2143	34.174	1							516	20.0087	128	48.2323	78.152	2
517	7.12174	117.333	46.2668	34.237	1							517	66.1304	128	54.4889	55.439	2
518	7.18261	117.333	46.2667	33.979	1							518	2.86957	138.667	46.023	93.447	2
519	7.69565	117.333	46.3162	33.853	1							519	3.27826	138.667	46.0567	93.181	2
520	7.97391	117.333	46.3586	33.674	1							520	4.8	138.667	46.3441	91.05	2
521	7.97391	117.333	46.3743	33.505	1							521	6.31304	138.667	46.5925	88.976	2
522	8.95652	117.333	46.4855	33.051	1							522	10.2261	138.667	47.2448	84.239	2
523	8.95652	117.333	46.4788	33.121	1							523	10.5391	138.667	47.2663	83.716	2
524	10.0522	117.333	46.5927	32.527	1							524	10.5391	138.667	47.27	83.901	2
525	16.087	117.333	47.2214	30.091	1							525	11.4522	138.667	47.4309	82.707	2
526	18.6261	117.333	47.4956	29.074	1							526	12.1043	138.667	47.5174	82.012	2
527	25.2087	117.333	48.1896	27.211	1							527	13.3826	138.667	47.7322	80.765	2
528	0.347826	128	45.5612	38.24	1							528	13.4609	138.667	47.7666	80.34	2
529	0.347826	128	45.5574	38.238	1							529	14.8957	138.667	48.0058	78.864	2
530	0.452174	128	45.5861	38.076	1							530	20.0087	138.667	48.8373	74.042	2
531	0.504348	128	45.6084	37.752	1							531	66.1304	138.667	56.612	47.099	2
532	0.591304	128	45.6217	37.704	1							532	2.86957	149.333	46.1006	92.48	2
533	0.591304	128	45.6203	37.836	1							533	3.27826	149.333	46.1242	92.395	2
534	0.66087	128	45.6259	37.842	1							534	4.8	149.333	46.4284	89.731	2
535	0.713043	128	45.6177	37.999	1							535	6.31304	149.333	46.7438	87.883	2
536	0.721739	128	45.6172	37.738	1							536	10.2261	149.333	47.5235	81.922	2
537	0.817391	128	45.6348	37.733	1							537	10.5391	149.333	47.6089	81.46	2
538	0.904348	128	45.6524	37.685	1							538	10.5391	149.333	47.5976	81.612	2
539	0.956522	128	45.6677	37.537	1							539	11.4522	149.333	47.7863	80.436	2
540	0.956522	128	45.6684	37.483	1							540	12.1043	149.333	47.8679	79.63	2
541	1.09565	128	45.6829	37.456	1							541	13.3826	149.333	48.1413	77.651	2
542	1.23478	128	45.7113	37.337	1							542	13.4609	149.333	48.1411	77.382	2
543	1.38261	128	45.7232	37.391	1							543	14.8957	149.333	48.4548	75.649	2
544	1.6	128	45.7536	37.348	1							544	20.0087	149.333	49.4669	69.783	2
545	2.06087	128	45.8263	36.789	1							545	66.1304	149.333	58.552	39.946	2
546	2.10435	128	45.8327	36.879	1							546	2.86957	160	46.1742	92.422	2
547	2.16522	128	45.8377	36.716	1							547	3.27826	160	46.2298	91.64	2
548	2.16522	128	45.8275	36.605	1							548	4.8	160	46.5801	88.953	2
549	2.73913	128	45.911	36.09	1							549	6.31304	160	46.937	86.337	2
550	2.74783	128	45.9088	36.136	1							550	10.2261	160	47.8364	79.826	2
551	3.51304	128	45.9956	35.631	1							551	10.5391	160	47.883	79.54	2
552	3.94783	128	46.048	35.251	1							552	10.5391	160	47.9186	79.289	2
553	3.94783	128	46.0453	35.199	1							553	11.4522	160	48.1014	78.268	2
554	3.98261	128	46.0438	35.228	1							554	12.1043	160	48.1888	77.345	2
555	4.46087	128	46.1093	35.026	1							555	13.3826	160	48.5559	75.093	2
556	4.48696	128	46.1037	35.002	1							556	13.4609	160	48.5736	74.688	2
557	4.52174	128	46.0971	35.029	1							557	14.8957	160	48.885	72.486	2
558	4.65217	128	46.1068	34.761	1							558	20.0087	160	50.0421	66.152	2
559	6.2	128	46.3236	33.511	1							559	66.1304	160	60.5791	33.526	2
560	6.5913	128	46.3851	33.272	1							560	2.32174	0	44.978	141.514	3
561	7.12174	128	46.4855	32.804	1							561	2.86957	0	44.883	142.001	3
562	7.18261	128	46.4746	32.986	1							562	4.85217	0	44.3714	145.482	3
563	7.69565	128	46.5515	32.429	1							563	14.3652	0	42.2194	159.622	3
564	7.97391	128	46.5859	32.118	1							564	21.5478	0	40.5782	169.752	3
565	7.97391	128	46.5921	32.04	1							565	30.1565	0	38.6471	180.799	3
566	8.95652	128	46.733	31.294	1							566	48.2609	0	34.6102	201.23	3
567	8.95652	128	46.7252	31.32	1							567	75.6261	0	28.2999	228.558	3
568	10.0522	128	46.8924	30.711	1							568	2.32174	10.6667	45.1216	140.568	3
569	16.087	128	47.7157	27.556	1							569	2.86957	10.6667	44.9486	141.772	3
570	18.6261	128	48.0744	26.495	1							570	4.85217	10.6667	44.5386	144.311	3
571	25.2087	128	48.9568	24.069	1							571	14.3652	10.6667	42.6706	156.707	3
572	0.347826	138.667	45.5433	38.392	1							572	21.5478	10.6667	41.2636	165.275	3
573	0.347826	138.667	45.5565	38.406	1							573	30.1565	10.6667	39.5592	174.967	3
574	0.452174	138.667	45.5714	38.201	1							574	48.2609	10.6667	36.0265	192.893	3
575	0.504348	138.667	45.5906	38.049	1							575	75.6261	10.6667	30.6405	215.954	3
576	0.591304	138.667	45.5853	38.075	1							576	2.32174	21.3333	45.0955	140.455	3
577	0.591304	138.667	45.5968	38.013	1							577	2.86957	21.3333	44.9953	141.3	3
578	0.66087	138.667	45.5959	38.121	1							578	4.85217	21.3333	44.6804	143.332	3
579	0.713043	138.667	45.5998	37.982	1							579	14.3652	21.3333	43.0779	153.912	3
580	0.721739	138.667	45.6251	37.987	1							580	21.5478	21.3333	41.8894	160.979	3
581	0.817391	138.667	45.6245	37.831	1							581	30.1565	21.3333	40.4859	169.274	3
582	0.904348	138.667	45.6404	37.608	1							582	48.2609	21.3333	37.4589	184.55	3
583	0.956522	138.667	45.6394	37.725	1							583	75.6261	21.3333	32.8667	204.01	3
584	0.956522	138.667	45.6391	37.641	1							584	2.32174	32	45.2211	139.812	3
585	1.09565	138.667	45.6658	37.466	1							585	2.86957	32	45.131	140.455	3
586	1.23478	138.667	45.6901	37.334	1							586	4.85217	32	44.8916	142.11	3
587	1.38261	138.667	45.702	37.314	1							587	14.3652	32	43.5892	150.663	3
588	1.6	138.667	45.7483	36.995	1							588	21.5478	32	42.6001	156.486	3
589	2.06087	138.667	45.8444	36.458	1							589	30.1565	32	41.4263	163.349	3
590	2.10435	138.667	45.8687	36.135	1							590	48.2609	32	38.9549	176.06	3
591	2.16522	138.667	45.8797	36.327	1							591	75.6261	32	35.1794	191.548	3
592	2.16522	138.667	45.8808	36.314	1							592	2.32174	42.6667	45.2805	139.603	3
593	2.73913	138.667	45.9634	35.816	1							593	2.86957	42.6667	45.228	139.906	3
594	2.74783	138.667	45.9526	35.797	1							594	4.85217	42.6667	44.971	141.43	3
595	3.51304	138.667	46.0792	34.869	1							595	14.3652	42.6667	43.9987	148.221	3
596	3.94783	138.667	46.1527	34.452	1							596	21.5478	42.6667	43.282	152.427	3
597	3.94783	138.667	46.1623	34.436	1							597	30.1565	42.6667	42.3233	157.799	3
598	3.98261	138.667	46.1856	34.299	1							598	48.2609	42.6667	40.4139	167.399	3
599	4.46087	138.667	46.256	33.818	1							599	75.6261	42.6667	37.4934	179.498	3
600	4.48696	138.667	46.2721	33.854	1							600	2.32174	53.3333	45.3383	139.112	3
601	4.52174	138.667	46.2876	33.859	1							601	2.86957	53.3333	45.281	139.238	3
602	4.65217	138.667	46.2948	33.792	1							602	4.85217	53.3333	45.1447	140.158	3
603	6.2	138.667	46.5442	32.348	1							603	14.3652	53.3333	44.4459	144.807	3
604	6.5913	138.667	46.6065	31.971	1							604	21.5478	53.3333	43.9149	148.239	3
605	7.12174	138.667	46.7066	31.524	1							605	30.1565	53.3333	43.3073	151.81	3
606	7.18261	138.667	46.7161	31.381	1							606	48.2609	53.3333	41.895	158.831	3
607	7.69565	138.667	46.8018	30.85	1							607	75.6261	53.3333	39.8144	167.263	3
608	7.97391	138.667	46.8386	30.616	1							608	2.32174	64	45.472	138.456	3
609	7.97391	138.667	46.8269	30.61	1							609	2.86957	64	45.4456	138.506	3
610	8.95652	138.667	46.9982	29.846	1							610	4.85217	64	45.3514	138.906	3
611	8.95652	138.667	47.0097	30.05	1							611	14.3652	64	44.8744	142.011	3
612	10.0522	138.667	47.186	29.147	1							612	21.5478	64	44.5805	143.601	3
613	16.087	138.667	48.1935	25.654	1							613	30.1565	64	44.2225	145.928	3
614	18.6261	138.667	48.612	24.319	1							614	48.2609	64	43.408	149.871	3
615	25.2087	138.667	49.7078	21.458	1							615	75.6261	64	42.1	155.371	3
616	0.347826	149.333	45.5847	38.414	1							616	2.32174	74.6667	45.4971	138.086	3
617	0.347826	149.333	45.5789	38.439	1							617	2.86957	74.6667	45.4679	138.406	3
618	0.452174	149.333	45.5837	38.593	1							618	4.85217	74.6667	45.4735	138.134	3
619	0.504348	149.333	45.5863	38.437	1							619	14.3652	74.6667	45.3088	139.193	3
620	0.591304	149.333	45.6076	38.071	1							620	21.5478	74.6667	45.1983	139.735	3
621	0.591304	149.333	45.6109	38.011	1							621	30.1565	74.6667	45.1046	140.347	3
622	0.66087	149.333	45.6477	38.021	1							622	48.2609	74.6667	44.8395	141.691	3
623	0.713043	149.333	45.6451	37.892	1							623	75.6261	74.6667	44.3982	143.423	3
624	0.721739	149.333	45.6611	37.844	1							624	2.32174	85.3333	45.5745	137.41	3
625	0.817391	149.333	45.6766	37.834	1							625	2.86957	85.3333	45.5346	137.49	3
626	0.904348	149.333	45.7015	37.607	1							626	4.85217	85.3333	45.5903	137.452	3
627	0.956522	149.333	45.6933	37.505	1							627	14.3652	85.3333	45.7821	136.24	3
628	0.956522	149.333	45.6939	37.482	1							628	21.5478	85.3333	45.8632	135.576	3
629	1.09565	149.333	45.7369	37.359	1							629	30.1565	85.3333	45.9835	134.943	3
630	1.23478	149.333	45.7635	36.925	1							630	48.2609	85.3333	46.285	133.744	3
631	1.38261	149.333	45.7797	37.056	1							631	75.6261	85.3333	46.7044	132.049	3
632	1.6	149.333	45.818	36.732	1							632	2.32174	96	45.6504	137.028	3
633	2.06087	149.333	45.8996	36.065	1							633	2.86957	96	45.7205	136.357	3
634	2.10435	149.333	45.9222	35.967	1							634	4.85217	96	45.7806	136.27	3
635	2.16522	149.333	45.9328	35.809	1							635	14.3652	96	46.1856	133.68	3
636	2.16522	149.333	45.9413	35.889	1							636	21.5478	96	46.5266	131.452	3
637	2.73913	149.333	46.0526	35.506	1							637	30.1565	96	46.8659	129.781	3
638	2.74783	149.333	46.0336	35.243	1							638	48.2609	96	47.7013	125.197	3
639	3.51304	149.333	46.1803	34.523	1							639	75.6261	96	48.9464	120.815	3
640	3.94783	149.333	46.249	34.054	1							640	2.32174	106.667	45.6266	136.909	3
641	3.94783	149.333	46.2524	34.026	1							641	2.86957	106.667	45.7163	136.296	3
642	3.98261	149.333	46.2495	34.027	1							642	4.85217	106.667	45.8303	135.48	3
643	4.46087	149.333	46.3698	33.38	1							643	14.3652	106.667	46.5863	130.667	3
644	4.48696	149.333	46.3722	33.313	1							644	21.5478	106.667	47.1524	127.095	3
645	4.52174	149.333	46.3763	33.362	1							645	30.1565	106.667	47.8257	123.395	3
646	4.65217	149.333	46.4113	32.995	1							646	48.2609	106.667	49.1266	117.641	3
647	6.2	149.333	46.7434	31.349	1							647	75.6261	106.667	51.2311	110.079	3
648	6.5913	149.333	46.8208	30.934	1							648	2.32174	117.333	45.8152	135.859	3
649	7.12174	149.333	46.9223	30.581	1							649	2.86957	117.333	45.8473	135.745	3
650	7.18261	149.333	46.9401	30.356	1							650	4.85217	117.333	46.0629	134.079	3
651	7.69565	149.333	47.0324	29.937	1							651	14.3652	117.333	47.0877	127.433	3
652	7.97391	149.333	47.0893	29.655	1							652	21.5478	117.333	47.7974	123.026	3
653	7.97391	149.333	47.0982	29.578	1							653	30.1565	117.333	48.7016	118.07	3
654	8.95652	149.333	47.2623	28.771	1							654	48.2609	117.333	50.6902	109.194	3
655	8.95652	149.333	47.2684	28.747	1							655	75.6261	117.333	53.578	99	3
656	10.0522	149.333	47.492	27.788	1							656	2.32174	128	45.8302	135.835	3
657	16.087	149.333	48.6824	23.552	1							657	2.86957	128	45.8709	135.558	3
658	18.6261	149.333	49.1806	22.073	1							658	4.85217	128	46.1137	133.824	3
659	25.2087	149.333	50.4801	19.004	1							659	14.3652	128	47.3992	125.278	3
660	0.347826	160	45.6154	37.907	1							660	21.5478	128	48.3697	119.483	3
661	0.347826	160	45.6346	37.702	1							661	30.1565	128	49.5622	112.746	3
662	0.452174	160	45.6649	37.732	1							662	48.2609	128	52.0785	101.766	3
663	0.504348	160	45.6727	37.568	1							663	75.6261	128	55.823	89.011	3
664	0.591304	160	45.68	37.612	1							664	2.32174	138.667	45.9315	135.029	3
665	0.591304	160	45.6568	37.646	1							665	2.86957	138.667	46.013	134.611	3
666	0.66087	160	45.6758	37.535	1							666	4.85217	138.667	46.3351	132.289	3
667	0.713043	160	45.7075	37.196	1							667	14.3652	138.667	47.9607	121.493	3
668	0.721739	160	45.722	37.267	1							668	21.5478	138.667	49.1508	114.75	3
669	0.817391	160	45.7325	37.162	1							669	30.1565	138.667	50.6005	107.051	3
670	0.904348	160	45.746	37.048	1							670	48.2609	138.667	53.6539	93.316	3
671	0.956522	160	45.7573	37.077	1							671	75.6261	138.667	58.1782	78.589	3
672	0.956522	160	45.7472	36.947	1							672	2.32174	149.333	45.9964	134.54	3
673	1.09565	160	45.7612	36.898	1							673	2.86957	149.333	46.1088	133.914	3
674	1.23478	160	45.807	36.732	1							674	4.85217	149.333	46.4784	131.334	3
675	1.38261	160	45.8382	36.447	1							675	14.3652	149.333	48.3494	119.118	3
676	1.6	160	45.9093	36.081	1							676	21.5478	149.333	49.7474	110.879	3
677	2.06087	160	46.0123	35.506	1							677	30.1565	149.333	51.4753	101.633	3
678	2.10435	160	46.0246	35.53	1							678	48.2609	149.333	55.0606	86.279	3
679	2.16522	160	46.0365	35.359	1							679	75.6261	149.333	60.4804	68.964	3
680	2.16522	160	46.0116	35.371	1							680	2.32174	160	46.0913	134.235	3
681	2.73913	160	46.1397	34.564	1							681	2.86957	160	46.2206	133.128	3
682	2.74783	160	46.1458	34.628	1							682	4.85217	160	46.7017	130.036	3
683	3.51304	160	46.3307	33.621	1							683	14.3652	160	48.8406	116.145	3
684	3.94783	160	46.4265	32.972	1							684	21.5478	160	50.4437	106.402	3
685	3.94783	160	46.4324	32.962	1							685	30.1565	160	52.3979	96.37	3
686	3.98261	160	46.4393	32.988	1							686	48.2609	160	56.5364	78.293	3
687	4.46087	160	46.5465	32.275	1							687	75.6261	160	62.7989	59.513	3
688	4.48696	160	46.5341	32.287	1							688	2.21739	0	45.0206	76.304	4
689	4.52174	160	46.546	31.901	1							689	2.21739	0	45.0246	76.001	4
690	4.65217	160	46.5892	31.892	1							690	2.21739	0	45.0311	76.139	4
691	6.2	160	46.9401	30.074	1							691	2.86957	0	44.8943	76.914	4
692	6.5913	160	47.0248	29.533	1							692	5.03478	0	44.3914	80.674	4
693	7.12174	160	47.1435	29.135	1							693	5.29565	0	44.3355	81.189	4
694	7.18261	160	47.155	28.983	1							694	6.49565	0	44.0652	82.866	4
695	7.69565	160	47.291	28.448	1							695	7.90435	0	43.7672	85.131	4
696	7.97391	160	47.3506	28.048	1							696	9.05217	0	43.4974	86.846	4
697	7.97391	160	47.3501	28.069	1							697	11.8435	0	42.8627	90.663	4
698	8.95652	160	47.5746	27.343	1							698	12.6435	0	42.6755	91.988	4
699	8.95652	160	47.5724	27.259	1							699	14.4522	0	42.2477	94.602	4
700	10.0522	160	47.8243	26.133	1							700	19.2522	0	41.1344	101.075	4
701	16.087	160	49.1856	21.303	1							701	21.5478	0	40.6023	104.211	4
702	18.6261	160	49.7625	19.722	1							702	23.2174	0	40.24	106.123	4
703	25.2087	160	51.2891	16.302	1							703	26.8696	0	39.4043	110.133	4
704	0.504348	0	45.4085	30.002	2							704	26.8696	0	39.4068	110.119	4
705	0.591304	0	45.3854	30.128	2							705	2.21739	10.6667	45.0367	75.972	4
706	0.713043	0	45.3676	30.225	2							706	2.21739	10.6667	45.0316	75.993	4
707	0.721739	0	45.3614	30.093	2							707	2.21739	10.6667	45.032	76.107	4
708	0.956522	0	45.3086	30.404	2							708	2.86957	10.6667	44.91	77.011	4
709	1.2087	0	45.2459	30.769	2							709	5.03478	10.6667	44.4736	80.088	4
710	1.2087	0	45.2412	30.92	2							710	5.29565	10.6667	44.427	80.367	4
711	1.38261	0	45.2069	31.101	2							711	6.49565	10.6667	44.1859	82.247	4
712	1.6	0	45.162	31.354	2							712	7.90435	10.6667	43.8952	83.866	4
713	1.67826	0	45.1334	31.568	2							713	9.05217	10.6667	43.6649	85.383	4
714	1.76522	0	45.1163	31.629	2							714	11.8435	10.6667	43.1256	88.928	4
715	2.10435	0	45.0407	32.073	2							715	12.6435	10.6667	42.9756	90.056	4
716	2.10435	0	45.0388	32.074	2							716	14.4522	10.6667	42.6178	92.256	4
717	2.10435	0	45.022	32.305	2							717	19.2522	10.6667	41.6636	97.649	4
718	2.63478	0	44.9099	32.895	2							718	21.5478	10.6667	41.2247	100.257	4
719	2.73913	0	44.9079	33.078	2							719	23.2174	10.6667	40.9007	101.816	4
720	2.94783	0	44.8447	33.514	2							720	26.8696	10.6667	40.1699	105.546	4
721	3.01739	0	44.8242	33.328	2							721	26.8696	10.6667	40.1757	105.649	4
722	3.4087	0	44.7532	33.616	2							722	2.21739	21.3333	45.1423	75.092	4
723	3.48696	0	44.7362	33.818	2							723	2.21739	21.3333	45.1464	74.999	4
724	3.51304	0	44.7216	33.782	2							724	2.21739	21.3333	45.169	74.88	4
725	3.51304	0	44.7127	33.844	2							725	2.86957	21.3333	45.0557	75.751	4
726	3.81739	0	44.6359	34.189	2							726	5.03478	21.3333	44.6874	78.494	4
727	3.82609	0	44.6316	34.299	2							727	5.29565	21.3333	44.6396	78.815	4
728	3.82609	0	44.6263	34.318	2							728	6.49565	21.3333	44.4405	80.256	4
729	3.98261	0	44.5937	34.564	2							729	7.90435	21.3333	44.2032	81.987	4
730	4.03478	0	44.5888	34.458	2							730	9.05217	21.3333	44.0112	83.353	4
731	4.46087	0	44.4932	35.054	2							731	11.8435	21.3333	43.5297	86.628	4
732	4.46087	0	44.5027	35.001	2							732	12.6435	21.3333	43.3936	87.298	4
733	4.48696	0	44.5047	35.139	2							733	14.4522	21.3333	43.1043	89.106	4
734	4.96522	0	44.3852	35.912	2							734	19.2522	21.3333	42.2924	93.651	4
735	6.53043	0	44.0284	37.775	2							735	21.5478	21.3333	41.9138	95.558	4
736	6.66957	0	44.0125	37.799	2							736	23.2174	21.3333	41.6451	96.722	4
737	6.66957	0	44.0086	37.922	2							737	26.8696	21.3333	41.0359	99.838	4
738	6.86087	0	43.9644	38.204	2							738	26.8696	21.3333	41.0302	99.83	4
739	7.73913	0	43.7615	39.151	2							739	2.21739	32	45.1826	74.819	4
740	7.73913	0	43.7819	39.061	2							740	2.21739	32	45.1918	74.692	4
741	8.95652	0	43.4894	40.454	2							741	2.21739	32	45.1839	74.9	4
742	9.1913	0	43.4301	40.722	2							742	2.86957	32	45.0767	75.719	4
743	9.73043	0	43.3073	41.213	2							743	5.03478	32	44.7835	77.508	4
744	9.73043	0	43.3109	41.327	2							744	5.29565	32	44.7479	77.905	4
745	16.3739	0	41.8058	47.202	2							745	6.49565	32	44.5973	78.874	4
746	22.0435	0	40.5077	51.786	2							746	7.90435	32	44.4155	80.274	4
747	0.504348	10.6667	45.3845	29.871	2							747	9.05217	32	44.2642	81.302	4
748	0.591304	10.6667	45.3687	30.04	2							748	11.8435	32	43.8872	83.748	4
749	0.713043	10.6667	45.3471	30.293	2							749	12.6435	32	43.7695	84.564	4
750	0.721739	10.6667	45.3466	30.153	2							750	14.4522	32	43.5185	85.971	4
751	0.956522	10.6667	45.3065	30.416	2							751	19.2522	32	42.8631	89.799	4
752	1.2087	10.6667	45.2521	30.855	2							752	21.5478	32	42.5627	91.354	4
753	1.2087	10.6667	45.2502	30.836	2							753	23.2174	32	42.3304	92.681	4
754	1.38261	10.6667	45.2294	31.04	2							754	26.8696	32	41.8322	95.163	4
755	1.6	10.6667	45.1891	31.251	2							755	26.8696	32	41.8224	95.067	4
756	1.67826	10.6667	45.1864	31.184	2							756	2.21739	42.6667	45.2828	74.13	4
757	1.76522	10.6667	45.1673	31.362	2							757	2.21739	42.6667	45.2962	74.019	4
758	2.10435	10.6667	45.0794	31.743	2							758	2.21739	42.6667	45.2815	74.423	4
759	2.10435	10.6667	45.0961	31.682	2							759	2.86957	42.6667	45.2119	74.733	4
760	2.10435	10.6667	45.1044	31.761	2							760	5.03478	42.6667	44.9849	76.425	4
761	2.63478	10.6667	44.9915	32.188	2							761	5.29565	42.6667	44.9489	76.566	4
762	2.73913	10.6667	44.9727	32.348	2							762	6.49565	42.6667	44.8097	77.515	4
763	2.94783	10.6667	44.9213	32.675	2							763	7.90435	42.6667	44.6714	78.376	4
764	3.01739	10.6667	44.8862	33.027	2							764	9.05217	42.6667	44.5544	79.143	4
765	3.4087	10.6667	44.8218	33.481	2							765	11.8435	42.6667	44.2619	81.149	4
766	3.48696	10.6667	44.81	33.316	2							766	12.6435	42.6667	44.182	81.6	4
767	3.51304	10.6667	44.796	33.499	2							767	14.4522	42.6667	43.9907	82.68	4
768	3.51304	10.6667	44.7967	33.379	2							768	19.2522	42.6667	43.4892	85.539	4
769	3.81739	10.6667	44.7362	33.643	2							769	21.5478	42.6667	43.2447	87.111	4
770	3.82609	10.6667	44.7355	33.771	2							770	23.2174	42.6667	43.0703	87.816	4
771	3.82609	10.6667	44.7405	33.681	2							771	26.8696	42.6667	42.6761	89.697	4
772	3.98261	10.6667	44.7129	33.749	2							772	26.8696	42.6667	42.6619	89.812	4
773	4.03478	10.6667	44.6929	33.703	2							773	2.21739	53.3333	45.3674	73.358	4
774	4.46087	10.6667	44.6109	34.231	2							774	2.21739	53.3333	45.3679	73.585	4
775	4.46087	10.6667	44.6003	34.412	2							775	2.21739	53.3333	45.3672	73.654	4
776	4.48696	10.6667	44.6141	34.309	2							776	2.86957	53.3333	45.3244	73.763	4
777	4.96522	10.6667	44.522	34.789	2							777	5.03478	53.3333	45.1825	74.609	4
778	6.53043	10.6667	44.2016	36.617	2							778	5.29565	53.3333	45.1741	74.811	4
779	6.66957	10.6667	44.1888	36.657	2							779	6.49565	53.3333	45.0687	75.554	4
780	6.66957	10.6667	44.1882	36.608	2							780	7.90435	53.3333	44.9513	76.472	4
781	6.86087	10.6667	44.1478	36.838	2							781	9.05217	53.3333	44.8475	76.958	4
782	7.73913	10.6667	43.9755	37.809	2							782	11.8435	53.3333	44.6428	78.495	4
783	7.73913	10.6667	43.9566	37.582	2							783	12.6435	53.3333	44.5882	78.832	4
784	8.95652	10.6667	43.7178	38.947	2							784	14.4522	53.3333	44.4343	79.547	4
785	9.1913	10.6667	43.6727	38.959	2							785	19.2522	53.3333	44.0657	81.698	4
786	9.73043	10.6667	43.572	39.618	2							786	21.5478	53.3333	43.8915	82.742	4
787	9.73043	10.6667	43.5523	39.745	2							787	23.2174	53.3333	43.7739	83.21	4
788	16.3739	10.6667	42.2566	45.02	2							788	26.8696	53.3333	43.5046	84.488	4
789	22.0435	10.6667	41.1351	48.856	2							789	26.8696	53.3333	43.4962	84.459	4
790	0.504348	21.3333	45.4094	29.84	2							790	2.21739	64	45.4195	73.418	4
791	0.591304	21.3333	45.3903	30.043	2							791	2.21739	64	45.4288	73.489	4
792	0.713043	21.3333	45.3718	30.138	2							792	2.21739	64	45.421	73.342	4
793	0.721739	21.3333	45.3805	30.061	2							793	2.86957	64	45.393	73.48	4
794	0.956522	21.3333	45.3418	30.205	2							794	5.03478	64	45.3157	74.177	4
795	1.2087	21.3333	45.2944	30.635	2							795	5.29565	64	45.2887	74.371	4
796	1.2087	21.3333	45.2855	30.719	2							796	6.49565	64	45.2372	74.76	4
797	1.38261	21.3333	45.2576	30.747	2							797	7.90435	64	45.1619	75.194	4
798	1.6	21.3333	45.2319	30.92	2							798	9.05217	64	45.1112	75.488	4
799	1.67826	21.3333	45.2268	30.727	2							799	11.8435	64	44.9675	76.617	4
800	1.76522	21.3333	45.2159	30.849	2							800	12.6435	64	44.9358	76.582	4
801	2.10435	21.3333	45.167	31.254	2							801	14.4522	64	44.8611	77.069	4
802	2.10435	21.3333	45.1549	31.418	2							802	19.2522	64	44.6341	78.259	4
803	2.10435	21.3333	45.1576	31.252	2							803	21.5478	64	44.5157	78.838	4
804	2.63478	21.3333	45.0756	31.699	2							804	23.2174	64	44.4475	79.313	4
805	2.73913	21.3333	45.0669	31.857	2							805	26.8696	64	44.2748	80.086	4
806	2.94783	21.3333	45.028	32.209	2							806	26.8696	64	44.2747	80.071	4
807	3.01739	21.3333	45.0159	32.219	2							807	2.21739	74.6667	45.4481	73.044	4
808	3.4087	21.3333	44.9421	32.534	2							808	2.21739	74.6667	45.4444	73.07	4
809	3.48696	21.3333	44.9133	32.806	2							809	2.21739	74.6667	45.4414	73.311	4
810	3.51304	21.3333	44.8981	32.652	2							810	2.86957	74.6667	45.4351	73.283	4
811	3.51304	21.3333	44.8955	32.705	2							811	5.03478	74.6667	45.391	73.548	4
812	3.81739	21.3333	44.8472	33.096	2							812	5.29565	74.6667	45.3716	73.581	4
813	3.82609	21.3333	44.8424	33.065	2							813	6.49565	74.6667	45.3581	73.87	4
814	3.82609	21.3333	44.8464	33.171	2							814	7.90435	74.6667	45.3375	73.945	4
815	3.98261	21.3333	44.8131	33.382	2							815	9.05217	74.6667	45.3271	74.043	4
816	4.03478	21.3333	44.8162	33.325	2							816	11.8435	74.6667	45.2808	74.377	4
817	4.46087	21.3333	44.7514	33.688	2							817	12.6435	74.6667	45.2696	74.397	4
818	4.46087	21.3333	44.765	33.39	2							818	14.4522	74.6667	45.2466	74.429	4
819	4.48696	21.3333	44.7451	33.715	2							819	19.2522	74.6667	45.1979	74.855	4
820	4.96522	21.3333	44.6666	34.052	2							820	21.5478	74.6667	45.1623	74.762	4
821	6.53043	21.3333	44.4089	35.584	2							821	23.2174	74.6667	45.1353	75.009	4
822	6.66957	21.3333	44.3915	35.506	2							822	26.8696	74.6667	45.0892	75.088	4
823	6.66957	21.3333	44.3857	35.587	2							823	26.8696	74.6667	45.0807	75.046	4
824	6.86087	21.3333	44.3648	35.675	2							824	2.21739	85.3333	45.5261	72.572	4
825	7.73913	21.3333	44.2056	36.546	2							825	2.21739	85.3333	45.5215	72.488	4
826	7.73913	21.3333	44.2043	36.439	2							826	2.21739	85.3333	45.5241	72.451	4
827	8.95652	21.3333	44.0037	37.323	2							827	2.86957	85.3333	45.5271	72.361	4
828	9.1913	21.3333	43.9666	37.756	2							828	5.03478	85.3333	45.5593	72.097	4
829	9.73043	21.3333	43.8849	37.915	2							829	5.29565	85.3333	45.5621	72.146	4
830	9.73043	21.3333	43.8584	38.029	2							830	6.49565	85.3333	45.5863	72.039	4
831	16.3739	21.3333	42.7481	42.583	2							831	7.90435	85.3333	45.6181	71.893	4
832	22.0435	21.3333	41.8051	45.708	2							832	9.05217	85.3333	45.6387	71.692	4
833	0.504348	32	45.4713	29.626	2							833	11.8435	85.3333	45.6789	71.426	4
834	0.591304	32	45.4564	29.577	2							834	12.6435	85.3333	45.6986	71.264	4
835	0.713043	32	45.4317	29.667	2							835	14.4522	85.3333	45.7241	71.187	4
836	0.721739	32	45.436	29.816	2							836	19.2522	85.3333	45.7912	71	4
837	0.956522	32	45.4141	29.897	2							837	21.5478	85.3333	45.8475	70.721	4
838	1.2087	32	45.3838	29.995	2							838	23.2174	85.3333	45.8703	70.609	4
839	1.2087	32	45.3883	29.895	2							839	26.8696	85.3333	45.9126	70.307	4
840	1.38261	32	45.3602	30.223	2							840	26.8696	85.3333	45.8972	70.428	4
841	1.6	32	45.3249	30.415	2							841	2.21739	96	45.6134	71.947	4
842	1.67826	32	45.298	30.757	2							842	2.21739	96	45.6219	71.885	4
843	1.76522	32	45.2911	30.772	2							843	2.21739	96	45.6209	71.965	4
844	2.10435	32	45.2507	30.899	2							844	2.86957	96	45.6511	71.815	4
845	2.10435	32	45.2492	30.736	2							845	5.03478	96	45.7487	71.026	4
846	2.10435	32	45.2462	30.803	2							846	5.29565	96	45.7511	70.98	4
847	2.63478	32	45.1708	31.279	2							847	6.49565	96	45.7912	70.872	4
848	2.73913	32	45.1636	31.297	2							848	7.90435	96	45.852	70.515	4
849	2.94783	32	45.1413	31.361	2							849	9.05217	96	45.9024	70.06	4
850	3.01739	32	45.1174	31.538	2							850	11.8435	96	46.0182	69.329	4
851	3.4087	32	45.0635	32.007	2							851	12.6435	96	46.062	68.907	4
852	3.48696	32	45.0559	32.135	2							852	14.4522	96	46.1501	68.345	4
853	3.51304	32	45.0427	32.216	2							853	19.2522	96	46.3791	67.025	4
854	3.51304	32	45.0395	32.18	2							854	21.5478	96	46.4928	66.661	4
855	3.81739	32	45.0062	32.419	2							855	23.2174	96	46.5859	66.191	4
856	3.82609	32	45.0032	32.441	2							856	26.8696	96	46.7396	65.633	4
857	3.82609	32	44.9934	32.442	2							857	26.8696	96	46.7431	65.715	4
858	3.98261	32	44.9761	32.485	2							858	2.21739	106.667	45.7126	71.129	4
859	4.03478	32	44.9698	32.419	2							859	2.21739	106.667	45.7012	71.269	4
860	4.46087	32	44.9069	32.786	2							860	2.21739	106.667	45.6952	71.523	4
861	4.46087	32	44.9271	32.584	2							861	2.86957	106.667	45.739	70.904	4
862	4.48696	32	44.914	32.554	2							862	5.03478	106.667	45.8942	69.99	4
863	4.96522	32	44.8465	33.081	2							863	5.29565	106.667	45.9152	69.727	4
864	6.53043	32	44.636	34.008	2							864	6.49565	106.667	45.9926	69.103	4
865	6.66957	32	44.6065	34.373	2							865	7.90435	106.667	46.1021	68.556	4
866	6.66957	32	44.5903	34.385	2							866	9.05217	106.667	46.1901	67.922	4
867	6.86087	32	44.5884	34.447	2							867	11.8435	106.667	46.3933	66.902	4
868	7.73913	32	44.4724	34.812	2							868	12.6435	106.667	46.4671	66.212	4
869	7.73913	32	44.4684	35.041	2							869	14.4522	106.667	46.6147	65.631	4
870	8.95652	32	44.3051	35.687	2							870	19.2522	106.667	46.9872	63.279	4
871	9.1913	32	44.2739	35.808	2							871	21.5478	106.667	47.1754	62.401	4
872	9.73043	32	44.2194	36.009	2							872	23.2174	106.667	47.2959	62.25	4
873	9.73043	32	44.2005	36.285	2							873	26.8696	106.667	47.5649	61.014	4
874	16.3739	32	43.3038	39.753	2							874	26.8696	106.667	47.5721	60.949	4
875	22.0435	32	42.5367	42.269	2							875	2.21739	117.333	45.7272	71.129	4
876	0.504348	42.6667	45.4701	29.474	2							876	2.21739	117.333	45.7104	71.255	4
877	0.591304	42.6667	45.4518	29.768	2							877	2.21739	117.333	45.7274	70.959	4
878	0.713043	42.6667	45.4344	29.75	2							878	2.86957	117.333	45.8059	70.354	4
879	0.721739	42.6667	45.4189	29.894	2							879	5.03478	117.333	46.045	68.845	4
880	0.956522	42.6667	45.4025	30.026	2							880	5.29565	117.333	46.0817	68.766	4
881	1.2087	42.6667	45.372	30.171	2							881	6.49565	117.333	46.2004	67.776	4
882	1.2087	42.6667	45.3713	30.184	2							882	7.90435	117.333	46.3612	66.5	4
883	1.38261	42.6667	45.3616	30.25	2							883	9.05217	117.333	46.4834	65.56	4
884	1.6	42.6667	45.3407	30.4	2							884	11.8435	117.333	46.775	63.756	4
885	1.67826	42.6667	45.3343	30.544	2							885	12.6435	117.333	46.866	63.388	4
886	1.76522	42.6667	45.3317	30.32	2							886	14.4522	117.333	47.0429	62.444	4
887	2.10435	42.6667	45.2964	30.635	2							887	19.2522	117.333	47.5352	60.005	4
888	2.10435	42.6667	45.293	30.58	2							888	21.5478	117.333	47.7815	59.079	4
889	2.10435	42.6667	45.2934	30.603	2							889	23.2174	117.333	47.9522	58.236	4
890	2.63478	42.6667	45.2274	30.999	2							890	26.8696	117.333	48.3337	56.79	4
891	2.73913	42.6667	45.2167	31.021	2							891	26.8696	117.333	48.3369	56.674	4
892	2.94783	42.6667	45.185	31.097	2							892	2.21739	128	45.8197	70.265	4
893	3.01739	42.6667	45.1809	31.136	2							893	2.21739	128	45.8064	70.447	4
894	3.4087	42.6667	45.1455	31.336	2							894	2.21739	128	45.8266	70.472	4
895	3.48696	42.6667	45.122	31.49	2							895	2.86957	128	45.9147	69.936	4
896	3.51304	42.6667	45.1136	31.591	2							896	5.03478	128	46.1997	68.018	4
897	3.51304	42.6667	45.1059	31.531	2							897	5.29565	128	46.2365	67.921	4
898	3.81739	42.6667	45.0847	31.603	2							898	6.49565	128	46.4153	66.805	4
899	3.82609	42.6667	45.0976	31.83	2							899	7.90435	128	46.5938	65.357	4
900	3.82609	42.6667	45.0931	31.925	2							900	9.05217	128	46.7682	64.187	4
901	3.98261	42.6667	45.0734	31.807	2							901	11.8435	128	47.151	61.801	4
902	4.03478	42.6667	45.0658	31.961	2							902	12.6435	128	47.2628	61.014	4
903	4.46087	42.6667	45.0245	31.952	2							903	14.4522	128	47.5068	59.911	4
904	4.46087	42.6667	45.0262	31.836	2							904	19.2522	128	48.1691	56.449	4
905	4.48696	42.6667	45.0135	31.913	2							905	21.5478	128	48.4949	54.822	4
906	4.96522	42.6667	44.9614	32.252	2							906	23.2174	128	48.7208	53.997	4
907	6.53043	42.6667	44.8132	33.122	2							907	26.8696	128	49.2074	52.082	4
908	6.66957	42.6667	44.8033	33.002	2							908	26.8696	128	49.2004	52.107	4
909	6.66957	42.6667	44.7956	33.092	2							909	2.21739	138.667	45.8734	70.006	4
910	6.86087	42.6667	44.7691	33.224	2							910	2.21739	138.667	45.8711	69.857	4
911	7.73913	42.6667	44.6953	33.635	2							911	2.21739	138.667	45.8686	69.983	4
912	7.73913	42.6667	44.6909	33.701	2							912	2.86957	138.667	45.9717	69.172	4
913	8.95652	42.6667	44.5588	34.256	2							913	5.03478	138.667	46.3247	67.062	4
914	9.1913	42.6667	44.5432	34.194	2							914	5.29565	138.667	46.3601	66.586	4
915	9.73043	42.6667	44.491	34.502	2							915	6.49565	138.667	46.5615	65.368	4
916	9.73043	42.6667	44.4889	34.519	2							916	7.90435	138.667	46.8061	63.852	4
917	16.3739	42.6667	43.7786	37.395	2							917	9.05217	138.667	47.0002	62.623	4
918	22.0435	42.6667	43.177	39.299	2							918	11.8435	138.667	47.4805	59.706	4
919	0.504348	53.3333	45.4855	29.536	2							919	12.6435	138.667	47.6318	58.67	4
920	0.591304	53.3333	45.4802	29.406	2							920	14.4522	138.667	47.9209	57.038	4
921	0.713043	53.3333	45.4586	29.6	2							921	19.2522	138.667	48.7359	53.107	4
922	0.721739	53.3333	45.4621	29.594	2							922	21.5478	138.667	49.1199	51.383	4
923	0.956522	53.3333	45.4321	29.616	2							923	23.2174	138.667	49.3879	50.112	4
924	1.2087	53.3333	45.4064	29.869	2							924	26.8696	138.667	49.9831	47.841	4
925	1.2087	53.3333	45.4245	29.78	2							925	26.8696	138.667	49.9801	48.006	4
926	1.38261	53.3333	45.4058	29.655	2							926	2.21739	149.333	45.9722	69.422	4
927	1.6	53.3333	45.3855	30.07	2							927	2.21739	149.333	45.9711	69.527	4
928	1.67826	53.3333	45.3689	30.076	2							928	2.21739	149.333	45.9612	69.471	4
929	1.76522	53.3333	45.3711	29.941	2							929	2.86957	149.333	46.0971	68.412	4
930	2.10435	53.3333	45.3447	30.146	2							930	5.03478	149.333	46.5372	65.542	4
931	2.10435	53.3333	45.3508	30.325	2							931	5.29565	149.333	46.5824	65.26	4
932	2.10435	53.3333	45.3529	30.301	2							932	6.49565	149.333	46.826	63.537	4
933	2.63478	53.3333	45.3135	30.533	2							933	7.90435	149.333	47.0871	61.639	4
934	2.73913	53.3333	45.3018	30.442	2							934	9.05217	149.333	47.3022	60.238	4
935	2.94783	53.3333	45.2886	30.438	2							935	11.8435	149.333	47.8572	56.76	4
936	3.01739	53.3333	45.2816	30.674	2							936	12.6435	149.333	48.0112	55.979	4
937	3.4087	53.3333	45.2503	30.779	2							937	14.4522	149.333	48.3826	54.035	4
938	3.48696	53.3333	45.2456	30.864	2							938	19.2522	149.333	49.3288	49.555	4
939	3.51304	53.3333	45.2517	30.781	2							939	21.5478	149.333	49.7782	47.601	4
940	3.51304	53.3333	45.2601	30.72	2							940	23.2174	149.333	50.102	46.459	4
941	3.81739	53.3333	45.2275	30.908	2							941	26.8696	149.333	50.8322	43.747	4
942	3.82609	53.3333	45.2283	30.78	2							942	26.8696	149.333	50.8398	43.759	4
943	3.82609	53.3333	45.2394	30.666	2							943	2.21739	160	46.0423	68.759	4
944	3.98261	53.3333	45.2254	30.76	2							944	2.21739	160	46.0216	68.854	4
945	4.03478	53.3333	45.2101	31.03	2							945	2.21739	160	46.0179	68.94	4
946	4.46087	53.3333	45.1784	31.056	2							946	2.86957	160	46.1627	67.923	4
947	4.46087	53.3333	45.1845	31.073	2							947	5.03478	160	46.6579	64.518	4
948	4.48696	53.3333	45.189	31.009	2							948	5.29565	160	46.7158	64.027	4
949	4.96522	53.3333	45.1448	31.182	2							949	6.49565	160	47.0026	62.034	4
950	6.53043	53.3333	45.0245	31.822	2							950	7.90435	160	47.3184	60.334	4
951	6.66957	53.3333	45.0016	32.07	2							951	9.05217	160	47.5812	58.427	4
952	6.66957	53.3333	45.0169	31.891	2							952	11.8435	160	48.2253	54.707	4
953	6.86087	53.3333	45.0071	31.907	2							953	12.6435	160	48.3871	53.801	4
954	7.73913	53.3333	44.9351	32.521	2							954	14.4522	160	48.7874	51.488	4
955	7.73913	53.3333	44.9205	32.332	2							955	19.2522	160	49.8809	46.233	4
956	8.95652	53.3333	44.8375	32.599	2							956	21.5478	160	50.4199	44.008	4
957	9.1913	53.3333	44.829	32.624	2							957	23.2174	160	50.8276	42.845	4
958	9.73043	53.3333	44.7854	32.847	2							958	26.8696	160	51.6642	39.91	4
959	9.73043	53.3333	44.7907	32.843	2							959	26.8696	160	51.6695	39.893	4
960	16.3739	53.3333	44.2704	34.911	2							960	0.808696	0	45.2754	97.066	5
961	22.0435	53.3333	43.8524	36.407	2							961	1.43478	0	45.1657	97.924	5
962	0.504348	64	45.4871	29.375	2							962	1.43478	0	45.1551	97.87	5
963	0.591304	64	45.4798	29.404	2							963	1.69565	0	45.1298	97.851	5
964	0.713043	64	45.4761	29.391	2							964	1.98261	0	45.0527	98.8	5
965	0.721739	64	45.4686	29.627	2							965	4.14783	0	44.5586	102.348	5
966	0.956522	64	45.4725	29.574	2							966	4.8	0	44.3795	103.654	5
967	1.2087	64	45.4579	29.632	2							967	7.87826	0	43.7123	108.647	5
968	1.2087	64	45.449	29.599	2							968	10.2261	0	43.1727	112.373	5
969	1.38261	64	45.4438	29.472	2							969	11.9478	0	42.7568	115.239	5
970	1.6	64	45.4479	29.536	2							970	17.5304	0	41.4924	123.736	5
971	1.67826	64	45.4381	29.492	2							971	17.9652	0	41.3973	124.478	5
972	1.76522	64	45.4241	29.601	2							972	19.5913	0	40.9996	126.859	5
973	2.10435	64	45.4103	29.884	2							973	19.5913	0	41.0188	126.744	5
974	2.10435	64	45.4113	29.914	2							974	23.087	0	40.2024	131.835	5
975	2.10435	64	45.4198	30.093	2							975	55.8783	0	32.768	166.944	5
976	2.63478	64	45.3927	30.076	2							976	0.808696	10.6667	45.3755	96.314	5
977	2.73913	64	45.3831	30.238	2							977	1.43478	10.6667	45.2256	97.377	5
978	2.94783	64	45.3866	30.18	2							978	1.43478	10.6667	45.2109	97.317	5
979	3.01739	64	45.3846	30.2	2							979	1.69565	10.6667	45.1777	97.776	5
980	3.4087	64	45.3534	30.157	2							980	1.98261	10.6667	45.1496	98.037	5
981	3.48696	64	45.3598	30.128	2							981	4.14783	10.6667	44.6751	101.489	5
982	3.51304	64	45.3632	30.018	2							982	4.8	10.6667	44.5633	102.501	5
983	3.51304	64	45.3499	30.273	2							983	7.87826	10.6667	43.9647	106.844	5
984	3.81739	64	45.3474	30.293	2							984	10.2261	10.6667	43.514	110.315	5
985	3.82609	64	45.3344	30.235	2							985	11.9478	10.6667	43.1758	112.675	5
986	3.82609	64	45.3443	30.251	2							986	17.5304	10.6667	42.0629	120.239	5
987	3.98261	64	45.3272	30.342	2							987	17.9652	10.6667	41.9859	120.715	5
988	4.03478	64	45.3178	30.334	2							988	19.5913	10.6667	41.6532	122.361	5
989	4.46087	64	45.3083	30.418	2							989	19.5913	10.6667	41.644	122.54	5
990	4.46087	64	45.3105	30.272	2							990	23.087	10.6667	40.9714	126.285	5
991	4.48696	64	45.3145	30.448	2							991	55.8783	10.6667	34.5022	157.003	5
992	4.96522	64	45.2868	30.463	2							992	0.808696	21.3333	45.3618	96.349	5
993	6.53043	64	45.2175	30.811	2							993	1.43478	21.3333	45.282	96.919	5
994	6.66957	64	45.2067	31.059	2							994	1.43478	21.3333	45.2716	97.016	5
995	6.66957	64	45.2084	30.878	2							995	1.69565	21.3333	45.2227	97.42	5
996	6.86087	64	45.1921	30.902	2							996	1.98261	21.3333	45.1653	97.509	5
997	7.73913	64	45.1748	30.998	2							997	4.14783	21.3333	44.7915	100.595	5
998	7.73913	64	45.1794	30.925	2							998	4.8	21.3333	44.7058	101.341	5
999	8.95652	64	45.1078	31.369	2							999	7.87826	21.3333	44.169	105.495	5
1000	9.1913	64	45.0972	31.323	2							1000	10.2261	21.3333	43.7953	108.133	5
1001	9.73043	64	45.0751	31.413	2							1001	11.9478	21.3333	43.4903	110.095	5
1002	9.73043	64	45.0752	31.244	2							1002	17.5304	21.3333	42.5335	116.56	5
1003	16.3739	64	44.7684	32.639	2							1003	17.9652	21.3333	42.4735	116.878	5
1004	22.0435	64	44.5192	33.386	2							1004	19.5913	21.3333	42.2058	118.415	5
1005	0.504348	74.6667	45.538	29.014	2							1005	19.5913	21.3333	42.2145	118.819	5
1006	0.591304	74.6667	45.5244	29.208	2							1006	23.087	21.3333	41.6432	121.801	5
1007	0.713043	74.6667	45.5204	29.303	2							1007	55.8783	21.3333	36.1968	147.158	5
1008	0.721739	74.6667	45.5202	29.237	2							1008	0.808696	32	45.382	96.227	5
1009	0.956522	74.6667	45.5174	29.281	2							1009	1.43478	32	45.2592	96.899	5
1010	1.2087	74.6667	45.5013	29.289	2							1010	1.43478	32	45.3003	97.001	5
1011	1.2087	74.6667	45.4989	29.213	2							1011	1.69565	32	45.2872	96.824	5
1012	1.38261	74.6667	45.502	29.354	2							1012	1.98261	32	45.2791	97.095	5
1013	1.6	74.6667	45.5006	29.256	2							1013	4.14783	32	44.9115	99.871	5
1014	1.67826	74.6667	45.5059	29.306	2							1014	4.8	32	44.8688	99.987	5
1015	1.76522	74.6667	45.4936	29.415	2							1015	7.87826	32	44.436	103.236	5
1016	2.10435	74.6667	45.4788	29.517	2							1016	10.2261	32	44.1397	105.502	5
1017	2.10435	74.6667	45.4883	29.343	2							1017	11.9478	32	43.88	107.282	5
1018	2.10435	74.6667	45.51	29.176	2							1018	17.5304	32	43.1474	112.045	5
1019	2.63478	74.6667	45.5014	29.027	2							1019	17.9652	32	43.0893	112.451	5
1020	2.73913	74.6667	45.4943	29.037	2							1020	19.5913	32	42.8001	114.22	5
1021	2.94783	74.6667	45.4915	29.156	2							1021	19.5913	32	42.8351	114.139	5
1022	3.01739	74.6667	45.4956	29.217	2							1022	23.087	32	42.3146	117.299	5
1023	3.4087	74.6667	45.4976	29.105	2							1023	55.8783	32	37.8514	137.55	5
1024	3.48696	74.6667	45.4899	29.266	2							1024	0.808696	42.6667	45.4091	95.914	5
1025	3.51304	74.6667	45.4953	29.215	2							1025	1.43478	42.6667	45.3387	96.351	5
1026	3.51304	74.6667	45.5085	29.257	2							1026	1.43478	42.6667	45.3258	96.31	5
1027	3.81739	74.6667	45.5088	29.192	2							1027	1.69565	42.6667	45.3053	96.534	5
1028	3.82609	74.6667	45.499	29.343	2							1028	1.98261	42.6667	45.2853	96.931	5
1029	3.82609	74.6667	45.4933	29.603	2							1029	4.14783	42.6667	45.0809	98.538	5
1030	3.98261	74.6667	45.4844	29.364	2							1030	4.8	42.6667	44.9821	99.038	5
1031	4.03478	74.6667	45.4767	29.434	2							1031	7.87826	42.6667	44.6693	101.633	5
1032	4.46087	74.6667	45.476	29.303	2							1032	10.2261	42.6667	44.4335	103.388	5
1033	4.46087	74.6667	45.4757	29.393	2							1033	11.9478	42.6667	44.2316	104.673	5
1034	4.48696	74.6667	45.4709	29.372	2							1034	17.5304	42.6667	43.6374	108.397	5
1035	4.96522	74.6667	45.4526	29.46	2							1035	17.9652	42.6667	43.591	109.052	5
1036	6.53043	74.6667	45.4241	29.722	2							1036	19.5913	42.6667	43.446	109.673	5
1037	6.66957	74.6667	45.4209	29.603	2							1037	19.5913	42.6667	43.4054	109.922	5
1038	6.66957	74.6667	45.4274	29.629	2							1038	23.087	42.6667	43.0365	111.931	5
1039	6.86087	74.6667	45.4059	29.669	2							1039	55.8783	42.6667	39.5625	127.935	5
1040	7.73913	74.6667	45.4055	29.71	2							1040	0.808696	53.3333	45.4127	95.842	5
1041	7.73913	74.6667	45.4176	29.549	2							1041	1.43478	53.3333	45.389	95.911	5
1042	8.95652	74.6667	45.3973	29.811	2							1042	1.43478	53.3333	45.3882	95.9	5
1043	9.1913	74.6667	45.3822	29.724	2							1043	1.69565	53.3333	45.3442	96.064	5
1044	9.73043	74.6667	45.3693	29.989	2							1044	1.98261	53.3333	45.3616	96.302	5
1045	9.73043	74.6667	45.3842	29.708	2							1045	4.14783	53.3333	45.2086	97.309	5
1046	16.3739	74.6667	45.2959	30.187	2							1046	4.8	53.3333	45.1506	97.846	5
1047	22.0435	74.6667	45.212	30.358	2							1047	7.87826	53.3333	44.8856	99.571	5
1048	0.504348	85.3333	45.5104	29.485	2							1048	10.2261	53.3333	44.7254	100.737	5
1049	0.591304	85.3333	45.5079	29.415	2							1049	11.9478	53.3333	44.6279	101.882	5
1050	0.713043	85.3333	45.5131	29.156	2							1050	17.5304	53.3333	44.1765	104.37	5
1051	0.721739	85.3333	45.5058	29.307	2							1051	17.9652	53.3333	44.1648	104.769	5
1052	0.956522	85.3333	45.5243	29.524	2							1052	19.5913	53.3333	44.0158	105.486	5
1053	1.2087	85.3333	45.5333	29.426	2							1053	19.5913	53.3333	43.9952	105.771	5
1054	1.2087	85.3333	45.5207	29.201	2							1054	23.087	53.3333	43.7209	107.122	5
1055	1.38261	85.3333	45.5235	29.296	2							1055	55.8783	53.3333	41.2435	118.163	5
1056	1.6	85.3333	45.5264	29.375	2							1056	0.808696	64	45.4552	95.621	5
1057	1.67826	85.3333	45.5124	29.326	2							1057	1.43478	64	45.4042	95.859	5
1058	1.76522	85.3333	45.5331	29.22	2							1058	1.43478	64	45.4183	95.697	5
1059	2.10435	85.3333	45.5427	29.192	2							1059	1.69565	64	45.419	95.882	5
1060	2.10435	85.3333	45.5458	29.034	2							1060	1.98261	64	45.4058	96.049	5
1061	2.10435	85.3333	45.5373	29.228	2							1061	4.14783	64	45.2635	97.2	5
1062	2.63478	85.3333	45.5461	29.123	2							1062	4.8	64	45.2211	97.09	5
1063	2.73913	85.3333	45.5276	29.29	2							1063	7.87826	64	45.112	98.169	5
1064	2.94783	85.3333	45.5472	29.213	2							1064	10.2261	64	44.9851	98.905	5
1065	3.01739	85.3333	45.5592	29.144	2							1065	11.9478	64	44.9134	99.436	5
1066	3.4087	85.3333	45.5583	29.03	2							1066	17.5304	64	44.6408	101.047	5
1067	3.48696	85.3333	45.5593	28.946	2							1067	17.9652	64	44.63	101.018	5
1068	3.51304	85.3333	45.5519	28.944	2							1068	19.5913	64	44.5996	101.504	5
1069	3.51304	85.3333	45.5436	28.961	2							1069	19.5913	64	44.5607	101.645	5
1070	3.81739	85.3333	45.5467	29.085	2							1070	23.087	64	44.4343	102.257	5
1071	3.82609	85.3333	45.5532	29.025	2							1071	55.8783	64	42.9308	108.766	5
1072	3.82609	85.3333	45.555	29.004	2							1072	0.808696	74.6667	45.4532	95.564	5
1073	3.98261	85.3333	45.5473	29.108	2							1073	1.43478	74.6667	45.4512	95.451	5
1074	4.03478	85.3333	45.5455	29.225	2							1074	1.43478	74.6667	45.4105	95.675	5
1075	4.46087	85.3333	45.5656	28.944	2							1075	1.69565	74.6667	45.4514	95.52	5
1076	4.46087	85.3333	45.5787	28.795	2							1076	1.98261	74.6667	45.4737	95.309	5
1077	4.48696	85.3333	45.5786	28.99	2							1077	4.14783	74.6667	45.4219	95.903	5
1078	4.96522	85.3333	45.5792	28.965	2							1078	4.8	74.6667	45.4118	95.929	5
1079	6.53043	85.3333	45.5981	28.751	2							1079	7.87826	74.6667	45.3897	96.14	5
1080	6.66957	85.3333	45.5932	28.969	2							1080	10.2261	74.6667	45.331	96.33	5
1081	6.66957	85.3333	45.5941	28.742	2							1081	11.9478	74.6667	45.2924	96.766	5
1082	6.86087	85.3333	45.5975	28.874	2							1082	17.5304	74.6667	45.2077	97.545	5
1083	7.73913	85.3333	45.616	28.726	2							1083	17.9652	74.6667	45.1889	97.386	5
1084	7.73913	85.3333	45.6062	28.904	2							1084	19.5913	74.6667	45.2107	97.292	5
1085	8.95652	85.3333	45.6213	28.644	2							1085	19.5913	74.6667	45.1897	97.423	5
1086	9.1913	85.3333	45.6458	28.652	2							1086	23.087	74.6667	45.0998	98.065	5
1087	9.73043	85.3333	45.6586	28.574	2							1087	55.8783	74.6667	44.5909	100.23	5
1088	9.73043	85.3333	45.6572	28.518	2							1088	0.808696	85.3333	45.541	94.967	5
1089	16.3739	85.3333	45.7591	28.294	2							1089	1.43478	85.3333	45.5476	95.166	5
1090	22.0435	85.3333	45.8513	28.023	2							1090	1.43478	85.3333	45.5446	94.792	5
1091	0.504348	96	45.5629	28.959	2							1091	1.69565	85.3333	45.555	94.574	5
1092	0.591304	96	45.5713	28.965	2							1092	1.98261	85.3333	45.547	94.718	5
1093	0.713043	96	45.5728	28.934	2							1093	4.14783	85.3333	45.6005	94.49	5
1094	0.721739	96	45.5776	28.832	2							1094	4.8	85.3333	45.5838	94.504	5
1095	0.956522	96	45.5782	28.899	2							1095	7.87826	85.3333	45.6362	94.332	5
1096	1.2087	96	45.5753	28.874	2							1096	10.2261	85.3333	45.671	93.829	5
1097	1.2087	96	45.5789	28.866	2							1097	11.9478	85.3333	45.6992	93.604	5
1098	1.38261	96	45.5966	28.781	2							1098	17.5304	85.3333	45.8162	92.918	5
1099	1.6	96	45.6029	28.747	2							1099	17.9652	85.3333	45.7938	93.196	5
1100	1.67826	96	45.5988	28.889	2							1100	19.5913	85.3333	45.8476	92.864	5
1101	1.76522	96	45.6046	28.823	2							1101	19.5913	85.3333	45.8154	93.221	5
1102	2.10435	96	45.6192	28.72	2							1102	23.087	85.3333	45.8886	92.79	5
1103	2.10435	96	45.6112	28.892	2							1103	55.8783	85.3333	46.3782	90.778	5
1104	2.10435	96	45.6111	28.845	2							1104	0.808696	96	45.5602	94.903	5
1105	2.63478	96	45.6316	28.642	2							1105	1.43478	96	45.5586	94.958	5
1106	2.73913	96	45.6411	28.541	2							1106	1.43478	96	45.6101	94.325	5
1107	2.94783	96	45.6513	28.463	2							1107	1.69565	96	45.5944	94.335	5
1108	3.01739	96	45.6666	28.339	2							1108	1.98261	96	45.6169	94.468	5
1109	3.4087	96	45.6851	28.333	2							1109	4.14783	96	45.7035	93.687	5
1110	3.48696	96	45.6811	28.342	2							1110	4.8	96	45.7529	93.473	5
1111	3.51304	96	45.6868	28.228	2							1111	7.87826	96	45.9213	92.295	5
1112	3.51304	96	45.6891	28.289	2							1112	10.2261	96	46.0024	91.433	5
1113	3.81739	96	45.7026	28.361	2							1113	11.9478	96	46.1026	91.025	5
1114	3.82609	96	45.7062	28.366	2							1114	17.5304	96	46.3664	89.412	5
1115	3.82609	96	45.7006	28.396	2							1115	17.9652	96	46.406	88.924	5
1116	3.98261	96	45.7228	28.283	2							1116	19.5913	96	46.4281	88.785	5
1117	4.03478	96	45.7139	28.303	2							1117	19.5913	96	46.4621	88.859	5
1118	4.46087	96	45.7208	28.156	2							1118	23.087	96	46.5717	88.366	5
1119	4.46087	96	45.7191	28.275	2							1119	55.8783	96	48.0681	81.811	5
1120	4.48696	96	45.7161	28.158	2							1120	0.808696	106.667	45.566	95.022	5
1121	4.96522	96	45.7445	28.003	2							1121	1.43478	106.667	45.5818	94.363	5
1122	6.53043	96	45.8166	27.783	2							1122	1.43478	106.667	45.622	94.551	5
1123	6.66957	96	45.8219	27.74	2							1123	1.69565	106.667	45.6408	94.241	5
1124	6.66957	96	45.825	27.644	2							1124	1.98261	106.667	45.6149	94.323	5
1125	6.86087	96	45.8396	27.656	2							1125	4.14783	106.667	45.8249	92.679	5
1126	7.73913	96	45.8826	27.254	2							1126	4.8	106.667	45.8958	92.372	5
1127	7.73913	96	45.8844	27.213	2							1127	7.87826	106.667	46.1454	90.563	5
1128	8.95652	96	45.9296	27.045	2							1128	10.2261	106.667	46.2841	89.915	5
1129	9.1913	96	45.9381	26.942	2							1129	11.9478	106.667	46.3875	88.83	5
1130	9.73043	96	45.9723	26.91	2							1130	17.5304	106.667	46.829	86.215	5
1131	9.73043	96	45.9841	26.863	2							1131	17.9652	106.667	46.8613	86.018	5
1132	16.3739	96	46.2809	25.993	2							1132	19.5913	106.667	46.9722	85.42	5
1133	22.0435	96	46.5387	25.236	2							1133	19.5913	106.667	46.969	85.336	5
1134	0.504348	106.667	45.5388	29.331	2							1134	23.087	106.667	47.1987	84.032	5
1135	0.591304	106.667	45.552	29.079	2							1135	55.8783	106.667	49.6936	74.093	5
1136	0.713043	106.667	45.5744	28.975	2							1136	0.808696	117.333	45.6065	94.303	5
1137	0.721739	106.667	45.5782	28.953	2							1137	1.43478	117.333	45.6725	93.78	5
1138	0.956522	106.667	45.582	28.827	2							1138	1.43478	117.333	45.6598	93.943	5
1139	1.2087	106.667	45.6024	28.792	2							1139	1.69565	117.333	45.7149	93.508	5
1140	1.2087	106.667	45.6204	28.592	2							1140	1.98261	117.333	45.7396	93.46	5
1141	1.38261	106.667	45.6298	28.61	2							1141	4.14783	117.333	46.0138	91.278	5
1142	1.6	106.667	45.64	28.367	2							1142	4.8	117.333	46.0687	90.772	5
1143	1.67826	106.667	45.6536	28.394	2							1143	7.87826	117.333	46.402	88.487	5
1144	1.76522	106.667	45.6572	28.559	2							1144	10.2261	117.333	46.6185	87.078	5
1145	2.10435	106.667	45.6745	28.433	2							1145	11.9478	117.333	46.8124	85.764	5
1146	2.10435	106.667	45.6775	28.353	2							1146	17.5304	117.333	47.4127	82.045	5
1147	2.10435	106.667	45.6887	28.386	2							1147	17.9652	117.333	47.4068	82.004	5
1148	2.63478	106.667	45.7135	27.935	2							1148	19.5913	117.333	47.5961	80.763	5
1149	2.73913	106.667	45.727	27.993	2							1149	19.5913	117.333	47.6031	80.903	5
1150	2.94783	106.667	45.7417	27.949	2							1150	23.087	117.333	47.9771	78.731	5
1151	3.01739	106.667	45.7374	27.988	2							1151	55.8783	117.333	51.4792	65.644	5
1152	3.4087	106.667	45.7601	27.909	2							1152	0.808696	128	45.6595	94.132	5
1153	3.48696	106.667	45.781	27.722	2							1153	1.43478	128	45.7307	93.762	5
1154	3.51304	106.667	45.7767	27.709	2							1154	1.43478	128	45.7316	93.595	5
1155	3.51304	106.667	45.7692	27.869	2							1155	1.69565	128	45.7576	93.4	5
1156	3.81739	106.667	45.7993	27.607	2							1156	1.98261	128	45.8121	93.187	5
1157	3.82609	106.667	45.8133	27.52	2							1157	4.14783	128	46.112	90.887	5
1158	3.82609	106.667	45.803	27.526	2							1158	4.8	128	46.1921	90.361	5
1159	3.98261	106.667	45.8201	27.577	2							1159	7.87826	128	46.5946	87.236	5
1160	4.03478	106.667	45.8169	27.685	2							1160	10.2261	128	46.9053	84.923	5
1161	4.46087	106.667	45.8604	27.426	2							1161	11.9478	128	47.1555	83.478	5
1162	4.46087	106.667	45.8603	27.319	2							1162	17.5304	128	47.9455	78.757	5
1163	4.48696	106.667	45.8598	27.342	2							1163	17.9652	128	47.9596	78.525	5
1164	4.96522	106.667	45.8948	27.151	2							1164	19.5913	128	48.2219	77.206	5
1165	6.53043	106.667	46.0215	26.946	2							1165	19.5913	128	48.2353	76.964	5
1166	6.66957	106.667	46.0334	26.907	2							1166	23.087	128	48.697	74.745	5
1167	6.66957	106.667	46.0287	26.801	2							1167	55.8783	128	53.2018	58.169	5
1168	6.86087	106.667	46.0572	26.704	2							1168	0.808696	138.667	45.6127	94.19	5
1169	7.73913	106.667	46.1165	26.446	2							1169	1.43478	138.667	45.7273	93.513	5
1170	7.73913	106.667	46.1108	26.42	2							1170	1.43478	138.667	45.7537	93.264	5
1171	8.95652	106.667	46.199	26.045	2							1171	1.69565	138.667	45.7522	92.845	5
1172	9.1913	106.667	46.2058	26.022	2							1172	1.98261	138.667	45.8592	92.295	5
1173	9.73043	106.667	46.243	26.022	2							1173	4.14783	138.667	46.2411	89.596	5
1174	9.73043	106.667	46.2467	25.9	2							1174	4.8	138.667	46.3417	88.746	5
1175	16.3739	106.667	46.7453	24.332	2							1175	7.87826	138.667	46.8445	85.167	5
1176	22.0435	106.667	47.1811	22.996	2							1176	10.2261	138.667	47.2464	82.246	5
1177	0.504348	117.333	45.5689	29.161	2							1177	11.9478	138.667	47.5314	80.758	5
1178	0.591304	117.333	45.5622	29.306	2							1178	17.5304	138.667	48.4782	74.967	5
1179	0.713043	117.333	45.5888	28.969	2							1179	17.9652	138.667	48.5526	74.695	5
1180	0.721739	117.333	45.5979	28.874	2							1180	19.5913	138.667	48.8093	73.052	5
1181	0.956522	117.333	45.6299	28.762	2							1181	19.5913	138.667	48.7946	73.238	5
1182	1.2087	117.333	45.6522	28.518	2							1182	23.087	138.667	49.3819	70.183	5
1183	1.2087	117.333	45.641	28.452	2							1183	55.8783	138.667	54.86	51.079	5
1184	1.38261	117.333	45.6528	28.583	2							1184	0.808696	149.333	45.7062	93.624	5
1185	1.6	117.333	45.6598	28.592	2							1185	1.43478	149.333	45.8178	92.956	5
1186	1.67826	117.333	45.6699	28.434	2							1186	1.43478	149.333	45.8302	92.615	5
1187	1.76522	117.333	45.6936	28.252	2							1187	1.69565	149.333	45.8683	92.478	5
1188	2.10435	117.333	45.7348	27.913	2							1188	1.98261	149.333	45.9324	92.047	5
1189	2.10435	117.333	45.7303	28.038	2							1189	4.14783	149.333	46.3659	88.946	5
1190	2.10435	117.333	45.7452	27.873	2							1190	4.8	149.333	46.5061	87.686	5
1191	2.63478	117.333	45.8026	27.405	2							1191	7.87826	149.333	47.0758	83.382	5
1192	2.73913	117.333	45.7946	27.46	2							1192	10.2261	149.333	47.558	80.077	5
1193	2.94783	117.333	45.8109	27.333	2							1193	11.9478	149.333	47.9229	77.946	5
1194	3.01739	117.333	45.8184	27.465	2							1194	17.5304	149.333	49.0125	71.244	5
1195	3.4087	117.333	45.869	27.386	2							1195	17.9652	149.333	49.0861	70.799	5
1196	3.48696	117.333	45.8866	27.357	2							1196	19.5913	149.333	49.4021	68.953	5
1197	3.51304	117.333	45.8848	27.295	2							1197	19.5913	149.333	49.3908	69.213	5
1198	3.51304	117.333	45.8779	27.184	2							1198	23.087	149.333	50.0821	65.856	5
1199	3.81739	117.333	45.924	26.968	2							1199	55.8783	149.333	56.5763	44.233	5
1200	3.82609	117.333	45.9051	27.046	2							1200	0.808696	160	45.6801	93.985	5
1201	3.82609	117.333	45.9112	27.056	2							1201	1.43478	160	45.8205	92.867	5
1202	3.98261	117.333	45.9486	26.876	2							1202	1.43478	160	45.8545	92.439	5
1203	4.03478	117.333	45.9511	26.942	2							1203	1.69565	160	45.8772	92.319	5
1204	4.46087	117.333	45.9858	26.632	2							1204	1.98261	160	45.9866	91.472	5
1205	4.46087	117.333	45.9746	26.624	2							1205	4.14783	160	46.4712	88.117	5
1206	4.48696	117.333	45.9911	26.646	2							1206	4.8	160	46.5979	86.793	5
1207	4.96522	117.333	46.0375	26.475	2							1207	7.87826	160	47.3196	82.003	5
1208	6.53043	117.333	46.2098	25.505	2							1208	10.2261	160	47.8236	78.463	5
1209	6.66957	117.333	46.2212	25.466	2							1209	11.9478	160	48.2467	75.644	5
1210	6.66957	117.333	46.2193	25.679	2							1210	17.5304	160	49.4911	68.153	5
1211	6.86087	117.333	46.2473	25.532	2							1211	17.9652	160	49.5989	67.73	5
1212	7.73913	117.333	46.3522	25.001	2							1212	19.5913	160	49.9364	65.911	5
1213	7.73913	117.333	46.3406	25.066	2							1213	19.5913	160	49.9268	65.753	5
1214	8.95652	117.333	46.4687	24.555	2							1214	23.087	160	50.7512	62.125	5
1215	9.1913	117.333	46.5028	24.352	2							1215	55.8783	160	58.2276	37.876	5
1216	9.73043	117.333	46.558	24.176	2							1216	1.69565	0	45.1039	77.142	6
1217	9.73043	117.333	46.5532	24.205	2							1217	1.77391	0	45.0834	77.241	6
1218	16.3739	117.333	47.2512	21.774	2							1218	2.13913	0	44.9909	77.72	6
1219	22.0435	117.333	47.8606	20.411	2							1219	2.45217	0	44.9239	78.29	6
1220	0.504348	128	45.5862	28.733	2							1220	4.14783	0	44.545	81.18	6
1221	0.591304	128	45.5989	28.752	2							1221	4.24348	0	44.5165	81.289	6
1222	0.713043	128	45.6045	28.824	2							1222	6.02609	0	44.1199	84.035	6
1223	0.721739	128	45.6073	28.738	2							1223	7.87826	0	43.7118	86.914	6
1224	0.956522	128	45.6353	28.57	2							1224	10.5391	0	43.1127	91.115	6
1225	1.2087	128	45.6775	28.336	2							1225	11.8435	0	42.8179	92.817	6
1226	1.2087	128	45.6743	28.24	2							1226	13.0435	0	42.5285	94.813	6
1227	1.38261	128	45.7094	28.212	2							1227	16.5652	0	41.7192	99.511	6
1228	1.6	128	45.7477	27.98	2							1228	19.5913	0	41.0499	103.34	6
1229	1.67826	128	45.7471	27.995	2							1229	21.3652	0	40.6521	105.448	6
1230	1.76522	128	45.763	27.931	2							1230	21.5478	0	40.5999	105.794	6
1231	2.10435	128	45.8264	27.531	2							1231	27.5739	0	39.2158	112.762	6
1232	2.10435	128	45.8185	27.593	2							1232	27.5739	0	39.2158	112.82	6
1233	2.10435	128	45.8054	27.674	2							1233	1.69565	10.6667	45.2105	76.262	6
1234	2.63478	128	45.8811	27.044	2							1234	1.77391	10.6667	45.1912	76.508	6
1235	2.73913	128	45.9015	27.029	2							1235	2.13913	10.6667	45.1184	77.118	6
1236	2.94783	128	45.9097	26.875	2							1236	2.45217	10.6667	45.0573	77.42	6
1237	3.01739	128	45.9066	27.054	2							1237	4.14783	10.6667	44.7249	79.925	6
1238	3.4087	128	45.9731	26.657	2							1238	4.24348	10.6667	44.6977	80.066	6
1239	3.48696	128	46.0011	26.551	2							1239	6.02609	10.6667	44.344	82.507	6
1240	3.51304	128	45.9963	26.676	2							1240	7.87826	10.6667	43.9909	85.104	6
1241	3.51304	128	45.9769	26.766	2							1241	10.5391	10.6667	43.4349	88.731	6
1242	3.81739	128	46.0232	26.474	2							1242	11.8435	10.6667	43.1691	90.218	6
1243	3.82609	128	46.0244	26.496	2							1243	13.0435	10.6667	42.9401	91.791	6
1244	3.82609	128	46.0248	26.484	2							1244	16.5652	10.6667	42.24	95.83	6
1245	3.98261	128	46.0544	26.34	2							1245	19.5913	10.6667	41.6466	99.444	6
1246	4.03478	128	46.0592	26.267	2							1246	21.3652	10.6667	41.3004	100.994	6
1247	4.46087	128	46.1024	26.08	2							1247	21.5478	10.6667	41.2816	101.115	6
1248	4.46087	128	46.0955	26.08	2							1248	27.5739	10.6667	40.1002	106.904	6
1249	4.48696	128	46.1013	25.916	2							1249	27.5739	10.6667	40.1067	106.874	6
1250	4.96522	128	46.1838	25.667	2							1250	1.69565	21.3333	45.2532	76.025	6
1251	6.53043	128	46.4041	24.441	2							1251	1.77391	21.3333	45.2238	76.218	6
1252	6.66957	128	46.4297	24.49	2							1252	2.13913	21.3333	45.1685	76.677	6
1253	6.66957	128	46.409	24.654	2							1253	2.45217	21.3333	45.129	76.759	6
1254	6.86087	128	46.4469	24.31	2							1254	4.14783	21.3333	44.8417	79.01	6
1255	7.73913	128	46.5732	23.748	2							1255	4.24348	21.3333	44.8209	79.094	6
1256	7.73913	128	46.5758	23.728	2							1256	6.02609	21.3333	44.5111	81.427	6
1257	8.95652	128	46.7417	23.188	2							1257	7.87826	21.3333	44.1865	83.754	6
1258	9.1913	128	46.7728	23.072	2							1258	10.5391	21.3333	43.7618	86.702	6
1259	9.73043	128	46.8511	22.645	2							1259	11.8435	21.3333	43.5614	88.086	6
1260	9.73043	128	46.8456	22.706	2							1260	13.0435	21.3333	43.349	89.077	6
1261	16.3739	128	47.7704	19.904	2							1261	16.5652	21.3333	42.7593	92.55	6
1262	22.0435	128	48.5332	17.991	2							1262	19.5913	21.3333	42.2515	95.423	6
1263	0.504348	138.667	45.5769	28.773	2							1263	21.3652	21.3333	41.9459	96.962	6
1264	0.591304	138.667	45.5942	28.523	2							1264	21.5478	21.3333	41.911	97.101	6
1265	0.713043	138.667	45.6101	28.522	2							1265	27.5739	21.3333	40.9237	102.006	6
1266	0.721739	138.667	45.6254	28.57	2							1266	27.5739	21.3333	40.9308	102.128	6
1267	0.956522	138.667	45.6854	28.325	2							1267	1.69565	32	45.2916	75.85	6
1268	1.2087	138.667	45.7229	28	2							1268	1.77391	32	45.2831	75.824	6
1269	1.2087	138.667	45.7167	27.948	2							1269	2.13913	32	45.2377	76.036	6
1270	1.38261	138.667	45.7283	27.833	2							1270	2.45217	32	45.1834	76.507	6
1271	1.6	138.667	45.7718	27.741	2							1271	4.14783	32	44.946	78.187	6
1272	1.67826	138.667	45.7982	27.454	2							1272	4.24348	32	44.9352	78.399	6
1273	1.76522	138.667	45.8088	27.415	2							1273	6.02609	32	44.6772	80.175	6
1274	2.10435	138.667	45.8684	27.13	2							1274	7.87826	32	44.4448	81.491	6
1275	2.10435	138.667	45.8668	27.239	2							1275	10.5391	32	44.0847	84.005	6
1276	2.10435	138.667	45.8693	27.128	2							1276	11.8435	32	43.8996	85.29	6
1277	2.63478	138.667	45.9674	26.499	2							1277	13.0435	32	43.7463	86.387	6
1278	2.73913	138.667	45.978	26.465	2							1278	16.5652	32	43.2621	89.31	6
1279	2.94783	138.667	46.0143	26.423	2							1279	19.5913	32	42.8562	91.614	6
1280	3.01739	138.667	46.0186	26.349	2							1280	21.3652	32	42.6179	92.754	6
1281	3.4087	138.667	46.0879	25.913	2							1281	21.5478	32	42.6072	92.564	6
1282	3.48696	138.667	46.097	25.877	2							1282	27.5739	32	41.7842	96.554	6
1283	3.51304	138.667	46.0896	25.815	2							1283	27.5739	32	41.761	96.848	6
1284	3.51304	138.667	46.0997	26.106	2							1284	1.69565	42.6667	45.3151	75.562	6
1285	3.81739	138.667	46.1541	25.803	2							1285	1.77391	42.6667	45.3008	75.76	6
1286	3.82609	138.667	46.1519	25.749	2							1286	2.13913	42.6667	45.2453	75.898	6
1287	3.82609	138.667	46.1607	25.77	2							1287	2.45217	42.6667	45.2171	76.012	6
1288	3.98261	138.667	46.1649	25.794	2							1288	4.14783	42.6667	45.0365	77.327	6
1289	4.03478	138.667	46.1923	25.699	2							1289	4.24348	42.6667	45.0268	77.325	6
1290	4.46087	138.667	46.2652	25.308	2							1290	6.02609	42.6667	44.8375	78.605	6
1291	4.46087	138.667	46.2446	25.405	2							1291	7.87826	42.6667	44.6559	80.07	6
1292	4.48696	138.667	46.2578	25.204	2							1292	10.5391	42.6667	44.3831	81.92	6
1293	4.96522	138.667	46.3423	24.974	2							1293	11.8435	42.6667	44.2506	82.724	6
1294	6.53043	138.667	46.5941	23.754	2							1294	13.0435	42.6667	44.1196	83.413	6
1295	6.66957	138.667	46.6266	23.589	2							1295	16.5652	42.6667	43.7617	85.582	6
1296	6.66957	138.667	46.6222	23.603	2							1296	19.5913	42.6667	43.4577	87.266	6
1297	6.86087	138.667	46.6494	23.455	2							1297	21.3652	42.6667	43.2844	88.334	6
1298	7.73913	138.667	46.8004	22.835	2							1298	21.5478	42.6667	43.2455	88.584	6
1299	7.73913	138.667	46.8049	22.802	2							1299	27.5739	42.6667	42.5861	91.681	6
1300	8.95652	138.667	47.0015	21.894	2							1300	27.5739	42.6667	42.5709	91.853	6
1301	9.1913	138.667	47.031	21.751	2							1301	1.69565	53.3333	45.3998	75.095	6
1302	9.73043	138.667	47.13	21.364	2							1302	1.77391	53.3333	45.4014	75.151	6
1303	9.73043	138.667	47.1297	21.438	2							1303	2.13913	53.3333	45.3707	75.204	6
1304	16.3739	138.667	48.2403	18.047	2							1304	2.45217	53.3333	45.3581	75.281	6
1305	22.0435	138.667	49.1667	16.102	2							1305	4.14783	53.3333	45.2207	76.406	6
1306	0.504348	149.333	45.6043	28.557	2							1306	4.24348	53.3333	45.2093	76.424	6
1307	0.591304	149.333	45.6166	28.321	2							1307	6.02609	53.3333	45.0739	77.068	6
1308	0.713043	149.333	45.6546	28.032	2							1308	7.87826	53.3333	44.932	78.131	6
1309	0.721739	149.333	45.6637	28.128	2							1309	10.5391	53.3333	44.7261	79.496	6
1310	0.956522	149.333	45.7066	27.819	2							1310	11.8435	53.3333	44.6389	80.004	6
1311	1.2087	149.333	45.7469	27.759	2							1311	13.0435	53.3333	44.5642	80.514	6
1312	1.2087	149.333	45.7432	27.696	2							1312	16.5652	53.3333	44.2987	82.335	6
1313	1.38261	149.333	45.7853	27.45	2							1313	19.5913	53.3333	44.0736	83.567	6
1314	1.6	149.333	45.8314	27.129	2							1314	21.3652	53.3333	43.9202	84.116	6
1315	1.67826	149.333	45.8399	27.256	2							1315	21.5478	53.3333	43.8972	84.392	6
1316	1.76522	149.333	45.8636	27.278	2							1316	27.5739	53.3333	43.4437	86.518	6
1317	2.10435	149.333	45.9385	26.843	2							1317	27.5739	53.3333	43.4378	86.365	6
1318	2.10435	149.333	45.9325	26.933	2							1318	1.69565	64	45.4683	74.316	6
1319	2.10435	149.333	45.9461	26.764	2							1319	1.77391	64	45.4759	74.449	6
1320	2.63478	149.333	46.0443	26.12	2							1320	2.13913	64	45.4615	74.452	6
1321	2.73913	149.333	46.0587	26.186	2							1321	2.45217	64	45.4422	74.54	6
1322	2.94783	149.333	46.1145	25.997	2							1322	4.14783	64	45.3839	75.124	6
1323	3.01739	149.333	46.1221	25.781	2							1323	4.24348	64	45.3714	75.071	6
1324	3.4087	149.333	46.1962	25.373	2							1324	6.02609	64	45.2838	75.565	6
1325	3.48696	149.333	46.218	25.35	2							1325	7.87826	64	45.2088	76.095	6
1326	3.51304	149.333	46.2181	25.217	2							1326	10.5391	64	45.0707	76.967	6
1327	3.51304	149.333	46.2262	25.053	2							1327	11.8435	64	45.0168	77.251	6
1328	3.81739	149.333	46.2851	24.868	2							1328	13.0435	64	44.9699	77.76	6
1329	3.82609	149.333	46.2641	25.149	2							1329	16.5652	64	44.8072	78.47	6
1330	3.82609	149.333	46.2645	25.111	2							1330	19.5913	64	44.6549	79.514	6
1331	3.98261	149.333	46.2888	25.019	2							1331	21.3652	64	44.5736	79.74	6
1332	4.03478	149.333	46.282	25.095	2							1332	21.5478	64	44.5601	79.723	6
1333	4.46087	149.333	46.3776	24.32	2							1333	27.5739	64	44.2793	81.047	6
1334	4.46087	149.333	46.3818	24.46	2							1334	27.5739	64	44.2823	81.258	6
1335	4.48696	149.333	46.386	24.429	2							1335	1.69565	74.6667	45.4569	74.206	6
1336	4.96522	149.333	46.4915	23.913	2							1336	1.77391	74.6667	45.455	74.234	6
1337	6.53043	149.333	46.7967	22.654	2							1337	2.13913	74.6667	45.4574	74.585	6
1338	6.66957	149.333	46.8222	22.681	2							1338	2.45217	74.6667	45.4584	74.739	6
1339	6.66957	149.333	46.8274	22.686	2							1339	4.14783	74.6667	45.4471	74.87	6
1340	6.86087	149.333	46.8712	22.375	2							1340	4.24348	74.6667	45.4468	74.694	6
1341	7.73913	149.333	47.0493	21.544	2							1341	6.02609	74.6667	45.4247	74.592	6
1342	7.73913	149.333	47.0502	21.628	2							1342	7.87826	74.6667	45.4135	74.647	6
1343	8.95652	149.333	47.2899	20.629	2							1343	10.5391	74.6667	45.3613	74.938	6
1344	9.1913	149.333	47.3213	20.439	2							1344	11.8435	74.6667	45.3448	75.276	6
1345	9.73043	149.333	47.4276	20.025	2							1345	13.0435	74.6667	45.3286	75.439	6
1346	9.73043	149.333	47.4332	20.063	2							1346	16.5652	74.6667	45.284	75.565	6
1347	16.3739	149.333	48.7338	16.442	2							1347	19.5913	74.6667	45.2388	75.731	6
1348	22.0435	149.333	49.8532	14.05	2							1348	21.3652	74.6667	45.1951	76.111	6
1349	0.504348	160	45.6372	28.273	2							1349	21.5478	74.6667	45.1991	76.026	6
1350	0.591304	160	45.6641	28.403	2							1350	27.5739	74.6667	45.0916	76.53	6
1351	0.713043	160	45.6993	28.373	2							1351	27.5739	74.6667	45.0664	76.748	6
1352	0.721739	160	45.6777	28.566	2							1352	1.69565	85.3333	45.5628	73.649	6
1353	0.956522	160	45.7253	28.071	2							1353	1.77391	85.3333	45.55	73.819	6
1354	1.2087	160	45.7893	27.613	2							1354	2.13913	85.3333	45.555	73.642	6
1355	1.2087	160	45.7853	27.806	2							1355	2.45217	85.3333	45.5482	73.642	6
1356	1.38261	160	45.8292	27.459	2							1356	4.14783	85.3333	45.5763	73.373	6
1357	1.6	160	45.8689	27.219	2							1357	4.24348	85.3333	45.5806	73.401	6
1358	1.67826	160	45.9021	27.038	2							1358	6.02609	85.3333	45.6098	73.249	6
1359	1.76522	160	45.9191	26.924	2							1359	7.87826	85.3333	45.6509	73.324	6
1360	2.10435	160	45.9942	26.493	2							1360	10.5391	85.3333	45.6951	72.983	6
1361	2.10435	160	45.9906	26.568	2							1361	11.8435	85.3333	45.7091	72.676	6
1362	2.10435	160	45.985	26.664	2							1362	13.0435	85.3333	45.7319	72.588	6
1363	2.63478	160	46.1035	25.877	2							1363	16.5652	85.3333	45.7818	72.077	6
1364	2.73913	160	46.1231	25.796	2							1364	19.5913	85.3333	45.8317	71.938	6
1365	2.94783	160	46.1788	25.505	2							1365	21.3652	85.3333	45.8537	71.887	6
1366	3.01739	160	46.1839	25.513	2							1366	21.5478	85.3333	45.8517	71.867	6
1367	3.4087	160	46.2787	25.114	2							1367	27.5739	85.3333	45.9475	71.681	6
1368	3.48696	160	46.3194	24.927	2							1368	27.5739	85.3333	45.9577	71.356	6
1369	3.51304	160	46.321	24.801	2							1369	1.69565	96	45.5758	73.744	6
1370	3.51304	160	46.3253	24.883	2							1370	1.77391	96	45.5989	73.447	6
1371	3.81739	160	46.3919	24.486	2							1371	2.13913	96	45.6346	73.296	6
1372	3.82609	160	46.3731	24.603	2							1372	2.45217	96	45.6489	73.108	6
1373	3.82609	160	46.3809	24.665	2							1373	4.14783	96	45.7163	72.561	6
1374	3.98261	160	46.4223	24.46	2							1374	4.24348	96	45.7288	72.513	6
1375	4.03478	160	46.4276	24.229	2							1375	6.02609	96	45.8098	72.124	6
1376	4.46087	160	46.5406	23.693	2							1376	7.87826	96	45.9018	71.487	6
1377	4.46087	160	46.527	23.674	2							1377	10.5391	96	46.0185	70.703	6
1378	4.48696	160	46.5442	23.646	2							1378	11.8435	96	46.0731	70.51	6
1379	4.96522	160	46.6634	23.091	2							1379	13.0435	96	46.1303	70.228	6
1380	6.53043	160	47.0227	21.398	2							1380	16.5652	96	46.2795	69.243	6
1381	6.66957	160	47.0452	21.385	2							1381	19.5913	96	46.4092	68.595	6
1382	6.66957	160	47.0385	21.38	2							1382	21.3652	96	46.4739	68.444	6
1383	6.86087	160	47.0814	21.045	2							1383	21.5478	96	46.4857	68.171	6
1384	7.73913	160	47.2865	20.27	2							1384	27.5739	96	46.7636	66.898	6
1385	7.73913	160	47.2851	20.364	2							1385	27.5739	96	46.7549	66.953	6
1386	8.95652	160	47.5629	19.17	2							1386	1.69565	106.667	45.618	73.428	6
1387	9.1913	160	47.608	19.078	2							1387	1.77391	106.667	45.6355	73.363	6
1388	9.73043	160	47.7188	18.82	2							1388	2.13913	106.667	45.6515	73.22	6
1389	9.73043	160	47.713	18.799	2							1389	2.45217	106.667	45.6612	73.075	6
1390	16.3739	160	49.2427	14.583	2							1390	4.14783	106.667	45.8123	72.062	6
1391	22.0435	160	50.5432	12.04	2							1391	4.24348	106.667	45.833	71.858	6
1392	0.504348	0	45.3892	50.13	3							1392	6.02609	106.667	45.9659	70.96	6
1393	0.591304	0	45.3585	50.383	3							1393	7.87826	106.667	46.1021	70.211	6
1394	0.773913	0	45.3243	50.911	3							1394	10.5391	106.667	46.2995	68.78	6
1395	0.956522	0	45.3008	50.89	3							1395	11.8435	106.667	46.4062	68.06	6
1396	1.05217	0	45.2659	51.309	3							1396	13.0435	106.667	46.4892	67.674	6
1397	1.09565	0	45.2564	51.352	3							1397	16.5652	106.667	46.7537	66.451	6
1398	1.2087	0	45.2354	51.547	3							1398	19.5913	106.667	46.9739	65.273	6
1399	1.6	0	45.1366	52.197	3							1399	21.3652	106.667	47.1034	64.387	6
1400	1.61739	0	45.1345	52.156	3							1400	21.5478	106.667	47.1274	64.308	6
1401	1.61739	0	45.151	52.238	3							1401	27.5739	106.667	47.5804	62.408	6
1402	1.67826	0	45.1375	52.413	3							1402	27.5739	106.667	47.5793	62.311	6
1403	2.0087	0	45.0582	52.879	3							1403	1.69565	117.333	45.7294	72.656	6
1404	2.06957	0	45.0452	52.647	3							1404	1.77391	117.333	45.7271	72.682	6
1405	2.62609	0	44.9182	53.717	3							1405	2.13913	117.333	45.7693	72.318	6
1406	2.94783	0	44.8436	54.43	3							1406	2.45217	117.333	45.8023	71.967	6
1407	3.01739	0	44.8387	54.417	3							1407	4.14783	117.333	45.9741	70.692	6
1408	3.94783	0	44.6258	55.923	3							1408	4.24348	117.333	45.9873	70.765	6
1409	4.34783	0	44.5254	56.089	3							1409	6.02609	117.333	46.1787	69.511	6
1410	4.46087	0	44.5149	56.429	3							1410	7.87826	117.333	46.365	68.324	6
1411	4.48696	0	44.5165	56.329	3							1411	10.5391	117.333	46.6571	66.376	6
1412	4.52174	0	44.4881	56.834	3							1412	11.8435	117.333	46.8096	65.425	6
1413	4.65217	0	44.4703	56.754	3							1413	13.0435	117.333	46.9473	64.801	6
1414	5.52174	0	44.2755	58.049	3							1414	16.5652	117.333	47.3117	62.604	6
1415	6.2	0	44.1201	59.118	3							1415	19.5913	117.333	47.6219	61.213	6
1416	6.41739	0	44.0661	59.546	3							1416	21.3652	117.333	47.8329	60.286	6
1417	7.18261	0	43.887	60.403	3							1417	21.5478	117.333	47.8534	60.221	6
1418	7.85217	0	43.7143	61.571	3							1418	27.5739	117.333	48.49	57.698	6
1419	9.1913	0	43.4226	63.41	3							1419	27.5739	117.333	48.4886	57.558	6
1420	10.0522	0	43.234	64.626	3							1420	1.69565	128	45.7162	72.549	6
1421	16.087	0	41.8447	72.318	3							1421	1.77391	128	45.7136	72.735	6
1422	16.087	0	41.8515	72.274	3							1422	2.13913	128	45.7729	72.18	6
1423	16.3739	0	41.7796	72.517	3							1423	2.45217	128	45.826	71.841	6
1424	22.0435	0	40.4849	78.835	3							1424	4.14783	128	46.0661	70.391	6
1425	25.2087	0	39.7687	81.821	3							1425	4.24348	128	46.0824	70.169	6
1426	0.504348	10.6667	45.4231	50.22	3							1426	6.02609	128	46.3214	68.536	6
1427	0.591304	10.6667	45.4153	50.284	3							1427	7.87826	128	46.59	66.79	6
1428	0.773913	10.6667	45.3794	50.51	3							1428	10.5391	128	46.9598	64.59	6
1429	0.956522	10.6667	45.3341	50.798	3							1429	11.8435	128	47.135	63.442	6
1430	1.05217	10.6667	45.3117	50.855	3							1430	13.0435	128	47.3014	62.295	6
1431	1.09565	10.6667	45.3055	50.88	3							1431	16.5652	128	47.7714	59.857	6
1432	1.2087	10.6667	45.2962	51.037	3							1432	19.5913	128	48.1786	57.851	6
1433	1.6	10.6667	45.22	51.696	3							1433	21.3652	128	48.4259	56.722	6
1434	1.61739	10.6667	45.1972	51.785	3							1434	21.5478	128	48.4535	56.64	6
1435	1.61739	10.6667	45.1854	51.614	3							1435	27.5739	128	49.2597	53.231	6
1436	1.67826	10.6667	45.1875	51.749	3							1436	27.5739	128	49.2645	53.135	6
1437	2.0087	10.6667	45.114	52.267	3							1437	1.69565	138.667	45.775	72.076	6
1438	2.06957	10.6667	45.1008	52.585	3							1438	1.77391	138.667	45.7844	71.958	6
1439	2.62609	10.6667	45.0041	53.19	3							1439	2.13913	138.667	45.8442	71.498	6
1440	2.94783	10.6667	44.9306	53.641	3							1440	2.45217	138.667	45.891	71.452	6
1441	3.01739	10.6667	44.9245	53.624	3							1441	4.14783	138.667	46.1748	69.228	6
1442	3.94783	10.6667	44.735	54.821	3							1442	4.24348	138.667	46.1909	69.187	6
1443	4.34783	10.6667	44.6456	55.545	3							1443	6.02609	138.667	46.5147	67.207	6
1444	4.46087	10.6667	44.6068	55.705	3							1444	7.87826	138.667	46.8224	64.971	6
1445	4.48696	10.6667	44.612	55.631	3							1445	10.5391	138.667	47.2678	62.188	6
1446	4.52174	10.6667	44.6248	55.497	3							1446	11.8435	138.667	47.5044	60.707	6
1447	4.65217	10.6667	44.5969	55.605	3							1447	13.0435	138.667	47.6838	59.724	6
1448	5.52174	10.6667	44.4148	56.856	3							1448	16.5652	138.667	48.2441	56.704	6
1449	6.2	10.6667	44.2848	57.934	3							1449	19.5913	138.667	48.7553	54.281	6
1450	6.41739	10.6667	44.2472	58.352	3							1450	21.3652	138.667	49.0393	53.061	6
1451	7.18261	10.6667	44.0911	59.067	3							1451	21.5478	138.667	49.0706	52.925	6
1452	7.85217	10.6667	43.9498	60.123	3							1452	27.5739	138.667	50.0852	48.989	6
1453	9.1913	10.6667	43.7	61.911	3							1453	27.5739	138.667	50.0938	48.728	6
1454	10.0522	10.6667	43.5176	62.644	3							1454	1.69565	149.333	45.8633	71.417	6
1455	16.087	10.6667	42.3347	69.446	3							1455	1.77391	149.333	45.8847	71.401	6
1456	16.087	10.6667	42.3284	69.168	3							1456	2.13913	149.333	45.9513	70.879	6
1457	16.3739	10.6667	42.2772	69.439	3							1457	2.45217	149.333	46.0131	70.51	6
1458	22.0435	10.6667	41.1638	74.565	3							1458	4.14783	149.333	46.3397	67.976	6
1459	25.2087	10.6667	40.5454	77.261	3							1459	4.24348	149.333	46.3727	67.813	6
1460	0.504348	21.3333	45.4279	49.814	3							1460	6.02609	149.333	46.7085	65.72	6
1461	0.591304	21.3333	45.4188	49.886	3							1461	7.87826	149.333	47.073	63.449	6
1462	0.773913	21.3333	45.3919	50.327	3							1462	10.5391	149.333	47.6005	60.061	6
1463	0.956522	21.3333	45.3527	50.399	3							1463	11.8435	149.333	47.8647	58.795	6
1464	1.05217	21.3333	45.3319	50.368	3							1464	13.0435	149.333	48.0949	57.334	6
1465	1.09565	21.3333	45.33	50.701	3							1465	16.5652	149.333	48.7859	53.615	6
1466	1.2087	21.3333	45.3083	50.962	3							1466	19.5913	149.333	49.3889	50.69	6
1467	1.6	21.3333	45.248	51.301	3							1467	21.3652	149.333	49.7417	49.282	6
1468	1.61739	21.3333	45.2578	51.217	3							1468	21.5478	149.333	49.7717	49.186	6
1469	1.61739	21.3333	45.2466	51.372	3							1469	27.5739	149.333	50.9737	44.396	6
1470	1.67826	21.3333	45.231	51.406	3							1470	27.5739	149.333	50.9773	44.427	6
1471	2.0087	21.3333	45.1868	51.681	3							1471	1.69565	160	45.9223	71.173	6
1472	2.06957	21.3333	45.1784	51.626	3							1472	1.77391	160	45.9376	70.979	6
1473	2.62609	21.3333	45.0858	52.448	3							1473	2.13913	160	46.0181	70.419	6
1474	2.94783	21.3333	45.0267	52.915	3							1474	2.45217	160	46.0949	69.925	6
1475	3.01739	21.3333	45.0093	53.113	3							1475	4.14783	160	46.4746	67.265	6
1476	3.94783	21.3333	44.8663	53.981	3							1476	4.24348	160	46.489	67.339	6
1477	4.34783	21.3333	44.8246	54.22	3							1477	6.02609	160	46.8868	64.515	6
1478	4.46087	21.3333	44.7979	54.53	3							1478	7.87826	160	47.3257	61.676	6
1479	4.48696	21.3333	44.7805	54.742	3							1479	10.5391	160	47.9405	57.784	6
1480	4.52174	21.3333	44.7846	54.648	3							1480	11.8435	160	48.2321	56.049	6
1481	4.65217	21.3333	44.7664	54.901	3							1481	13.0435	160	48.5004	54.694	6
1482	5.52174	21.3333	44.6065	55.896	3							1482	16.5652	160	49.3173	50.636	6
1483	6.2	21.3333	44.4918	56.683	3							1483	19.5913	160	50.0122	47.507	6
1484	6.41739	21.3333	44.4682	56.927	3							1484	21.3652	160	50.3973	45.752	6
1485	7.18261	21.3333	44.3449	57.785	3							1485	21.5478	160	50.434	45.641	6
1486	7.85217	21.3333	44.2092	58.429	3							1486	27.5739	160	51.8137	40.593	6
1487	9.1913	21.3333	43.9905	60.002	3							1487	27.5739	160	51.8124	40.586	6
1488	10.0522	21.3333	43.8409	60.872	3							1488	2.13913	0	44.9735	97.933	7
1489	16.087	21.3333	42.8242	66.358	3							1489	2.13913	0	44.9763	97.906	7
1490	16.087	21.3333	42.8169	66.375	3							1490	2.86957	0	44.8141	99.196	7
1491	16.3739	21.3333	42.7825	66.363	3							1491	3.62609	0	44.6401	100.382	7
1492	22.0435	21.3333	41.8196	70.708	3							1492	4.14783	0	44.53	100.96	7
1493	25.2087	21.3333	41.3003	72.817	3							1493	5.33913	0	44.2494	102.966	7
1494	0.504348	32	45.4584	49.73	3							1494	6.31304	0	44.0393	104.677	7
1495	0.591304	32	45.4536	49.705	3							1495	10.4609	0	43.1129	111.263	7
1496	0.773913	32	45.4218	50.158	3							1496	18.6	0	41.2515	123.352	7
1497	0.956522	32	45.3729	50.401	3							1497	21.3652	0	40.6366	126.935	7
1498	1.05217	32	45.3481	50.494	3							1498	21.5478	0	40.5971	127.116	7
1499	1.09565	32	45.3463	50.43	3							1499	29.1913	0	38.852	136.419	7
1500	1.2087	32	45.3378	50.798	3							1500	36.1304	0	37.2637	144.377	7
1501	1.6	32	45.2804	51.125	3							1501	36.1304	0	37.2473	144.469	7
1502	1.61739	32	45.2829	51.143	3							1502	2.13913	10.6667	45.0938	97.149	7
1503	1.61739	32	45.2694	51.239	3							1503	2.13913	10.6667	45.0886	97.12	7
1504	1.67826	32	45.269	51.156	3							1504	2.86957	10.6667	44.937	98.139	7
1505	2.0087	32	45.2274	51.512	3							1505	3.62609	10.6667	44.7949	99.169	7
1506	2.06957	32	45.1897	51.712	3							1506	4.14783	10.6667	44.7082	99.796	7
1507	2.62609	32	45.1129	52.178	3							1507	5.33913	10.6667	44.4868	101.538	7
1508	2.94783	32	45.077	52.441	3							1508	6.31304	10.6667	44.2921	102.87	7
1509	3.01739	32	45.0733	52.719	3							1509	10.4609	10.6667	43.4741	108.444	7
1510	3.94783	32	44.943	53.264	3							1510	18.6	10.6667	41.8662	118.889	7
1511	4.34783	32	44.9008	53.749	3							1511	21.3652	10.6667	41.3173	122.073	7
1512	4.46087	32	44.8711	53.985	3							1512	21.5478	10.6667	41.257	122.584	7
1513	4.48696	32	44.8908	53.844	3							1513	29.1913	10.6667	39.745	130.761	7
1514	4.52174	32	44.8776	54.009	3							1514	36.1304	10.6667	38.3798	137.358	7
1515	4.65217	32	44.8678	53.961	3							1515	36.1304	10.6667	38.3867	137.345	7
1516	5.52174	32	44.7471	54.786	3							1516	2.13913	21.3333	45.1742	96.526	7
1517	6.2	32	44.6677	55.366	3							1517	2.13913	21.3333	45.172	96.624	7
1518	6.41739	32	44.6153	55.511	3							1518	2.86957	21.3333	45.0573	97.354	7
1519	7.18261	32	44.5261	56.099	3							1519	3.62609	21.3333	44.9043	98.674	7
1520	7.85217	32	44.4542	56.534	3							1520	4.14783	21.3333	44.8027	99.247	7
1521	9.1913	32	44.2783	57.592	3							1521	5.33913	21.3333	44.6002	100.732	7
1522	10.0522	32	44.1695	58.418	3							1522	6.31304	21.3333	44.4356	101.934	7
1523	16.087	32	43.3431	62.904	3							1523	10.4609	21.3333	43.7352	106.516	7
1524	16.087	32	43.3395	62.598	3							1524	18.6	21.3333	42.3824	115.62	7
1525	16.3739	32	43.2949	63.037	3							1525	21.3652	21.3333	41.9514	118.111	7
1526	22.0435	32	42.5181	66.578	3							1526	21.5478	21.3333	41.9207	118.237	7
1527	25.2087	32	42.0824	68.461	3							1527	29.1913	21.3333	40.6552	125.188	7
1528	0.504348	42.6667	45.4607	50.011	3							1528	36.1304	21.3333	39.5135	130.607	7
1529	0.591304	42.6667	45.445	50.219	3							1529	36.1304	21.3333	39.5005	130.416	7
1530	0.773913	42.6667	45.4387	50.236	3							1530	2.13913	32	45.2556	96.135	7
1531	0.956522	42.6667	45.4124	50.27	3							1531	2.13913	32	45.2405	96.348	7
1532	1.05217	42.6667	45.3896	50.45	3							1532	2.86957	32	45.1226	97.225	7
1533	1.09565	42.6667	45.4022	50.526	3							1533	3.62609	32	45.0149	97.806	7
1534	1.2087	42.6667	45.3996	50.561	3							1534	4.14783	32	44.9643	97.897	7
1535	1.6	42.6667	45.3454	50.671	3							1535	5.33913	32	44.7854	99.21	7
1536	1.61739	42.6667	45.337	50.746	3							1536	6.31304	32	44.6491	100.029	7
1537	1.61739	42.6667	45.357	51.033	3							1537	10.4609	32	44.0808	104.188	7
1538	1.67826	42.6667	45.3593	50.908	3							1538	18.6	32	42.9735	111.197	7
1539	2.0087	42.6667	45.3236	50.989	3							1539	21.3652	32	42.6032	113.583	7
1540	2.06957	42.6667	45.3203	51.008	3							1540	21.5478	32	42.596	113.628	7
1541	2.62609	42.6667	45.2693	51.439	3							1541	29.1913	32	41.5418	119.194	7
1542	2.94783	42.6667	45.2206	51.443	3							1542	36.1304	32	40.5773	124.034	7
1543	3.01739	42.6667	45.2065	51.82	3							1543	36.1304	32	40.5934	123.75	7
1544	3.94783	42.6667	45.0948	52.667	3							1544	2.13913	42.6667	45.2771	95.659	7
1545	4.34783	42.6667	45.0581	52.704	3							1545	2.13913	42.6667	45.2716	95.598	7
1546	4.46087	42.6667	45.05	52.939	3							1546	2.86957	42.6667	45.2226	96.134	7
1547	4.48696	42.6667	45.0425	52.929	3							1547	3.62609	42.6667	45.1454	96.631	7
1548	4.52174	42.6667	45.0451	52.938	3							1548	4.14783	42.6667	45.0842	97.052	7
1549	4.65217	42.6667	45.0285	53.008	3							1549	5.33913	42.6667	44.98	98.071	7
1550	5.52174	42.6667	44.9257	53.487	3							1550	6.31304	42.6667	44.8723	98.671	7
1551	6.2	42.6667	44.8681	54.036	3							1551	10.4609	42.6667	44.439	101.792	7
1552	6.41739	42.6667	44.8271	54.574	3							1552	18.6	42.6667	43.5615	107.156	7
1553	7.18261	42.6667	44.7379	54.966	3							1553	21.3652	42.6667	43.2438	109.324	7
1554	7.85217	42.6667	44.6772	55.265	3							1554	21.5478	42.6667	43.229	109.178	7
1555	9.1913	42.6667	44.5294	56.188	3							1555	29.1913	42.6667	42.4117	113.354	7
1556	10.0522	42.6667	44.4239	56.812	3							1556	36.1304	42.6667	41.6836	117.003	7
1557	16.087	42.6667	43.7957	60.011	3							1557	36.1304	42.6667	41.6696	116.969	7
1558	16.087	42.6667	43.7932	60.07	3							1558	2.13913	53.3333	45.3072	95.419	7
1559	16.3739	42.6667	43.7502	60.522	3							1559	2.13913	53.3333	45.2948	95.536	7
1560	22.0435	42.6667	43.1574	63.069	3							1560	2.86957	53.3333	45.2439	95.942	7
1561	25.2087	42.6667	42.83	64.422	3							1561	3.62609	53.3333	45.2107	96.193	7
1562	0.504348	53.3333	45.5023	49.46	3							1562	4.14783	53.3333	45.1552	96.711	7
1563	0.591304	53.3333	45.4811	49.572	3							1563	5.33913	53.3333	45.0707	97.412	7
1564	0.773913	53.3333	45.4653	49.727	3							1564	6.31304	53.3333	44.9891	97.868	7
1565	0.956522	53.3333	45.4421	49.827	3							1565	10.4609	53.3333	44.6892	100.174	7
1566	1.05217	53.3333	45.4218	50.035	3							1566	18.6	53.3333	44.0635	103.908	7
1567	1.09565	53.3333	45.434	49.865	3							1567	21.3652	53.3333	43.8334	105.207	7
1568	1.2087	53.3333	45.4398	49.865	3							1568	21.5478	53.3333	43.8177	105.532	7
1569	1.6	53.3333	45.398	50.279	3							1569	29.1913	53.3333	43.2257	108.558	7
1570	1.61739	53.3333	45.3839	50.337	3							1570	36.1304	53.3333	42.7189	110.785	7
1571	1.61739	53.3333	45.4028	50.397	3							1571	36.1304	53.3333	42.7237	110.85	7
1572	1.67826	53.3333	45.4168	50.459	3							1572	2.13913	64	45.3949	94.823	7
1573	2.0087	53.3333	45.3815	50.345	3							1573	2.13913	64	45.4189	94.823	7
1574	2.06957	53.3333	45.3839	50.525	3							1574	2.86957	64	45.3782	95.16	7
1575	2.62609	53.3333	45.3364	50.731	3							1575	3.62609	64	45.321	95.515	7
1576	2.94783	53.3333	45.3113	50.878	3							1576	4.14783	64	45.2797	95.712	7
1577	3.01739	53.3333	45.3043	50.958	3							1577	5.33913	64	45.2307	96.136	7
1578	3.94783	53.3333	45.2257	51.215	3							1578	6.31304	64	45.1801	96.403	7
1579	4.34783	53.3333	45.1919	51.81	3							1579	10.4609	64	44.9738	98.229	7
1580	4.46087	53.3333	45.1719	51.925	3							1580	18.6	64	44.613	100.39	7
1581	4.48696	53.3333	45.1618	51.817	3							1581	21.3652	64	44.4773	101.042	7
1582	4.52174	53.3333	45.1462	51.86	3							1582	21.5478	64	44.4753	101.327	7
1583	4.65217	53.3333	45.1345	51.916	3							1583	29.1913	64	44.1493	102.762	7
1584	5.52174	53.3333	45.0656	52.412	3							1584	36.1304	64	43.8513	104.083	7
1585	6.2	53.3333	45.0074	52.88	3							1585	36.1304	64	43.8472	103.832	7
1586	6.41739	53.3333	44.9914	52.94	3							1586	2.13913	74.6667	45.4679	94.391	7
1587	7.18261	53.3333	44.9491	53.163	3							1587	2.13913	74.6667	45.4555	94.152	7
1588	7.85217	53.3333	44.9145	53.617	3							1588	2.86957	74.6667	45.4595	94.485	7
1589	9.1913	53.3333	44.8105	53.963	3							1589	3.62609	74.6667	45.4595	94.467	7
1590	10.0522	53.3333	44.755	54.457	3							1590	4.14783	74.6667	45.4664	94.226	7
1591	16.087	53.3333	44.2856	56.882	3							1591	5.33913	74.6667	45.449	94.461	7
1592	16.087	53.3333	44.3067	56.783	3							1592	6.31304	74.6667	45.4592	94.334	7
1593	16.3739	53.3333	44.3061	56.786	3							1593	10.4609	74.6667	45.3782	95.378	7
1594	22.0435	53.3333	43.8717	58.607	3							1594	18.6	74.6667	45.2435	95.835	7
1595	25.2087	53.3333	43.6182	59.699	3							1595	21.3652	74.6667	45.1908	96.336	7
1596	0.504348	64	45.4833	49.538	3							1596	21.5478	74.6667	45.1758	96.476	7
1597	0.591304	64	45.4724	49.661	3							1597	29.1913	74.6667	45.0539	97.097	7
1598	0.773913	64	45.4763	49.718	3							1598	36.1304	74.6667	44.935	97.698	7
1599	0.956522	64	45.4642	49.808	3							1599	36.1304	74.6667	44.9492	97.59	7
1600	1.05217	64	45.4525	49.842	3							1600	2.13913	85.3333	45.5478	93.956	7
1601	1.09565	64	45.4534	50.152	3							1601	2.13913	85.3333	45.5617	93.788	7
1602	1.2087	64	45.4585	49.911	3							1602	2.86957	85.3333	45.5907	93.619	7
1603	1.6	64	45.4567	50.1	3							1603	3.62609	85.3333	45.6099	93.614	7
1604	1.61739	64	45.4651	49.965	3							1604	4.14783	85.3333	45.5954	93.377	7
1605	1.61739	64	45.4523	50.016	3							1605	5.33913	85.3333	45.5787	93.522	7
1606	1.67826	64	45.4424	49.879	3							1606	6.31304	85.3333	45.5926	93.52	7
1607	2.0087	64	45.4242	49.984	3							1607	10.4609	85.3333	45.664	92.86	7
1608	2.06957	64	45.4244	50.078	3							1608	18.6	85.3333	45.8006	92.052	7
1609	2.62609	64	45.3973	50.426	3							1609	21.3652	85.3333	45.8228	92.043	7
1610	2.94783	64	45.3789	50.499	3							1610	21.5478	85.3333	45.8162	91.773	7
1611	3.01739	64	45.3664	50.696	3							1611	29.1913	85.3333	45.9356	91.416	7
1612	3.94783	64	45.3225	50.965	3							1612	36.1304	85.3333	46.0674	90.627	7
1613	4.34783	64	45.3171	51.069	3							1613	36.1304	85.3333	46.0667	91.023	7
1614	4.46087	64	45.2972	51.111	3							1614	2.13913	96	45.6201	93.482	7
1615	4.48696	64	45.2955	51.261	3							1615	2.13913	96	45.6437	93.289	7
1616	4.52174	64	45.2803	51.341	3							1616	2.86957	96	45.679	93.242	7
1617	4.65217	64	45.2764	51.385	3							1617	3.62609	96	45.714	92.926	7
1618	5.52174	64	45.237	51.579	3							1618	4.14783	96	45.7088	93.117	7
1619	6.2	64	45.2166	51.554	3							1619	5.33913	96	45.7632	92.505	7
1620	6.41739	64	45.2134	51.528	3							1620	6.31304	96	45.7883	92.074	7
1621	7.18261	64	45.1836	51.904	3							1621	10.4609	96	45.9765	90.813	7
1622	7.85217	64	45.1583	51.863	3							1622	18.6	96	46.3456	88.269	7
1623	9.1913	64	45.1094	52.384	3							1623	21.3652	96	46.4732	87.874	7
1624	10.0522	64	45.0678	52.691	3							1624	21.5478	96	46.5123	87.486	7
1625	16.087	64	44.7829	53.863	3							1625	29.1913	96	46.8687	86.059	7
1626	16.087	64	44.7771	54.272	3							1626	36.1304	96	47.1681	84.571	7
1627	16.3739	64	44.7726	53.974	3							1627	36.1304	96	47.1742	84.661	7
1628	22.0435	64	44.5045	55.142	3							1628	2.13913	106.667	45.7067	92.459	7
1629	25.2087	64	44.3594	55.608	3							1629	2.13913	106.667	45.6919	92.559	7
1630	0.504348	74.6667	45.485	49.616	3							1630	2.86957	106.667	45.7162	92.474	7
1631	0.591304	74.6667	45.4939	49.594	3							1631	3.62609	106.667	45.7888	92.259	7
1632	0.773913	74.6667	45.4687	49.613	3							1632	4.14783	106.667	45.8314	92.044	7
1633	0.956522	74.6667	45.4713	49.837	3							1633	5.33913	106.667	45.9248	91.466	7
1634	1.05217	74.6667	45.4788	49.784	3							1634	6.31304	106.667	46.0044	90.779	7
1635	1.09565	74.6667	45.476	49.522	3							1635	10.4609	106.667	46.3297	88.429	7
1636	1.2087	74.6667	45.4853	49.422	3							1636	18.6	106.667	46.9508	84.576	7
1637	1.6	74.6667	45.4751	49.582	3							1637	21.3652	106.667	47.1461	83.735	7
1638	1.61739	74.6667	45.4731	49.636	3							1638	21.5478	106.667	47.1691	83.569	7
1639	1.61739	74.6667	45.4822	49.616	3							1639	29.1913	106.667	47.7516	80.562	7
1640	1.67826	74.6667	45.4633	49.606	3							1640	36.1304	106.667	48.2871	78.283	7
1641	2.0087	74.6667	45.4523	49.863	3							1641	36.1304	106.667	48.2987	78.243	7
1642	2.06957	74.6667	45.4685	49.919	3							1642	2.13913	117.333	45.7668	92.251	7
1643	2.62609	74.6667	45.47	49.751	3							1643	2.13913	117.333	45.7602	92.264	7
1644	2.94783	74.6667	45.4564	49.843	3							1644	2.86957	117.333	45.8431	91.599	7
1645	3.01739	74.6667	45.4648	49.688	3							1645	3.62609	117.333	45.9383	90.861	7
1646	3.94783	74.6667	45.438	49.778	3							1646	4.14783	117.333	45.9808	90.522	7
1647	4.34783	74.6667	45.4228	50.104	3							1647	5.33913	117.333	46.0958	89.844	7
1648	4.46087	74.6667	45.4217	50.09	3							1648	6.31304	117.333	46.1904	89.508	7
1649	4.48696	74.6667	45.425	50.132	3							1649	10.4609	117.333	46.6336	86.45	7
1650	4.52174	74.6667	45.44	50.1	3							1650	18.6	117.333	47.5093	81.067	7
1651	4.65217	74.6667	45.4426	49.861	3							1651	21.3652	117.333	47.7878	79.366	7
1652	5.52174	74.6667	45.4307	50.158	3							1652	21.5478	117.333	47.7848	79.547	7
1653	6.2	74.6667	45.4226	50.12	3							1653	29.1913	117.333	48.5881	75.764	7
1654	6.41739	74.6667	45.4132	50.017	3							1654	36.1304	117.333	49.3493	72.683	7
1655	7.18261	74.6667	45.4014	50.133	3							1655	36.1304	117.333	49.3672	72.453	7
1656	7.85217	74.6667	45.3815	50.411	3							1656	2.13913	128	45.8259	91.941	7
1657	9.1913	74.6667	45.3562	50.657	3							1657	2.13913	128	45.8438	91.609	7
1658	10.0522	74.6667	45.3436	50.409	3							1658	2.86957	128	45.9362	91.159	7
1659	16.087	74.6667	45.2463	50.95	3							1659	3.62609	128	46.0312	90.645	7
1660	16.087	74.6667	45.251	51.028	3							1660	4.14783	128	46.1022	90.073	7
1661	16.3739	74.6667	45.2498	51.14	3							1661	5.33913	128	46.2746	88.56	7
1662	22.0435	74.6667	45.146	51.338	3							1662	6.31304	128	46.3979	87.663	7
1663	25.2087	74.6667	45.1062	51.456	3							1663	10.4609	128	46.9646	83.904	7
1664	0.504348	85.3333	45.4961	49.638	3							1664	18.6	128	48.0772	77.245	7
1665	0.591304	85.3333	45.4945	49.513	3							1665	21.3652	128	48.4326	75.329	7
1666	0.773913	85.3333	45.5072	49.472	3							1666	21.5478	128	48.4401	75.437	7
1667	0.956522	85.3333	45.5187	49.516	3							1667	29.1913	128	49.5076	70.408	7
1668	1.05217	85.3333	45.524	49.577	3							1668	36.1304	128	50.4442	66.627	7
1669	1.09565	85.3333	45.5271	49.565	3							1669	36.1304	128	50.4452	66.653	7
1670	1.2087	85.3333	45.5368	49.148	3							1670	2.13913	138.667	45.8507	91.57	7
1671	1.6	85.3333	45.5466	49.149	3							1671	2.13913	138.667	45.84	91.389	7
1672	1.61739	85.3333	45.5434	49.193	3							1672	2.86957	138.667	45.9367	91.102	7
1673	1.61739	85.3333	45.5334	49.201	3							1673	3.62609	138.667	46.0764	90.064	7
1674	1.67826	85.3333	45.5241	49.254	3							1674	4.14783	138.667	46.1609	89.38	7
1675	2.0087	85.3333	45.525	49.269	3							1675	5.33913	138.667	46.3675	87.886	7
1676	2.06957	85.3333	45.5303	49.159	3							1676	6.31304	138.667	46.5336	86.915	7
1677	2.62609	85.3333	45.5424	49.131	3							1677	10.4609	138.667	47.2585	81.949	7
1678	2.94783	85.3333	45.5423	49.135	3							1678	18.6	138.667	48.6179	73.831	7
1679	3.01739	85.3333	45.5436	49.154	3							1679	21.3652	138.667	49.0931	71.528	7
1680	3.94783	85.3333	45.5635	49.008	3							1680	21.5478	138.667	49.1203	71.257	7
1681	4.34783	85.3333	45.5809	48.957	3							1681	29.1913	138.667	50.3836	65.604	7
1682	4.46087	85.3333	45.579	48.95	3							1682	36.1304	138.667	51.5122	61.583	7
1683	4.48696	85.3333	45.592	48.872	3							1683	36.1304	138.667	51.5151	61.498	7
1684	4.52174	85.3333	45.592	49.003	3							1684	2.13913	149.333	45.9351	90.718	7
1685	4.65217	85.3333	45.6002	48.933	3							1685	2.13913	149.333	45.9357	90.775	7
1686	5.52174	85.3333	45.6069	48.648	3							1686	2.86957	149.333	46.0677	89.852	7
1687	6.2	85.3333	45.6181	48.655	3							1687	3.62609	149.333	46.2266	88.715	7
1688	6.41739	85.3333	45.6182	48.686	3							1688	4.14783	149.333	46.3564	87.904	7
1689	7.18261	85.3333	45.6381	48.526	3							1689	5.33913	149.333	46.6164	86.345	7
1690	7.85217	85.3333	45.6455	48.592	3							1690	6.31304	149.333	46.7859	85.207	7
1691	9.1913	85.3333	45.6647	48.379	3							1691	10.4609	149.333	47.592	79.797	7
1692	10.0522	85.3333	45.6801	48.443	3							1692	18.6	149.333	49.1929	70.465	7
1693	16.087	85.3333	45.7692	47.855	3							1693	21.3652	149.333	49.7413	67.421	7
1694	16.087	85.3333	45.7584	48.177	3							1694	21.5478	149.333	49.7635	67.358	7
1695	16.3739	85.3333	45.7409	48.158	3							1695	29.1913	149.333	51.2644	60.769	7
1696	22.0435	85.3333	45.8217	47.794	3							1696	36.1304	149.333	52.6161	55.704	7
1697	25.2087	85.3333	45.8755	47.767	3							1697	36.1304	149.333	52.6161	55.837	7
1698	0.504348	96	45.5764	49.211	3							1698	2.13913	160	45.9926	90.611	7
1699	0.591304	96	45.5607	49.14	3							1699	2.13913	160	46.0065	90.853	7
1700	0.773913	96	45.5659	49.114	3							1700	2.86957	160	46.1841	89.462	7
1701	0.956522	96	45.5666	48.984	3							1701	3.62609	160	46.3543	88.333	7
1702	1.05217	96	45.5693	49.199	3							1702	4.14783	160	46.4655	87.384	7
1703	1.09565	96	45.5536	49.233	3							1703	5.33913	160	46.7252	85.624	7
1704	1.2087	96	45.5605	48.999	3							1704	6.31304	160	46.9446	83.962	7
1705	1.6	96	45.5807	48.951	3							1705	10.4609	160	47.8937	77.939	7
1706	1.61739	96	45.578	48.832	3							1706	18.6	160	49.7428	66.947	7
1707	1.61739	96	45.5666	49.032	3							1707	21.3652	160	50.3732	63.884	7
1708	1.67826	96	45.5718	48.93	3							1708	21.5478	160	50.4017	63.7	7
1709	2.0087	96	45.6112	48.785	3							1709	29.1913	160	52.1381	56.31	7
1710	2.06957	96	45.6193	48.851	3							1710	36.1304	160	53.7156	50.756	7
1711	2.62609	96	45.6535	48.536	3							1711	36.1304	160	53.7367	50.695	7
1712	2.94783	96	45.6644	48.472	3							1712	1.04348	0	45.2851	100.558	8
1713	3.01739	96	45.6739	48.485	3							1713	1.13913	0	45.2494	100.717	8
1714	3.94783	96	45.7131	48.179	3							1714	1.43478	0	45.1923	101.085	8
1715	4.34783	96	45.7279	47.951	3							1715	2.71304	0	44.8897	103.351	8
1716	4.46087	96	45.7282	48.067	3							1716	4.14783	0	44.5497	105.978	8
1717	4.48696	96	45.7302	48.163	3							1717	5.73913	0	44.1825	108.865	8
1718	4.52174	96	45.7281	48.045	3							1718	6.49565	0	44.0076	109.965	8
1719	4.65217	96	45.72	48.15	3							1719	10.2261	0	43.1601	116.077	8
1720	5.52174	96	45.7751	47.51	3							1720	11.4783	0	42.9145	117.894	8
1721	6.2	96	45.8112	47.489	3							1721	13.3826	0	42.4711	121.062	8
1722	6.41739	96	45.8211	47.519	3							1722	13.5652	0	42.453	121.084	8
1723	7.18261	96	45.8466	47.269	3							1723	20.0087	0	40.9327	130.71	8
1724	7.85217	96	45.8776	47.011	3							1724	23.5565	0	40.1283	135.649	8
1725	9.1913	96	45.9474	46.754	3							1725	29.1913	0	38.8468	142.702	8
1726	10.0522	96	45.9853	46.589	3							1726	55.8783	0	32.8015	170.76	8
1727	16.087	96	46.2652	45.218	3							1727	1.04348	10.6667	45.3643	99.717	8
1728	16.087	96	46.2636	45.251	3							1728	1.13913	10.6667	45.3152	99.987	8
1729	16.3739	96	46.2791	44.98	3							1729	1.43478	10.6667	45.2523	100.591	8
1730	22.0435	96	46.5445	44.124	3							1730	2.71304	10.6667	44.9906	102.592	8
1731	25.2087	96	46.6968	43.402	3							1731	4.14783	10.6667	44.73	104.562	8
1732	0.504348	106.667	45.5284	49.429	3							1732	5.73913	10.6667	44.4443	106.828	8
1733	0.591304	106.667	45.5384	49.279	3							1733	6.49565	10.6667	44.2635	108.344	8
1734	0.773913	106.667	45.5482	49.126	3							1734	10.2261	10.6667	43.5348	113.404	8
1735	0.956522	106.667	45.5733	48.898	3							1735	11.4783	10.6667	43.2917	115.212	8
1736	1.05217	106.667	45.5818	48.952	3							1736	13.3826	10.6667	42.9092	117.711	8
1737	1.09565	106.667	45.6081	48.817	3							1737	13.5652	10.6667	42.8571	118.176	8
1738	1.2087	106.667	45.6177	48.916	3							1738	20.0087	10.6667	41.585	126.435	8
1739	1.6	106.667	45.6342	48.472	3							1739	23.5565	10.6667	40.8693	130.381	8
1740	1.61739	106.667	45.6284	48.662	3							1740	29.1913	10.6667	39.794	136.439	8
1741	1.61739	106.667	45.6399	48.693	3							1741	55.8783	10.6667	34.5291	160.358	8
1742	1.67826	106.667	45.6542	48.5	3							1742	1.04348	21.3333	45.3779	100.004	8
1743	2.0087	106.667	45.6743	48.298	3							1743	1.13913	21.3333	45.3615	100.19	8
1744	2.06957	106.667	45.6764	48.201	3							1744	1.43478	21.3333	45.2773	100.82	8
1745	2.62609	106.667	45.7196	48.078	3							1745	2.71304	21.3333	45.0828	101.947	8
1746	2.94783	106.667	45.7432	47.822	3							1746	4.14783	21.3333	44.8912	103.593	8
1747	3.01739	106.667	45.7437	47.767	3							1747	5.73913	21.3333	44.5977	105.569	8
1748	3.94783	106.667	45.7998	47.388	3							1748	6.49565	21.3333	44.485	106.604	8
1749	4.34783	106.667	45.8398	47.18	3							1749	10.2261	21.3333	43.8318	111.369	8
1750	4.46087	106.667	45.8548	46.931	3							1750	11.4783	21.3333	43.6162	112.757	8
1751	4.48696	106.667	45.8562	47.108	3							1751	13.3826	21.3333	43.3019	114.978	8
1752	4.52174	106.667	45.8462	47.046	3							1752	13.5652	21.3333	43.2715	115.027	8
1753	4.65217	106.667	45.8652	47.253	3							1753	20.0087	21.3333	42.2178	121.787	8
1754	5.52174	106.667	45.9274	46.746	3							1754	23.5565	21.3333	41.6096	125.333	8
1755	6.2	106.667	45.9639	46.429	3							1755	29.1913	21.3333	40.6961	130.378	8
1756	6.41739	106.667	45.9919	46.329	3							1756	55.8783	21.3333	36.2014	150.997	8
1757	7.18261	106.667	46.0361	45.965	3							1757	1.04348	32	45.3628	99.8	8
1758	7.85217	106.667	46.0819	45.816	3							1758	1.13913	32	45.3676	99.555	8
1759	9.1913	106.667	46.1842	45.044	3							1759	1.43478	32	45.3262	100.04	8
1760	10.0522	106.667	46.2718	44.629	3							1760	2.71304	32	45.1694	101.186	8
1761	16.087	106.667	46.7176	42.399	3							1761	4.14783	32	44.9962	102.334	8
1762	16.087	106.667	46.7109	42.358	3							1762	5.73913	32	44.7977	104.016	8
1763	16.3739	106.667	46.7426	42.111	3							1763	6.49565	32	44.626	105.16	8
1764	22.0435	106.667	47.1734	40.585	3							1764	10.2261	32	44.1137	108.815	8
1765	25.2087	106.667	47.4127	39.902	3							1765	11.4783	32	43.9965	109.933	8
1766	0.504348	117.333	45.5813	48.785	3							1766	13.3826	32	43.6842	111.977	8
1767	0.591304	117.333	45.5987	48.581	3							1767	13.5652	32	43.666	112.29	8
1768	0.773913	117.333	45.6417	48.406	3							1768	20.0087	32	42.8129	117.714	8
1769	0.956522	117.333	45.6524	48.277	3							1769	23.5565	32	42.3175	120.281	8
1770	1.05217	117.333	45.6497	48.412	3							1770	29.1913	32	41.5223	124.8	8
1771	1.09565	117.333	45.6572	48.521	3							1771	55.8783	32	37.8997	141.142	8
1772	1.2087	117.333	45.6616	48.443	3							1772	1.04348	42.6667	45.3809	99.591	8
1773	1.6	117.333	45.6997	48.197	3							1773	1.13913	42.6667	45.3638	100.037	8
1774	1.61739	117.333	45.6939	48.246	3							1774	1.43478	42.6667	45.3147	100.199	8
1775	1.61739	117.333	45.6945	48.304	3							1775	2.71304	42.6667	45.1877	101.272	8
1776	1.67826	117.333	45.7246	47.944	3							1776	4.14783	42.6667	45.0472	102.148	8
1777	2.0087	117.333	45.7472	47.599	3							1777	5.73913	42.6667	44.8902	103.261	8
1778	2.06957	117.333	45.7589	47.532	3							1778	6.49565	42.6667	44.8299	103.639	8
1779	2.62609	117.333	45.8182	47.211	3							1779	10.2261	42.6667	44.4309	106.499	8
1780	2.94783	117.333	45.8459	47.058	3							1780	11.4783	42.6667	44.322	107.343	8
1781	3.01739	117.333	45.8523	47.181	3							1781	13.3826	42.6667	44.1243	108.558	8
1782	3.94783	117.333	45.9498	46.415	3							1782	13.5652	42.6667	44.1184	108.902	8
1783	4.34783	117.333	45.9868	45.905	3							1783	20.0087	42.6667	43.4571	113.223	8
1784	4.46087	117.333	45.9927	45.917	3							1784	23.5565	42.6667	43.0393	115.632	8
1785	4.48696	117.333	45.9934	45.796	3							1785	29.1913	42.6667	42.4469	118.983	8
1786	4.52174	117.333	45.9975	45.898	3							1786	55.8783	42.6667	39.5691	131.47	8
1787	4.65217	117.333	45.9931	46.006	3							1787	1.04348	53.3333	45.4051	99.674	8
1788	5.52174	117.333	46.085	45.502	3							1788	1.13913	53.3333	45.3702	99.735	8
1789	6.2	117.333	46.1631	45.001	3							1789	1.43478	53.3333	45.3375	100.155	8
1790	6.41739	117.333	46.1813	44.83	3							1790	2.71304	53.3333	45.2385	100.66	8
1791	7.18261	117.333	46.2666	44.456	3							1791	4.14783	53.3333	45.1177	101.444	8
1792	7.85217	117.333	46.35	43.879	3							1792	5.73913	53.3333	45.0246	102.214	8
1793	9.1913	117.333	46.4959	43.194	3							1793	6.49565	53.3333	44.9795	102.809	8
1794	10.0522	117.333	46.5918	42.416	3							1794	10.2261	53.3333	44.6935	104.787	8
1795	16.087	117.333	47.237	39.578	3							1795	11.4783	53.3333	44.5994	105.473	8
1796	16.087	117.333	47.2284	39.607	3							1796	13.3826	53.3333	44.4489	106.386	8
1797	16.3739	117.333	47.2539	39.402	3							1797	13.5652	53.3333	44.4223	106.695	8
1798	22.0435	117.333	47.8536	37.106	3							1798	20.0087	53.3333	43.9495	109.452	8
1799	25.2087	117.333	48.1927	36.042	3							1799	23.5565	53.3333	43.6936	111.183	8
1800	0.504348	128	45.5643	49.132	3							1800	29.1913	53.3333	43.2732	113.522	8
1801	0.591304	128	45.5755	48.999	3							1801	55.8783	53.3333	41.2139	122.299	8
1802	0.773913	128	45.6029	48.831	3							1802	1.04348	64	45.4615	99.118	8
1803	0.956522	128	45.6323	48.671	3							1803	1.13913	64	45.4778	99.203	8
1804	1.05217	128	45.6409	48.296	3							1804	1.43478	64	45.4593	99.033	8
1805	1.09565	128	45.6327	48.341	3							1805	2.71304	64	45.3853	99.499	8
1806	1.2087	128	45.6602	48.187	3							1806	4.14783	64	45.3311	100.168	8
1807	1.6	128	45.7197	47.874	3							1807	5.73913	64	45.2871	100.475	8
1808	1.61739	128	45.7027	48.084	3							1808	6.49565	64	45.2171	100.47	8
1809	1.61739	128	45.6876	48.295	3							1809	10.2261	64	45.0443	102.16	8
1810	1.67826	128	45.715	48.195	3							1810	11.4783	64	44.9819	102.67	8
1811	2.0087	128	45.7659	47.739	3							1811	13.3826	64	44.8998	103.124	8
1812	2.06957	128	45.7828	47.605	3							1812	13.5652	64	44.8906	103.021	8
1813	2.62609	128	45.8545	47.221	3							1813	20.0087	64	44.5721	105.227	8
1814	2.94783	128	45.9165	46.756	3							1814	23.5565	64	44.4215	105.936	8
1815	3.01739	128	45.9339	46.628	3							1815	29.1913	64	44.1631	107.29	8
1816	3.94783	128	46.0416	45.673	3							1816	55.8783	64	42.9607	112.307	8
1817	4.34783	128	46.1061	45.334	3							1817	1.04348	74.6667	45.503	98.71	8
1818	4.46087	128	46.1181	45.457	3							1818	1.13913	74.6667	45.5157	98.745	8
1819	4.48696	128	46.1238	45.337	3							1819	1.43478	74.6667	45.4773	99.179	8
1820	4.52174	128	46.1235	45.414	3							1820	2.71304	74.6667	45.489	98.905	8
1821	4.65217	128	46.1499	45.094	3							1821	4.14783	74.6667	45.4387	99.259	8
1822	5.52174	128	46.2663	44.315	3							1822	5.73913	74.6667	45.4053	99.519	8
1823	6.2	128	46.3488	43.922	3							1823	6.49565	74.6667	45.3933	99.641	8
1824	6.41739	128	46.3793	43.86	3							1824	10.2261	74.6667	45.3442	99.948	8
1825	7.18261	128	46.4753	43.175	3							1825	11.4783	74.6667	45.3133	99.982	8
1826	7.85217	128	46.5536	42.575	3							1826	13.3826	74.6667	45.2999	100.086	8
1827	9.1913	128	46.7494	41.68	3							1827	13.5652	74.6667	45.2815	100.179	8
1828	10.0522	128	46.8846	40.881	3							1828	20.0087	74.6667	45.1882	100.489	8
1829	16.087	128	47.7179	37.157	3							1829	23.5565	74.6667	45.1695	100.675	8
1830	16.087	128	47.725	37.011	3							1830	29.1913	74.6667	45.0492	101.421	8
1831	16.3739	128	47.7702	36.769	3							1831	55.8783	74.6667	44.6668	103.183	8
1832	22.0435	128	48.5348	34.03	3							1832	1.04348	85.3333	45.5058	98.661	8
1833	25.2087	128	48.9649	32.757	3							1833	1.13913	85.3333	45.5118	98.595	8
1834	0.504348	138.667	45.5762	49.215	3							1834	1.43478	85.3333	45.525	98.277	8
1835	0.591304	138.667	45.5857	48.972	3							1835	2.71304	85.3333	45.5402	98.511	8
1836	0.773913	138.667	45.6285	48.764	3							1836	4.14783	85.3333	45.5504	98.336	8
1837	0.956522	138.667	45.69	48.391	3							1837	5.73913	85.3333	45.5765	97.97	8
1838	1.05217	138.667	45.7342	48.084	3							1838	6.49565	85.3333	45.5856	98.114	8
1839	1.09565	138.667	45.7319	48.266	3							1839	10.2261	85.3333	45.6282	97.85	8
1840	1.2087	138.667	45.745	47.989	3							1840	11.4783	85.3333	45.6909	97.602	8
1841	1.6	138.667	45.8201	47.588	3							1841	13.3826	85.3333	45.7388	97.241	8
1842	1.61739	138.667	45.8076	47.452	3							1842	13.5652	85.3333	45.7198	97.33	8
1843	1.61739	138.667	45.7905	47.482	3							1843	20.0087	85.3333	45.7961	97.011	8
1844	1.67826	138.667	45.8056	47.357	3							1844	23.5565	85.3333	45.8915	96.223	8
1845	2.0087	138.667	45.8655	47.105	3							1845	29.1913	85.3333	45.9436	95.81	8
1846	2.06957	138.667	45.8643	46.758	3							1846	55.8783	85.3333	46.3766	94.171	8
1847	2.62609	138.667	45.9519	46.471	3							1847	1.04348	96	45.5715	98.13	8
1848	2.94783	138.667	45.9887	46.239	3							1848	1.13913	96	45.5898	98.142	8
1849	3.01739	138.667	45.9951	45.991	3							1849	1.43478	96	45.6177	97.529	8
1850	3.94783	138.667	46.15	45.33	3							1850	2.71304	96	45.6634	97.593	8
1851	4.34783	138.667	46.2161	44.675	3							1851	4.14783	96	45.7248	96.779	8
1852	4.46087	138.667	46.2191	44.676	3							1852	5.73913	96	45.812	96.597	8
1853	4.48696	138.667	46.2152	44.727	3							1853	6.49565	96	45.8161	96.422	8
1854	4.52174	138.667	46.2328	44.646	3							1854	10.2261	96	45.9957	95.057	8
1855	4.65217	138.667	46.2661	44.475	3							1855	11.4783	96	46.0392	94.627	8
1856	5.52174	138.667	46.4079	43.658	3							1856	13.3826	96	46.1331	94.087	8
1857	6.2	138.667	46.5275	42.714	3							1857	13.5652	96	46.1593	93.863	8
1858	6.41739	138.667	46.566	42.459	3							1858	20.0087	96	46.5002	91.826	8
1859	7.18261	138.667	46.6965	41.833	3							1859	23.5565	96	46.6336	91.209	8
1860	7.85217	138.667	46.8151	41.071	3							1860	29.1913	96	46.8971	89.952	8
1861	9.1913	138.667	47.049	39.996	3							1861	55.8783	96	48.0735	85.118	8
1862	10.0522	138.667	47.1836	39.325	3							1862	1.04348	106.667	45.6565	97.631	8
1863	16.087	138.667	48.1769	34.831	3							1863	1.13913	106.667	45.6491	97.708	8
1864	16.087	138.667	48.1668	34.746	3							1864	1.43478	106.667	45.7011	97.24	8
1865	16.3739	138.667	48.2078	34.617	3							1865	2.71304	106.667	45.7587	96.754	8
1866	22.0435	138.667	49.1648	31.19	3							1866	4.14783	106.667	45.8625	95.944	8
1867	25.2087	138.667	49.6937	29.606	3							1867	5.73913	106.667	45.9848	95.074	8
1868	0.504348	149.333	45.6328	48.895	3							1868	6.49565	106.667	46.0351	94.814	8
1869	0.591304	149.333	45.6514	48.703	3							1869	10.2261	106.667	46.2847	92.653	8
1870	0.773913	149.333	45.699	48.615	3							1870	11.4783	106.667	46.4164	91.93	8
1871	0.956522	149.333	45.7307	48.338	3							1871	13.3826	106.667	46.5635	90.916	8
1872	1.05217	149.333	45.7418	48.154	3							1872	13.5652	106.667	46.5471	91.183	8
1873	1.09565	149.333	45.77	47.811	3							1873	20.0087	106.667	47.0664	88.455	8
1874	1.2087	149.333	45.8037	47.754	3							1874	23.5565	106.667	47.3739	86.258	8
1875	1.6	149.333	45.8595	47.172	3							1875	29.1913	106.667	47.7667	84.197	8
1876	1.61739	149.333	45.8595	47.261	3							1876	55.8783	106.667	49.8268	76.579	8
1877	1.61739	149.333	45.8461	47.31	3							1877	1.04348	117.333	45.6463	97.707	8
1878	1.67826	149.333	45.8463	47.216	3							1878	1.13913	117.333	45.6427	97.625	8
1879	2.0087	149.333	45.9058	46.845	3							1879	1.43478	117.333	45.6531	97.629	8
1880	2.06957	149.333	45.9236	46.793	3							1880	2.71304	117.333	45.8104	96.3	8
1881	2.62609	149.333	46.0369	45.917	3							1881	4.14783	117.333	45.98	95.378	8
1882	2.94783	149.333	46.1263	45.408	3							1882	5.73913	117.333	46.1216	94.363	8
1883	3.01739	149.333	46.1018	45.468	3							1883	6.49565	117.333	46.217	93.665	8
1884	3.94783	149.333	46.2742	44.239	3							1884	10.2261	117.333	46.5811	91.075	8
1885	4.34783	149.333	46.358	43.815	3							1885	11.4783	117.333	46.7323	89.92	8
1886	4.46087	149.333	46.3636	43.719	3							1886	13.3826	117.333	46.9372	88.327	8
1887	4.48696	149.333	46.3686	43.661	3							1887	13.5652	117.333	46.9273	88.431	8
1888	4.52174	149.333	46.3836	43.611	3							1888	20.0087	117.333	47.6107	84.09	8
1889	4.65217	149.333	46.4129	43.502	3							1889	23.5565	117.333	48.0211	81.906	8
1890	5.52174	149.333	46.5981	42.543	3							1890	29.1913	117.333	48.6123	79.156	8
1891	6.2	149.333	46.7306	41.732	3							1891	55.8783	117.333	51.4346	68.731	8
1892	6.41739	149.333	46.7773	41.245	3							1892	1.04348	128	45.6474	97.424	8
1893	7.18261	149.333	46.9411	40.161	3							1893	1.13913	128	45.6635	97.43	8
1894	7.85217	149.333	47.0709	39.292	3							1894	1.43478	128	45.6865	97.069	8
1895	9.1913	149.333	47.3429	37.958	3							1895	2.71304	128	45.8838	95.921	8
1896	10.0522	149.333	47.5068	37.184	3							1896	4.14783	128	46.0476	94.401	8
1897	16.087	149.333	48.703	32.161	3							1897	5.73913	128	46.2859	92.562	8
1898	16.087	149.333	48.7017	32.076	3							1898	6.49565	128	46.4061	92.152	8
1899	16.3739	149.333	48.7672	31.908	3							1899	10.2261	128	46.9078	88.345	8
1900	22.0435	149.333	49.8846	28.115	3							1900	11.4783	128	47.0593	87.243	8
1901	25.2087	149.333	50.5132	26.344	3							1901	13.3826	128	47.3302	85.357	8
1902	0.504348	160	45.6305	48.825	3							1902	13.5652	128	47.368	85.455	8
1903	0.591304	160	45.6522	48.604	3							1903	20.0087	128	48.2364	79.936	8
1904	0.773913	160	45.6904	48.319	3							1904	23.5565	128	48.7472	77.251	8
1905	0.956522	160	45.719	48.113	3							1905	29.1913	128	49.5111	73.793	8
1906	1.05217	160	45.7424	47.892	3							1906	55.8783	128	53.1461	61.292	8
1907	1.09565	160	45.7671	47.655	3							1907	1.04348	138.667	45.7113	97.145	8
1908	1.2087	160	45.792	47.394	3							1908	1.13913	138.667	45.7418	96.647	8
1909	1.6	160	45.8798	46.717	3							1909	1.43478	138.667	45.7591	96.588	8
1910	1.61739	160	45.8897	46.87	3							1910	2.71304	138.667	45.9687	95.075	8
1911	1.61739	160	45.8865	46.849	3							1911	4.14783	138.667	46.192	93.486	8
1912	1.67826	160	45.8913	46.862	3							1912	5.73913	138.667	46.4391	91.493	8
1913	2.0087	160	45.9679	46.389	3							1913	6.49565	138.667	46.5715	90.468	8
1914	2.06957	160	45.972	46.208	3							1914	10.2261	138.667	47.1977	85.969	8
1915	2.62609	160	46.0992	45.392	3							1915	11.4783	138.667	47.4208	84.674	8
1916	2.94783	160	46.2042	44.945	3							1916	13.3826	138.667	47.7499	82.396	8
1917	3.01739	160	46.2131	44.856	3							1917	13.5652	138.667	47.7913	82.475	8
1918	3.94783	160	46.4353	43.211	3							1918	20.0087	138.667	48.8748	75.843	8
1919	4.34783	160	46.5132	42.843	3							1919	23.5565	138.667	49.4402	72.836	8
1920	4.46087	160	46.5406	42.73	3							1920	29.1913	138.667	50.4057	68.722	8
1921	4.48696	160	46.5426	42.82	3							1921	55.8783	138.667	54.8256	53.513	8
1922	4.52174	160	46.5488	42.493	3							1922	1.04348	149.333	45.7335	96.69	8
1923	4.65217	160	46.5613	42.282	3							1923	1.13913	149.333	45.7437	96.901	8
1924	5.52174	160	46.7511	41.358	3							1924	1.43478	149.333	45.7981	96.485	8
1925	6.2	160	46.8972	40.407	3							1925	2.71304	149.333	46.0592	94.558	8
1926	6.41739	160	46.9486	40.103	3							1926	4.14783	149.333	46.3557	92.585	8
1927	7.18261	160	47.1194	39.063	3							1927	5.73913	149.333	46.6537	90.295	8
1928	7.85217	160	47.2785	38.28	3							1928	6.49565	149.333	46.8051	89.028	8
1929	9.1913	160	47.5901	36.422	3							1929	10.2261	149.333	47.5521	83.762	8
1930	10.0522	160	47.7846	35.536	3							1930	11.4783	149.333	47.7909	82.24	8
1931	16.087	160	49.1581	29.678	3							1931	13.3826	149.333	48.1836	79.563	8
1932	16.087	160	49.1702	29.613	3							1932	13.5652	149.333	48.2186	79.391	8
1933	16.3739	160	49.2378	29.338	3							1933	20.0087	149.333	49.4817	71.981	8
1934	22.0435	160	50.5216	25.306	3							1934	23.5565	149.333	50.188	68.456	8
1935	25.2087	160	51.2529	23.404	3							1935	29.1913	149.333	51.2954	63.387	8
1936	0.156522	0	45.4983	39.351	4							1936	55.8783	149.333	56.5242	46.885	8
1937	0.382609	0	45.4208	39.773	4							1937	1.04348	160	45.7239	96.969	8
1938	0.565217	0	45.404	40.042	4							1938	1.13913	160	45.7541	96.813	8
1939	0.66087	0	45.3767	39.979	4							1939	1.43478	160	45.8377	96.346	8
1940	0.73913	0	45.3665	40.151	4							1940	2.71304	160	46.1234	94.097	8
1941	0.73913	0	45.3505	40.277	4							1941	4.14783	160	46.4682	91.548	8
1942	0.73913	0	45.3653	40.153	4							1942	5.73913	160	46.8265	89.145	8
1943	0.73913	0	45.3654	40.118	4							1943	6.49565	160	47.0338	87.479	8
1944	0.956522	0	45.3238	40.379	4							1944	10.2261	160	47.8552	81.485	8
1945	1.23478	0	45.2667	40.821	4							1945	11.4783	160	48.1111	79.862	8
1946	1.38261	0	45.2114	40.968	4							1946	13.3826	160	48.5137	77.167	8
1947	1.67826	0	45.1404	41.467	4							1947	13.5652	160	48.5459	77.173	8
1948	1.67826	0	45.1361	41.577	4							1948	20.0087	160	50.0085	68.844	8
1949	1.76522	0	45.1278	41.453	4							1949	23.5565	160	50.8101	64.939	8
1950	1.76522	0	45.1142	41.581	4							1950	29.1913	160	52.1413	58.766	8
1951	2.16522	0	45.0259	42.108	4							1951	55.8783	160	58.2088	40.22	8
1952	2.63478	0	44.9029	42.867	4							1952	1.58261	0	45.185	120.72	9
1953	2.94783	0	44.8501	43.393	4							1953	3.8087	0	44.6478	125.088	9
1954	2.94783	0	44.8373	43.407	4							1954	5.73913	0	44.1994	128.196	9
1955	3.01739	0	44.8336	43.566	4							1955	7.90435	0	43.6946	131.949	9
1956	3.48696	0	44.7418	44.228	4							1956	11.4522	0	42.9036	137.721	9
1957	3.75652	0	44.6966	44.57	4							1957	13.4609	0	42.4527	140.867	9
1958	3.75652	0	44.6683	44.748	4							1958	13.4609	0	42.466	141.183	9
1959	3.81739	0	44.6465	44.694	4							1959	17.8435	0	41.4494	147.806	9
1960	3.94783	0	44.6132	44.917	4							1960	21.5478	0	40.6354	153.087	9
1961	4.81739	0	44.418	46.181	4							1961	27.5739	0	39.2021	161.836	9
1962	6.41739	0	44.0635	48.388	4							1962	75.6261	0	28.314	212.707	9
1963	6.66957	0	43.9839	48.629	4							1963	1.58261	10.6667	45.1876	120.499	9
1964	7.18261	0	43.874	49.224	4							1964	3.8087	10.6667	44.8398	123.339	9
1965	7.18261	0	43.8638	49.574	4							1965	5.73913	10.6667	44.481	126.176	9
1966	7.73913	0	43.753	50.1	4							1966	7.90435	10.6667	44.0167	129.515	9
1967	7.73913	0	43.7456	50.241	4							1967	11.4522	10.6667	43.3516	134.314	9
1968	8.95652	0	43.4667	51.33	4							1968	13.4609	10.6667	42.9002	137.877	9
1969	8.95652	0	43.4777	51.583	4							1969	13.4609	10.6667	42.8837	137.906	9
1970	9.1913	0	43.4172	51.825	4							1970	17.8435	10.6667	42.0545	143.603	9
1971	10.0522	0	43.2349	52.843	4							1971	21.5478	10.6667	41.3265	148.174	9
1972	10.0522	0	43.2331	52.869	4							1972	27.5739	10.6667	40.0875	155.559	9
1973	16.087	0	41.8848	59.287	4							1973	75.6261	10.6667	30.6132	199.723	9
1974	16.087	0	41.8833	59.338	4							1974	1.58261	21.3333	45.2847	120.009	9
1975	25.2087	0	39.7887	67.973	4							1975	3.8087	21.3333	44.8686	123.01	9
1976	0.156522	10.6667	45.4853	39.102	4							1976	5.73913	21.3333	44.5385	125.554	9
1977	0.382609	10.6667	45.4427	39.43	4							1977	7.90435	21.3333	44.1791	128.332	9
1978	0.565217	10.6667	45.4084	39.668	4							1978	11.4522	21.3333	43.5687	132.759	9
1979	0.66087	10.6667	45.377	39.716	4							1979	13.4609	21.3333	43.2191	135.269	9
1980	0.73913	10.6667	45.3735	39.764	4							1980	13.4609	21.3333	43.2848	134.839	9
1981	0.73913	10.6667	45.3875	39.614	4							1981	17.8435	21.3333	42.5325	139.849	9
1982	0.73913	10.6667	45.3923	39.574	4							1982	21.5478	21.3333	41.9136	143.723	9
1983	0.73913	10.6667	45.3997	39.557	4							1983	27.5739	21.3333	40.8988	150.283	9
1984	0.956522	10.6667	45.3449	39.716	4							1984	75.6261	21.3333	32.8706	187.218	9
1985	1.23478	10.6667	45.281	40.202	4							1985	1.58261	32	45.2829	119.829	9
1986	1.38261	10.6667	45.243	40.566	4							1986	3.8087	32	45.0008	122.35	9
1987	1.67826	10.6667	45.1851	41.05	4							1987	5.73913	32	44.7695	124.245	9
1988	1.67826	10.6667	45.2095	41.04	4							1988	7.90435	32	44.487	126.164	9
1989	1.76522	10.6667	45.1891	41.165	4							1989	11.4522	32	43.9962	129.72	9
1990	1.76522	10.6667	45.1929	40.918	4							1990	13.4609	32	43.7014	131.766	9
1991	2.16522	10.6667	45.1047	41.406	4							1991	13.4609	32	43.7195	131.687	9
1992	2.63478	10.6667	44.9928	42.041	4							1992	17.8435	32	43.1038	136.018	9
1993	2.94783	10.6667	44.9186	42.683	4							1993	21.5478	32	42.6271	139.022	9
1994	2.94783	10.6667	44.9387	42.662	4							1994	27.5739	32	41.7475	144.363	9
1995	3.01739	10.6667	44.9086	42.74	4							1995	75.6261	32	35.2012	174.028	9
1996	3.48696	10.6667	44.8342	43.252	4							1996	1.58261	42.6667	45.348	119.526	9
[truncated: 5,011 more rows]

## Sheet: Fig 5 supplement 2
Fig 5 supplement 2 dynamic clamp experiments
	vary 2 large (30 nS)		vary 20 medium (10 nS)		vary 16 small (3 nS)			CbN firing rate (spikes/s)	input firing rate of 2 large inputs (30 nS)						CbN firing rate (spikes/s)	input firing rate of 10 medium inputs (10 nS)						CbN firing rate (spikes/s)	input firing rate of 16 small input (3 nS)
input firing rate (spikes/s)	conductance mean (nS)	conductance CV	conductance mean (nS)	conductance CV	conductance mean (nS)	conductance CV		cell	0	40	80	120	160		cell	0	40	80	120	160		cell	0	40	80	120	160
0	33.7592	0.286521	24.5308	0.509081	36.4149	0.414236		1	112.875	84.375	54.625	24.125	7		1	185.375	109	47.625	6.625	0.5		1	105.5	72	45.75	20.75	5.625
40	40.6356	0.336032	36.2248	0.40043	42.2407	0.36261		2	109.25	70.125	39.5	15.875	5.5		2	222.75	110.75	36.25	3.625	0.5		2	111.375	69.25	36.875	16.875	4.125
80	47.4547	0.324703	47.4547	0.324703	47.4547	0.324703		3	107.875	82.5	59.375	31.125	11.5		3	182.375	107.375	52.875	10.25	0.625		3	104.625	76.25	53	26	10.625
120	54.1078	0.30584	58.6626	0.270705	53.0994	0.292644		4	114.125	89.25	62.625	36.875	15.75		4	193.25	119.5	59.875	15.125	1.625		4	118.875	84.375	60.125	32.25	14.5
160	61.1772	0.274551	70.3888	0.231836	58.5948	0.268245		5	76.25	55.375	35	17.375	6.375		5	161.875	88	37.125	5.375	0.625		5	88.75	59.125	39.125	16.375	6
								6	138.333	111.833	84	50.6667	24.8333		6	224.833	139.667	76.6667	25.1667	4		6	139.833	102	76.1667	43	22
								7	126	95.25	65.375	36.875	13.875		7	190	119.125	64.75	15.375	1.25		7	113.5	86.375	66.875	32.125	14.125
								8	105.875	77.375	50.75	23.75	6.625		8	166.25	100.25	46.125	4	0.5		8	99.125	67.5	42.5	18.375	5.375
								9	107.5	84.5	64.5	29.75	11.125		9	188.625	112.875	51.875	9.25	0.625		9	113.875	70.5	46.125	24.25	8.125
								mean	110.898	83.3981	57.3056	29.6019	11.3981		mean	190.593	111.838	52.5741	10.5324	1.13889		mean	110.606	76.375	51.838	25.5556	10.0556
								sem	5.58297	5.24933	4.89726	3.64011	2.06764		sem	7.19744	4.74196	4.33625	2.33536	0.380996		sem	4.73405	4.25148	4.45725	2.95445	1.95857
