# Supplementary material for: Implications of variable synaptic weights for rate and temporal coding of cerebellar outputs
Source: eLife. 2024 Jan 19;13:e89095. doi: 10.7554/eLife.89095 (PMC10798666; doi:10.7554/eLife.89095)
Supplement: Figure 6—source data 1. [file elife-89095-fig6-data1.xlsx]

## Sheet: Fig 6a-f
Fig 6a-f synchrony
	uniform (40 x 5 nS)		all sml		all small (3 nS)		all medium (10 nS)			CbN firing rate (spikes/s)	uniform (40 x 5 nS)						CbN firing rate (spikes/s)	all sml				CbN firing rate (spikes/s)	all small					all medium
synchrony %	synchronized amplitude (nS)	conductance CV	synchronized amplitude (nS)	conductance CV	synchronized amplitude (nS)	conductance CV	synchronized amplitude (nS)	conductance CV		cell	0% synchrony	25% synchrony	norm	50% synchrony	norm		cell	0% synchrony	50% synchrony	norm		cell	0% synchrony	25% synchrony	norm	50% synchrony	norm	0% synchrony	25% synchrony	norm	50% synchrony	norm
0	0	0.2003	0	0.34071	0	0.34071	0	0.34071		1	44	58.5	1.32955	104.5	2.375		1	50.125	106.25	2.1197		1	57.625	56.125	0.97397	61.625	1.06941	53.625	57	1.06294	66	1.23077
25	50	0.3562			12	0.34618	24	0.3552		2	23.625	42.75	1.80952	92	3.89418		2	40.0833	74.75	1.86486		2	48.5	45.1667	0.931272	50	1.03093	38.5	41.8333	1.08658	54.1667	1.40693
50	100	0.63873	102	0.66826	24	0.36875	48	0.42326		3	36.75	55.75	1.51701	93.875	2.55442		3	29.4609	78.6406	2.66932		3	53.625	50.125	0.934732	53.125	0.990676	41.875	45.75	1.09254	55.125	1.31642
										4	25.6667	45	1.75325	91.5	3.56494		4	29.1786	65.7679	2.25398		4	43	41.875	0.973837	45.375	1.05523	37.25	41.5	1.11409	48.875	1.31208
										5	26.125	43.75	1.67464	95.75	3.66507		5	47.6875	90.3125	1.89384		5	64.125	61	0.951267	62.75	0.978558	53.25	54.625	1.02582	60.5	1.13615
										6	23.125	46.125	1.99459	97.625	4.22162		6	51.15	102.188	1.9978		6	49.375	42.625	0.863291	49.875	1.01013	40	43.625	1.09062	53.25	1.33125
										7	23.5	48.125	2.04787	89.5	3.80851		7	51.3229	106.854	2.082
										8	26.5	41.9167	1.58176	70.9167	2.6761		8	48.9167	102.817	2.10187		mean	52.7083	49.4861	0.938061	53.7917	1.02249	44.0833	47.3889	1.07877	56.3194	1.28893
										9	10.3438	25.3516	2.45091	64.8047	6.26511							sem	3.04646	3.16604	0.0167247	2.84379	0.0146517	3.02484	2.75155	0.0125074	2.46369	0.0381794
										10	13.0625	29.7321	2.27614	61.2232	4.68694		mean	43.4906	90.9474	2.12292
										11	28	46.0625	1.64509	83.3125	2.97545		sem	3.33905	5.67362	0.0898988
										12	20.6	43.4	2.1068	90.725	4.40413
										13	22.0729	46.0208	2.08495	95.75	4.3379
										14	28.1333	54.4833	1.93661	105.35	3.74467
										mean	25.1074	44.7834	1.87205	88.3451	3.79814
										sem	2.24168	2.38833	0.0832722	3.65071	0.270389

## Sheet: Fig 6g-j
Fig 6g-j simulation synchrony
uniform 40 x 5 nS						variable size input
synchrony %	synchronized amplitude (nS)	conductance CV	CbN firing rate (spikes/s)	norm		synchrony %	synchronized amplitude (nS)	conductance CV	CbN firing rate (spikes/s)	norm	distribution
0	0	0.19719	25.75	1		89.4737	194.974	1.20836	140	2.40964	8
2.5	5	0.197748	25.41	0.986796		80.9524	155.235	0.991948	126.8	2.2724	2
5	10	0.200737	26.27	1.02019		65.5172	147.148	0.917274	119.1	2.23872	5
7.5	15	0.210782	29.06	1.12854		43.75	71.3913	0.587864	80	1.10957	3
10	20	0.224166	31.81	1.23534		58.6207	123.148	0.77951	106.5	2.00188	5
12.5	25	0.241711	34.71	1.34796		65	100.713	0.711821	95.7	1.54604	4
15	30	0.261294	38.77	1.50563		82.6087	176.957	1.09847	131.1	2.4368	6
17.5	35	0.28277	42.69	1.65786		81.25	170.383	1.04782	126.1	1.74896	3
20	40	0.30461	46.16	1.79262		70	132.052	0.874626	112	1.80937	4
22.5	45	0.33036	51.4	1.99612		64.7059	91.5652	0.667953	93.7	1.44599	7
25	50	0.354063	54.45	2.11456		48.2759	89.4261	0.614755	87.7	1.6485	5
27.5	55	0.380389	59.73	2.31961		88.2353	177.774	1.12123	134.2	2.07099	7
30	60	0.407877	64	2.48544		10	3.3913	0.416711	64.7	1.04523	4
32.5	65	0.434502	66.86	2.5965		17.6471	40.8696	0.463656	69	1.06481	7
35	70	0.463363	71.78	2.78757		13.0435	24.8174	0.358367	54.7	1.01673	6
37.5	75	0.49152	76.06	2.95379		41.1765	102.817	0.687482	97	1.49691	7
40	80	0.521227	79.8	3.09903		68.4211	98.713	0.706352	97.4	1.60992	9
42.5	85	0.549468	83.85	3.25631		23.5294	95.8609	0.646829	92.9	1.43364	7
45	90	0.578839	87.04	3.38019		15.7895	54.713	0.461231	69.7	1.19966	8
47.5	95	0.609305	91	3.53398		21.0526	28.2261	0.411703	62.3	1.07229	8
50	100	0.636146	93.48	3.63029		10.5263	26.2609	0.426936	66	1.09091	9
52.5	105	0.667592	96.93	3.76427		47.3684	105.026	0.679654	94.1	1.55537	9
55	110	0.69725	100.11	3.88777		28.5714	69.9826	0.496095	73.7	1.32079	2
57.5	115	0.725357	102.06	3.9635		37.931	87.4087	0.586716	85.6	1.60902	5
60	120	0.75262	104.82	4.07068		51.7241	91.3913	0.641679	92.7	1.74248	5
62.5	125	0.787198	109.14	4.23845		8.69565	3.94783	0.346827	53.1	0.986989	6
65	130	0.817332	111.54	4.33165		53.5714	101.113	0.669723	92.3	1.85341	1
67.5	135	0.846879	114.33	4.44		79.3103	153.548	0.969727	123.2	2.31579	5
70	140	0.874524	115.65	4.49126		40	139.826	0.887393	118.6	1.91599	4
72.5	145	0.908079	118.78	4.61282		65.5172	141.461	0.881504	115	2.16165	5
75	150	0.939162	121.5	4.71845		76.4706	122.748	0.824417	108.2	1.66975	7
77.5	155	0.969096	123.71	4.80427		68.4211	134.174	0.866225	112.5	1.93632	8
80	160	0.99918	126.13	4.89825		42.1053	71.8087	0.579059	84.8	1.40165	9
82.5	165	1.02971	128	4.97087		17.3913	52.713	0.444608	64.9	1.20632	6
85	170	1.06131	130.27	5.05903		33.3333	71.1652	0.55248	81.6	1.46237	2
87.5	175	1.0887	131.37	5.10175		65	135.27	0.878839	118.1	1.90792	4
90	180	1.11773	133.23	5.17398		11.7647	25.513	0.425166	61	0.941358	7
92.5	185	1.15137	135.93	5.27883		10.7143	22.0174	0.326303	49.4	0.991968	1
95	190	1.18551	138.72	5.38718		63.1579	120	0.798443	103.9	1.7883	8
97.5	195	1.22256	140.85	5.4699		47.3684	139.774	0.884335	116.7	2.00861	8
						73.6842	166.643	1.04337	128.7	2.12727	9
						68.4211	135.235	0.859502	112.4	1.9346	8
						80	113.565	0.782251	102.3	1.65267	4
						15	23.4957	0.423339	62.5	1.00969	4
						21.0526	34.0522	0.439525	66.8	1.10413	9
						52.381	113.583	0.73629	102.1	1.82975	2
						31.5789	105.478	0.678506	93.6	1.54711	9
						78.9474	169.287	1.05788	128.6	2.21343	8
						43.75	29.8957	0.498055	72.8	1.00971	3
						14.2857	68.9391	0.481144	69.4	1.24373	2
						38.0952	65.0609	0.530926	81.4	1.45878	2
						70	119.896	0.812667	107.3	1.73344	4
						60	141.704	0.898995	118.2	1.90953	4
						31.0345	92.4696	0.602469	86.4	1.62406	5
						84.2105	154.296	0.986134	121.5	2.09122	8
						23.5294	75.1652	0.543693	77.8	1.20062	7
						39.2857	104.296	0.679961	96.3	1.93373	1
						70.5882	95.6348	0.68674	95.8	1.4784	7
						85	132.626	0.882202	110.6	1.78675	4
						62.069	106.713	0.716575	97.4	1.83083	5
						72.4138	139.635	0.881458	115.6	2.17293	5
						89.4737	176.365	1.11927	135.5	2.23967	9
						35	42.6087	0.477907	71.4	1.15347	4
						60	145.043	0.926412	121.3	1.95961	4
						75	143.2	0.90799	112.7	1.56311	3
						50	70.6435	0.569518	81.7	1.31987	4
						37.5	62.6957	0.52417	77.2	1.07074	3
						65	156.243	0.98831	127.5	2.05977	4
						75	158.017	0.994643	124	2.00323	4
						64.2857	133.496	0.855775	114.4	2.29719	1
						52.9412	78.6087	0.601485	85.2	1.31481	7
						82.7586	182.087	1.1401	137.1	2.57707	5
						20.6897	36.8696	0.382304	58	1.09023	5
						20.6897	32.6261	0.387617	59.6	1.1203	5
						42.8571	94.9913	0.627355	88.6	1.58781	2
						19.0476	22.487	0.396274	59.4	1.06452	2
						89.4737	180.47	1.12915	134.6	2.22479	9
						18.75	86.6087	0.606359	86.4	1.19834	3
						17.8571	28.0174	0.342293	50.1	1.00602	1
						76.1905	154.104	0.959254	121.1	2.17025	2
						63.1579	96.4696	0.695244	94.4	1.56033	9
						85.7143	173.443	1.10198	134.8	2.41577	2
						43.75	76.0522	0.583077	83.6	1.1595	3
						32.1429	64.2435	0.474313	71.6	1.43775	1
						68.4211	142.226	0.894523	113.5	1.87603	9
						78.9474	175.148	1.07857	130.5	2.24613	8
						63.1579	147.391	0.933775	123.4	2.03967	9
						38.0952	46.9913	0.462921	67.9	1.21685	2
						82.3529	165.061	1.0307	126	1.94444	7
						45	96.8174	0.683397	93.7	1.51373	4
						43.75	108.035	0.750545	100.8	1.39806	3
						25	21.2174	0.483643	71.8	0.995839	3
						65	135.113	0.857292	112.2	1.8126	4
						25	89.4609	0.640735	92.5	1.28294	3
						52.9412	64.6261	0.543318	76.9	1.18673	7
						50	104.104	0.75277	101.3	1.40499	3
						55	141.409	0.886314	114.2	1.84491	4
						53.5714	93.7739	0.643141	92	1.84739	1
						75	170.348	1.0539	125.6	2.02908	4
						47.3684	115.304	0.748074	103.4	1.77969	8
						37.5	75.4609	0.603014	85.7	1.18863	3
						14.2857	23.3565	0.339195	50.4	1.01205	1
						14.2857	32.5913	0.407052	60.4	1.08244	2
						60.7143	104.835	0.689761	94.4	1.89558	1
						14.2857	20.5565	0.334364	48.8	0.97992	1
						78.9474	115.687	0.798657	105.4	1.74215	9
						71.4286	149.809	0.934621	119.7	2.40361	1
						41.1765	53.6348	0.506628	75	1.15741	7
						25	86.7652	0.608489	85	1.17892	3
						52.9412	139.652	0.893728	117.3	1.81019	7
						65.5172	123.252	0.793038	107.3	2.01692	5
						47.8261	94.7652	0.643364	90.7	1.68587	6
						33.3333	73.0957	0.52217	75.8	1.35842	2
						75	173.617	1.08748	131.2	2.11955	4
						29.4118	20.3652	0.43152	64.4	0.993827	7
						62.5	137.165	0.890255	116.2	1.61165	3
						20.6897	32.487	0.380825	58.5	1.09962	5
						78.5714	174.417	1.10257	134.9	2.70884	1
						71.4286	148.435	0.941348	119.4	2.39759	1
						66.6667	88.8522	0.642693	89.5	1.60394	2
						67.8571	153.722	0.967417	124.3	2.49598	1
						23.8095	88.4174	0.588788	86.5	1.55018	2
						82.7586	171.461	1.0694	131.3	2.46805	5
						37.5	104.278	0.704527	95.6	1.32594	3
						28.5714	83.2	0.565829	82.4	1.65462	1
						21.7391	61.8435	0.48347	73.5	1.36617	6
						30	66.7652	0.555064	83.3	1.34572	4
						23.5294	41.913	0.470382	71	1.09568	7
						84.2105	165.009	1.05027	130.3	2.15372	9
						31.5789	48.4696	0.481286	70.5	1.16529	9
						57.8947	130.452	0.852733	114.9	1.97762	8
						21.0526	65.7043	0.503527	75	1.29088	8
						88.2353	141.061	0.934793	117.3	1.81019	7
						57.8947	135.965	0.86439	116	1.99656	8
						17.8571	26.0522	0.345832	53.5	1.0743	1
						89.2857	186.765	1.17086	137.9	2.76908	1
						42.8571	103.13	0.666797	92.2	1.85141	1
						79.3103	146.557	0.938334	121.6	2.28571	5
						84.2105	194.522	1.21387	139	2.39243	8
						36.8421	94.5913	0.648155	91.8	1.58003	8
						35.7143	86.0696	0.577594	82.2	1.6506	1
						10.5263	10.9391	0.389968	57.6	0.991394	8
						64.7059	173.652	1.09746	131.5	2.02932	7
						26.3158	39.6	0.456776	67.7	1.11901	9
						57.1429	90.2783	0.653831	92.1	1.65054	2
						80	162.435	1.013	123.5	1.99515	4
						15	45.113	0.475752	71.5	1.15509	4
						10.7143	8.31304	0.318202	48.4	0.971888	1
						18.75	9.7913	0.474031	70.5	0.977809	3
						10	20.7304	0.433257	65.9	1.06462	4
						31.25	25.0609	0.484515	71.1	0.98613	3
						38.0952	94.9565	0.628125	91.6	1.64158	2
						92.8571	196.661	1.23604	140.6	2.82329	1
						28.5714	79.7217	0.548135	79.4	1.42294	2
						30	50.1391	0.492865	74.9	1.21002	4
						71.4286	135.635	0.865084	111.8	2.24498	1
						35.2941	57.9826	0.537942	80.1	1.23611	7
						79.3103	166.417	1.04001	128.3	2.41165	5
						19.0476	40.887	0.43184	65.5	1.17384	2
						31.25	28.7304	0.49075	70.1	0.972261	3
						31.25	42.2783	0.501156	76.5	1.06103	3
						23.5294	30.9217	0.453339	66.7	1.02932	7
						50	116.017	0.76247	101.1	1.40222	3
						21.4286	31.6522	0.35713	56.2	1.12851	1
						34.4828	60.6957	0.487852	74.4	1.3985	5
						67.8571	158.07	0.976529	122.1	2.45181	1
						79.3103	153.252	0.97544	118.6	2.22932	5
						8.69565	40.9217	0.370412	57.1	1.06134	6
						61.9048	140.783	0.878817	113.1	2.02688	2
						30.4348	39.7913	0.406741	63.7	1.18401	6
						56.25	79.8087	0.639573	87.6	1.21498	3
						11.7647	5.63478	0.425992	64.1	0.989198	7
						37.5	26.3652	0.49065	70.5	0.977809	3
						76.4706	181.548	1.1158	132.7	2.04784	7
						85.7143	184.765	1.12788	134	2.40143	2
						29.4118	44.9739	0.474211	71.1	1.09722	7
						15	25.5652	0.437319	65.8	1.063	4
						55.1724	88.5565	0.637805	92.9	1.74624	5
						27.5862	53.4609	0.455066	69.4	1.30451	5
						64.2857	129.443	0.825458	108.8	2.18474	1
						47.3684	71.1478	0.568916	81.9	1.40964	8
						64.7059	124.817	0.838243	109.7	1.6929	7
						68.75	130.157	0.853952	112.9	1.56588	3
						44.8276	82.6783	0.592519	85.8	1.61278	5
						34.7826	81.7739	0.584659	85.1	1.58178	6
						75	109.617	0.73268	101.6	2.04016	1
						65	145.461	0.920936	118	1.9063	4
						26.3158	22.0696	0.418007	60.7	1.00331	9
						48.2759	86.8174	0.610149	85.6	1.60902	5
						17.3913	21.1652	0.362696	56.9	1.05762	6
						73.6842	137.722	0.895047	115	1.97935	8
						76.4706	175.617	1.12437	136.6	2.10802	7
						57.1429	130.765	0.822691	109.7	2.20281	1
						6.89655	10.4696	0.337073	49.9	0.93797	5
						84.2105	158.035	1.02066	127.8	2.1124	9
						92.8571	181.183	1.11073	130.9	2.62851	1
						68.4211	156.73	0.987107	124.4	2.14114	8
						34.4828	51.4261	0.451692	68.7	1.29135	5
						47.619	107.93	0.695201	97	1.73835	2
						10	19.3913	0.417874	59.9	0.96769	4
						58.8235	113.461	0.743283	101.8	1.57099	7
						65	131.426	0.836862	110.6	1.78675	4
						78.9474	122.417	0.828639	106.6	1.76198	9
						56.5217	117.148	0.757036	104.5	1.94238	6
						12.5	23.3391	0.479872	72.2	1.00139	3
						38.0952	89.2	0.608075	90.2	1.61649	2
						31.0345	62.9043	0.491186	70.6	1.32707	5
						58.8235	131.27	0.845238	112.9	1.74228	7
						76.4706	166.296	1.06175	132.5	2.04475	7
						52.381	110.904	0.721527	98.7	1.76882	2
						56.25	99.2522	0.67806	93.7	1.29958	3
						63.1579	162.278	1.01386	126.4	2.17556	8
						35.7143	82.6261	0.565199	83	1.66667	1
						26.3158	36.313	0.454369	68.4	1.13058	9
						25	42.0522	0.498317	73.4	1.01803	3
						13.7931	9.51304	0.348879	52.2	0.981203	5
						80	106.296	0.756009	100.9	1.63005	4
						68.4211	143.461	0.90854	117.7	1.94545	9
						47.3684	77.4261	0.603803	87	1.43802	9
						57.1429	103.53	0.688152	95.1	1.90964	1
						81.25	190.783	1.19003	138.8	1.9251	3
						30.4348	46.8174	0.43185	67	1.24535	6
						70	122.435	0.811809	105	1.69628	4
						82.7586	188.974	1.18082	135.8	2.55263	5
						52.6316	62.0348	0.541693	79.9	1.32066	9
						41.1765	78.6957	0.608985	85.5	1.31944	7
						35.2941	75.9478	0.586755	83.4	1.28704	7
						41.1765	87.6348	0.612325	87.9	1.35648	7
						65.5172	160.417	1.00264	125.8	2.36466	5
						69.5652	139.496	0.88849	116.5	2.16543	6
						17.6471	8.83478	0.422703	63.6	0.981481	7
						27.5862	32.8	0.382468	58.6	1.1015	5
						28.5714	31.7391	0.418199	63.6	1.13978	2
						23.5294	42.9565	0.464054	69.7	1.07562	7
						65.2174	153.461	0.965702	122.3	2.27323	6
						52.6316	61.3391	0.545743	81.3	1.3438	9
						80.9524	142.73	0.936662	118.9	2.13082	2
						15.7895	63.513	0.477262	71.8	1.18678	9
						44.8276	80.2783	0.551385	83.1	1.56203	5
						75.8621	165.409	1.04016	127.2	2.39098	5
						37.5	54.5739	0.538785	78.2	1.0846	3
						43.75	68.7304	0.590848	83.8	1.16227	3
						33.3333	63.687	0.519748	76.4	1.36918	2
						50	122.4	0.794715	105	1.45631	3
						12.5	5.98261	0.476163	70.1	0.972261	3
						46.4286	92.3826	0.619025	90	1.80723	1
						85.7143	155.026	0.972442	121.7	2.44378	1
						19.0476	63.0435	0.468009	71.6	1.28315	2
						36.8421	64.7304	0.530411	79.2	1.36317	8
						71.4286	139.739	0.897713	117.8	2.11111	2
						30	46.4	0.489087	72.3	1.16801	4
						29.4118	47.7913	0.493414	75.4	1.16358	7
						8.69565	22.3304	0.359729	52.2	0.97026	6
						26.3158	99.7739	0.649418	94.4	1.56033	9
						61.9048	95.9652	0.683625	93.8	1.681	2
						10	12.2261	0.416516	62.8	1.01454	4
						76.4706	146.07	0.940167	115.6	1.78395	7
						82.6087	154.035	0.978549	125	2.32342	6
						37.5	90.487	0.627525	89.7	1.24411	3
						81.25	161.965	1.03223	126.1	1.74896	3
						6.89655	5.84348	0.342456	54.4	1.02256	5
						11.7647	36.9217	0.44799	65.9	1.01698	7
						82.3529	165.739	1.03629	125.5	1.93673	7
						10.5263	30.0696	0.43624	64.8	1.07107	9
						10.5263	41.3739	0.413959	65.1	1.12048	8
						11.7647	54.1913	0.453889	69.2	1.0679	7
						17.2414	65.4783	0.469031	71.8	1.34962	5
						31.5789	42.8348	0.470685	69.2	1.1438	9
						26.3158	37.6696	0.438963	65.1	1.12048	8
						67.8571	124.765	0.784982	104.9	2.10643	1
						56.25	44.6435	0.531758	76.3	1.05825	3
						76.4706	167.53	1.02775	123	1.89815	7
						68.9655	150.07	0.945048	121.2	2.2782	5
						78.5714	139.565	0.890567	113.7	2.28313	1
						91.3043	188.017	1.16625	135.7	2.5223	6
						20	41.8609	0.472714	72.4	1.16963	4
						17.3913	29.8957	0.367877	56.8	1.05576	6
						58.8235	123.391	0.823955	107.9	1.66512	7
						85.7143	176.991	1.11184	132.6	2.66265	1
						31.5789	89.3913	0.60526	88.3	1.4595	9
						13.7931	17.113	0.344917	52.7	0.990602	5
						64.2857	103.113	0.688446	97.3	1.95382	1
						17.8571	57.9652	0.434177	67	1.34538	1
						12.5	14.9391	0.474634	70.4	0.976422	3
						6.89655	5.44348	0.340845	53	0.996241	5
						24.1379	42.6609	0.420863	62.4	1.17293	5
						75	172.33	1.06896	130.2	1.80583	3
						6.89655	7.7913	0.346128	53.6	1.00752	5
						56.5217	112.296	0.729623	98.8	1.83643	6
						78.5714	163.391	1.02628	128.3	2.57631	1
						50	102.47	0.706073	95.1	1.319	3
						57.1429	127.426	0.822369	111.3	1.99462	2
						52.9412	61.4435	0.543238	77.6	1.19753	7
						40	136.539	0.861989	111.7	1.80452	4
						28.5714	50.887	0.470873	72.8	1.30466	2
						46.4286	131.809	0.833745	113.2	2.27309	1
						35.2941	43.113	0.47515	67.9	1.04784	7
						75	154.783	0.97495	123.9	2.48795	1
						43.4783	82.5913	0.593399	86.6	1.60967	6
						60.7143	114.887	0.741041	99.9	2.00602	1
						78.5714	175.2	1.10553	133.6	2.68273	1
						18.75	67.9826	0.574507	82	1.13731	3
						52.9412	116.104	0.758318	101	1.55864	7
						63.1579	138.417	0.878675	115.4	1.90744	9
						11.7647	31.0609	0.439367	66.7	1.02932	7
						47.619	99.687	0.693227	97.3	1.74373	2
						26.087	56.1913	0.456969	69.3	1.2881	6
						69.5652	120.87	0.785754	104	1.93309	6
						65.5172	117.878	0.77319	103.9	1.95301	5
						57.8947	111.096	0.764455	103	1.70248	9
						91.3043	190.122	1.17903	137.5	2.55576	6
						47.0588	60.313	0.539243	77.2	1.19136	7
						85	125.635	0.837107	108.1	1.74637	4
						80	174.574	1.09832	132.9	2.14701	4
						71.4286	145.948	0.919385	118.5	2.37952	1
						82.7586	172.887	1.08325	130.5	2.45301	5
						81.25	166.696	1.05129	128.3	1.77947	3
						65	109.687	0.755198	100	1.61551	4
						52.6316	119.53	0.775963	107.9	1.78347	9
						25	88.1565	0.613675	86	1.19279	3
						37.5	110.226	0.737427	101.6	1.40915	3
						42.1053	70.2957	0.571938	82.9	1.37025	9
						88.2353	163.513	1.03556	127	1.95988	7
						73.6842	102.835	0.726776	97.5	1.61157	9
						70	168.591	1.05493	131.3	2.12116	4
						88.2353	185.374	1.16399	138.5	2.13735	7
						89.4737	190.609	1.20029	140.4	2.32066	9
						60.8696	151.235	0.952724	124.1	2.30669	6
						63.1579	106.383	0.709668	97.7	1.68158	8
						35	50.8	0.504938	73.1	1.18094	4
						17.6471	28.1913	0.435826	63.7	0.983025	7
						42.1053	72.8	0.547958	82.3	1.41652	8
						6.89655	8.13913	0.339533	52.8	0.992481	5
						31.25	93.2	0.646709	90.9	1.26075	3
						72.4138	150.313	0.947359	121.9	2.29135	5
						12.5	52.3304	0.47641	72.5	1.00555	3
						43.75	107.148	0.741748	100.2	1.38974	3
						63.1579	120.974	0.812124	105	1.73554	9
						78.9474	162.417	1.02801	127.6	2.19621	8
						26.3158	46.1217	0.43986	67.7	1.16523	8
						80.9524	181.009	1.13341	134.1	2.40323	2
						85.7143	187.148	1.17898	138.7	2.48566	2
						18.75	85.2174	0.606514	88.6	1.22885	3
						10.5263	11.4609	0.412169	62.7	1.03636	9
						60.7143	110.035	0.714412	99.3	1.99398	1
						28.5714	92.7304	0.609512	91.7	1.64337	2
						92.8571	183.287	1.1522	136.2	2.73494	1
						26.3158	58.6783	0.52084	75.1	1.24132	9
						73.6842	119.583	0.81811	107.3	1.77355	9
						26.3158	49.4435	0.474936	70.5	1.21343	8
						45	63.4435	0.547496	81.2	1.31179	4
						58.8235	131.461	0.851663	111.7	1.72377	7
						50	89.7217	0.60593	87.9	1.76506	1
						10	3.3913	0.415216	62.1	1.00323	4
						17.2414	29.0261	0.375689	58.1	1.09211	5
						71.4286	131.965	0.83621	109.7	2.20281	1
						11.7647	5.63478	0.420398	62.3	0.96142	7
						85.7143	141.913	0.922252	116.1	2.08065	2
						33.3333	66.5739	0.525995	77.9	1.39606	2
						85.7143	175.252	1.10407	134.3	2.69679	1
						56.5217	116.539	0.74683	102.9	1.91264	6
						8.69565	29.4261	0.37127	56.9	1.05762	6
						41.3793	70.4522	0.529403	78	1.46617	5
						31.5789	52.1217	0.494486	75.9	1.25455	9
						80.9524	179.53	1.11999	134.1	2.40323	2
						50	121.739	0.799492	105.9	1.46879	3
						23.5294	43.2696	0.481372	70.8	1.09259	7
						82.6087	178.4	1.09809	130	2.41636	6
						71.4286	156.139	0.977078	124.1	2.49197	1
						70.5882	139.67	0.911019	119.3	1.84105	7
						15.7895	35.3043	0.444425	67.3	1.1124	9
						60	145.53	0.914317	119.3	1.9273	4
						26.3158	50.8696	0.48056	72.5	1.19835	9
						47.0588	128.33	0.811804	105.6	1.62963	7
						18.75	68.0174	0.533706	76.2	1.05687	3
						19.0476	15.5652	0.388651	59.5	1.06631	2
						25	33.9652	0.358353	52.3	1.0502	1
						15.7895	60.6609	0.479621	71	1.22203	8
						10.5263	26.2609	0.42195	62.8	1.03802	9
						19.0476	32.6609	0.41275	60.5	1.08423	2
						64.7059	112.07	0.765492	103.8	1.60185	7
						14.2857	22.8522	0.333853	50.5	1.01406	1
						52.381	88.3652	0.624927	86.9	1.55735	2
						35.7143	65.687	0.4938	75.8	1.52209	1
						14.2857	38	0.368411	56.8	1.14056	1
						57.1429	118.33	0.763737	106.4	1.90681	2
						42.1053	115.548	0.748812	105.7	1.81928	8
						68.4211	156.713	0.990859	124.7	2.1463	8
						71.4286	160.348	0.984669	120.4	2.41767	1
						52.1739	121.896	0.77414	105.7	1.96468	6
						10.5263	5.63478	0.390901	61.1	1.05164	8
						64.7059	108.087	0.750276	100.6	1.55247	7
						41.3793	117.183	0.744508	102.6	1.92857	5
						55.1724	103.061	0.698722	96.9	1.82143	5
						46.4286	92.0348	0.615076	90.1	1.80924	1
						60	138.243	0.875882	114.4	1.84814	4
						21.0526	31.3217	0.439941	66.8	1.10413	9
						15.7895	31.4261	0.431631	65.1	1.07603	9
						20	36.5391	0.459654	69.5	1.12278	4
						41.1765	111.878	0.732083	100.1	1.54475	7
						20.6897	35.4087	0.383463	59.5	1.11842	5
						12.5	7.37391	0.466875	69.4	0.962552	3
						64.7059	108.87	0.755954	103.7	1.60031	7
						26.087	53.0435	0.457382	71.4	1.32714	6
						30.4348	62.4522	0.487204	71.6	1.33086	6
						64.7059	158.139	0.977878	120.3	1.85648	7
						41.1765	43.7913	0.480085	71.3	1.10031	7
						91.3043	173.722	1.10509	133.8	2.48699	6
						18.75	67.4087	0.539268	78.8	1.09293	3
						47.3684	83.8957	0.607983	88.5	1.52324	8
						71.4286	146.052	0.934799	120.2	2.15412	2
						53.5714	110.487	0.717298	100	2.00803	1
						47.3684	77.1304	0.5608	78.6	1.35284	8
						89.4737	190.052	1.20197	140.6	2.32397	9
						35.2941	30.4522	0.45493	66.2	1.0216	7
						35.2941	58.1217	0.526786	75.5	1.16512	7
						15.7895	52.9913	0.455655	69.4	1.19449	8
						57.8947	124.922	0.825226	109.9	1.89157	8
						42.1053	110.504	0.716276	99.4	1.64298	9
						29.4118	56.6435	0.522727	76.8	1.18519	7
						63.1579	122.4	0.830072	110	1.81818	9
						80	187.009	1.15963	136.2	2.20032	4
						17.3913	31.0435	0.374021	57.8	1.07435	6
						34.4828	93.5304	0.62394	91.2	1.71429	5
						90	178.991	1.12194	133.2	2.15186	4
						62.5	67.2348	0.595087	81.9	1.13592	3
						41.3793	69.2348	0.526612	80.1	1.50564	5
						25	57.5826	0.526203	78.8	1.27302	4
						70.5882	132.696	0.849355	111.7	1.72377	7
						68.4211	137.391	0.889759	114.3	1.9673	8
						42.1053	41.2174	0.450113	64.3	1.10671	8
						10.5263	6.13913	0.389052	58	0.998279	8
						31.25	88.7826	0.660595	93.3	1.29404	3
						8.69565	11.4609	0.350032	54.1	1.00558	6
						42.1053	51.9304	0.494833	73.7	1.21818	9
						50	94.8348	0.639872	91	1.47011	4
						75	149.096	0.952059	119.7	1.66019	3
						21.0526	27.113	0.432286	64.6	1.06777	9
						28.5714	51.913	0.425771	65.4	1.31325	1
						45	85.0435	0.641479	92.7	1.49758	4
						56.5217	101.965	0.685499	94.2	1.75093	6
						89.4737	189.27	1.17502	137.1	2.35972	8
						26.3158	59.5826	0.480067	71.8	1.2358	8
						13.7931	19.5826	0.352274	53.4	1.00376	5
						32.1429	75.2522	0.520222	78.1	1.56827	1
						47.8261	88.9043	0.627666	90.9	1.68959	6
						58.8235	140.417	0.892152	114.1	1.7608	7
						62.069	152.8	0.96062	122.8	2.30827	5
						50	94.3304	0.692322	92.4	1.28155	3
						43.75	168.957	1.06245	131.9	1.8294	3
						42.8571	69.8087	0.544867	81.7	1.46416	2
						89.4737	135.217	0.898934	114.2	1.8876	9
						76.4706	169.583	1.07044	132	2.03704	7
						31.5789	41.0435	0.467664	67.1	1.10909	9
						88.2353	188.139	1.16629	135.3	2.08796	7
						75	139.443	0.919782	112.7	1.82068	4
						30	52.6957	0.500766	74.8	1.2084	4
						6.89655	18.313	0.352091	54.1	1.01692	5
						68.9655	171.739	1.07713	130.8	2.45865	5
						78.9474	111.878	0.780044	102.6	1.69587	9
						79.3103	174.974	1.08667	132	2.4812	5
						73.913	145.27	0.932392	117.8	2.18959	6
						50	75.1304	0.596961	81.9	1.3231	4
						17.6471	28.9913	0.448141	67.7	1.04475	7
						78.2609	169.461	1.06912	131	2.43494	6
						25	62.2435	0.469227	72.1	1.44779	1
						17.8571	32.1565	0.353439	55	1.10442	1
						8.69565	31.4435	0.367608	55.7	1.03532	6
						20.6897	64.887	0.462493	70.3	1.32143	5
						11.7647	11.8609	0.433002	65.6	1.01235	7
						47.3684	119.078	0.75974	103.1	1.70413	9
						26.3158	45.4957	0.478344	69.4	1.14711	9
						20.6897	60.313	0.449466	67	1.2594	5
						17.3913	12.5043	0.347823	51.7	0.960967	6
						56.25	95.6	0.698396	93.4	1.29542	3
						72.4138	158.835	0.998936	124.7	2.34398	5
						55	143.774	0.913028	120.2	1.94184	4
						89.4737	178.73	1.12845	134.6	2.3167	8
						50	112.765	0.726956	100.8	2.0241	1
						23.8095	38.9913	0.424161	64.8	1.16129	2
						81.25	164.365	1.05233	128.8	1.78641	3
						58.8235	94.3304	0.683621	96.7	1.49228	7
						36.8421	93.913	0.627352	89.8	1.54561	8
						51.7241	92.6087	0.636367	91.9	1.72744	5
						46.4286	100.504	0.665519	94.4	1.89558	1
						47.619	111.252	0.72571	104.2	1.86738	2
						31.25	73.5304	0.571498	82.8	1.1484	3
						56.5217	91.913	0.637601	90.7	1.68587	6
						48.2759	97.8783	0.66473	93.9	1.76504	5
						85	177.078	1.11994	135.1	2.18255	4
						56.25	137.6	0.893774	115.1	1.59639	3
						42.8571	94.5913	0.620004	88	1.76707	1
						35.7143	71.687	0.508583	76.7	1.54016	1
						31.5789	65.0435	0.507366	75.2	1.29432	8
						10.5263	14.5043	0.407569	64.4	1.06446	9
						57.1429	77.0609	0.551077	79.2	1.59036	1
						64.2857	127.687	0.800803	105.9	2.12651	1
						47.3684	63.9826	0.537944	76.2	1.31153	8
						85	167.339	1.05801	130.9	2.1147	4
						62.5	124.452	0.83387	106.4	1.47573	3
						38.0952	71.8261	0.56046	81.6	1.46237	2
						28.5714	44.3652	0.399654	60.3	1.21084	1
						6.89655	41.3739	0.354473	51.7	0.971805	5
						17.8571	59.4957	0.443041	67.1	1.34739	1
						76.4706	118.835	0.809026	106.2	1.63889	7
						57.8947	95.0609	0.657041	89.8	1.54561	8
						27.5862	68.1739	0.514639	76.7	1.44173	5
						43.75	75.5652	0.605812	89	1.2344	3
						37.5	75.2348	0.606116	84.6	1.17337	3
						31.25	55.8609	0.547113	80.4	1.11512	3
						73.6842	163.548	1.02186	127.1	2.10083	9
						52.6316	131.6	0.840222	112.5	1.8595	9
						63.1579	122.643	0.78763	105.1	1.73719	9
						28.5714	43.5478	0.44539	66.4	1.18996	2
						56.25	75.7217	0.612283	87	1.20666	3
						70.5882	159.635	1.02585	127.5	1.96759	7
						89.4737	178.678	1.12042	133.1	2.29088	8
						68.75	124	0.843612	112.3	1.55756	3
						11.7647	17.4435	0.432103	63.7	0.983025	7
						11.7647	27.113	0.435965	65.3	1.00772	7
						6.89655	14.6957	0.333314	49.8	0.93609	5
						52.6316	146.07	0.925476	120	1.98347	9
						85	172.383	1.07432	129.5	2.09208	4
						89.6552	169.983	1.06846	130.5	2.45301	5
						88.2353	156.452	1.01478	127	1.95988	7
						70	146.122	0.92651	118.4	1.91276	4
						70.5882	129.861	0.832164	106.7	1.6466	7
						52.6316	96.4348	0.664653	92.8	1.59725	8
						45	75.0783	0.592645	84.4	1.36349	4
						70	142.157	0.902746	116.1	1.87561	4
						50	103.165	0.693337	97.1	1.56866	4
						24.1379	78.7826	0.535825	81.1	1.52444	5
						56.25	83.2696	0.648717	90.1	1.24965	3
						31.25	57.2348	0.545758	79.7	1.10541	3
						20	35.7565	0.456461	67.7	1.0937	4
						41.1765	121.965	0.789471	106.9	1.64969	7
						89.4737	181.983	1.14291	135.8	2.24463	9
						23.5294	36.1391	0.455268	67.6	1.04321	7
						20.6897	35.913	0.391984	59.4	1.11654	5
						42.8571	61.4957	0.475993	72.5	1.45582	1
						93.1034	190.417	1.19275	138.4	2.6015	5
						58.6207	144.017	0.900412	116.9	2.19737	5
						78.2609	152.296	0.962965	124.3	2.31041	6
						17.3913	28.9565	0.363594	54.2	1.00743	6
						10.5263	44.6087	0.423685	63.4	1.09122	8
						78.9474	184.226	1.15964	138.4	2.2876	9
						17.8571	36.9913	0.370233	55.3	1.11044	1
						82.6087	170.678	1.08369	133.6	2.48327	6
						12.5	22.5217	0.468627	69.4	0.962552	3
						50	82.7478	0.62476	88.5	1.42973	4
						50	60.1217	0.544256	81.1	1.31018	4
						45	137.687	0.873731	115	1.85784	4
						10.5263	18.1913	0.418443	64.2	1.06116	9
						58.6207	115.183	0.746302	105	1.97368	5
						41.3793	62.5391	0.500746	75.1	1.41165	5
						41.1765	96.8522	0.69546	95.4	1.47222	7
						38.0952	52.2087	0.490422	74.2	1.32975	2
						65	103.322	0.732069	98.7	1.59451	4
						18.75	38.2261	0.503857	75	1.04022	3
						31.25	83.5478	0.616891	86	1.19279	3
						78.9474	152.33	0.966968	120.6	2.07573	8
						43.4783	90.7478	0.60392	85.6	1.59108	6
						26.087	45.7043	0.428283	64.6	1.20074	6
						56.5217	135.026	0.865446	116	2.15613	6
						64.7059	144.504	0.906406	115.3	1.77932	7
						47.619	92.2783	0.651145	91.6	1.64158	2
						47.3684	92.5217	0.663918	91.6	1.51405	9
						91.3043	193.983	1.19597	137	2.54647	6
						68.9655	134.922	0.860925	110.9	2.08459	5
						21.7391	38.3478	0.395395	59.7	1.10967	6
						56.5217	137.252	0.882835	117.4	2.18216	6
						30	57.0783	0.525284	77.5	1.25202	4
						29.4118	57.4087	0.521467	78.5	1.21142	7
						25	98.0522	0.680648	95.6	1.32594	3
						70.5882	141.948	0.889027	113.3	1.74846	7
						17.6471	17.5826	0.428823	64.5	0.99537	7
						86.9565	187.67	1.12946	132.2	2.45725	6
						13.7931	31.7391	0.37633	57	1.07143	5
						35.7143	113.652	0.719985	100.5	2.01807	1
						23.5294	74.7304	0.544736	78.6	1.21296	7
						63.1579	155.809	0.983498	123.3	2.1222	8
						25	19.8087	0.334364	51	1.0241	1
						43.75	57.7565	0.543487	77.9	1.08044	3
						27.5862	49.3913	0.439859	66.8	1.25564	5
						10.3448	11.4783	0.345376	54	1.01504	5
						82.7586	170.817	1.0687	131.3	2.46805	5
						78.5714	145.27	0.920683	119.2	2.39357	1
						90	196.609	1.22543	139.7	2.25687	4
						6.89655	2.95652	0.339651	51.2	0.962406	5
						80	169.061	1.0466	125.3	2.02423	4
						31.0345	51.3913	0.439665	65.7	1.23496	5
						28.5714	31.2522	0.358193	51.3	1.03012	1
						9.52381	5.21739	0.382252	58.8	1.05376	2
						58.6207	149.096	0.932774	121	2.27444	5
						47.619	76.0348	0.585292	83.6	1.49821	2
						44.8276	102.591	0.667079	94.4	1.77444	5
						26.3158	40.5913	0.456524	68.1	1.12562	9
						62.5	171.13	1.04691	127	1.76144	3
						78.9474	157.061	0.969954	120.7	1.99504	9
						63.1579	144.852	0.915506	117	1.93388	9
						82.3529	142.087	0.9105	115.9	1.78858	7
						13.0435	10.4522	0.344335	51.5	0.957249	6
						75	173.983	1.10891	134.9	2.17932	4
						34.4828	79.2174	0.539093	77.8	1.46241	5
						26.3158	47.1652	0.475247	71.3	1.17851	9
						70.5882	114.748	0.777233	100.7	1.55401	7
						25	25.287	0.47818	70.4	0.976422	3
						58.8235	130.835	0.845289	113.2	1.74691	7
						82.1429	181.704	1.11927	133.3	2.67671	1
						84.2105	149.304	0.956328	121.8	2.09639	8
						75.8621	116.052	0.777018	105.1	1.97556	5
						47.0588	121.739	0.787158	106.2	1.63889	7
						31.5789	61.0435	0.486197	72.6	1.24957	8
						87.5	135.652	0.897993	115.3	1.59917	3
						39.1304	89.7565	0.605788	88.5	1.64498	6
						61.9048	158.522	0.993403	127.1	2.27778	2
						69.5652	162.557	1.02424	129.3	2.40335	6
						38.0952	46.487	0.468191	72.5	1.29928	2
						33.3333	48.713	0.466266	68.8	1.23297	2
						51.7241	57.513	0.473288	70.5	1.32519	5
						34.4828	59.4783	0.483623	75	1.40977	5
						10.3448	20.8348	0.351115	54.7	1.0282	5
						89.4737	153.826	0.982961	120.2	2.06885	8
						65	108.139	0.749665	100.3	1.62036	4
						65.2174	98.887	0.673126	92.3	1.71561	6
						31.0345	30.2261	0.379752	56.2	1.05639	5
						69.5652	151.6	0.951993	120.3	2.23606	6
						41.1765	48.2435	0.507028	75.5	1.16512	7
						32.1429	59.0087	0.452151	66.2	1.32932	1
						75.8621	171.548	1.06581	127.5	2.39662	5
						52.6316	56.1565	0.510576	76.4	1.31497	8
						67.8571	121.983	0.78311	108	2.16867	1
						31.5789	64.9391	0.518696	78.5	1.35112	8
						10.5263	59.3913	0.452291	68	1.12397	9
						42.8571	69.3565	0.545948	80.6	1.44444	2
						82.3529	149.27	0.988502	122.8	1.89506	7
						31.25	92	0.647464	89.4	1.23994	3
						35.2941	53.6174	0.502605	74.8	1.15432	7
						80.9524	168.8	1.0704	132	2.36559	2
						92.8571	190.191	1.18628	138.4	2.77912	1
						35	114.191	0.7433	103.8	1.6769	4
						82.7586	144.035	0.931638	114.5	2.15226	5
						35.2941	109.965	0.726343	101.7	1.56944	7
						29.4118	60.2435	0.522902	77.5	1.19599	7
						45	129.583	0.818721	109.2	1.76414	4
						81.25	163.183	1.02209	125.7	1.74341	3
						12.5	34.5913	0.472049	70.5	0.977809	3
						64.2857	139.304	0.880626	114.9	2.30723	1
						47.8261	123.009	0.78284	107.2	1.99257	6
						39.1304	67.1826	0.519014	79.1	1.47026	6
						92.8571	179.722	1.12558	134.1	2.69277	1
						75	185.739	1.16639	137.7	2.22456	4
						75	171.496	1.07595	130.7	2.11147	4
						42.8571	97.8609	0.648561	90.8	1.62724	2
						21.0526	15.7565	0.398706	60	1.0327	8
						58.8235	100	0.710997	97.8	1.50926	7
						12.5	22.0174	0.472058	70.1	0.972261	3
						15	25.6174	0.435092	65.4	1.05654	4
						75	131.635	0.877645	112.9	1.56588	3
						52.6316	99.0087	0.705148	97.3	1.60826	9
						15.7895	28.8696	0.433735	66	1.09091	9
						20	30.6435	0.443513	68.2	1.10178	4
						70.5882	158.904	0.996705	123.5	1.90586	7
						10.5263	4.78261	0.393665	62.3	1.07229	8
						60.8696	98.313	0.672747	93.8	1.74349	6
						36.8421	107.687	0.699536	99.4	1.64298	9
						25	72.8	0.511378	76.6	1.53815	1
						90.4762	171.322	1.07766	129.2	2.31541	2
						43.75	47.4609	0.535399	77	1.06796	3
						15.7895	19.3913	0.418544	64.5	1.06612	9
						93.1034	193.565	1.21267	139.1	2.61466	5
						70.5882	146.487	0.932381	121	1.86728	7
						15.7895	15.1826	0.399201	60.4	1.03959	8
						91.3043	197.443	1.21427	137.9	2.5632	6
						15	20.3478	0.428789	67.4	1.08885	4
						79.3103	183.078	1.14202	134.5	2.5282	5
						35	98.3478	0.65532	93.3	1.50727	4
						36.8421	77.3391	0.590205	84.8	1.45955	8
						75	161.235	1.02452	125.3	1.73786	3
						66.6667	102.574	0.710358	94.4	1.69176	2
						91.3043	185.409	1.16004	137.8	2.56134	6
						19.0476	21.287	0.39793	61.9	1.10932	2
						60	100.261	0.714922	98.5	1.59128	4
						20	17.0609	0.422711	61.4	0.991922	4
						57.1429	91.687	0.649572	92.4	1.65591	2
						65.2174	119.704	0.767688	105.2	1.95539	6
						75.8621	138.313	0.882314	117	2.19925	5
						28.5714	66.9391	0.495222	79.4	1.59438	1
						19.0476	34.8174	0.424134	66.1	1.18459	2
						27.5862	53.513	0.447294	66.6	1.25188	5
						30	57.7565	0.519724	75.6	1.22132	4
						47.3684	97.8783	0.70027	97.2	1.60661	9
						89.6552	174.661	1.09734	132.7	2.49436	5
						21.4286	78.9043	0.535958	80.7	1.62048	1
						87.5	164.591	1.04424	127.8	1.77254	3
						88.2353	172.713	1.09106	132.9	2.05093	7
						75	170.383	1.06273	129	2.08401	4
						42.8571	68.1913	0.497711	73.9	1.48394	1
						68.75	127.078	0.848485	109.2	1.51456	3
						75	155.183	0.987146	123.9	1.71845	3
						28.5714	63.687	0.512335	72.5	1.29928	2
						31.0345	74.2957	0.512081	77.2	1.45113	5
						84.2105	146.017	0.94403	120.4	2.07229	8
						90	167.722	1.07996	132.2	2.1357	4
						31.5789	58.9391	0.508811	74.7	1.28571	8
						14.2857	67.6522	0.480543	72.9	1.30645	2
						68.75	161.148	1.0224	128.3	1.77947	3
						42.1053	63.8261	0.545126	81.3	1.3438	9
						73.6842	93.6522	0.677146	95.3	1.64028	8
						35.2941	40.2609	0.462618	65.8	1.01543	7
						90	131.67	0.882036	112.3	1.81422	4
						62.5	155.704	1.00247	125.3	1.73786	3
						68.9655	122.974	0.789577	105.8	1.98872	5
						68.75	145.565	0.934746	118.8	1.64771	3
						70.5882	109.374	0.766048	105.3	1.625	7
						89.6552	146.4	0.955516	121.1	2.27632	5
						88.2353	173.496	1.07011	125.9	1.9429	7
						17.3913	50.2957	0.40677	60.6	1.12639	6
						31.0345	60	0.487175	75.2	1.41353	5
						34.7826	75.8957	0.547376	80.7	1.5	6
						82.6087	179.565	1.12211	133.6	2.48327	6
						67.8571	112.713	0.738902	102.8	2.06426	1
						42.1053	91.9826	0.638614	89.3	1.53701	8
						11.7647	43.5478	0.459678	69.9	1.0787	7
						28.5714	44.1043	0.393185	59	1.18474	1
						42.1053	53.5652	0.49785	74.1	1.22479	9
						31.5789	73.0087	0.578042	84.8	1.40165	9
						52.9412	117.13	0.763024	104.1	1.60648	7
						73.6842	148.991	0.942176	120.6	1.99339	9
						50	118.817	0.773515	103.6	1.67367	4
						79.3103	156.539	0.975885	122.6	2.30451	5
						21.0526	32.1565	0.435516	66.8	1.10413	9
						15.7895	20.6957	0.403123	60.1	1.03442	8
						30.4348	45.4087	0.422058	62.9	1.16914	6
						55	125.339	0.799353	105.1	1.6979	4
						53.5714	128.052	0.818411	110.8	2.2249	1
						15.7895	37.4957	0.40658	62.4	1.07401	8
						12.5	14.7478	0.472234	69.5	0.963939	3
						50	126.017	0.810631	110.2	1.78029	4
						11.7647	27.287	0.42942	63.4	0.978395	7
						9.52381	15.2522	0.383455	60.2	1.07885	2
						47.0588	109.322	0.717016	98.2	1.51543	7
						64.2857	135.061	0.855203	112.8	2.26506	1
						47.0588	126.174	0.812971	111.1	1.71451	7
						28.5714	65.6348	0.472672	69	1.38554	1
						90.4762	190.557	1.18512	138.9	2.48925	2
						31.5789	45.4087	0.485314	72.7	1.20165	9
						19.0476	55.1478	0.43126	65.9	1.181	2
						89.4737	189.148	1.17475	136.2	2.34423	8
						36.8421	109.061	0.711227	101.2	1.67273	9
						68.75	103.757	0.720294	97.8	1.35645	3
						52.9412	104.817	0.730431	96.5	1.4892	7
						44.8276	92.5043	0.619162	91.7	1.72368	5
						15	70.2435	0.504953	76.5	1.23586	4
						75	138.678	0.924162	116.6	1.88368	4
						31.25	57.0435	0.541683	78.2	1.0846	3
						25	25.7913	0.434091	65.4	1.05654	4
						80.9524	168.696	1.07481	133.6	2.39427	2
						68.4211	140.348	0.887495	116.8	1.93058	9
						90	131.67	0.88295	112.7	1.82068	4
						68.75	79.6696	0.651389	88.5	1.22746	3
						35	104.939	0.686949	96.3	1.55574	4
						21.0526	27.3043	0.429955	66.3	1.09587	9
						52.9412	89.3565	0.655512	93.2	1.43827	7
						34.7826	71.9652	0.51382	74.2	1.37918	6
						55	122	0.791563	108.1	1.74637	4
						39.2857	87.7739	0.594609	87.4	1.75502	1
						82.3529	169.965	1.03594	124	1.91358	7
						41.1765	144.209	0.90059	116.8	1.80247	7
						41.1765	63.6	0.540985	76.9	1.18673	7
						92.8571	176.591	1.0845	127.6	2.56225	1
						56.25	113.026	0.751744	101	1.40083	3
						67.8571	130.835	0.840196	113.8	2.28514	1
						57.1429	126.296	0.799477	109.3	2.19478	1
						15.7895	19.6696	0.422366	65	1.07438	9
						34.4828	88.1217	0.58621	86.5	1.62594	5
						62.5	145.217	0.929672	121.2	1.681	3
						52.6316	84.713	0.626395	89.6	1.48099	9
						84.2105	172.765	1.08081	130.5	2.15702	9
						44.8276	92.2087	0.637548	91.7	1.72368	5
						76.4706	183.635	1.12572	132.6	2.0463	7
						52.9412	109.93	0.723606	97.8	1.50926	7
						76.1905	163.617	1.01563	128.4	2.30108	2
						55	89.7043	0.656622	93	1.50242	4
						72.4138	167.061	1.0409	128	2.40602	5
						50	127.513	0.82417	109	1.51179	3
						82.6087	178.157	1.13205	137.5	2.55576	6
						43.75	135.774	0.879495	115.2	1.59778	3
						65	151.235	0.951598	121.3	1.95961	4
						37.931	106.504	0.68671	97.4	1.83083	5
						73.6842	161.635	1.0096	125.2	2.15491	8
						92.8571	172.783	1.08597	132.2	2.65462	1
						76.4706	177.339	1.08752	128.6	1.98457	7
						84.2105	155.565	0.989793	124.7	2.06116	9
						64.2857	121.443	0.774268	104.5	2.09839	1
						46.4286	96.7652	0.639233	93.6	1.87952	1
						50	104.365	0.748733	102.1	1.41609	3
						10	15.9304	0.420202	62.2	1.00485	4
						84.2105	175.896	1.10741	133.5	2.29776	8
						89.6552	186.939	1.17398	137.6	2.58647	5
						36.8421	112.922	0.727717	102.6	1.69587	9
						86.9565	161.878	1.02472	127.1	2.36245	6
						42.1053	72.5391	0.566539	80.7	1.38898	8
						13.7931	19.5304	0.355933	54.3	1.02068	5
						75	158.591	1.00835	127.4	2.05816	4
						36.8421	72.1043	0.563362	81.9	1.40964	8
						68.9655	126.226	0.808793	109.4	2.05639	5
						72.4138	138.539	0.867592	112.6	2.11654	5
						80	169.739	1.06344	129.1	2.08562	4
						11.7647	9.56522	0.426479	65.8	1.01543	7
						36.8421	123.6	0.784636	106.7	1.83649	8
						57.8947	122.278	0.784786	106.5	1.76033	9
						20.6897	23.1826	0.359499	55.4	1.04135	5
						14.2857	18.8696	0.322216	48.3	0.96988	1
						31.25	90.5565	0.63575	92.2	1.27878	3
						64.2857	139.409	0.890125	117.4	2.35743	1
						42.1053	93.7043	0.623817	88.9	1.46942	9
						55	76.5739	0.610789	87.8	1.41842	4
						80	175.774	1.10159	133.1	2.15024	4
						42.1053	89.513	0.641256	90.4	1.55594	8
						50	50.6261	0.546616	76.7	1.0638	3
						20	12.0174	0.423014	63.9	1.03231	4
						9.52381	11.2348	0.381876	57.2	1.02509	2
						46.4286	73.4087	0.524596	77.2	1.5502	1
						20	18	0.424598	66.2	1.06947	4
						92.8571	175.13	1.09446	130.9	2.62851	1
						68.4211	157.391	0.999328	127.7	2.11074	9
						58.6207	118.8	0.758342	104.7	1.96805	5
						10.5263	36.5391	0.409631	60.9	1.04819	8
						68.4211	95.0087	0.684608	94.1	1.55537	9
						9.52381	13.1304	0.382997	61	1.09319	2
						73.6842	164	1.00963	123.6	2.04298	9
						73.913	127.583	0.831621	109.7	2.03903	6
						82.3529	158.47	1.01502	126	1.94444	7
						50	123.061	0.830689	110.1	1.52705	3
						56.25	110.591	0.786952	107.7	1.49376	3
						10.5263	30.2783	0.422557	62.5	1.03306	9
						10.7143	22.6957	0.329002	49.8	1	1
						17.3913	46.5739	0.391893	59.7	1.10967	6
						73.6842	162.087	1.02988	129.8	2.23408	8
						31.5789	49.9304	0.476968	71.9	1.23752	8
						46.4286	98.1913	0.652088	93.2	1.87149	1
						52.6316	76.7652	0.56434	82	1.41136	8
						76.4706	180.487	1.1329	136.1	2.10031	7
						47.0588	59.2	0.538835	78.5	1.21142	7
						25	31.6174	0.354986	55.2	1.10843	1
						57.1429	150.852	0.943559	123.8	2.21864	2
						13.0435	32.3304	0.383654	60.2	1.11896	6
						60.8696	131.217	0.839137	111	2.0632	6
						50	124.209	0.814678	108.8	1.50902	3
						60	111.357	0.763373	103.1	1.66559	4
						11.7647	47.9652	0.426387	65	1.00309	7
						52.381	144.017	0.908904	119.6	2.14337	2
						80.9524	171.548	1.07082	130.7	2.34229	2
						33.3333	61.6696	0.514043	78.4	1.40502	2
						70	151.165	0.946615	121.5	1.96284	4
						78.9474	173.165	1.083	131.9	2.27022	8
						71.4286	132.626	0.846917	111	2.22892	1
						60.8696	136.487	0.853958	112.7	2.0948	6
						43.4783	92.7826	0.621181	86.5	1.60781	6
						25	84.5043	0.618486	88.1	1.22191	3
						47.8261	101.739	0.684702	96.4	1.79182	6
						65.2174	134.904	0.861976	113.1	2.10223	6
						58.8235	126.678	0.817398	111.4	1.71914	7
						82.6087	190.417	1.19384	139.2	2.58736	6
						26.087	32.7826	0.381735	57.3	1.06506	6
						73.6842	127.548	0.830556	108.1	1.86059	8
						15.7895	64.9217	0.471522	69.4	1.14711	9
						26.087	63.4087	0.492506	71.6	1.33086	6
						17.3913	42.8	0.408272	61.1	1.13569	6
						35.7143	87.3565	0.592899	86.5	1.73695	1
						52.9412	144.383	0.931492	122.3	1.88735	7
						55	94.9391	0.695225	95	1.53473	4
						84.2105	180.017	1.11021	130.1	2.23924	8
						65	163.722	1.03596	131	2.11632	4
						57.1429	144.852	0.917096	119.2	2.1362	2
						76.4706	173.896	1.08922	132.3	2.04167	7
						29.4118	92.1043	0.623686	90.4	1.39506	7
						35	106.609	0.694192	97.3	1.57189	4
						58.8235	132.783	0.841824	109.9	1.69599	7
						68.4211	169.861	1.06311	130.3	2.24269	8
						64.2857	118.122	0.761489	104	2.08835	1
						80	142.974	0.913572	118.5	1.91438	4
						10.5263	23.7913	0.398737	61.4	1.0568	8
						68.9655	128.748	0.819221	110	2.06767	5
						30	83.8957	0.574523	83	1.34087	4
						36.8421	48.6957	0.465236	69.5	1.19621	8
						36.8421	74.7478	0.556094	81.1	1.39587	8
						84.2105	143.217	0.928037	115.9	1.99484	8
						50	121.565	0.796383	106.7	1.47989	3
						52.9412	142.261	0.893536	114	1.75926	7
						35.2941	25.9652	0.445209	66.5	1.02623	7
						10.5263	41.5826	0.405194	61.3	1.05508	8
						82.7586	177.461	1.12465	134.7	2.53195	5
						14.2857	15.0435	0.380724	57.2	1.02509	2
						41.1765	48.4696	0.497288	70.7	1.09105	7
						57.8947	82.9391	0.623273	88.3	1.4595	9
						51.7241	123.374	0.797197	109.9	2.06579	5
						52.6316	74.2435	0.577443	82	1.41136	8
						67.8571	130.783	0.838837	113.6	2.28112	1
						64.7059	111.339	0.764238	102	1.57407	7
						87.5	165.722	1.06965	129.5	1.79612	3
						35	94.2783	0.636853	93.4	1.50889	4
						43.4783	106.47	0.694883	97.2	1.80669	6
						19.0476	65.3217	0.483395	72.3	1.2957	2
						68.75	145.548	0.930872	119.5	1.65742	3
						36.8421	65.513	0.545732	81.9	1.35372	9
						52.9412	76.2957	0.596669	83.8	1.29321	7
						11.7647	26.8522	0.426826	63.7	0.983025	7
						79.3103	171.2	1.06303	128.2	2.40977	5
						42.8571	106.191	0.691734	98.4	1.76344	2
						56.5217	100.817	0.683524	94.9	1.76394	6
						85.7143	128.8	0.85793	110.7	1.98387	2
						52.6316	98.0174	0.684703	96.9	1.66781	8
						72.4138	172.296	1.07153	129.9	2.44173	5
						84.2105	187.357	1.17828	137.8	2.37177	8
						25	55.3565	0.513547	78.1	1.26171	4
						79.3103	173.739	1.06766	127.9	2.40414	5
						65	142.73	0.907706	120.7	1.94992	4
						66.6667	95.9304	0.681619	94.1	1.68638	2
						17.3913	34.4	0.381373	56.9	1.05762	6
						19.0476	37.2696	0.420929	61.2	1.09677	2
						6.89655	4.64348	0.339872	53.8	1.01128	5
						73.6842	145.426	0.936892	121.6	2.09294	8
						65	145.183	0.921911	118.2	1.90953	4
						6.89655	14.9217	0.350216	52.1	0.979323	5
						15	17.4087	0.423341	65.3	1.05493	4
						84.2105	179.93	1.11033	131.1	2.25645	8
						35.2941	45.2522	0.48432	72.6	1.12037	7
						34.4828	78.5043	0.531593	77.8	1.46241	5
						62.5	79.4957	0.644522	86.8	1.20388	3
						11.7647	17.0087	0.425366	62	0.95679	7
						68.4211	100.157	0.718313	96.2	1.59008	9
						15.7895	67.0261	0.484805	72.6	1.2	9
						65.2174	101.026	0.678866	96.1	1.78625	6
						33.3333	53.6522	0.488324	73.2	1.31183	2
						52.381	108.626	0.71572	102	1.82796	2
						68.75	98.1391	0.719534	96.5	1.33842	3
						63.1579	134.209	0.851368	111	1.9105	8
						34.7826	68.5913	0.519683	76.5	1.42193	6
						89.4737	176.591	1.12217	133.3	2.29432	8
						41.1765	58.4	0.532288	76.5	1.18056	7
						39.1304	64.1217	0.498202	74.4	1.3829	6
						18.75	17.0783	0.483557	72.6	1.00693	3
						42.1053	56.5739	0.514262	76.9	1.27107	9
						35.7143	89.3739	0.597871	86.3	1.73293	1
						40	81.4435	0.621761	88.1	1.42326	4
						21.4286	28.6957	0.343559	52.1	1.04618	1
						75.8621	115.148	0.76955	102.4	1.92481	5
						90	180.174	1.10367	130	2.10016	4
						79.3103	165.843	1.02116	123	2.31203	5
						47.0588	77.1478	0.603619	85.1	1.31327	7
						10.5263	5.02609	0.391493	58.5	1.00688	8
						89.2857	186.591	1.17211	135.8	2.72691	1
						55	64.0174	0.550024	79.8	1.28918	4
						25	26.1217	0.335468	53.1	1.06627	1
						63.1579	104.052	0.739618	99.7	1.64793	9
						87.5	146.957	0.968558	119.5	1.65742	3
						70	177.304	1.11021	135.3	2.18578	4
						90.4762	185.548	1.15537	135.8	2.43369	2
						19.0476	22.5043	0.395257	59.8	1.07168	2
						58.6207	152.957	0.959887	122.5	2.30263	5
						21.7391	33.4087	0.377281	56.3	1.04647	6
						87.5	153.461	0.984933	121.6	1.68655	3
						68.4211	154.73	0.977248	124.6	2.0595	9
						29.4118	90.1043	0.613943	90.3	1.39352	7
						61.9048	117.652	0.782892	103.9	1.86201	2
						52.6316	65.1478	0.536716	78.1	1.34423	8
						50	99.7217	0.651383	92.8	1.86345	1
						89.4737	195.183	1.20912	139.4	2.39931	8
						63.1579	89.3565	0.667241	93.8	1.55041	9
						88.2353	172.713	1.09202	132	2.03704	7
						36.8421	42.4348	0.458254	69.2	1.19105	8
						9.52381	15.9478	0.384446	57.9	1.03763	2
						28.5714	116.243	0.745849	106.1	2.13052	1
						24.1379	52.8696	0.454604	70.5	1.32519	5
						57.8947	71.0609	0.566746	81.8	1.40792	8
						39.1304	105.478	0.68397	96.8	1.79926	6
						70.5882	148.087	0.941605	122.1	1.88426	7
						21.7391	71.2348	0.500188	73.5	1.36617	6
						39.2857	103.652	0.674095	98.1	1.96988	1
						78.5714	158.73	1.00658	127.6	2.56225	1
						41.1765	88.8348	0.653716	90.3	1.39352	7
						78.5714	146.348	0.918645	117.9	2.36747	1
						20.6897	52.3652	0.405193	62.1	1.16729	5
						73.6842	130.991	0.853487	112.3	1.93287	8
						67.8571	148.87	0.950132	123.7	2.48394	1
						14.2857	17.6696	0.384672	55.7	0.998208	2
						89.4737	194.974	1.19755	138	2.37522	8
						30	63.8261	0.548085	80.1	1.29402	4
						25	48.8	0.493424	75	1.21163	4
						70.5882	160.539	0.996325	122.7	1.89352	7
						55	71.5826	0.582697	83.7	1.35218	4
						25	8.15652	0.479828	72.6	1.00693	3
						43.75	120.748	0.792626	106.4	1.47573	3
						64.2857	106.643	0.713063	100.7	2.02209	1
						75	155.357	0.955853	120.1	2.41165	1
						12.5	5.93043	0.470419	70	0.970874	3
						31.0345	62.8174	0.451621	67.3	1.26504	5
						70	143.339	0.915478	118.6	1.91599	4
						21.7391	62.2435	0.459186	71.1	1.32156	6
						51.7241	79.9478	0.576451	85.7	1.6109	5
						48.2759	67.8087	0.518065	76.1	1.43045	5
						89.4737	191.339	1.17886	138.5	2.38382	8
						30	91.6696	0.620341	90	1.45396	4
						57.8947	117.913	0.76306	102	1.68595	9
						7.14286	2.81739	0.311798	45.4	0.911647	1
						57.1429	126.139	0.804688	109.4	1.96057	2
						38.0952	58.7826	0.501559	73.4	1.31541	2
						21.4286	55.5652	0.426728	64	1.28514	1
						25	52.2435	0.528411	77.1	1.06935	3
						87.5	196.887	1.22404	140.7	1.95146	3
						76.4706	139.183	0.91626	116.3	1.79475	7
						52.9412	127.67	0.828443	111.4	1.71914	7
						84.2105	164.33	1.02539	121.8	2.09639	8
						82.1429	151.078	0.953321	122.8	2.46586	1
						13.7931	34.0174	0.38238	59.9	1.12594	5
						66.6667	134.87	0.855624	113.1	2.02688	2
						80.9524	160.609	1.01733	125.5	2.2491	2
						70	162.07	1.03244	130.1	2.10178	4
						26.087	89.913	0.590316	85.9	1.59665	6
						25	57.7913	0.444468	67.8	1.36145	1
						71.4286	124.104	0.822312	106.5	1.9086	2
						47.0588	88.2435	0.616941	84.9	1.31019	7
						23.5294	30.2957	0.443132	65.9	1.01698	7
						27.5862	68.713	0.494186	73.2	1.37594	5
						51.7241	69.0609	0.523885	78	1.46617	5
						15	10.6087	0.415904	58.1	0.938611	4
						85.7143	180.539	1.14761	139	2.49104	2
						89.2857	180.887	1.13175	134.5	2.7008	1
						43.75	76.5565	0.572055	78.2	1.0846	3
						71.4286	118.278	0.763827	101.7	2.04217	1
						52.381	82.8348	0.612005	86.6	1.55197	2
						31.25	25.113	0.484507	73.3	1.01664	3
						57.8947	105.896	0.717575	96.9	1.66781	8
						37.931	39.4261	0.399168	61.5	1.15602	5
						76.1905	134.139	0.873309	112.1	2.00896	2
						47.3684	89.9652	0.659324	92	1.52066	9
						75	164.226	1.01553	124.5	2.01131	4
						86.9565	185.478	1.145	134.8	2.50558	6
						21.0526	28.6087	0.434176	66.4	1.09752	9
						56.25	152.922	0.964315	120.1	1.66574	3
						25	75.0609	0.534723	78.5	1.26817	4
						15	10.6087	0.416408	62.5	1.00969	4
						25	37.4783	0.457073	66.9	1.08078	4
						40	114.278	0.744487	100.8	1.62843	4
						10.7143	28.6609	0.347608	53.6	1.07631	1
						17.8571	58.5913	0.451192	68.2	1.36948	1
						26.3158	46.7826	0.44158	65.4	1.12565	8
						10.5263	23.7913	0.400296	61.6	1.06024	8
						47.0588	89.7043	0.65045	89.6	1.38272	7
						52.6316	141.548	0.898623	118.6	1.96033	9
						6.89655	16.0174	0.345059	52.1	0.979323	5
						57.1429	92.2957	0.625427	88.5	1.77711	1
						84.2105	134.991	0.867932	113.7	1.95697	8
						11.7647	19.8087	0.429566	66.1	1.02006	7
						75	168.47	1.04945	126.7	1.75728	3
						63.1579	133.6	0.85017	113.6	1.87769	9
						15.7895	6.88696	0.389339	57.7	0.993115	8
						82.7586	144.852	0.939391	118	2.21805	5
						36.8421	115.565	0.739211	102.3	1.69091	9
						73.6842	166.591	1.03539	127.3	2.10413	9
						78.5714	160.209	0.999509	125.4	2.51807	1
						60	116.452	0.747145	101.7	1.64297	4
						36.8421	85.8783	0.613454	87.8	1.51119	8
						75	181.009	1.12648	133.7	1.85437	3
						68.4211	121.687	0.797484	104.7	1.80207	8
						78.9474	136.539	0.894682	115.1	1.98107	8
						17.6471	19.3565	0.42493	61.7	0.95216	7
						26.087	45.513	0.419722	61.8	1.1487	6
						52.9412	121.235	0.780119	105.2	1.62346	7
						89.4737	196.035	1.21778	138.3	2.28595	9
						10	5.0087	0.419243	63.9	1.03231	4
						79.3103	155.061	0.96978	121.5	2.28383	5
						73.913	171.322	1.05265	126.6	2.35316	6
						36.8421	51.0609	0.504497	75.3	1.24463	9
						25	36.5391	0.455615	69	1.1147	4
						21.7391	29.6	0.378824	57.3	1.06506	6
						19.0476	80.1913	0.54039	79.8	1.43011	2
						23.5294	36.5043	0.455708	64.9	1.00154	7
						65.2174	116	0.765347	103.3	1.92007	6
						26.087	68.9913	0.490696	73.2	1.36059	6
						58.6207	149.548	0.944501	122.6	2.30451	5
						75	142.591	0.950161	118	1.63662	3
						79.3103	171.27	1.0779	132	2.4812	5
						17.8571	39.7913	0.371231	55.9	1.12249	1
						65.2174	119.374	0.802652	107.5	1.99814	6
						60.8696	122.191	0.808532	107.7	2.00186	6
						57.1429	86.9217	0.639917	92.8	1.66308	2
						52.381	111.026	0.721478	99.7	1.78674	2
						35.2941	72.7304	0.577978	84.8	1.30864	7
						7.14286	5.51304	0.310617	43.9	0.881526	1
						80	174.243	1.10032	131.7	2.12763	4
						21.0526	37.6522	0.457745	69.8	1.15372	9
						17.8571	20.7826	0.333275	49.7	0.997992	1
						69.5652	135.843	0.867662	114.5	2.12825	6
						78.5714	140.817	0.894421	117.5	2.35944	1
						71.4286	151.687	0.942596	119.6	2.14337	2
						89.4737	189.478	1.1703	135.6	2.24132	9
						60.8696	125.478	0.801484	108.2	2.01115	6
						25	34.5565	0.368806	55	1.10442	1
						82.6087	159.67	0.995819	123.4	2.29368	6
						56.5217	134.904	0.852238	112.7	2.0948	6
						17.8571	55.5652	0.429998	64.9	1.30321	1
						23.8095	37.8261	0.435184	65	1.16487	2
						70	137.861	0.884507	116.1	1.87561	4
						75	174.122	1.10681	134	2.16478	4
						86.9565	185.965	1.16556	138.3	2.57063	6
						65.2174	100.139	0.68629	95.2	1.76952	6
						37.5	74.1391	0.57339	83.4	1.15673	3
						40	31.0609	0.445219	63.4	1.02423	4
						68.4211	153.374	0.974284	123.7	2.04463	9
						88.2353	192.591	1.18554	138.7	2.14043	7
						89.4737	184.278	1.1617	136.6	2.25785	9
						10.5263	16.5739	0.399499	59.6	1.02582	8
						35	45.7043	0.485372	71.2	1.15024	4
						39.1304	103.183	0.676514	94.8	1.76208	6
						15.7895	54.4174	0.450487	67.1	1.15491	8
						42.1053	91.4435	0.616138	91.3	1.50909	9
						40	62.5217	0.534143	77.2	1.24717	4
						42.1053	110.539	0.715205	98.2	1.69019	8
						15	34.1913	0.442948	64.2	1.03716	4
						78.5714	137.896	0.877624	113.3	2.2751	1
						44.8276	56.8	0.466962	70.5	1.32519	5
						50	93.0783	0.614735	89.2	1.79116	1
						75	156.435	0.990747	123.2	1.99031	4
						10.5263	28.7304	0.427962	64.6	1.06777	9
						46.4286	100	0.665635	91.9	1.84538	1
						6.89655	3.72174	0.339564	53	0.996241	5
						26.3158	41.7043	0.463884	67.3	1.1124	9
						85.7143	181.391	1.13232	134.4	2.6988	1
						28.5714	59.4609	0.450244	68.9	1.38353	1
						48.2759	109.461	0.706671	99	1.8609	5
						15	68.1391	0.495458	71.8	1.15994	4
						17.6471	29.7217	0.432338	64	0.987654	7
						52.1739	68.4348	0.530679	77.9	1.44796	6
						6.89655	17.2696	0.347179	53	0.996241	5
						84.2105	174.174	1.085	130.3	2.15372	9
						10	7.51304	0.414749	61.3	0.990307	4
						50	129.409	0.83202	110.2	1.78029	4
						87.5	183.148	1.1597	136.3	1.89043	3
						65	157.774	0.995298	124.5	2.01131	4
						52.381	101.687	0.704243	96.8	1.73477	2
						82.1429	143.217	0.918341	119.1	2.39157	1
						26.087	44.6435	0.417377	61.6	1.14498	6
						82.3529	184.313	1.14297	134.6	2.07716	7
						31.5789	97.4957	0.646108	95.4	1.57686	9
						14.2857	16.5391	0.321884	48.5	0.973896	1
						70	113.217	0.777008	103.8	1.6769	4
						52.381	71.0261	0.558954	81.3	1.45699	2
						10	19.3913	0.424953	62.7	1.01292	4
						15.7895	12.487	0.412546	64.6	1.06777	9
						61.9048	73.1478	0.576356	83.7	1.5	2
						72.4138	121.687	0.798614	105.8	1.98872	5
						36.8421	51.113	0.484595	74.3	1.27883	8
						23.5294	32.5565	0.44495	62.6	0.966049	7
						73.6842	170.365	1.06433	130.2	2.15207	9
						68.75	145.496	0.923932	117.5	1.62968	3
						89.4737	178	1.1207	135.7	2.24298	9
						88.2353	195.374	1.2435	143.8	2.21914	7
						68.4211	99.8435	0.698777	95.6	1.64544	8
						80.9524	178.226	1.12556	137	2.4552	2
						65.2174	104.73	0.69634	94.8	1.76208	6
						26.3158	77.9826	0.56526	83.4	1.43546	8
						28.5714	47.3217	0.399863	61.2	1.22892	1
						40	40.5391	0.465172	68.6	1.10824	4
						66.6667	120.296	0.804069	105.2	1.8853	2
						78.9474	161.043	1.02448	128	2.2031	8
						40	31.3913	0.459325	67.1	1.08401	4
						64.7059	103.565	0.718772	97.8	1.50926	7
						40	123.374	0.791798	108.8	1.75767	4
						47.3684	110.157	0.720355	99.1	1.63802	9
						62.5	58.487	0.570004	79.5	1.10264	3
						23.5294	23.8957	0.437524	66.5	1.02623	7
						23.5294	47.3913	0.478762	70.9	1.09414	7
						71.4286	157.913	0.99798	125.7	2.25269	2
						6.89655	5.28696	0.345006	56	1.05263	5
						73.913	169.635	1.05617	128.9	2.39591	6
						86.9565	145.704	0.945794	119.6	2.22305	6
						58.6207	132.191	0.838737	112.3	2.1109	5
						23.5294	86.2261	0.592454	84.1	1.29784	7
						63.1579	119.722	0.803666	104.4	1.72562	9
						82.6087	164.678	1.03308	125.9	2.34015	6
						81.25	179.513	1.12773	136	1.88627	3
						25	58.1913	0.500795	73.5	1.01942	3
						73.913	171.287	1.07821	131.8	2.44981	6
						89.6552	182.661	1.14201	135.5	2.54699	5
						86.9565	178.557	1.12479	135.2	2.51301	6
						82.6087	148.852	0.958326	120.8	2.24535	6
						58.8235	85.6348	0.644186	91.6	1.41358	7
						21.4286	44.6261	0.392303	60.3	1.21084	1
						85.7143	182.087	1.1307	135.9	2.43548	2
						89.6552	192.713	1.21028	139.3	2.61842	5
						76.1905	109.53	0.754597	102.7	1.8405	2
						47.3684	109.652	0.724635	96.2	1.65577	8
						36.8421	78.7826	0.582305	84.9	1.46127	8
						50	104.991	0.682473	97.1	1.9498	1
						76.4706	140.783	0.913144	119.4	1.84259	7
						29.4118	22.2783	0.429157	65.8	1.01543	7
						11.7647	4.62609	0.416625	60.5	0.933642	7
						30.4348	46.9739	0.423559	63.2	1.17472	6
						50	86.3652	0.595178	85.6	1.71888	1
						28.5714	46.4	0.398519	57.5	1.15462	1
						51.7241	149.409	0.942149	122	2.29323	5
						15	63.4087	0.481436	72.6	1.17286	4
						25	49.7565	0.501015	73.5	1.1874	4
						30.4348	94.9913	0.632648	96.3	1.78996	6
						24.1379	75.8261	0.520102	79.8	1.5	5
						78.5714	169.096	1.05276	128.8	2.58635	1
						70.5882	159.687	1.00151	124.5	1.9213	7
						72.4138	130.835	0.848564	115.7	2.17481	5
						68.75	79.5826	0.637611	86.8	1.20388	3
						15.7895	15.4087	0.41313	64	1.05785	9
						46.4286	111.026	0.715172	99.1	1.98996	1
						78.2609	150.313	0.947753	119.7	2.22491	6
						88.2353	189.826	1.20935	141.6	2.18519	7
						43.4783	63.8783	0.498473	75.5	1.40335	6
						82.3529	188.157	1.17092	137.9	2.12809	7
						42.8571	80.8522	0.562105	83.5	1.67671	1
						20	28.713	0.437761	65.4	1.05654	4
						34.7826	64.8348	0.503441	75.4	1.40149	6
						78.9474	163.565	1.03242	128.7	2.12727	9
						78.9474	153.009	0.968016	121.6	2.00992	9
						39.2857	77.113	0.534224	79	1.58635	1
						47.3684	75.1826	0.593572	86.5	1.42975	9
						75	171.67	1.07303	130.6	2.10985	4
						12.5	2.55652	0.472355	72.4	1.00416	3
						55.1724	99.2348	0.67027	93.1	1.75	5
						64.7059	163.93	1.01995	125.6	1.93827	7
						90.4762	175.93	1.11014	133.4	2.39068	2
						41.1765	112.209	0.732236	103.2	1.59259	7
						85.7143	181.061	1.13299	134.5	2.41039	2
						78.9474	127.009	0.830144	110.5	1.90189	8
						90	190.435	1.14861	131.1	2.11793	4
						53.5714	98.5739	0.65882	94.2	1.89157	1
						85.7143	177.217	1.10981	134.2	2.40502	2
						66.6667	115.774	0.775864	103.3	1.85125	2
						42.8571	110.035	0.711572	96.7	1.73297	2
						82.6087	172.035	1.06632	129.9	2.4145	6
						84.2105	155.809	0.984424	119.1	2.04991	8
						24.1379	48.6435	0.433899	67.9	1.27632	5
						9.52381	14	0.380502	57.8	1.03584	2
						37.931	74.6957	0.544219	80.2	1.50752	5
						90.4762	187.722	1.17066	138.6	2.48387	2
						80	127.374	0.873031	114.1	1.8433	4
						26.3158	45.1826	0.470541	68.9	1.13884	9
						58.6207	99.8261	0.682961	96	1.80451	5
						58.8235	65.8261	0.562826	81.6	1.25926	7
						88.2353	172.8	1.08499	131.3	2.02623	7
						87.5	185.252	1.15552	138.4	1.91956	3
						9.52381	5.61739	0.375973	59.6	1.0681	2
						17.6471	24.1391	0.428263	65.5	1.0108	7
						76.4706	148.696	0.950487	115.3	1.77932	7
						34.7826	79.0087	0.542169	81.4	1.51301	6
						90	176.539	1.11064	133.4	2.15509	4
						80.9524	169.513	1.06109	127.8	2.29032	2
						12.5	16.2783	0.466042	66	0.915395	3
						89.4737	179.965	1.12353	132.2	2.27539	8
						68.4211	108.087	0.752307	103.4	1.77969	8
						15	23.7217	0.423621	61	0.98546	4
						52.1739	88.5217	0.620026	89.8	1.66914	6
						73.6842	129.357	0.843386	110.7	1.90534	8
						57.8947	139.478	0.879233	115.9	1.9157	9
						70.5882	127.583	0.823791	110.3	1.70216	7
						71.4286	146.296	0.921136	118.7	2.38353	1
						55	96.713	0.699041	95.6	1.54443	4
						89.4737	183.896	1.12544	132.9	2.28744	8
						80.9524	176.243	1.11143	134.3	2.40681	2
						52.6316	123.791	0.792953	110	1.81818	9
						34.4828	45.5478	0.426589	63.1	1.18609	5
						68.75	124.522	0.844189	110.5	1.53259	3
						6.89655	2.64348	0.339251	50.8	0.954887	5
						57.1429	99.687	0.692777	97.6	1.7491	2
						10.5263	5.63478	0.388245	56.7	0.975904	8
						20.6897	55.2174	0.458554	72.3	1.35902	5
						23.8095	37.913	0.429641	65	1.16487	2
						57.8947	112.209	0.775286	104.7	1.73058	9
						90	188.887	1.18505	138	2.2294	4
						84.2105	176.452	1.11768	134.7	2.31842	8
						37.5	47.1304	0.520254	75.9	1.0527	3
						66.6667	109.67	0.749834	102.7	1.8405	2
						75	146.313	0.917533	119.8	2.40562	1
						64.2857	109.878	0.71915	100.6	2.02008	1
						52.1739	72.8348	0.537256	77.4	1.43866	6
						38.0952	57.6696	0.496386	74	1.32616	2
						85.7143	181.948	1.13713	136.9	2.45341	2
						21.4286	46.0696	0.396579	57.7	1.15863	1
						63.1579	120.174	0.805243	104.2	1.72231	9
						6.89655	30.7826	0.370734	57.4	1.07895	5
						9.52381	16.9043	0.385059	58.4	1.04659	2
						41.1765	74.9043	0.593397	87.4	1.34877	7
						9.52381	11.1826	0.377304	59	1.05735	2
						76.1905	163.061	1.02476	128.9	2.31004	2
						73.6842	151.635	0.974533	125.2	2.15491	8
						73.6842	178.278	1.10369	131.9	2.27022	8
						68.4211	119.878	0.79227	107.2	1.84509	8
						11.7647	31.0609	0.440064	65.8	1.01543	7
						60.7143	124.661	0.795353	108.3	2.1747	1
						78.9474	152.209	0.975689	120.2	2.06885	8
						12.5	18.1217	0.4835	71.8	0.995839	3
						60.7143	134.104	0.853544	112.6	2.26104	1
						76.4706	146.852	0.924949	117.4	1.81173	7
						50	96.2087	0.650244	91.9	1.84538	1
						42.8571	88.8696	0.598867	89.6	1.7992	1
						56.25	128.991	0.835733	109.9	1.52427	3
						38.0952	54.0696	0.484637	71.5	1.28136	2
						64.7059	109.583	0.73065	97.8	1.50926	7
						11.7647	4.62609	0.421511	62.2	0.959877	7
						55	129.252	0.817532	108.3	1.7496	4
						78.9474	132.887	0.875278	113.7	1.95697	8
						89.4737	169.93	1.06888	129.1	2.22203	8
						42.8571	64.9739	0.488401	72.3	1.45181	1
						68.4211	123.548	0.815663	109.2	1.87952	8
						36.8421	93.3043	0.634226	91.4	1.57315	8
						56.25	164.557	1.02555	126.5	1.75451	3
						66.6667	130.417	0.83403	112.3	2.01254	2
						14.2857	36.3652	0.353724	55.7	1.11847	1
						12.5	7.25217	0.471928	68.7	0.952843	3
						47.619	95.0087	0.66794	97.3	1.74373	2
						17.6471	19.8609	0.435134	66	1.01852	7
						25	44.5739	0.486837	73.4	1.18578	4
						84.2105	174.348	1.10102	133.9	2.21322	9
						15.7895	68.9043	0.496324	75.3	1.24463	9
						86.2069	185.287	1.14721	134.5	2.5282	5
						26.3158	51.2522	0.482929	70.3	1.20998	8
						52.9412	144.122	0.921623	121.5	1.875	7
						8.69565	47.1652	0.396621	63.9	1.18773	6
						64.7059	175.774	1.09307	131.3	2.02623	7
						75	150.591	0.950287	125.3	2.51606	1
						43.4783	67.113	0.524803	78.9	1.46654	6
						79.3103	168.122	1.04213	128.7	2.41917	5
						50	118.817	0.750694	99.6	2	1
						82.3529	181.983	1.1516	137.2	2.11728	7
						75	157.165	0.98413	121.7	1.96607	4
						89.2857	146.47	0.943836	123.4	2.47791	1
						65.5172	121.078	0.80142	107.7	2.02444	5
						75	146.261	0.939185	117.7	1.63245	3
						76.4706	181.061	1.13479	134.4	2.07407	7
						8.69565	5.44348	0.345043	52.2	0.97026	6
						14.2857	6.57391	0.317931	50.7	1.01807	1
						82.3529	166.835	1.04205	125.7	1.93981	7
						64.7059	151.565	0.956642	122.1	1.88426	7
						11.7647	25.2348	0.442769	68.5	1.0571	7
						68.4211	154.226	0.962378	120.8	1.99669	9
						82.1429	162.957	1.01697	127	2.5502	1
						17.8571	12.6783	0.321648	49.4	0.991968	1
						80.9524	172.191	1.0794	130.2	2.33333	2
						26.3158	30.4348	0.417102	61.8	1.06368	8
						52.6316	104.887	0.704985	97.9	1.68503	8
						21.0526	36.2087	0.450601	67.4	1.11405	9
						31.5789	49.9304	0.474302	70.1	1.20654	8
						32.1429	67.5478	0.492781	72.5	1.45582	1
						56.5217	110.73	0.73488	98.9	1.83829	6
						71.4286	114.922	0.777037	106.2	1.90323	2
						21.0526	88.1217	0.587614	85.2	1.40826	9
						19.0476	34.1565	0.418464	61.2	1.09677	2
						68.4211	140.557	0.894058	111.7	1.92255	8
						76.4706	169.809	1.0674	130	2.00617	7
						87.5	165.2	1.04239	126.9	1.76006	3
						21.0526	35.6174	0.42988	64.1	1.10327	8
						75	191.791	1.17844	136.6	1.89459	3
						50	110.035	0.738536	100.2	1.38974	3
						36.8421	83.8087	0.627854	90.9	1.50248	9
						52.9412	131.757	0.838236	109.9	1.69599	7
						87.5	152.122	0.985449	123.9	1.71845	3
						46.4286	87.9652	0.594737	86.2	1.73092	1
						26.087	43.8957	0.417375	61.3	1.13941	6
						25	46.5217	0.48214	71.2	1.15024	4
						47.3684	44.7478	0.462689	66.6	1.1463	8
						13.0435	17.9304	0.35128	53.9	1.00186	6
						50	108.817	0.764021	103	1.66397	4
						75.8621	156.087	0.985489	124.9	2.34774	5
						42.8571	87.0435	0.585468	87.3	1.75301	1
						21.0526	32.6957	0.439284	68	1.12397	9
						50	136.8	0.868028	115.1	1.59639	3
						80.9524	169.026	1.05202	128.3	2.29928	2
						13.0435	59.3043	0.441691	68.7	1.27695	6
						10.3448	9.87826	0.340205	51.1	0.960526	5
						29.4118	71.2696	0.530716	79.9	1.23302	7
						11.7647	8.4	0.4203	63.6	0.981481	7
						26.3158	32.7304	0.43219	64.1	1.10327	8
						10	5.0087	0.412102	60.4	0.975767	4
						38.0952	48.9739	0.475782	72.3	1.2957	2
						10.5263	15.7391	0.396845	54.9	0.944923	8
						26.087	66.487	0.505618	73.5	1.36617	6
						42.8571	62.9739	0.473622	69.7	1.3996	1
						43.75	112.4	0.745161	101.1	1.40222	3
						93.1034	180.348	1.13041	133.5	2.5094	5
						31.25	30.7826	0.491511	70.7	0.980583	3
						45	82.1565	0.619092	88.4	1.42811	4
						27.5862	66.8696	0.509816	75	1.40977	5
						57.8947	102.591	0.721522	98.3	1.69191	8
						13.0435	56.2435	0.429311	63.5	1.1803	6
						87.5	129.478	0.865606	109.7	1.5215	3
						41.3793	97.3043	0.63967	91.7	1.72368	5
						82.7586	180.157	1.13928	136.1	2.55827	5
						89.2857	193.148	1.20088	137.2	2.75502	1
						60.8696	116.678	0.743092	101.4	1.88476	6
						52.9412	91.9826	0.672475	94.8	1.46296	7
						73.6842	134.139	0.902301	116.4	1.92397	9
						81.25	144.017	0.954404	118.4	1.64216	3
						89.2857	156.035	0.984581	122.6	2.46185	1
						11.7647	25.2348	0.430029	63.2	0.975309	7
						23.8095	82.9391	0.562926	82.6	1.48029	2
						66.6667	149.826	0.943741	122.6	2.19713	2
						25	42.9043	0.477509	71.2	1.15024	4
						30	45.7913	0.4735	70.3	1.1357	4
						36.8421	54.6087	0.496212	76.3	1.31325	8
						28.5714	87.7391	0.58654	86.4	1.54839	2
						43.4783	82.1043	0.583814	85.9	1.59665	6
						43.75	58.1565	0.560317	82.8	1.1484	3
						53.5714	121.443	0.780295	107.6	2.16064	1
						57.8947	123.374	0.800751	107.3	1.84682	8
						50	102.052	0.675828	96.1	1.5525	4
						82.3529	171.287	1.08652	132	2.03704	7
						80.9524	176.452	1.09499	131.8	2.36201	2
						82.3529	177.2	1.13741	136.7	2.10957	7
						47.8261	119.322	0.755679	103.4	1.92193	6
						23.5294	39.0087	0.458888	66.7	1.02932	7
						11.7647	15.7913	0.425752	66.7	1.02932	7
						43.75	26.6783	0.488618	69.7	0.966713	3
						21.0526	39.9478	0.453848	67.9	1.12231	9
						23.8095	30.4174	0.412052	61.3	1.09857	2
						55	79.287	0.618176	87.4	1.41195	4
						56.25	104.609	0.760404	101.9	1.41331	3
						47.0588	77.4783	0.594897	84	1.2963	7
						39.1304	83.2696	0.586756	85	1.57993	6
						63.1579	128.122	0.823561	108.9	1.8	9
						46.4286	50.5043	0.427756	63.3	1.27108	1
						58.6207	127.217	0.81479	111	2.08647	5
						52.6316	122.104	0.787577	106.9	1.83993	8
						68.4211	171.93	1.07736	132	2.27194	8
						60.7143	105.739	0.696313	98.3	1.9739	1
						31.25	26.3478	0.491333	72.6	1.00693	3
						36.8421	93.5304	0.633888	89.5	1.54045	8
						23.8095	64.087	0.46529	69.3	1.24194	2
						17.2414	19.8435	0.350103	53.7	1.0094	5
						56.5217	109.043	0.721912	98.4	1.829	6
						38.0952	77.3913	0.580652	87.2	1.56272	2
						11.7647	4.62609	0.422155	63.3	0.976852	7
						91.3043	184.278	1.15469	136.5	2.53717	6
						34.4828	49.9478	0.440674	66.7	1.25376	5
						8.69565	8.62609	0.343903	51	0.947955	6
						23.5294	81.4783	0.575463	83.4	1.28704	7
						82.7586	169.357	1.05352	129.7	2.43797	5
						85.7143	179.948	1.1223	133.9	2.68876	1
						15.7895	36.7826	0.404715	61.3	1.05508	8
						41.3793	82.5739	0.582478	81.6	1.53383	5
						23.8095	46.0174	0.444855	66.2	1.18638	2
						15	26.5913	0.435754	65.7	1.06139	4
						56.25	135.809	0.887221	111.7	1.54924	3
						25	32.4522	0.359928	52.1	1.04618	1
						10	21.5826	0.422263	62.8	1.01454	4
						81.25	181.896	1.12942	134.9	1.87101	3
						15.7895	27.4957	0.422245	64.9	1.07273	9
						28.5714	86.9565	0.587982	85.5	1.71687	1
						92.8571	158.191	1.00934	126.8	2.54618	1
						75	149.391	0.949875	121.1	1.95638	4
						44.8276	64.8174	0.504853	74.8	1.40602	5
						89.4737	188.487	1.18598	137.9	2.27934	9
						64.7059	136.313	0.868208	112.6	1.73765	7
						25	53.7739	0.501827	74.2	1.19871	4
						93.1034	179.357	1.10912	131.8	2.47744	5
						35.2941	114.139	0.739774	102.3	1.5787	7
						26.087	40.1739	0.404085	61.6	1.14498	6
						84.2105	178.139	1.10763	134.3	2.31153	8
						9.52381	8.03478	0.37769	56.6	1.01434	2
						58.8235	102.835	0.689149	95.3	1.47068	7
						64.2857	133.304	0.846418	112.8	2.26506	1
						10.5263	23.3565	0.403253	58.1	1	8
						52.6316	121.287	0.805405	109.7	1.88812	8
						63.1579	127.2	0.823399	106.8	1.83821	8
						52.381	95.9478	0.666926	93.5	1.67563	2
						35	88	0.599757	85.8	1.38611	4
						11.7647	4.1913	0.418916	62.5	0.964506	7
						23.5294	27.3391	0.434375	66.7	1.02932	7
						14.2857	58.087	0.443947	67.2	1.2043	2
						47.619	102.087	0.672944	95.7	1.71505	2
						85	165.722	1.02814	124.4	2.00969	4
						57.8947	95.2696	0.685074	94.6	1.56364	9
						47.0588	88.1043	0.648077	88.7	1.36883	7
						52.1739	102.487	0.674901	96.1	1.78625	6
						12.5	34.8	0.477247	70.8	0.981969	3
						17.3913	42.7826	0.395946	60.1	1.1171	6
						20.6897	30.0696	0.379362	56.4	1.06015	5
						60.7143	116.191	0.75242	102	2.04819	1
						55	93.4087	0.691574	94.8	1.5315	4
						53.5714	122.887	0.785532	105.6	2.12048	1
						42.8571	126.47	0.797086	109.5	1.96237	2
						81.25	145.252	0.962808	119.2	1.65326	3
						47.0588	86.3304	0.600927	82.8	1.27778	7
						15.7895	43.3913	0.417764	62.2	1.07057	8
						60.8696	89.3391	0.622933	88.7	1.6487	6
						41.3793	89.3391	0.597347	88.8	1.66917	5
						62.5	144.226	0.930019	119.4	1.65603	3
						51.7241	98.887	0.647944	95.8	1.80075	5
						52.6316	126.922	0.802403	105.7	1.74711	9
						89.2857	196.07	1.21823	139.8	2.80723	1
						69.5652	135.235	0.880759	113.1	2.10223	6
						7.14286	3.33913	0.314006	45	0.903614	1
						90	180.609	1.13275	134	2.16478	4
						45	103.565	0.680749	94.4	1.52504	4
						47.619	58.8696	0.511049	74.7	1.33871	2
						70	171.165	1.06944	129.3	2.08885	4
						63.1579	129.513	0.831266	107.6	1.85198	8
						10.3448	9.63478	0.342473	54	1.01504	5
						75	142.261	0.918894	113	1.56727	3
						62.5	138.957	0.890577	114.3	1.5853	3
						89.2857	193.757	1.229	142.7	2.86546	1
						51.7241	130.783	0.833012	111.2	2.09023	5
						63.1579	92.4174	0.67508	92.6	1.53058	9
						73.6842	126.852	0.846427	110.7	1.90534	8
						47.619	84.2261	0.615476	88.6	1.58781	2
						73.6842	176	1.08587	129.2	2.22375	8
						26.3158	45.1652	0.463351	69.8	1.15372	9
						17.8571	40.5565	0.363666	54.6	1.09639	1
						87.5	152.122	0.979966	123.9	1.71845	3
						70.5882	155.757	0.984623	123.8	1.91049	7
						52.9412	126.87	0.822574	110.9	1.71142	7
						23.5294	32.7478	0.449553	66.1	1.02006	7
						15.7895	63.287	0.463996	67.9	1.12231	9
						57.8947	95.0435	0.658891	92.1	1.5852	8
						15	29.2348	0.436711	63.1	1.01939	4
						65	132.591	0.847599	112.2	1.8126	4
						19.0476	55.5652	0.480052	73.7	1.32079	2
						12.5	5.46087	0.467734	68.8	0.95423	3
						25	88.9043	0.634936	88.5	1.22746	3
						21.7391	41.1652	0.40855	63.3	1.17658	6
						52.381	122.261	0.785556	109.6	1.96416	2
						42.8571	91.9304	0.614936	86.3	1.73293	1
						18.75	33.4261	0.492611	71.6	0.993065	3
						57.8947	136.243	0.875364	112.5	1.93632	8
						60.8696	100.835	0.693761	95.3	1.77138	6
						39.2857	70.1739	0.50301	73.2	1.46988	1
						31.0345	43.4261	0.410555	63.8	1.19925	5
						8.69565	19.8087	0.348598	54	1.00372	6
						37.5	102.991	0.711393	95	1.31761	3
						80.9524	187.026	1.19192	141.3	2.53226	2
						56.5217	134.47	0.852121	113.6	2.11152	6
						63.1579	156.522	0.993734	126.1	2.0843	9
						31.25	102.104	0.685938	93.9	1.30236	3
						68.9655	144.209	0.915239	120.8	2.27068	5
						36.8421	58.0696	0.514564	75.4	1.29776	8
						52.9412	118.783	0.761431	103.4	1.59568	7
						36.8421	55.9304	0.51186	77.3	1.27769	9
						14.2857	28.5391	0.399489	62.9	1.12724	2
						33.3333	45.8087	0.457804	69.2	1.24014	2
						65.2174	136.783	0.880364	116.1	2.15799	6
						10.5263	15.8435	0.410581	62.6	1.03471	9
						28.5714	48.5913	0.411084	60.5	1.21486	1
						36.8421	60.7478	0.530349	78.3	1.29421	9
						66.6667	107.061	0.728875	96.8	1.73477	2
						10.3448	21.0435	0.351432	54.3	1.02068	5
						90.4762	189.774	1.18634	139.8	2.50538	2
						75	143.757	0.922679	115.3	1.59917	3
						6.89655	8.92174	0.3463	54.4	1.02256	5
						21.7391	70.1217	0.49775	73.1	1.35874	6
						43.75	63.7217	0.521982	75.5	1.04716	3
						78.2609	147.722	0.938876	121	2.24907	6
						84.2105	165.374	1.04501	128.6	2.21343	8
						18.75	65.1652	0.525695	76.7	1.0638	3
						63.1579	105.93	0.722891	100.4	1.72806	8
						65.5172	119.565	0.771232	106.7	2.00564	5
						82.1429	162.8	1.02901	126.8	2.54618	1
						78.9474	156.974	1.00818	124.7	2.1463	8
						25	38.0348	0.456223	68.9	1.11309	4
						40	56.087	0.518559	74.1	1.19709	4
						25	50.4696	0.527036	77.7	1.07767	3
						85.7143	177.078	1.11152	134.1	2.40323	2
						31.25	82.7652	0.627961	90.3	1.25243	3
						36.8421	85.8261	0.602929	88.6	1.52496	8
						78.9474	177.078	1.10367	133.6	2.20826	9
						58.8235	135.078	0.866066	113.2	1.74691	7
						37.931	78.0348	0.558397	82.7	1.55451	5
						13.0435	38.5739	0.38371	59.8	1.11152	6
						37.931	88.1565	0.589455	86	1.61654	5
						47.619	70.9217	0.556056	81.8	1.46595	2
						36.8421	111.6	0.723923	99.2	1.63967	9
						10	21.2696	0.424822	63.9	1.03231	4
						43.75	28.0696	0.493473	72.2	1.00139	3
						28.5714	52.6261	0.419313	61.7	1.23896	1
						42.1053	63.8783	0.542115	79.1	1.30744	9
						56.5217	139.357	0.879855	113.1	2.10223	6
						89.6552	188.643	1.1476	133.2	2.50376	5
						65.2174	131.252	0.846004	112	2.08178	6
						91.3043	180.122	1.11768	133.3	2.4777	6
						75	188.783	1.16905	136.9	1.89875	3
						79.3103	159.496	1.00699	125.8	2.36466	5
						47.3684	100.783	0.661369	94.9	1.5686	9
						35	98.5565	0.661579	92.1	1.48788	4
						56.5217	131.513	0.838452	111.8	2.07807	6
						12.5	52.2783	0.526008	77.1	1.06935	3
						26.3158	48.9565	0.473753	70	1.20482	8
						50	99.0087	0.711493	97.4	1.57351	4
						39.2857	95.2348	0.633758	91.1	1.82932	1
						84.2105	158.33	1.00864	124.7	2.1463	8
						14.2857	55.2696	0.431125	65.4	1.17204	2
						61.9048	123.843	0.799212	105.9	1.89785	2
						56.25	142.87	0.909812	115.4	1.60055	3
						39.2857	100.817	0.660862	96.3	1.93373	1
						3.57143	1.0087	0.314548	49.8	1	1
						4.7619	44.087	0.377142	55.8	1	2
						6.25	15.7043	0.474544	72.1	1	3
						5	1.47826	0.414795	61.9	1	4
						3.44828	11.687	0.344634	53.2	1	5
						4.34783	1.13043	0.344748	53.8	1	6
						5.88235	2.76522	0.428999	64.8	1	7
						5.26316	32.2087	0.384581	58.1	1	8
						5.26316	5.25217	0.410654	60.5	1	9
						5.26316	2.76522	0.432272	64.3	1	10

## Sheet: Fig 6k-l
Fig 6k-l simulation synchrony
distirbution	two_sync	synchrony %	synchronized amplitude (nS)	conductance CV	CbN firing rate (spikes/s)	norm
0	smallest	7.40741	1.91304	0.336747	50.991	0.998316
0	largest	7.40741	51.6348	0.402158	61.588	1.20579
0	none	3.7037	0.904348	0.336362	51.077	1
1	smallest	7.14286	1.6	0.314316	47.447	1.00319
1	largest	7.14286	41.8087	0.363102	55.395	1.17124
1	none	3.57143	0.695652	0.314036	47.296	1
2	smallest	9.52381	2.92174	0.378241	57.78	1.00321
2	largest	9.52381	65.7391	0.465132	70.507	1.22419
2	none	4.7619	1.0087	0.377787	57.595	1
3	smallest	12.5	2.55652	0.469385	69.713	1.0064
3	largest	12.5	82.5913	0.58843	84.865	1.22513
3	none	6.25	1.0087	0.469117	69.27	1
4	smallest	10	2.95652	0.416449	62.841	0.99528
4	largest	10	70.5217	0.501949	75.078	1.18909
4	none	5	1.47826	0.4166	63.139	1
5	smallest	6.89655	0.591304	0.338546	51.734	1.00134
5	largest	6.89655	52.6435	0.399581	61.243	1.18539
5	none	3.44828	0.0521739	0.338994	51.665	1
6	smallest	8.69565	2.31304	0.342687	51.957	0.996051
6	largest	8.69565	52.487	0.406939	62.019	1.18895
6	none	4.34783	1.13043	0.342367	52.163	1
7	smallest	11.7647	2.85217	0.42083	63.14	0.999019
7	largest	11.7647	70.6261	0.513839	75.721	1.19808
7	none	5.88235	1.42609	0.420657	63.202	1
8	smallest	10.5263	1.65217	0.39056	59.183	1.00071
8	largest	10.5263	69.4609	0.495146	74.036	1.25186
8	none	5.26316	0.695652	0.390226	59.141	1
9	smallest	10.5263	1.04348	0.40757	61.901	1.00108
9	largest	10.5263	68.8	0.487572	73.167	1.18328
9	none	5.26316	0.13913	0.40798	61.834	1
10	smallest	10.5263	1.66957	0.432177	65.633	1.00347
10	largest	10.5263	82.0696	0.556423	82.164	1.25622
10	none	5.26316	0.53913	0.431845	65.406	1
11	smallest	7.69231	1.46087	0.302914	45.325	0.997689
11	largest	7.69231	37.8435	0.345589	52.587	1.15754
11	none	3.84615	0.695652	0.302803	45.43	1
12	smallest	10	1.3913	0.410485	62.424	1.00199
12	largest	10	70.5217	0.497502	74.61	1.19759
12	none	5	0.695652	0.410211	62.3	1
13	smallest	9.09091	2.67826	0.337027	50.781	0.995804
13	largest	9.09091	47.8783	0.390683	59.467	1.16613
13	none	4.54545	1.13043	0.336928	50.995	1
14	smallest	10.5263	2.53913	0.440459	67.053	1.00019
14	largest	10.5263	87.6696	0.583125	85.723	1.27868
14	none	5.26316	0.904348	0.440412	67.04	1
15	smallest	7.69231	1.86087	0.402556	61.75	1.00073
15	largest	7.69231	74.5043	0.505722	76.358	1.23747
15	none	3.84615	0.904348	0.401995	61.705	1
16	smallest	6.89655	1.86087	0.383882	59.075	1.0009
16	largest	6.89655	66.1217	0.457058	70.17	1.18888
16	none	3.44828	0.53913	0.384285	59.022	1
17	smallest	7.40741	1.94783	0.295351	44.195	1.00617
17	largest	7.40741	34.4696	0.330363	50.424	1.14798
17	none	3.7037	0.765217	0.294891	43.924	1
18	smallest	5.71429	1.82609	0.278292	41.445	1.00351
18	largest	5.71429	38.1391	0.324465	49.865	1.20738
18	none	2.85714	0.695652	0.277898	41.3	1
19	smallest	7.69231	2.67826	0.290167	43.437	1.00398
19	largest	7.69231	33.8609	0.325633	49.48	1.14365
19	none	3.84615	1.13043	0.289697	43.265	1
20	smallest	8.33333	1.70435	0.30126	44.879	0.999866
20	largest	8.33333	36.0522	0.339648	51.529	1.14802
20	none	4.16667	0.695652	0.301102	44.885	1
21	smallest	8.69565	2.13913	0.353708	53.877	1.00229
21	largest	8.69565	55.1652	0.420487	64.039	1.19133
21	none	4.34783	1.0087	0.353873	53.754	1
22	smallest	5.88235	1.46087	0.295119	44.765	1.00519
22	largest	5.88235	48.1739	0.363049	56.203	1.26202
22	none	2.94118	0.695652	0.294949	44.534	1
23	smallest	8	1.66957	0.361327	55.331	0.998538
23	largest	8	64.9217	0.46131	70.189	1.26668
23	none	4	0.765217	0.361295	55.412	1
24	smallest	10	2.03478	0.408381	62.103	1.003
24	largest	10	70.5217	0.494765	74.171	1.19791
24	none	5	0.904348	0.408012	61.917	1
25	smallest	10.5263	2.24348	0.380853	57.617	0.997732
25	largest	10.5263	61.3391	0.463088	69.528	1.20399
25	none	5.26316	0.765217	0.380549	57.748	1
26	smallest	7.40741	1.66957	0.336759	51.49	0.999864
26	largest	7.40741	56.2609	0.416885	63.865	1.24017
26	none	3.7037	0.765217	0.337226	51.497	1
27	smallest	8.33333	1.87826	0.329214	49.724	0.997292
27	largest	8.33333	48.2261	0.384234	58.613	1.17558
27	none	4.16667	0.695652	0.328528	49.859	1
28	smallest	9.52381	1.30435	0.418626	63.577	1.00061
28	largest	9.52381	76.8348	0.535846	79.34	1.2487
28	none	4.7619	0.53913	0.418891	63.538	1
29	smallest	7.14286	1.07826	0.309595	46.928	0.999617
29	largest	7.14286	44.1913	0.365031	56.222	1.19759
29	none	3.57143	0.53913	0.309322	46.946	1
30	smallest	9.09091	1.53043	0.373882	56.777	1.0024
30	largest	9.09091	61.3391	0.457219	68.892	1.21629
30	none	4.54545	0.765217	0.373569	56.641	1
31	smallest	7.69231	2.13913	0.318342	48.156	0.994876
31	largest	7.69231	48.1739	0.382465	58.731	1.21335
31	none	3.84615	0.956522	0.318102	48.404	1
32	smallest	10	3.18261	0.389664	58.877	0.989579
32	largest	10	64.1913	0.468892	70.485	1.18468
32	none	5	1.54783	0.390116	59.497	1
33	smallest	9.09091	1.66957	0.363941	55.254	1.004
33	largest	9.09091	56.713	0.434076	65.595	1.1919
33	none	4.54545	0.765217	0.364064	55.034	1
34	smallest	7.69231	1.54783	0.36337	55.634	1.00548
34	largest	7.69231	64.9217	0.461829	69.872	1.2628
34	none	3.84615	0.53913	0.362834	55.331	1
35	smallest	10	2.6087	0.390297	59.367	1.00493
35	largest	10	69.4261	0.495068	74.062	1.25367
35	none	5	1.13043	0.389773	59.076	1
36	smallest	7.14286	1.46087	0.325786	49.538	0.997262
36	largest	7.14286	50.5565	0.39012	59.673	1.20129
36	none	3.57143	0.695652	0.326624	49.674	1
37	smallest	9.52381	2.45217	0.318097	47.613	0.998197
37	largest	9.52381	39.5652	0.362788	55.256	1.15843
37	none	4.7619	0.904348	0.318212	47.699	1
38	smallest	11.1111	1.3913	0.403488	61.065	1.00386
38	largest	11.1111	68.1739	0.495244	73.962	1.21588
38	none	5.55556	0.695652	0.40281	60.83	1
39	smallest	5	1.3913	0.284288	42.7	1.00572
39	largest	5	38.4522	0.328186	50.431	1.18781
39	none	2.5	0.695652	0.283989	42.457	1
40	smallest	7.40741	2.03478	0.313963	47.335	1.00887
40	largest	7.40741	38.0174	0.355091	54.143	1.15397
40	none	3.7037	0.904348	0.313013	46.919	1
41	smallest	14.2857	2.34783	0.404267	60.067	1.00292
41	largest	14.2857	61.7913	0.483752	71.465	1.19323
41	none	7.14286	0.904348	0.403833	59.892	1
42	smallest	14.2857	6.27826	0.394928	59.371	1.0054
42	largest	14.2857	64.9217	0.487049	72.378	1.22567
42	none	7.14286	1.0087	0.394525	59.052	1
43	smallest	10	2.74783	0.371387	56.636	1.0025
43	largest	10	64.9217	0.468555	70.756	1.25243
43	none	5	1.32174	0.371014	56.495	1
44	smallest	11.7647	1.77391	0.355451	53.022	0.998738
44	largest	11.7647	44.1913	0.40465	60.703	1.14342
44	none	5.88235	0.765217	0.35537	53.089	1
45	smallest	8.33333	1.8087	0.357118	54.095	0.993225
45	largest	8.33333	57.3565	0.430345	65.254	1.19811
45	none	4.16667	0.904348	0.358189	54.464	1
46	smallest	6.89655	2.13913	0.323566	49.423	1.00186
46	largest	6.89655	50.313	0.377017	58.066	1.17707
46	none	3.44828	0.956522	0.323248	49.331	1
47	smallest	7.69231	1.26957	0.353065	53.658	1.00196
47	largest	7.69231	56.8348	0.430038	65.26	1.21861
47	none	3.84615	0.504348	0.352679	53.553	1
48	smallest	8.69565	2.50435	0.42233	64.7	0.998888
48	largest	8.69565	83.1652	0.553898	82.415	1.27239
48	none	4.34783	1.18261	0.422391	64.772	1
49	smallest	6.66667	1.66957	0.332222	50.721	0.991128
49	largest	6.66667	55.6348	0.405009	62.286	1.21712
49	none	3.33333	0.765217	0.332689	51.175	1
50	smallest	7.40741	1.54783	0.375415	57.371	0.996388
50	largest	7.40741	62.4696	0.451271	68.637	1.19205
50	none	3.7037	0.53913	0.375707	57.579	1
51	smallest	8	2.08696	0.330134	50.178	0.999363
51	largest	8	50.5565	0.393693	60.305	1.20106
51	none	4	0.956522	0.33017	50.21	1
52	smallest	9.09091	1.46087	0.372066	56.319	0.993315
52	largest	9.09091	61.3391	0.456352	68.63	1.21045
52	none	4.54545	0.695652	0.372542	56.698	1
53	smallest	7.69231	1.66957	0.335048	51.312	1.00223
53	largest	7.69231	52.0522	0.393807	60.673	1.18507
53	none	3.84615	0.765217	0.335127	51.198	1
54	smallest	9.09091	1.87826	0.334005	50.318	1.00269
54	largest	9.09091	48.1739	0.39551	59.987	1.19536
54	none	4.54545	0.695652	0.333486	50.183	1
55	smallest	10	2.38261	0.405505	61.333	1.00198
55	largest	10	74.5043	0.521102	77.085	1.25931
55	none	5	0.904348	0.405018	61.212	1
56	smallest	7.69231	2.38261	0.36209	55.49	0.995265
56	largest	7.69231	62.4696	0.440113	67.641	1.2132
56	none	3.84615	0.904348	0.362078	55.754	1
57	smallest	6.06061	1.6	0.281217	41.761	0.998016
57	largest	6.06061	36.2957	0.322976	49.48	1.18249
57	none	3.0303	0.695652	0.280897	41.844	1
58	smallest	18.1818	12.9913	0.433659	64.326	1.00312
58	largest	18.1818	74.0522	0.538038	78.713	1.22747
58	none	9.09091	5.47826	0.430845	64.126	1
59	smallest	11.1111	1.77391	0.427293	64.278	1.00262
59	largest	11.1111	74.5043	0.525347	77.526	1.20927
59	none	5.55556	0.765217	0.42729	64.11	1
60	smallest	10	3.07826	0.350716	53.136	0.99921
60	largest	10	52.8174	0.416435	63.564	1.19531
60	none	5	1.44348	0.350976	53.178	1
61	smallest	8.69565	1.94783	0.379125	58.039	1.00002
61	largest	8.69565	70	0.487552	73.562	1.26748
61	none	4.34783	0.765217	0.379357	58.038	1
62	smallest	9.09091	1.23478	0.503603	75.069	0.999933
62	largest	9.09091	100.835	0.670878	94.985	1.26522
62	none	4.54545	0.53913	0.504077	75.074	1
63	smallest	11.1111	1.98261	0.442932	67.016	0.997752
63	largest	11.1111	87.6696	0.585135	85.845	1.27808
63	none	5.55556	0.53913	0.443418	67.167	1
64	smallest	8.33333	2.1913	0.325705	49.698	1.00803
64	largest	8.33333	48.4522	0.381778	58.513	1.18683
64	none	4.16667	1.0087	0.326038	49.302	1
65	smallest	6.89655	1.98261	0.293231	43.764	1.00247
65	largest	6.89655	38.487	0.338714	51.898	1.18879
65	none	3.44828	0.8	0.292671	43.656	1
66	smallest	10	1.65217	0.405956	61.077	0.99786
66	largest	10	65.4957	0.498099	74.372	1.21507
66	none	5	0.695652	0.405978	61.208	1
67	smallest	9.52381	1.53043	0.331675	49.974	0.99524
67	largest	9.52381	43.5478	0.382362	57.964	1.15436
67	none	4.7619	0.765217	0.332441	50.213	1
68	smallest	6.25	1.86087	0.306411	46.268	0.999223
68	largest	6.25	48.1739	0.371895	57.315	1.2378
68	none	3.125	0.904348	0.306732	46.304	1
69	smallest	7.69231	1.91304	0.309061	46.41	1.00041
69	largest	7.69231	44.1913	0.364243	55.661	1.19982
69	none	3.84615	0.904348	0.308861	46.391	1
70	smallest	10	1.72174	0.43941	66.424	1.00124
70	largest	10	82.5913	0.564226	82.685	1.24634
70	none	5	0.53913	0.439232	66.342	1
71	smallest	8.33333	1.46087	0.426342	65.157	1.00217
71	largest	8.33333	83.1652	0.556204	82.582	1.27018
71	none	4.16667	0.695652	0.426098	65.016	1
72	smallest	9.52381	1.66957	0.378765	57.471	0.999513
72	largest	9.52381	67.3043	0.48071	72.083	1.25364
72	none	4.7619	0.765217	0.378757	57.499	1
73	smallest	11.7647	5.30435	0.395433	59.86	1.00292
73	largest	11.7647	63.5478	0.470868	70.592	1.18272
73	none	5.88235	2.53913	0.394744	59.686	1
74	smallest	8	2.45217	0.330699	50.236	1.00382
74	largest	8	50.087	0.391845	60.578	1.21047
74	none	4	1.13043	0.330078	50.045	1
75	smallest	9.52381	2.88696	0.416546	63.571	0.998398
75	largest	9.52381	81.3391	0.548291	81.511	1.28015
75	none	4.7619	1.44348	0.416532	63.673	1
76	smallest	9.52381	2.1913	0.425538	65.05	1.00037
76	largest	9.52381	82.9565	0.554785	82.305	1.26572
76	none	4.7619	1.0087	0.425405	65.026	1
77	smallest	7.14286	1.54783	0.287847	42.746	0.987822
77	largest	7.14286	33.1304	0.322952	49.178	1.13646
77	none	3.57143	0.53913	0.288389	43.273	1
78	smallest	10.5263	1.44348	0.418615	62.858	1.00959
78	largest	10.5263	68.1739	0.507573	74.955	1.20388
78	none	5.26316	0.53913	0.418171	62.261	1
79	smallest	11.1111	1.3913	0.421811	63.159	1.00065
79	largest	11.1111	73.7913	0.531488	78.046	1.23651
79	none	5.55556	0.695652	0.421461	63.118	1
80	smallest	8.69565	1.72174	0.358789	54.485	1.00648
80	largest	8.69565	56.8348	0.4352	66.087	1.2208
80	none	4.34783	0.53913	0.358206	54.134	1
81	smallest	9.52381	2.4	0.324508	48.869	1.00676
81	largest	9.52381	39.5652	0.368431	55.93	1.15222
81	none	4.7619	0.765217	0.323914	48.541	1
82	smallest	10.5263	1.49565	0.397756	59.927	0.993781
82	largest	10.5263	64.1913	0.476316	71.193	1.18061
82	none	5.26316	0.53913	0.398291	60.302	1
83	smallest	16.6667	5.18261	0.50169	74.091	0.995258
83	largest	16.6667	100.835	0.670286	94.565	1.27028
83	none	8.33333	2.41739	0.50216	74.444	1
84	smallest	7.69231	1.44348	0.316683	47.721	0.998034
84	largest	7.69231	42.4696	0.366555	56.1	1.17327
84	none	3.84615	0.53913	0.316484	47.815	1
85	smallest	7.14286	1.3913	0.337941	51.346	0.996507
85	largest	7.14286	52.8522	0.406384	62.122	1.20564
85	none	3.57143	0.695652	0.338635	51.526	1
86	smallest	7.69231	1.23478	0.31056	46.652	0.997712
86	largest	7.69231	39.6696	0.354465	53.842	1.15148
86	none	3.84615	0.53913	0.310367	46.759	1
87	smallest	9.09091	2.1913	0.398524	60.184	0.989868
87	largest	9.09091	70	0.503152	75.255	1.23775
87	none	4.54545	1.0087	0.399084	60.8	1
88	smallest	6.66667	1.07826	0.32762	49.828	0.994968
88	largest	6.66667	52.2783	0.39666	60.957	1.21719
88	none	3.33333	0.53913	0.327499	50.08	1
89	smallest	9.52381	2.08696	0.416569	63.531	0.996205
89	largest	9.52381	81.3391	0.547294	81.315	1.27507
89	none	4.7619	0.765217	0.415908	63.773	1
90	smallest	11.1111	2.74783	0.439773	66.343	0.999036
90	largest	11.1111	83.1652	0.566404	83.186	1.25267
90	none	5.55556	1.32174	0.439935	66.407	1
91	smallest	9.52381	2.01739	0.377372	57.318	0.998763
91	largest	9.52381	62	0.45125	68.347	1.19094
91	none	4.7619	1.0087	0.377493	57.389	1
92	smallest	8	1.30435	0.400815	61.202	0.999984
92	largest	8	69.8783	0.485959	73.441	1.19996
92	none	4	0.53913	0.400485	61.203	1
93	smallest	9.52381	2.66087	0.374997	57.037	1.00317
93	largest	9.52381	64.9217	0.471217	70.917	1.24729
93	none	4.7619	1.18261	0.375458	56.857	1
94	smallest	8	1.72174	0.317579	47.701	0.997741
94	largest	8	39.5652	0.361741	55.092	1.15234
94	none	4	0.53913	0.317657	47.809	1
95	smallest	7.14286	1.25217	0.36714	56.42	1.004
95	largest	7.14286	63.5478	0.447794	68.135	1.21247
95	none	3.57143	0.243478	0.366763	56.195	1
96	smallest	10.5263	2.13913	0.411578	61.943	0.998163
96	largest	10.5263	74.5043	0.52613	77.688	1.25188
96	none	5.26316	1.0087	0.412016	62.057	1
97	smallest	11.1111	2.64348	0.374672	56.943	0.999351
97	largest	11.1111	65.4957	0.472506	71.277	1.25091
97	none	5.55556	1.0087	0.374825	56.98	1
98	smallest	9.09091	2.26087	0.383207	58.173	1.00732
98	largest	9.09091	62.6087	0.471243	70.734	1.22483
98	none	4.54545	1.13043	0.382462	57.75	1
99	smallest	6.25	1.86087	0.288453	43.264	1.0006
99	largest	6.25	38.887	0.332454	50.899	1.17718
99	none	3.125	0.904348	0.288549	43.238	1
