# Supplementary material for: Implications of variable synaptic weights for rate and temporal coding of cerebellar outputs
Source: eLife. 2024 Jan 19;13:e89095. doi: 10.7554/eLife.89095 (PMC10798666; doi:10.7554/eLife.89095)
Supplement: Figure 7—source data 1. [file elife-89095-fig7-data1.xlsx]

## Sheet: Fig 7a-d
Fig 7a-d synchrony cross-correlogram
	uniform 40 x 5 nS										all sml					all small											all medium											all large
	0% synchrony			25% synchrony			50% synchrony					50% synchrony					0% synchrony			25% synchrony			50% synchrony					0% synchrony			25% synchrony			50% synchrony					0% synchrony
cell	excitation (norm)	inhibition (norm)	half width (ms)	excitation (norm)	inhibition (norm)	half width (ms)	excitation (norm)	inhibition (norm)	half width (ms)		cell	excitation (norm)	inhibition (norm)	half width (ms)		cell	excitation (norm)	inhibition (norm)	half width (ms)	excitation (norm)	inhibition (norm)	half width (ms)	excitation (norm)	inhibition (norm)	half width (ms)		cell	excitation (norm)	inhibition (norm)	half width (ms)	excitation (norm)	inhibition (norm)	half width (ms)	excitation (norm)	inhibition (norm)	half width (ms)		cell	excitation (norm)	inhibition (norm)	half width (ms)
1	1.1852	0.357112	1.41566	1.93546	0	4.92841	1.66163	0	5.94768		1	1.94759	0	5.67811		1	1.05482	0.732351	1.7961	1.16248	0.0903706	2.04811	1.39684	0	3.18087		1	1.38582	0.142946	2.28411	1.53872	0	2.99127	2.04297	0	4.34622		1	1.45336	0	3.54253
2	1.18467	0.450328	1.94379	1.52978	0	4.31059	1.5028	0	5.30031		2	1.99766	0	5.93762		2	1.13356	0.602781	1.33652	1.48008	0.128844	1.60171	1.13239	0	2.63396		2	1.28926	0.0443602	2.058	1.27992	0	2.68015	1.62441	0	3.74858		2	1.34699	0	3.64055
3	1.27007	0.371768	2.4267	2.23144	0	5.43998	1.85689	0	6.18491		3	2.02054	0	6.39758		3	1.03222	0.697665	2.01239	1.24881	0.111849	1.61464	0.913647	0	3.11992		3	1.22457	0.12591	2.90601	1.53401	0	3.31245	1.6903	0	4.47335		3	1.78355	0	4.20717
4	1.22614	0.343861	1.82154	1.75185	0	5.36652	2.34003	0	6.16452		4	1.8909	0	5.81271		4	1.09291	0.598321	1.19744	1.70777	0.0960635	2.11173	1.42655	0	3.71615		4	1.48328	0.0182729	2.03516	0.667674	0	3.68131	1.30122	0	4.45543		4	1.34089	0	3.70458
5	1.14287	0.432603	2.46689	1.76569	0	5.98925	2.02321	0	7.02414		5	2.15333	0	5.93637		5	1.10127	0.65335	1.3414	1.09192	0.121871	2.24251	0.886441	0	3.47235		5	1.36193	0.110585	2.36042	1.14761	0	3.35547	1.71644	0	4.58935		5	1.37816	0	3.87079
6	1.21557	0.25984	2.16039	2.37471	0	6.14041	2.27387	0	6.47589		6	1.66905	0	5.58293		6	1.11343	0.63994	1.39279	1.20854	0	1.54928	1.38986	0	3.50894		6	1.25285	0.0613507	1.98282	0.90202	0	2.94991	1.61995	0	4.86549		6	1.6388	0	3.63462
7	1.28294	0.365144	2.3275	1.85677	0	5.46637	1.35856	0	6.62851		7	1.61476	0	4.89253		7	1.08965	0.632446	1.45482								7	1.1754	0.113125	2.04368								7	1.22428	0	3.35367
8	1.14186	0.336913	2.09969	2.16758	0	4.95612	1.80554	0	6.05339		8	1.63848	0	4.97795		8	1.06011	0.65655	1.46311								8	1.34949	0.0703446	1.98181								8	1.34559	0	3.29677
9	1.17627	0.409999	2.26242	1.79771	0	4.55818	1.93581	0	5.20485		9	1.86479	0	5.84767		9	1.12721	0.683805	1.50523								9	1.20182	0.0931116	2.04927								9	1.74452	0	3.69259
10	1.15984	0.339874	1.93127	1.90035	0	4.47172	2.13148	0	5.36501
11	1.14358	0.443487	2.27692	1.90743	0	5.16881	1.89634	0	5.99225		mean	1.86635	0	5.67372		mean	1.08946	0.655245	1.49998	1.3166	0.0914998	1.86133	1.19096	0	3.27203		mean	1.30271	0.0866674	2.18903	1.17833	0	3.16176	1.66588	0	4.41307		mean	1.47291	0	3.66036
											sem	0.0628861	0	0.158762		sem	0.0114462	0.0145834	0.0840448	0.094911	0.0192574	0.124969	0.101738	0	0.156212		sem	0.03341	0.0136402	0.0999613	0.141983	0	0.145609	0.0969806	0	0.15135		sem	0.0665059	0	0.0903286
mean	1.19355	0.373721	2.10298	1.92898	0	5.16331	1.88965	0	6.03104
sem	0.0149888	0.0171181	0.093082	0.0731291	0	0.178792	0.0914935	0	0.171933

## Sheet: Fig 7e-f
Fig 7e-f simulation synchrony cross-correlogram
uniform 40 x 5 nS						variable sized input
synchrony %	synchrony amplitude	excitation (norm)	inhibition (norm)	half width (ms)		synchrony %	synchrony amplitude	excitation (norm)	inhibition (norm)	half width (ms)	distribution
2.5	5	1.22218	0.552016	3.2		10.7143	6.66087	1.15945	0.600037	2.6	1
5	10	1.41268	0.249496	3.7		28.5714	39.4609	1.63447	0.00599493	4.6	1
7.5	15	1.5656	0.0905596	4.2		64.2857	147.461	1.75947	0	6.6	1
10	20	1.66516	0.0296899	4.8		39.2857	77.1652	1.76934	8.38931e-05	6	1
12.5	25	1.72515	0.0112534	5.2		17.8571	30.2957	1.57957	0.0148476	4.2	1
15	30	1.76553	0.00516749	5.5		71.4286	152.539	1.75656	0	6.5	1
17.5	35	1.79825	0.00270398	5.8		75	168.591	1.74714	0	6.6	1
20	40	1.8095	0.00150811	6		28.5714	71.7565	1.75168	0.000159783	5.8	1
22.5	45	1.82065	0.000722599	6.1		28.5714	41.2696	1.66297	0.00444046	4.8	1
25	50	1.82308	0.000437477	6.3		85.7143	167.548	1.7485	0	6.6	1
27.5	55	1.8279	0.000189311	6.4		67.8571	120.713	1.75955	0	6.2	1
30	60	1.82873	0.000126388	6.4		75	160.087	1.75641	0	6.7	1
32.5	65	1.82473	5.33304e-05	6.5		28.5714	59.5826	1.7431	0.000594649	5.5	1
35	70	1.82206	2.39874e-05	6.5		10.7143	13.3043	1.30478	0.288136	3	1
37.5	75	1.82173	1.62434e-05	6.6		42.8571	81.0261	1.76961	5.61613e-05	6	1
40	80	1.8179	1.44281e-05	6.6		7.14286	22.2435	1.4903	0.0577459	3.7	1
42.5	85	1.80894	9.81541e-07	6.6		75	161.391	1.75028	0	6.6	1
45	90	1.80737	0	6.7		82.1429	162.417	1.74876	0	6.5	1
47.5	95	1.80388	9.06826e-07	6.7		53.5714	137.426	1.76322	0	6.6	1
50	100	1.79907	0	6.7		28.5714	37.8261	1.63765	0.0064176	4.6	1
52.5	105	1.79679	8.45532e-07	6.7		32.1429	46.4348	1.68971	0.00268834	5	1
55	110	1.79291	0	6.7		82.1429	172.504	1.74627	0	6.6	1
57.5	115	1.78663	0	6.7		28.5714	44.0696	1.66792	0.00383744	4.8	1
60	120	1.7818	0	6.7		10.7143	23.7217	1.49238	0.0478012	3.7	1
62.5	125	1.77645	0	6.7		85.7143	172.261	1.75038	0	6.6	1
65	130	1.77475	0	6.7		85.7143	177.113	1.74436	0	6.6	1
67.5	135	1.77032	0	6.7		42.8571	68.8696	1.76174	0.000196883	5.8	1
70	140	1.76807	0	6.7		53.5714	118.417	1.76723	0	6.4	1
72.5	145	1.76618	0	6.7		7.14286	25.8783	1.54023	0.0276995	3.9	1
75	150	1.76262	0	6.7		50	99.687	1.7661	4.37714e-06	6.1	1
77.5	155	1.75794	0	6.7		28.5714	47.9826	1.69472	0.00227753	5.1	1
80	160	1.75442	0	6.7		57.1429	129.461	1.76728	0	6.6	1
82.5	165	1.75254	0	6.7		32.1429	95.8957	1.77449	6.2926e-06	6.2	1
85	170	1.75157	0	6.7		64.2857	145.67	1.76218	0	6.6	1
87.5	175	1.7455	0	6.7		17.8571	34.2783	1.61138	0.00901542	4.4	1
90	180	1.74356	0	6.7		64.2857	132.157	1.76153	0	6.4	1
92.5	185	1.74539	0	6.7		57.1429	125.983	1.76749	0	6.5	1
95	190	1.73874	0	6.7		53.5714	86.2435	1.75712	5.46228e-05	5.9	1
97.5	195	1.74013	0	6.7		78.5714	175.165	1.7487	0	6.7	1
100	200	1.73664	0	6.7		89.2857	193.878	1.73961	0	6.7	1
						64.2857	133.843	1.76163	0	6.4	1
						92.8571	182.104	1.74207	0	6.7	1
						14.2857	51.5826	1.72191	0.00134361	5.3	1
						46.4286	97.2174	1.7741	6.24154e-06	6.2	1
						25	66.887	1.75599	0.000276166	5.7	1
						39.2857	100.104	1.77307	4.37831e-06	6.2	1
						85.7143	160.365	1.74764	0	6.5	1
						35.7143	75.4087	1.7635	0.000111149	5.9	1
						60.7143	156.33	1.75362	0	6.7	1
						25	50.2609	1.70308	0.0016997	5.2	1
						78.5714	131.496	1.76324	0	6.4	1
						64.2857	108.678	1.76408	0	6.2	1
						64.2857	161.2	1.75108	0	6.7	1
						46.4286	98.8522	1.77313	8.82844e-06	6.2	1
						60.7143	96.3652	1.76519	1.88009e-05	6	1
						7.14286	17.5826	1.40358	0.140433	3.3	1
						82.1429	164.209	1.74783	0	6.5	1
						17.8571	57.287	1.74298	0.000664691	5.5	1
						28.5714	63.8783	1.75975	0.000350489	5.7	1
						28.5714	76.4522	1.77319	7.41408e-05	6	1
						67.8571	150.626	1.75868	0	6.6	1
						82.1429	177.965	1.74495	0	6.7	1
						92.8571	197.287	1.73752	0	6.7	1
						75	153.443	1.75894	0	6.6	1
						85.7143	183.722	1.74299	0	6.7	1
						71.4286	141.391	1.76004	0	6.5	1
						92.8571	182.73	1.74202	0	6.7	1
						14.2857	16.0348	1.36341	0.19774	3.2	1
						85.7143	153.426	1.7554	0	6.5	1
						71.4286	160.748	1.75268	0	6.7	1
						14.2857	8.8	1.20901	0.48886	2.8	1
						14.2857	15.287	1.35415	0.21293	3.1	1
						50	89.7217	1.7734	3.67462e-05	6.1	1
						85.7143	170.174	1.74807	0	6.6	1
						67.8571	142.209	1.75925	0	6.5	1
						17.8571	30.6435	1.58811	0.0130511	4.3	1
						85.7143	154.087	1.75238	0	6.4	1
						67.8571	148.452	1.75862	0	6.6	1
						75	157.27	1.75288	0	6.6	1
						82.1429	166.035	1.74758	0	6.6	1
						25	73.0087	1.77131	0.000106535	6	1
						92.8571	178.73	1.74323	0	6.6	1
						57.1429	88.8696	1.76075	3.20138e-05	6	1
						7.14286	3.23478	1.07873	0.796853	2.6	1
						60.7143	117.965	1.76772	0	6.3	1
						57.1429	114.696	1.77357	0	6.4	1
						89.2857	181.113	1.74215	0	6.7	1
						42.8571	80.8348	1.764	5.99989e-05	6	1
						92.8571	184.748	1.74197	0	6.6	1
						25	48	1.69815	0.00222245	5.1	1
						85.7143	189.652	1.74183	0	6.7	1
						82.1429	159.809	1.74939	0	6.5	1
						82.1429	167.061	1.75083	0	6.6	1
						28.5714	61.913	1.74878	0.000486742	5.6	1
						78.5714	170.139	1.74819	0	6.7	1
						7.14286	3.09565	1.07443	0.803055	2.6	1
						57.1429	112.574	1.75841	1.62157e-06	6.2	1
						89.2857	177.061	1.74596	0	6.6	1
						82.1429	177.757	1.74482	0	6.7	1
						71.4286	163.391	1.75358	0	6.7	2
						33.3333	46.4522	1.60824	0.00381306	4.5	2
						23.8095	21.1826	1.37809	0.101645	3	2
						52.381	76.2957	1.70334	0.00026625	5.4	2
						66.6667	103.93	1.72433	1.24971e-05	5.7	2
						90.4762	186.452	1.74136	0	6.7	2
						42.8571	83.1478	1.7152	0.000110548	5.6	2
						23.8095	32.313	1.50925	0.0151224	3.7	2
						14.2857	24.2087	1.42422	0.0559219	3.2	2
						14.2857	48.7478	1.6489	0.00207344	4.9	2
						38.0952	65.4783	1.68281	0.000588486	5.2	2
						47.619	97.4783	1.76836	1.24605e-05	6.1	2
						52.381	141.548	1.76571	0	6.7	2
						80.9524	175.426	1.74531	0	6.7	2
						9.52381	51.7391	1.73329	0.00115778	5.4	2
						38.0952	68.2609	1.68972	0.000490045	5.3	2
						76.1905	171.113	1.74841	0	6.6	2
						38.0952	75.3913	1.70373	0.000265976	5.4	2
						76.1905	168.348	1.75274	0	6.7	2
						19.0476	29.0957	1.47683	0.0241647	3.6	2
						90.4762	185.948	1.74302	0	6.7	2
						52.381	148.191	1.76273	0	6.7	2
						28.5714	68.5217	1.76011	0.000236483	5.8	2
						85.7143	163.687	1.74916	0	6.5	2
						57.1429	66.2957	1.67093	0.000857525	5	2
						61.9048	158.73	1.75577	0	6.7	2
						19.0476	23.5304	1.4132	0.0643713	3.2	2
						85.7143	182	1.74315	0	6.7	2
						38.0952	111.496	1.77541	0	6.4	2
						38.0952	47.0609	1.61124	0.00393939	4.5	2
						57.1429	115.496	1.76443	0	6.2	2
						42.8571	100.713	1.76772	4.34971e-06	6.2	2
						66.6667	143.009	1.75892	0	6.5	2
						76.1905	158.452	1.75134	0	6.5	2
						76.1905	132.226	1.73404	0	6.1	2
						42.8571	94.8	1.77055	9.06437e-06	6.1	2
						47.619	66.713	1.6768	0.00067679	5.1	2
						66.6667	100.557	1.72116	2.71194e-05	5.7	2
						28.5714	39.913	1.57022	0.00688412	4.2	2
						23.8095	41.6348	1.59771	0.00505802	4.4	2
						66.6667	139.687	1.75939	0	6.4	2
						28.5714	64.2261	1.69269	0.00050566	5.3	2
						76.1905	169.843	1.74903	0	6.7	2
						19.0476	30.0522	1.50114	0.0183752	3.7	2
						23.8095	42.7478	1.59917	0.00482741	4.4	2
						52.381	127.965	1.76885	0	6.5	2
						47.619	131.513	1.77154	0	6.6	2
						42.8571	64.1391	1.68216	0.000747909	5.1	2
						47.619	84.4348	1.71797	7.71033e-05	5.6	2
						76.1905	159.391	1.75266	0	6.6	2
						66.6667	108.557	1.72662	4.07315e-06	5.8	2
						66.6667	101.757	1.72289	2.19178e-05	5.7	2
						61.9048	100.417	1.72468	2.54621e-05	5.7	2
						76.1905	165.739	1.75017	0	6.7	2
						28.5714	52.8522	1.66145	0.00167782	4.9	2
						33.3333	68.1217	1.7578	0.000253093	5.7	2
						52.381	104.591	1.77168	3.40324e-06	6.3	2
						71.4286	171.478	1.74833	0	6.7	2
						57.1429	115.826	1.76683	0	6.4	2
						33.3333	75.3043	1.7654	0.000110178	5.9	2
						57.1429	115.513	1.77214	0	6.3	2
						42.8571	86.6609	1.76225	4.97242e-05	6	2
						33.3333	93.9478	1.7791	8.22363e-06	6.2	2
						76.1905	172.991	1.74671	0	6.7	2
						42.8571	59.3913	1.65454	0.00135971	4.9	2
						9.52381	4.33043	1.08406	0.746238	2.3	2
						38.0952	49.1652	1.62005	0.00330975	4.5	2
						80.9524	165.391	1.74898	0	6.6	2
						14.2857	50.713	1.72846	0.00142749	5.4	2
						61.9048	102.504	1.72305	1.76303e-05	5.7	2
						47.619	74.4522	1.69248	0.000431475	5.2	2
						80.9524	156.765	1.75122	0	6.5	2
						19.0476	34.5217	1.54551	0.0103746	4	2
						47.619	63.5652	1.67531	0.000805594	5.1	2
						66.6667	132.748	1.76234	0	6.4	2
						28.5714	33.6522	1.52077	0.0133778	3.8	2
						14.2857	55.9304	1.73753	0.000810441	5.5	2
						80.9524	171.948	1.74578	0	6.7	2
						42.8571	49.0609	1.61621	0.00346493	4.5	2
						14.2857	20.7652	1.37284	0.105234	3	2
						52.381	120	1.77208	0	6.4	2
						9.52381	7.3913	1.14382	0.584328	2.4	2
						52.381	62.6087	1.66305	0.00113771	4.9	2
						9.52381	15.4087	1.29193	0.237899	2.7	2
						61.9048	96.2957	1.72146	4.07459e-05	5.7	2
						47.619	81.0783	1.71074	0.000160949	5.5	2
						38.0952	88.8348	1.77599	1.13554e-05	6.2	2
						52.381	83.3565	1.70425	0.000139818	5.5	2
						28.5714	108.591	1.78066	0	6.5	2
						23.8095	47.0957	1.62455	0.00315172	4.6	2
						19.0476	23.2348	1.40645	0.069588	3.1	2
						9.52381	14.6261	1.27857	0.266593	2.6	2
						61.9048	120.33	1.76627	0	6.3	2
						33.3333	92.1913	1.77986	1.10869e-05	6.2	2
						42.8571	62.0174	1.67457	0.000899789	5	2
						57.1429	85.1652	1.70641	0.000147618	5.4	2
						19.0476	35.1304	1.54828	0.00935494	4	2
						42.8571	108.817	1.77845	8.29541e-07	6.4	2
						14.2857	17.0087	1.31315	0.192604	2.8	2
						71.4286	141.583	1.75909	0	6.5	2
						56.25	110.8	1.7192	3.9883e-06	5.8	3
						62.5	93.7565	1.70042	0.000100678	5.4	3
						31.25	54.0348	1.59096	0.00326554	4.3	3
						43.75	115.078	1.71654	1.56049e-06	5.8	3
						25	39.1652	1.49915	0.0113075	3.7	3
						25	18.3652	1.25428	0.273207	2.4	3
						43.75	137.13	1.75021	0	6.3	3
						50	137.287	1.76146	0	6.4	3
						87.5	185.252	1.74043	0	6.7	3
						68.75	141.67	1.74913	0	6.2	3
						43.75	50.9217	1.54718	0.00541722	3.9	3
						68.75	128.957	1.73836	0	6	3
						12.5	47.8783	1.56036	0.0050677	4.1	3
						50	114.383	1.71598	1.56799e-06	5.8	3
						18.75	67.6696	1.68615	0.000606007	5.1	3
						25	22.5913	1.31094	0.155051	2.5	3
						31.25	56.6261	1.59665	0.00274882	4.4	3
						62.5	106.383	1.73243	8.33443e-06	5.7	3
						18.75	20.9739	1.28988	0.193874	2.5	3
						43.75	110.452	1.74453	2.45085e-06	6	3
						62.5	125.426	1.72103	7.47432e-07	5.9	3
						12.5	21.113	1.2957	0.176038	2.5	3
						81.25	179.27	1.74428	0	6.6	3
						50	121.113	1.71768	7.60159e-07	5.9	3
						37.5	43.6	1.51	0.00925718	3.7	3
						31.25	86.3652	1.67803	0.000195654	5.2	3
						68.75	93.6696	1.68186	0.000159511	5.2	3
						68.75	185.6	1.74061	0	6.7	3
						50	169.061	1.74949	0	6.7	3
						68.75	138.661	1.74829	0	6.2	3
						12.5	47.8783	1.56621	0.0050753	4.1	3
						18.75	67.9826	1.64546	0.000931892	4.8	3
						43.75	123.217	1.74987	0	6.2	3
						50	108.348	1.74855	5.79474e-06	5.9	3
						18.75	36.9043	1.48363	0.0137756	3.5	3
						43.75	107.913	1.71436	1.13047e-05	5.7	3
						56.25	100.035	1.7078	2.85095e-05	5.6	3
						81.25	149.496	1.74536	0	6.3	3
						31.25	121.2	1.7649	0	6.3	3
						87.5	166.278	1.74438	0	6.4	3
						25	50.4348	1.57275	0.00418444	4.2	3
						81.25	119.948	1.73606	0	5.8	3
						56.25	74.4522	1.65152	0.000756162	4.8	3
						18.75	5.87826	1.08249	0.742174	2.2	3
						75	81.6	1.66292	0.000545431	4.9	3
						43.75	45.6174	1.5214	0.00779846	3.8	3
						18.75	20.0348	1.28014	0.218688	2.5	3
						81.25	134.122	1.72325	0	6	3
						68.75	146.765	1.75103	0	6.3	3
						56.25	152.07	1.74933	0	6.4	3
						68.75	145.183	1.74723	0	6.3	3
						18.75	68.2261	1.68766	0.000651626	5.1	3
						25	6.57391	1.09262	0.712822	2.2	3
						87.5	183.148	1.74299	0	6.7	3
						50	156.104	1.75398	0	6.6	3
						87.5	172.8	1.74598	0	6.6	3
						18.75	18.1739	1.25012	0.277652	2.4	3
						37.5	38.313	1.46414	0.0155588	3.4	3
						75	147.722	1.75476	0	6.4	3
						25	20.2783	1.27634	0.217676	2.5	3
						43.75	109.374	1.744	4.93087e-06	6	3
						25	52.1913	1.57843	0.00382904	4.2	3
						87.5	147.478	1.72409	0	6.1	3
						50	170.591	1.75019	0	6.7	3
						81.25	195.53	1.73843	0	6.7	3
						25	11.2174	1.15689	0.526575	2.3	3
						75	128.73	1.72236	0	5.9	3
						25	40.1217	1.48565	0.011674	3.5	3
						62.5	116.226	1.71765	7.77626e-07	5.8	3
						31.25	71.6522	1.69183	0.000576582	5.1	3
						56.25	111.704	1.74556	1.62408e-06	6	3
						56.25	105.617	1.70924	1.1433e-05	5.6	3
						81.25	133.739	1.73749	0	6	3
						31.25	15.3391	1.20934	0.379299	2.4	3
						12.5	15.4609	1.21665	0.367228	2.3	3
						31.25	23.913	1.32372	0.128625	2.6	3
						25	52.1913	1.58256	0.0038079	4.2	3
						62.5	135.078	1.74868	0	6.2	3
						62.5	93.287	1.70232	0.000108603	5.4	3
						56.25	108.904	1.7453	4.94313e-06	5.9	3
						75	158.73	1.75264	0	6.5	3
						50	60.6261	1.61829	0.00209714	4.5	3
						81.25	181.617	1.74732	0	6.7	3
						25	59.6348	1.6616	0.00159705	4.8	3
						18.75	9.87826	1.13805	0.578914	2.2	3
						81.25	151.357	1.74524	0	6.3	3
						68.75	126.974	1.74966	0	6.1	3
						56.25	123.096	1.75256	1.53574e-06	6.1	3
						50	71.513	1.64348	0.000894849	4.8	3
						50	73.8957	1.64955	0.000745858	4.8	3
						75	173.617	1.74338	0	6.6	3
						56.25	116.243	1.74082	0	5.9	3
						50	97.9826	1.70491	3.46958e-05	5.6	3
						31.25	42.1043	1.52024	0.00863915	3.8	3
						31.25	27.6	1.3652	0.071104	2.8	3
						81.25	166.696	1.7497	0	6.6	3
						75	140.783	1.72517	0	6.1	3
						50	108.609	1.73565	5.75906e-06	5.8	3
						37.5	85.9652	1.71673	0.00016977	5.4	3
						68.75	96.9913	1.70215	7.40214e-05	5.4	3
						15	20.8696	1.34483	0.121271	2.9	4
						55	110.643	1.76287	1.6401e-06	6.2	4
						15	18.9391	1.31366	0.172649	2.7	4
						30	90.0696	1.76687	2.8044e-05	6.1	4
						70	109.13	1.71276	9.64595e-06	5.6	4
						35	99.4435	1.76569	8.78032e-06	6.1	4
						65	82.4696	1.68852	0.000258128	5.3	4
						50	93.5478	1.76256	2.55544e-05	6	4
						50	58.4522	1.62894	0.00200793	4.7	4
						30	53.2	1.61817	0.00240942	4.6	4
						90	165.53	1.74927	0	6.5	4
						10	9.8087	1.16623	0.505386	2.4	4
						65	80.4	1.6835	0.000294302	5.2	4
						65	150.504	1.75425	0	6.5	4
						75	138.87	1.76083	0	6.4	4
						80	161.6	1.7498	0	6.5	4
						10	24	1.38384	0.0720647	3	4
						90	194.191	1.74143	0	6.7	4
						45	120.643	1.76221	0	6.3	4
						40	73.2522	1.67557	0.00047603	5.1	4
						75	184.122	1.74317	0	6.7	4
						60	144.157	1.75967	0	6.5	4
						20	25.5652	1.40002	0.0587168	3.1	4
						25	37.4783	1.52104	0.0104558	3.8	4
						90	166.609	1.74905	0	6.5	4
						20	35.6522	1.50658	0.0116714	3.8	4
						15	27.3565	1.42426	0.0403634	3.2	4
						50	89.9304	1.70142	7.15123e-05	5.5	4
						55	116.017	1.76351	7.95547e-07	6.3	4
						50	94	1.70201	6.91494e-05	5.5	4
						75	170.435	1.74902	0	6.7	4
						35	96.8174	1.76897	8.93483e-06	6.1	4
						60	90.0348	1.70021	0.000107654	5.4	4
						70	96.6087	1.70452	6.32042e-05	5.5	4
						50	90.2261	1.70131	7.76158e-05	5.5	4
						75	187.704	1.74428	0	6.7	4
						35	126.522	1.76977	0	6.5	4
						90	197.043	1.73711	0	6.7	4
						45	115.548	1.7674	0	6.3	4
						25	94.887	1.77221	8.15638e-06	6.2	4
						40	72.713	1.67596	0.000440051	5.2	4
						20	44.713	1.57905	0.00489225	4.3	4
						65	164.243	1.75159	0	6.6	4
						45	76.2783	1.68128	0.000327138	5.2	4
						40	117.93	1.76757	0	6.4	4
						15	67.3739	1.74875	0.000258956	5.7	4
						15	64.3826	1.74002	0.000462915	5.6	4
						70	157.061	1.75347	0	6.6	4
						25	30.6957	1.45547	0.02449	3.4	4
						75	160.591	1.7529	0	6.5	4
						80	175.861	1.74691	0	6.6	4
						60	114.261	1.72072	7.84711e-07	5.9	4
						35	60.8522	1.64487	0.00130067	4.9	4
						35	49.0783	1.58679	0.00400983	4.3	4
						15	32.2261	1.48022	0.0174167	3.6	4
						35	46.6783	1.578	0.00483751	4.3	4
						55	106.4	1.76226	5.04807e-06	6.1	4
						80	160.313	1.74927	0	6.5	4
						35	83.513	1.75785	6.17125e-05	5.9	4
						65	131.583	1.76188	0	6.4	4
						20	15.2	1.2537	0.297955	2.6	4
						90	184.07	1.73997	0	6.7	4
						70	132.661	1.7598	0	6.4	4
						55	78.3652	1.68083	0.000332481	5.2	4
						60	113.461	1.71757	1.57534e-06	5.8	4
						75	161.67	1.74877	0	6.5	4
						30	51.113	1.60707	0.00314296	4.5	4
						85	184.678	1.74126	0	6.7	4
						45	74.6783	1.67488	0.000457901	5.1	4
						15	6.48696	1.10698	0.660902	2.3	4
						20	22.4	1.36214	0.0993633	2.9	4
						20	14.3826	1.24128	0.325557	2.5	4
						30	46.4348	1.58082	0.00458401	4.3	4
						90	131.67	1.71979	0	5.9	4
						20	34.313	1.50256	0.0133784	3.7	4
						80	142.661	1.72231	0	6.1	4
						80	124.157	1.71644	0	5.8	4
						50	101.513	1.76543	8.66822e-06	6.1	4
						65	145.235	1.75978	0	6.5	4
						80	180.087	1.74458	0	6.6	4
						40	44.6435	1.56037	0.00624504	4.1	4
						75	188.504	1.73993	0	6.7	4
						25	90.3826	1.7692	1.58737e-05	6.1	4
						85	134.835	1.72471	0	6	4
						85	174.957	1.74582	0	6.6	4
						15	6.92174	1.11681	0.639808	2.3	4
						70	109.2	1.71372	5.61837e-06	5.7	4
						55	79.4087	1.67618	0.000329356	5.2	4
						55	66.3652	1.65619	0.0010636	4.9	4
						40	101.878	1.76808	6.0467e-06	6.2	4
						50	88.6957	1.69625	0.000133464	5.4	4
						65	131.061	1.75955	0	6.3	4
						40	64.3304	1.65461	0.00099009	4.9	4
						70	162.07	1.75091	0	6.6	4
						85	170.974	1.74689	0	6.6	4
						50	96.6609	1.70571	3.57415e-05	5.6	4
						70	105.13	1.71214	2.21041e-05	5.6	4
						80	184.383	1.74265	0	6.7	4
						45	56.5913	1.62159	0.00222102	4.6	4
						40	64.5739	1.65269	0.000964715	4.9	4
						58.6207	83.3217	1.73103	0.000104848	5.6	5
						6.89655	9.98261	1.22048	0.419922	2.6	5
						93.1034	193.13	1.73796	0	6.7	5
						75.8621	157.304	1.75631	0	6.6	5
						37.931	56.1217	1.68946	0.00120238	5.1	5
						37.931	55.4087	1.68938	0.00118538	5.1	5
						51.7241	126.122	1.76756	7.5346e-07	6.5	5
						62.069	107.843	1.74333	3.29884e-06	6	5
						37.931	43.687	1.62768	0.00414872	4.6	5
						37.931	61.8783	1.69982	0.000759708	5.3	5
						55.1724	120.8	1.76952	7.73402e-07	6.5	5
						75.8621	156.139	1.75411	0	6.6	5
						24.1379	43.4435	1.64228	0.00372793	4.7	5
						58.6207	107.27	1.74062	3.30726e-06	6	5
						86.2069	189.809	1.74111	0	6.7	5
						48.2759	60.5913	1.69606	0.000863176	5.2	5
						55.1724	130.522	1.76771	0	6.6	5
						10.3448	10.9043	1.23571	0.384533	2.7	5
						65.5172	154.417	1.75526	0	6.6	5
						62.069	129.096	1.76642	7.42132e-07	6.5	5
						44.8276	99.113	1.77881	4.40794e-06	6.3	5
						13.7931	16.2783	1.343	0.186657	3	5
						37.931	47.0783	1.65971	0.00276449	4.8	5
						24.1379	46.3826	1.65192	0.00295819	4.8	5
						58.6207	111.409	1.74655	1.61981e-06	6	5
						17.2414	57.5304	1.75851	0.000570331	5.7	5
						62.069	110	1.74333	1.63091e-06	6	5
						72.4138	153.948	1.75293	0	6.6	5
						31.0345	37.913	1.59482	0.00704464	4.3	5
						58.6207	112.887	1.74182	8.02983e-07	6	5
						62.069	161.322	1.75263	0	6.7	5
						41.3793	84.0174	1.77704	4.72046e-05	6.1	5
						86.2069	178.035	1.74433	0	6.6	5
						27.5862	43.8087	1.6342	0.00380571	4.7	5
						17.2414	41.6696	1.63359	0.00424057	4.6	5
						86.2069	154.017	1.74092	0	6.3	5
						31.0345	48.3304	1.6636	0.00239609	4.9	5
						79.3103	163.217	1.75079	0	6.6	5
						37.931	46.1217	1.65118	0.003075	4.8	5
						72.4138	115.287	1.74289	2.38176e-06	6	5
						17.2414	24.9565	1.47612	0.0395647	3.6	5
						31.0345	58.6087	1.70256	0.000847255	5.2	5
						27.5862	28	1.51453	0.0233276	3.8	5
						68.9655	151.774	1.7579	0	6.5	5
						62.069	79.0957	1.7268	0.000163992	5.6	5
						13.7931	36.087	1.59413	0.00720846	4.4	5
						86.2069	165.513	1.74879	0	6.6	5
						68.9655	156.817	1.75298	0	6.6	5
						55.1724	100.678	1.74616	9.44251e-06	5.9	5
						62.069	125.217	1.76952	0	6.5	5
						58.6207	141.896	1.76483	0	6.6	5
						37.931	98	1.78223	4.43478e-06	6.4	5
						79.3103	155.652	1.7542	0	6.6	5
						65.5172	105.461	1.74426	6.69311e-06	5.9	5
						48.2759	124.713	1.77355	0	6.6	5
						62.069	154.957	1.75618	0	6.6	5
						93.1034	187.722	1.74149	0	6.7	5
						37.931	63.8609	1.70988	0.000537834	5.3	5
						72.4138	117.043	1.74443	0	6	5
						13.7931	57.2	1.76887	0.000527072	5.7	5
						51.7241	143.096	1.76523	0	6.7	5
						62.069	143.339	1.75995	0	6.6	5
						10.3448	22.8522	1.45439	0.054628	3.4	5
						10.3448	23.0435	1.45587	0.0501652	3.5	5
						24.1379	56.0348	1.69499	0.000982309	5.2	5
						72.4138	145.391	1.75743	0	6.6	5
						31.0345	50.0522	1.67629	0.00191739	5	5
						65.5172	143.339	1.76239	0	6.6	5
						51.7241	121.53	1.76955	0	6.4	5
						34.4828	61.2696	1.70651	0.000685548	5.3	5
						20.6897	59.9826	1.70578	0.000629634	5.3	5
						93.1034	193.113	1.73734	0	6.7	5
						41.3793	104.383	1.7768	2.55224e-06	6.4	5
						62.069	150.591	1.75773	0	6.6	5
						13.7931	6	1.13314	0.632545	2.5	5
						10.3448	13.1826	1.28518	0.280253	2.8	5
						65.5172	131.843	1.77089	0	6.5	5
						51.7241	90.3652	1.7389	4.01596e-05	5.8	5
						72.4138	119.635	1.74529	7.77512e-07	6.1	5
						55.1724	86.3652	1.73597	6.63933e-05	5.7	5
						6.89655	5.25217	1.1139	0.672684	2.4	5
						72.4138	158.383	1.75249	0	6.6	5
						82.7586	174.4	1.74315	0	6.7	5
						34.4828	38.3826	1.59801	0.00728877	4.3	5
						75.8621	139.443	1.76278	0	6.5	5
						75.8621	145.513	1.76033	0	6.5	5
						51.7241	76.9391	1.72579	0.00016124	5.6	5
						41.3793	96.2435	1.77664	4.48881e-06	6.3	5
						51.7241	76.4696	1.71938	0.000209288	5.5	5
						34.4828	38.6087	1.60209	0.00609523	4.4	5
						68.9655	105.113	1.7421	6.69949e-06	5.9	5
						20.6897	37.5652	1.60294	0.0067807	4.4	5
						89.6552	187.652	1.74083	0	6.7	5
						68.9655	133.548	1.76363	0	6.5	5
						48.2759	107.165	1.78003	8.36956e-07	6.4	5
						6.89655	3.42609	1.07905	0.782589	2.4	5
						31.0345	43.2522	1.63595	0.00419803	4.6	5
						20.6897	25.1304	1.48221	0.0385735	3.6	5
						48.2759	103.704	1.74647	3.37455e-06	6	5
						75.8621	160.817	1.75107	0	6.6	5
						17.3913	16.5565	1.34091	0.19922	3	6
						60.8696	113.165	1.76699	0	6.3	6
						82.6087	165.6	1.75179	0	6.6	6
						39.1304	51.0261	1.66923	0.00235793	4.9	6
						82.6087	141.861	1.74744	0	6.2	6
						78.2609	151.496	1.75449	0	6.5	6
						86.9565	182.209	1.74563	0	6.7	6
						34.7826	72.2783	1.72806	0.000209961	5.6	6
						26.087	53.3391	1.68873	0.0016052	5.1	6
						65.2174	155.826	1.75603	0	6.7	6
						21.7391	45.4783	1.65216	0.00337022	4.8	6
						8.69565	15.7217	1.32426	0.219334	2.9	6
						47.8261	73.4957	1.73103	0.000250399	5.5	6
						8.69565	14.713	1.30916	0.255441	2.9	6
						43.4783	71.2	1.71436	0.000304704	5.4	6
						52.1739	86.6087	1.74048	8.10341e-05	5.7	6
						91.3043	164.713	1.73992	0	6.4	6
						73.913	140.209	1.75874	0	6.5	6
						30.4348	43.6	1.64101	0.00408746	4.7	6
						56.5217	110.852	1.77241	0	6.3	6
						30.4348	43.5826	1.63	0.00449583	4.6	6
						78.2609	163.965	1.75235	0	6.7	6
						65.2174	146.122	1.75623	0	6.5	6
						26.087	67.0435	1.72258	0.000367418	5.4	6
						26.087	38.6087	1.59958	0.00715151	4.4	6
						91.3043	157.93	1.74492	0	6.3	6
						34.7826	87.4957	1.75034	4.02586e-05	5.9	6
						30.4348	83.6174	1.77161	4.62159e-05	6	6
						43.4783	59.2348	1.69425	0.00107433	5.2	6
						69.5652	135.165	1.7508	0	6.3	6
						47.8261	89.3043	1.74262	4.89986e-05	5.8	6
						43.4783	76.5043	1.73353	0.000145174	5.6	6
						13.0435	24.1913	1.47042	0.0479547	3.5	6
						73.913	152.643	1.75623	0	6.6	6
						26.087	42.7652	1.62973	0.00477597	4.6	6
						26.087	83.7739	1.77866	3.05699e-05	6.1	6
						52.1739	91.7391	1.76945	2.13033e-05	6.1	6
						26.087	46.8174	1.64858	0.00330757	4.7	6
						52.1739	68.2783	1.71364	0.000437882	5.4	6
						86.9565	167.026	1.75067	0	6.6	6
						13.0435	30.4174	1.54543	0.0156414	4	6
						91.3043	189.896	1.73776	0	6.7	6
						34.7826	92.3478	1.78059	1.29212e-05	6.3	6
						34.7826	98.487	1.77801	8.84723e-06	6.3	6
						78.2609	156.452	1.75557	0	6.6	6
						43.4783	118.243	1.77663	0	6.5	6
						73.913	130.922	1.74992	0	6.2	6
						39.1304	79.8435	1.76524	7.88964e-05	5.9	6
						39.1304	76.8696	1.76811	9.95945e-05	5.9	6
						17.3913	19.1478	1.38184	0.132513	3.1	6
						30.4348	53.8957	1.68518	0.00150164	5.1	6
						13.0435	43.6696	1.65473	0.00352146	4.8	6
						26.087	67.7913	1.72396	0.000329141	5.5	6
						86.9565	173.043	1.74668	0	6.6	6
						34.7826	75.7217	1.7419	0.000139405	5.7	6
						47.8261	103.861	1.752	5.07836e-06	6	6
						91.3043	184.139	1.74263	0	6.7	6
						13.0435	38.1913	1.62715	0.00565198	4.6	6
						17.3913	33.1652	1.57165	0.0110723	4.2	6
						13.0435	46.9565	1.71618	0.00203093	5.3	6
						39.1304	86.7304	1.77011	4.12734e-05	6.1	6
						60.8696	129.896	1.77102	0	6.5	6
						39.1304	104.261	1.77741	2.55474e-06	6.4	6
						56.5217	75.913	1.72437	0.000232986	5.5	6
						60.8696	149.287	1.75675	0	6.6	6
						56.5217	116.47	1.75073	0	6.1	6
						43.4783	85.5826	1.76584	4.83757e-05	6	6
						82.6087	168.8	1.7501	0	6.6	6
						73.913	153.409	1.75219	0	6.5	6
						86.9565	172.922	1.74702	0	6.6	6
						82.6087	161.583	1.74869	0	6.5	6
						43.4783	97.2348	1.77054	8.02437e-06	6.2	6
						91.3043	172.922	1.74539	0	6.6	6
						34.7826	70.2261	1.72759	0.000301773	5.5	6
						26.087	48.3478	1.67377	0.00254787	4.9	6
						78.2609	172.313	1.74772	0	6.7	6
						60.8696	96.8174	1.73964	2.37568e-05	5.8	6
						39.1304	86.4	1.77039	4.24084e-05	6.1	6
						56.5217	113.304	1.76947	1.61761e-06	6.3	6
						52.1739	112.278	1.76872	0	6.3	6
						52.1739	111.374	1.74968	8.12538e-07	6.1	6
						34.7826	59.6174	1.70492	0.000853047	5.3	6
						43.4783	116.017	1.7772	0	6.5	6
						30.4348	90	1.77689	1.31554e-05	6.2	6
						39.1304	79.4261	1.77288	5.6068e-05	6	6
						26.087	38.8696	1.60433	0.00674969	4.4	6
						39.1304	84.1565	1.74068	6.58957e-05	5.8	6
						21.7391	56.3478	1.73605	0.000874527	5.5	6
						26.087	69.7217	1.73423	0.000272313	5.6	6
						39.1304	66.1913	1.71486	0.000506047	5.3	6
						56.5217	110.296	1.77056	2.46574e-06	6.2	6
						30.4348	62.8348	1.74736	0.000521924	5.6	6
						13.0435	13.913	1.29097	0.285664	2.8	6
						82.6087	170.191	1.75236	0	6.6	6
						21.7391	23.7565	1.45218	0.0591469	3.4	6
						43.4783	58.8348	1.69303	0.0011053	5.1	6
						30.4348	79.2348	1.77807	5.83206e-05	6	6
						69.5652	152.609	1.75551	0	6.5	6
						34.7826	99.7565	1.7781	6.14422e-06	6.3	6
						8.69565	11.1478	1.23822	0.395935	2.7	6
						23.5294	36.9217	1.51364	0.0120645	3.7	7
						64.7059	86.9043	1.69214	0.000203407	5.3	7
						64.7059	159.043	1.75347	0	6.6	7
						82.3529	173.13	1.74579	0	6.6	7
						70.5882	136.643	1.75623	0	6.3	7
						64.7059	138.591	1.75747	0	6.4	7
						58.8235	156.609	1.75453	0	6.6	7
						52.9412	125.13	1.76469	0	6.3	7
						41.1765	21.913	1.3389	0.144582	2.8	7
						29.4118	44.6609	1.55882	0.00630722	4.1	7
						88.2353	171.704	1.7441	0	6.5	7
						76.4706	128.678	1.72799	0	6	7
						58.8235	69.2348	1.65463	0.0010537	4.8	7
						47.0588	46.5739	1.56645	0.00596152	4.1	7
						76.4706	139.965	1.75281	0	6.3	7
						47.0588	143.583	1.76032	0	6.5	7
						64.7059	125.13	1.75359	0	6.2	7
						29.4118	74.5739	1.68451	0.000370622	5.2	7
						58.8235	121.043	1.75885	7.76003e-07	6.2	7
						70.5882	152.765	1.75358	0	6.4	7
						29.4118	69.6522	1.67504	0.000632152	5.1	7
						64.7059	91.8783	1.70388	0.000106851	5.4	7
						23.5294	60.3304	1.65174	0.0013569	4.8	7
						47.0588	62.9043	1.64407	0.00142088	4.7	7
						47.0588	140.817	1.76084	0	6.5	7
						11.7647	16.2783	1.26544	0.276976	2.6	7
						17.6471	21.3391	1.33406	0.14231	2.8	7
						29.4118	74.5217	1.68395	0.000350842	5.2	7
						64.7059	163.078	1.75112	0	6.6	7
						52.9412	122.174	1.75897	0	6.3	7
						76.4706	157.478	1.75231	0	6.4	7
						58.8235	141.304	1.75489	0	6.4	7
						47.0588	55.1826	1.61709	0.00292476	4.5	7
						58.8235	109.096	1.72274	7.28333e-06	5.8	7
						11.7647	27.113	1.41415	0.0483761	3.2	7
						76.4706	145.583	1.72845	0	6.1	7
						35.2941	118.591	1.76584	7.8396e-07	6.3	7
						58.8235	125.061	1.75837	7.59564e-07	6.2	7
						29.4118	49.0783	1.59889	0.00399822	4.4	7
						58.8235	91.3217	1.70078	0.000121199	5.4	7
						41.1765	60.4696	1.64588	0.00158013	4.7	7
						76.4706	173.391	1.74714	0	6.7	7
						88.2353	166.296	1.74619	0	6.5	7
						88.2353	184.748	1.74197	0	6.7	7
						76.4706	140.522	1.73103	0	6.1	7
						35.2941	104.8	1.76318	5.0945e-06	6.1	7
						41.1765	49.0609	1.59578	0.0042023	4.4	7
						76.4706	148.765	1.75127	0	6.4	7
						29.4118	66.7652	1.7181	0.000528518	5.4	7
						47.0588	106.487	1.75559	1.67799e-06	6	7
						88.2353	193.878	1.73859	0	6.7	7
						52.9412	117.861	1.76427	0	6.2	7
						41.1765	78.7478	1.73874	0.00019632	5.6	7
						29.4118	75.9652	1.73407	0.000194085	5.6	7
						11.7647	49.7391	1.6725	0.00251528	4.9	7
						76.4706	130.939	1.75028	0	6.1	7
						23.5294	68.8522	1.72858	0.000377823	5.5	7
						88.2353	173.357	1.74868	0	6.6	7
						58.8235	122.574	1.76317	0	6.3	7
						70.5882	132.052	1.72858	0	6	7
						35.2941	98.487	1.76073	9.69197e-06	6.1	7
						29.4118	55.4957	1.68914	0.00158368	5.1	7
						47.0588	85.4261	1.74404	7.94215e-05	5.7	7
						41.1765	58.713	1.63426	0.00184256	4.7	7
						64.7059	105.478	1.71845	2.22654e-05	5.6	7
						35.2941	96.5565	1.76048	2.23491e-05	6	7
						70.5882	122.626	1.75427	0	6.1	7
						58.8235	75.8609	1.67661	0.000513669	5.1	7
						41.1765	52.5913	1.60766	0.00356119	4.4	7
						64.7059	150.157	1.75637	0	6.5	7
						47.0588	68.9043	1.66458	0.000790573	4.9	7
						52.9412	86.2435	1.69712	0.000201839	5.3	7
						23.5294	64.9739	1.71637	0.000630382	5.4	7
						52.9412	94.4696	1.74822	4.32805e-05	5.8	7
						35.2941	108.661	1.77073	0	6.2	7
						41.1765	54.5217	1.60731	0.00303339	4.4	7
						82.3529	162.087	1.74994	0	6.5	7
						29.4118	76.887	1.74049	0.000212709	5.6	7
						17.6471	46.7478	1.59107	0.0043884	4.4	7
						64.7059	125.704	1.7556	0	6.2	7
						76.4706	152.47	1.75499	0	6.5	7
						58.8235	103.809	1.71299	1.07787e-05	5.6	7
						82.3529	170.8	1.74772	0	6.6	7
						11.7647	17.0435	1.2759	0.257286	2.6	7
						11.7647	50.7478	1.67882	0.00230631	4.9	7
						58.8235	121.426	1.75794	0	6.2	7
						41.1765	79.513	1.7405	0.000144859	5.7	7
						52.9412	109.374	1.72018	8.07344e-06	5.7	7
						64.7059	112.591	1.72284	4.77947e-06	5.8	7
						52.9412	150.643	1.75662	0	6.6	7
						47.0588	79.9652	1.69215	0.00031032	5.2	7
						82.3529	161.652	1.74796	0	6.5	7
						11.7647	9.07826	1.15218	0.563297	2.4	7
						70.5882	142.296	1.75375	0	6.4	7
						29.4118	37.9304	1.51917	0.0114395	3.8	7
						58.8235	73.8261	1.67307	0.000565817	5	7
						47.0588	84.0348	1.6951	0.000194217	5.3	7
						11.7647	14.313	1.23648	0.349328	2.5	7
						88.2353	194.365	1.73924	0	6.7	7
						17.6471	19.3739	1.30723	0.192516	2.7	7
						10.5263	16.4	1.29235	0.237083	2.6	8
						21.0526	26.2957	1.44145	0.0461667	3.3	8
						84.2105	190.383	1.73584	0	6.7	8
						10.5263	3.46087	1.06525	0.813262	2.3	8
						31.5789	42	1.5653	0.00695973	4.1	8
						42.1053	84.7652	1.73544	8.23123e-05	5.7	8
						68.4211	139.6	1.76168	0	6.4	8
						42.1053	78.7304	1.73106	0.000184584	5.6	8
						73.6842	157.757	1.75372	0	6.5	8
						36.8421	46.7826	1.60525	0.00461099	4.4	8
						15.7895	36.7478	1.53953	0.010223	3.9	8
						52.6316	96.887	1.73303	2.27734e-05	5.8	8
						31.5789	62.713	1.69831	0.000774105	5.2	8
						73.6842	125.078	1.74276	0	6.1	8
						47.3684	56.6783	1.639	0.0021872	4.7	8
						26.3158	24.487	1.40013	0.0749015	3.1	8
						73.6842	148.226	1.74229	0	6.3	8
						68.4211	130.313	1.7473	0	6.1	8
						47.3684	112.678	1.77049	8.11121e-07	6.3	8
						10.5263	14.2957	1.25521	0.314834	2.5	8
						63.1579	144.609	1.75002	0	6.3	8
						73.6842	155.704	1.75577	0	6.6	8
						47.3684	81.2696	1.70868	0.000196508	5.4	8
						21.0526	60.0522	1.70929	0.000861479	5.2	8
						63.1579	76.9913	1.69164	0.000418847	5.1	8
						73.6842	164.087	1.75067	0	6.6	8
						84.2105	187.496	1.74042	0	6.7	8
						10.5263	20.9913	1.3596	0.123949	2.9	8
						31.5789	75.8609	1.73671	0.000190139	5.6	8
						52.6316	97.1478	1.7402	2.10386e-05	5.8	8
						52.6316	119.27	1.75148	1.56073e-06	6.1	8
						78.9474	144.609	1.74701	0	6.2	8
						31.5789	61.6	1.68986	0.000850749	5.2	8
						57.8947	121.287	1.75251	0	6.1	8
						63.1579	87.5478	1.70754	0.000157574	5.4	8
						10.5263	47.913	1.65298	0.00290416	4.8	8
						31.5789	98.6609	1.77428	1.76808e-06	6.2	8
						57.8947	94	1.71998	6.28488e-05	5.6	8
						42.1053	109.6	1.7745	8.25578e-07	6.3	8
						89.4737	177.478	1.74312	0	6.6	8
						31.5789	62.5043	1.69507	0.000797429	5.2	8
						47.3684	125.913	1.76454	0	6.4	8
						57.8947	117.443	1.76584	0	6.3	8
						26.3158	86.3304	1.77607	3.3737e-05	6.1	8
						15.7895	60.6609	1.7089	0.000770757	5.3	8
						84.2105	146.47	1.74803	0	6.3	8
						15.7895	65.3565	1.72189	0.000440839	5.4	8
						47.3684	97.7217	1.75183	1.05631e-05	5.9	8
						47.3684	107.322	1.75577	4.99114e-06	6.1	8
						57.8947	139.948	1.76441	0	6.5	8
						78.9474	150.417	1.75007	0	6.4	8
						26.3158	23.7043	1.3878	0.0865513	3	8
						89.4737	179.843	1.74141	0	6.6	8
						26.3158	57.5478	1.6768	0.00136112	5	8
						15.7895	57.6696	1.71296	0.000896927	5.3	8
						84.2105	179.443	1.74517	0	6.7	8
						78.9474	185.809	1.74156	0	6.7	8
						31.5789	76.6261	1.73849	0.0001609	5.6	8
						47.3684	65.6696	1.67566	0.000910634	5	8
						10.5263	15.1478	1.26999	0.285711	2.6	8
						89.4737	178.817	1.74541	0	6.6	8
						63.1579	152.87	1.7578	0	6.6	8
						42.1053	57.3217	1.65155	0.00187776	4.7	8
						36.8421	33.513	1.49955	0.0176334	3.6	8
						42.1053	94.4348	1.77223	1.09168e-05	6.1	8
						10.5263	3.72174	1.06637	0.802585	2.4	8
						31.5789	62.6435	1.69171	0.000789746	5.2	8
						47.3684	83.5304	1.70291	0.000174202	5.4	8
						21.0526	52.887	1.67847	0.00184002	5	8
						10.5263	6.5913	1.11873	0.658003	2.4	8
						78.9474	131.93	1.74937	0	6.2	8
						31.5789	43.7217	1.58624	0.00572499	4.2	8
						10.5263	10.4174	1.18376	0.478842	2.5	8
						84.2105	178.974	1.74305	0	6.7	8
						31.5789	25.3913	1.41065	0.0658485	3.1	8
						10.5263	7.94783	1.14308	0.594162	2.5	8
						84.2105	142.713	1.74185	0	6.2	8
						15.7895	14.1217	1.24743	0.330397	2.6	8
						31.5789	50.3304	1.62487	0.00315258	4.5	8
						73.6842	139.183	1.74883	0	6.3	8
						89.4737	183.339	1.74283	0	6.6	8
						78.9474	165.809	1.75435	0	6.6	8
						47.3684	76.1565	1.72074	0.000242481	5.5	8
						10.5263	7.09565	1.12709	0.631426	2.4	8
						57.8947	122.748	1.76409	0	6.3	8
						42.1053	126.383	1.76831	0	6.5	8
						78.9474	160.104	1.75232	0	6.6	8
						26.3158	59.513	1.68486	0.00105227	5.1	8
						10.5263	6.13913	1.11191	0.67749	2.3	8
						52.6316	93.4609	1.73388	4.11424e-05	5.7	8
						57.8947	107.826	1.74886	3.3173e-06	6	8
						63.1579	133.722	1.75265	0	6.2	8
						68.4211	119.826	1.74954	0	6.1	8
						15.7895	35.3217	1.52744	0.0120614	3.9	8
						68.4211	122.104	1.74212	0	6	8
						10.5263	26.2783	1.43745	0.0441816	3.3	8
						10.5263	8.62609	1.15744	0.560965	2.4	8
						36.8421	52.8	1.63425	0.00256471	4.6	8
						84.2105	191.304	1.7401	0	6.7	8
						42.1053	54.6087	1.63404	0.0024807	4.6	8
						89.4737	187.113	1.74213	0	6.7	9
						10.5263	14.5043	1.25783	0.286693	2.5	9
						42.1053	110.591	1.77396	8.2062e-07	6.3	9
						15.7895	18.3826	1.31786	0.170058	2.7	9
						84.2105	172.835	1.74772	0	6.6	9
						68.4211	149.322	1.75886	0	6.5	9
						52.6316	96.487	1.70505	4.59989e-05	5.6	9
						73.6842	154.643	1.75513	0	6.5	9
						63.1579	147.322	1.75903	0	6.5	9
						78.9474	165.2	1.75297	0	6.6	9
						78.9474	171.339	1.74706	0	6.6	9
						26.3158	43.8957	1.5692	0.00550754	4.2	9
						21.0526	65.6174	1.75414	0.00032283	5.7	9
						52.6316	113.722	1.76693	0	6.2	9
						36.8421	51.6522	1.61326	0.00292628	4.5	9
						57.8947	109.774	1.76799	8.25895e-07	6.2	9
						36.8421	125.009	1.77166	0	6.5	9
						47.3684	79.513	1.68532	0.000266075	5.3	9
						63.1579	108.504	1.71587	9.67535e-06	5.7	9
						63.1579	135.843	1.75872	0	6.4	9
						31.5789	94.7826	1.77524	7.26724e-06	6.2	9
						21.0526	74.6609	1.76783	0.000100641	5.9	9
						31.5789	87.4609	1.77188	2.96197e-05	6.1	9
						73.6842	121.461	1.71929	0	5.9	9
						42.1053	110.365	1.77038	8.21693e-07	6.3	9
						42.1053	104.609	1.77056	1.7021e-06	6.2	9
						47.3684	64.5043	1.65335	0.000972693	4.9	9
						47.3684	125.478	1.76774	0	6.5	9
						42.1053	75.3217	1.68243	0.000325588	5.3	9
						84.2105	192.73	1.73992	0	6.7	9
						42.1053	110.922	1.77057	8.19331e-07	6.3	9
						68.4211	121.478	1.72123	0	5.9	9
						31.5789	86.713	1.77	4.13278e-05	6.1	9
						47.3684	133.304	1.76217	0	6.5	9
						42.1053	79.7217	1.68402	0.000220538	5.3	9
						31.5789	71.8609	1.67547	0.000386569	5.2	9
						47.3684	136.852	1.76227	0	6.5	9
						68.4211	157.026	1.75253	0	6.6	9
						36.8421	49.0783	1.60328	0.00339795	4.5	9
						52.6316	90.313	1.7033	8.45989e-05	5.5	9
						47.3684	126.8	1.77035	0	6.5	9
						15.7895	32.6261	1.49621	0.0156323	3.7	9
						73.6842	170.087	1.75189	0	6.7	9
						57.8947	128.939	1.76408	0	6.4	9
						21.0526	85.9652	1.77371	2.905e-05	6.1	9
						73.6842	114.191	1.71432	8.624e-06	5.8	9
						68.4211	99.8261	1.70515	3.26798e-05	5.6	9
						84.2105	146.904	1.7256	0	6.1	9
						73.6842	147.791	1.75623	0	6.5	9
						52.6316	57.7565	1.62785	0.0019756	4.7	9
						31.5789	32.087	1.47778	0.0193718	3.6	9
						26.3158	47.8783	1.59789	0.00357559	4.5	9
						73.6842	139.774	1.76257	0	6.4	9
						57.8947	80.2783	1.6864	0.000264876	5.3	9
						78.9474	115.583	1.71787	4.68458e-06	5.8	9
						36.8421	67.913	1.66938	0.00061761	5.1	9
						84.2105	179.026	1.74616	0	6.7	9
						10.5263	6.66087	1.11891	0.637893	2.2	9
						89.4737	140.609	1.72435	0	6	9
						47.3684	60.7652	1.64607	0.00135741	4.8	9
						89.4737	171.27	1.74451	0	6.6	9
						26.3158	29.0261	1.45196	0.0299005	3.4	9
						68.4211	140.452	1.76019	0	6.5	9
						84.2105	168.487	1.75	0	6.6	9
						89.4737	193.826	1.73645	0	6.7	9
						26.3158	73.7391	1.76168	0.000157587	5.8	9
						84.2105	176.243	1.7444	0	6.6	9
						63.1579	124.452	1.76514	0	6.4	9
						10.5263	18.487	1.31436	0.16973	2.7	9
						52.6316	83.6348	1.69425	0.000176231	5.4	9
						10.5263	54.5391	1.73164	0.00109942	5.4	9
						15.7895	63.513	1.74834	0.000413926	5.7	9
						52.6316	96.3652	1.70796	3.67075e-05	5.6	9
						47.3684	69.0087	1.67045	0.000630515	5.1	9
						21.0526	38.0174	1.53552	0.00856572	4	9
						10.5263	19.6174	1.33793	0.142152	2.8	9
						89.4737	194.974	1.73903	0	6.7	9
						52.6316	116.365	1.77005	1.58979e-06	6.3	9
						78.9474	164.887	1.75406	0	6.6	9
						21.0526	15.2696	1.26617	0.273142	2.6	9
						73.6842	167.809	1.74921	0	6.6	9
						47.3684	66.3826	1.65689	0.000900631	4.9	9
						26.3158	43.0783	1.56619	0.00581988	4.2	9
						73.6842	169.096	1.74549	0	6.6	9
						15.7895	23.513	1.38944	0.0744388	3.1	9
						31.5789	49.0435	1.59804	0.00341906	4.5	9
						42.1053	107.965	1.77341	1.66705e-06	6.3	9
						63.1579	143.896	1.7575	0	6.5	9
						84.2105	138	1.72406	0	6	9
						10.5263	16.6783	1.2896	0.226597	2.6	9
						78.9474	111.878	1.71435	7.92854e-06	5.7	9
						10.5263	58.0522	1.74232	0.000779557	5.5	9
						15.7895	24.7826	1.4001	0.0609132	3.1	9
						21.0526	34.8	1.5051	0.0126291	3.8	9
						57.8947	138.835	1.76418	0	6.5	9
						84.2105	184.8	1.74191	0	6.7	9
						36.8421	117.026	1.77272	0	6.4	9
						57.8947	132.504	1.76588	0	6.5	9
						15.7895	31.4783	1.48665	0.0180204	3.6	9
						73.6842	154.73	1.75468	0	6.5	10
						26.3158	42.9043	1.53833	0.00688882	3.9	10
						10.5263	2.45217	1.04206	0.873769	2.1	10
						78.9474	168.8	1.74837	0	6.6	10
						42.1053	80.7304	1.69226	0.00021064	5.3	10
						68.4211	112.33	1.71754	3.9621e-06	5.7	10
						57.8947	68.8696	1.64096	0.0010598	4.8	10
						36.8421	73.0609	1.67133	0.000427158	5.2	10
						78.9474	151.687	1.74832	0	6.4	10
						63.1579	162.835	1.75369	0	6.6	10
						89.4737	188.035	1.74077	0	6.7	10
						63.1579	123.078	1.75258	7.66279e-07	6.2	10
						26.3158	47.6	1.57043	0.00444727	4.2	10
						57.8947	81.6522	1.66806	0.00033565	5.1	10
						36.8421	82.0696	1.69351	0.000161237	5.4	10
						47.3684	90.9913	1.70337	6.92979e-05	5.5	10
						63.1579	157.339	1.75334	0	6.6	10
						57.8947	144.452	1.76271	0	6.6	10
						26.3158	40.6435	1.52787	0.00801728	3.9	10
						36.8421	127.443	1.77207	0	6.5	10
						31.5789	26.1565	1.38494	0.0614048	3	10
						73.6842	158.713	1.75092	0	6.6	10
						21.0526	30.5565	1.43443	0.0279383	3.2	10
						73.6842	178.626	1.74433	0	6.7	10
						63.1579	165.983	1.75436	0	6.7	10
						21.0526	84.4	1.74793	6.14652e-05	5.8	10
						84.2105	174.261	1.74421	0	6.6	10
						47.3684	67.7739	1.6419	0.00101899	4.8	10
						57.8947	99.7391	1.70476	3.44139e-05	5.6	10
						31.5789	46.8174	1.55823	0.00545295	4.1	10
						68.4211	171.722	1.74897	0	6.7	10
						73.6842	166.191	1.7468	0	6.6	10
						89.4737	190.157	1.74012	0	6.7	10
						84.2105	161.635	1.75399	0	6.5	10
						68.4211	88.6261	1.6802	0.000198257	5.2	10
						78.9474	177.374	1.74417	0	6.7	10
						63.1579	170.383	1.7479	0	6.7	10
						21.0526	107.27	1.77727	8.36044e-07	6.4	10
						42.1053	82.713	1.69875	0.000164555	5.4	10
						84.2105	147.461	1.74739	0	6.3	10
						47.3684	144.922	1.76107	0	6.6	10
						36.8421	122.991	1.77253	0	6.5	10
						36.8421	73.1652	1.6746	0.000446137	5.1	10
						47.3684	82.1565	1.69148	0.000221059	5.3	10
						47.3684	126.504	1.76302	0	6.4	10
						89.4737	179.026	1.74323	0	6.6	10
						73.6842	179.948	1.74609	0	6.7	10
						47.3684	146	1.75598	0	6.6	10
						73.6842	143.13	1.74715	0	6.3	10
						31.5789	90.3826	1.75289	3.05177e-05	5.9	10
						21.0526	24.6435	1.37027	0.0729961	2.9	10
						26.3158	36.9913	1.49959	0.0116344	3.7	10
						42.1053	85.7217	1.69878	0.000120993	5.4	10
						47.3684	68.1043	1.66289	0.000660009	5	10
						36.8421	64.6783	1.65998	0.000889718	5	10
						10.5263	51.5478	1.68782	0.00183868	5.1	10
						89.4737	161.53	1.7483	0	6.4	10
						31.5789	74.087	1.73896	0.000226359	5.6	10
						47.3684	80.0174	1.68824	0.000232897	5.3	10
						68.4211	120.365	1.7216	0	5.9	10
						89.4737	179.148	1.74224	0	6.6	10
						31.5789	25.9478	1.38046	0.065353	2.9	10
						21.0526	17.513	1.27417	0.235193	2.5	10
						36.8421	78.9217	1.73843	0.000118348	5.7	10
						10.5263	3.04348	1.04862	0.840036	2.1	10
						57.8947	111.861	1.75129	8.12175e-07	6	10
						36.8421	29.1478	1.41526	0.0388911	3.1	10
						21.0526	28.7826	1.4154	0.0349991	3.1	10
						47.3684	58.8348	1.61577	0.00224728	4.5	10
						73.6842	90.4696	1.68176	0.00018837	5.2	10
						78.9474	153.913	1.74708	0	6.4	10
						47.3684	135.513	1.76535	0	6.5	10
						26.3158	51.4783	1.61477	0.00280716	4.6	10
						10.5263	7.72174	1.12445	0.615966	2.2	10
						52.6316	137.774	1.76257	0	6.5	10
						42.1053	38.1391	1.49909	0.0115714	3.7	10
						36.8421	78.1565	1.73714	0.00013125	5.7	10
						36.8421	24.0522	1.35534	0.0943896	2.8	10
						84.2105	163.461	1.75159	0	6.5	10
						10.5263	16.2261	1.25907	0.267448	2.4	10
						52.6316	76.1913	1.66327	0.000544991	5	10
						57.8947	134.73	1.76431	0	6.5	10
						84.2105	187.983	1.74034	0	6.7	10
						10.5263	12.887	1.20419	0.392565	2.3	10
						31.5789	125.357	1.76796	0	6.5	10
						63.1579	117.53	1.71909	7.73368e-07	5.8	10
						68.4211	103.27	1.70891	2.72294e-05	5.6	10
						47.3684	65.5478	1.63527	0.00114245	4.7	10
						31.5789	41.6522	1.53394	0.0075108	3.9	10
						73.6842	159.304	1.75244	0	6.5	10
						10.5263	10.7478	1.168	0.481485	2.3	10
						42.1053	75.687	1.73489	0.000221207	5.6	10
						26.3158	41.6696	1.53305	0.00782956	3.9	10
						57.8947	94.6957	1.70402	5.7722e-05	5.5	10
						10.5263	20.1565	1.31162	0.15555	2.6	10
						15.7895	70.5739	1.73303	0.000290564	5.6	10
						21.0526	57.9826	1.64755	0.00129467	4.9	10
						73.6842	168.574	1.74743	0	6.6	10
						21.0526	25.2522	1.37779	0.0661567	2.9	10
						84.2105	153.374	1.74932	0	6.3	10
